# Supplementary material for: Synthesis of Four Orthogonally Protected Rare l-Hexose Thioglycosides from d-Mannose by C-5 and C-4 Epimerization
Source: MDPI journal article supplement (doi:10.3390/molecules27113422), 2022-05-25
Supplement: s1 [file s1]

# checkCIF () running

Checking for embedded fcf data in CIF ...

Found embedded fcf data in CIF. Extracting fcf data from uploaded CIF, please wait ...

## checkCIF/PLATON (full publication check)

You have not supplied any structure factors. As a result the full set of tests cannot be run.

THIS REPORT IS FOR GUIDANCE ONLY. IF USED AS PART OF A REVIEW PROCEDURE FOR PUBLICATION, IT SHOULD NOT REPLACE THE EXPERTISE OF AN EXPERIENCED CRYSTALLOGRAPHIC REFEREE. You have not supplied any structure factors. As a result the full set of tests cannot be run.

No syntax errors found. [CIF dictionary](#)

Please wait while processing .... [Interpreting this report](#)

[Structure factor report](#)

### Datablock: I

|                        |                                            |                                  |             |
|------------------------|--------------------------------------------|----------------------------------|-------------|
| Bond precision:        | C-C = 0.0327 Å                             | Wavelength=0.71073               |             |
| Cell:                  | a=21.29 (2)                                | b=5.411 (4)                      | c=26.79 (2) |
|                        | alpha=90                                   | beta=95.97 (4)                   | gamma=90    |
| Temperature:           | 199 K                                      |                                  |             |
|                        | Calculated                                 | Reported                         |             |
| Volume                 | 3070 (4)                                   | 3069 (5)                         |             |
| Space group            | C 2                                        | C 1 2 1                          |             |
| Hall group             | C 2y                                       | C 2y                             |             |
| Moiety formula         | C37 H34 O5 S                               | C37 H34 O5 S                     |             |
| Sum formula            | C37 H34 O5 S                               | C37 H34 O5 S                     |             |
| Mr                     | 590.70                                     | 590.70                           |             |
| Dx, g cm <sup>-3</sup> | 1.278                                      | 1.278                            |             |
| Z                      | 4                                          | 4                                |             |
| Mu (mm <sup>-1</sup> ) | 0.149                                      | 0.149                            |             |
| F000                   | 1248.0                                     | 1248.0                           |             |
| F000'                  | 1249.06                                    |                                  |             |
| h, k, lmax             | 21, 5, 27                                  | 21, 5, 27                        |             |
| Nref                   | 3556 [ 2013]                               | 3399                             |             |
| Tmin, Tmax             | 0.987, 0.993                               | 0.630, 0.990                     |             |
| Tmin'                  | 0.949                                      |                                  |             |
| Correction method=     | # Reported T Limits: Tmin=0.630 Tmax=0.990 | AbsCorr = MULTI-SCAN             |             |
| Data completeness=     | 1.69/0.96                                  | Theta (max)= 21.520              |             |
| R(reflections)=        | 0.0979 ( 1822)                             | wR2(reflections)= 0.2897 ( 3399) |             |
| S =                    | Npar=                                      |                                  |             |
| 1.052                  | 389                                        |                                  |             |

The following ALERTS were generated. Each ALERT has the format

**test-name\_ALERT\_alert-type\_alert-level.**

Click on the hyperlinks for more details of the test.

#### Alert level A

|                                   |                                                            |
|-----------------------------------|------------------------------------------------------------|
| <a href="#">THETM01_ALERT_3_A</a> | The value of sine(theta_max)/wavelength is less than 0.550 |
|                                   | Calculated sin(theta_max)/wavelength = 0.5161              |

**Author Response: All crystals were weakly diffracting.**

[PLAT023\\_ALERT\\_3\\_A](#) Resolution (too) Low [sin(theta)/Lambda < 0.6].. 0.52 Ang-1

**Author Response: Also related to the fact that all crystals were weakly diffracting. The structure is considered to be correct.**

[PLAT331\\_ALERT\\_2\\_A](#) Small Aver Phenyl C-C Dist C31 --C36 . 1.33 Ang.

**Author Response: Chemical evidence supports that the structure is correct.**

#### Alert level B

|                                   |                                               |        |       |
|-----------------------------------|-----------------------------------------------|--------|-------|
| <a href="#">PLAT089_ALERT_3_B</a> | Poor Data / Parameter Ratio (Zmax < 18) ..... | 5.17   | Note  |
| <a href="#">PLAT242_ALERT_2_B</a> | Low 'MainMol' Ueq as Compared to Neighbors of | C31    | Check |
| <a href="#">PLAT340_ALERT_3_B</a> | Low Bond Precision on C-C Bonds .....         | 0.0327 | Ang.  |

#### Alert level C

|                                   |                                                            |       |        |
|-----------------------------------|------------------------------------------------------------|-------|--------|
| <a href="#">RINTA01_ALERT_3_C</a> | The value of Rint is greater than 0.12<br>Rint given 0.164 |       |        |
| <a href="#">PLAT020_ALERT_3_C</a> | The Value of Rint is Greater Than 0.12 .....               | 0.164 | Report |
| <a href="#">PLAT029_ALERT_3_C</a> | diffn measured fraction theta full value Low .             | 0.971 | Why?   |
| <a href="#">PLAT084_ALERT_3_C</a> | High wR2 Value (i.e. > 0.25) .....                         | 0.29  | Report |
| <a href="#">PLAT220_ALERT_2_C</a> | NonSolvent Resd 1 C Ueq(max)/Ueq(min) Range                | 3.4   | Ratio  |
| <a href="#">PLAT241_ALERT_2_C</a> | High 'MainMol' Ueq as Compared to Neighbors of             | C20   | Check  |

#### And 4 other PLAT241 Alerts

|                                   |                                                |      |       |
|-----------------------------------|------------------------------------------------|------|-------|
| <a href="#">PLAT241_ALERT_2_C</a> | High 'MainMol' Ueq as Compared to Neighbors of | C32  | Check |
| <a href="#">PLAT241_ALERT_2_C</a> | High 'MainMol' Ueq as Compared to Neighbors of | C33  | Check |
| <a href="#">PLAT241_ALERT_2_C</a> | High 'MainMol' Ueq as Compared to Neighbors of | C36  | Check |
| <a href="#">PLAT241_ALERT_2_C</a> | High 'MainMol' Ueq as Compared to Neighbors of | C45  | Check |
| <a href="#">PLAT242_ALERT_2_C</a> | Low 'MainMol' Ueq as Compared to Neighbors of  | C34  | Check |
| <a href="#">PLAT331_ALERT_2_C</a> | Small Aver Phenyl C-C Dist C21 --C26 .         | 1.37 | Ang.  |

**Author Response: Chemical evidence supports that the structure is correct.**

|                                   |                                           |      |      |
|-----------------------------------|-------------------------------------------|------|------|
| <a href="#">PLAT332_ALERT_2_C</a> | Large Phenyl C-C Range C31 -C36 .         | 0.22 | Ang. |
| <a href="#">PLAT334_ALERT_2_C</a> | Small Aver. Benzene C-C Dist C44A -C48A . | 1.36 | Ang. |
| <a href="#">PLAT368_ALERT_2_C</a> | Short C(sp2)-C(sp2) Bond C34 - C35 .      | 1.22 | Ang. |

#### Alert level G

|                                   |                                                  |       |        |
|-----------------------------------|--------------------------------------------------|-------|--------|
| <a href="#">PLAT072_ALERT_2_G</a> | SHELXL First Parameter in WGHT Unusually Large   | 0.13  | Report |
| <a href="#">PLAT187_ALERT_4_G</a> | The CIF-Embedded .res File Contains RIGU Records | 1     | Report |
| <a href="#">PLAT335_ALERT_2_G</a> | Check Large C6 Ring C-C Range C41 -C48A          | 0.16  | Ang.   |
| <a href="#">PLAT335_ALERT_2_G</a> | Check Large C6 Ring C-C Range C44A -C48A         | 0.16  | Ang.   |
| <a href="#">PLAT398_ALERT_2_G</a> | Deviating C-O-C Angle From 120 for O4 .          | 109.3 | Degree |
| <a href="#">PLAT398_ALERT_2_G</a> | Deviating C-O-C Angle From 120 for O60 .         | 109.5 | Degree |
| <a href="#">PLAT720_ALERT_4_G</a> | Number of Unusual/Non-Standard Labels .....      | 1     | Note   |
| <a href="#">PLAT791_ALERT_4_G</a> | Model has Chirality at C1 (Sohnke SpGr)          | R     | Verify |

#### And 5 other PLAT791 Alerts

|                                   |                                                  |     |        |
|-----------------------------------|--------------------------------------------------|-----|--------|
| <a href="#">PLAT791_ALERT_4_G</a> | Model has Chirality at C2 (Sohnke SpGr)          | S   | Verify |
| <a href="#">PLAT791_ALERT_4_G</a> | Model has Chirality at C3 (Sohnke SpGr)          | S   | Verify |
| <a href="#">PLAT791_ALERT_4_G</a> | Model has Chirality at C4 (Sohnke SpGr)          | S   | Verify |
| <a href="#">PLAT791_ALERT_4_G</a> | Model has Chirality at C5 (Sohnke SpGr)          | S   | Verify |
| <a href="#">PLAT791_ALERT_4_G</a> | Model has Chirality at C40 (Sohnke SpGr)         | R   | Verify |
| <a href="#">PLAT860_ALERT_3_G</a> | Number of Least-Squares Restraints .....         | 343 | Note   |
| <a href="#">PLAT933_ALERT_2_G</a> | Number of HKL-OMIT Records in Embedded .res File | 13  | Note   |

- 3 **ALERT level A** = Most likely a serious problem - resolve or explain  
 3 **ALERT level B** = A potentially serious problem, consider carefully  
 15 **ALERT level C** = Check. Ensure it is not caused by an omission or oversight  
 15 **ALERT level G** = General information/check it is not something unexpected

0 ALERT type 1 CIF construction/syntax error, inconsistent or missing data  
19 ALERT type 2 Indicator that the structure model may be wrong or deficient  
9 ALERT type 3 Indicator that the structure quality may be low  
8 ALERT type 4 Improvement, methodology, query or suggestion  
0 ALERT type 5 Informative message, check

---

## checkCIF publication errors

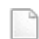

### Alert level A

[PUBL006\\_ALERT\\_1\\_A](#) publ requested journal is missing  
e.g. 'Acta Crystallographica Section C'

---

**Author Response: Organic Chemistry Frontiers**

---

1 **ALERT level A** = Data missing that is essential or data in wrong format  
0 **ALERT level G** = General alerts. Data that may be required is missing

---

### Publication of your CIF

You should attempt to resolve as many as possible of the alerts in all categories. Often the minor alerts point to easily fixed oversights, errors and omissions in your CIF or refinement strategy, so attention to these fine details can be worthwhile. In order to resolve some of the more serious problems it may be necessary to carry out additional measurements or structure refinements. However, the nature of your study may justify the reported deviations from journal submission requirements and the more serious of these should be commented upon in the discussion or experimental section of a paper or in the "special\_details" fields of the CIF. *checkCIF* was carefully designed to identify outliers and unusual parameters, but every test has its limitations and alerts that are not important in a particular case may appear. Conversely, the absence of alerts does not guarantee there are no aspects of the results needing attention. It is up to the individual to critically assess their own results and, if necessary, seek expert advice.

If you wish to submit your CIF for publication in Acta Crystallographica Section C or E, you should upload your CIF via [the web](#). If you wish to submit your CIF for publication in IUCrData, you should upload your CIF via [the web](#). If your CIF is to form part of a submission to another IUCr journal, you will be asked, either during electronic [submission](#) or by the Co-editor handling your paper, to upload your CIF via our web site.

---

**PLATON version of 19/02/2022; check.def file version of 19/01/2022**

### Datablock I - ellipsoid plot

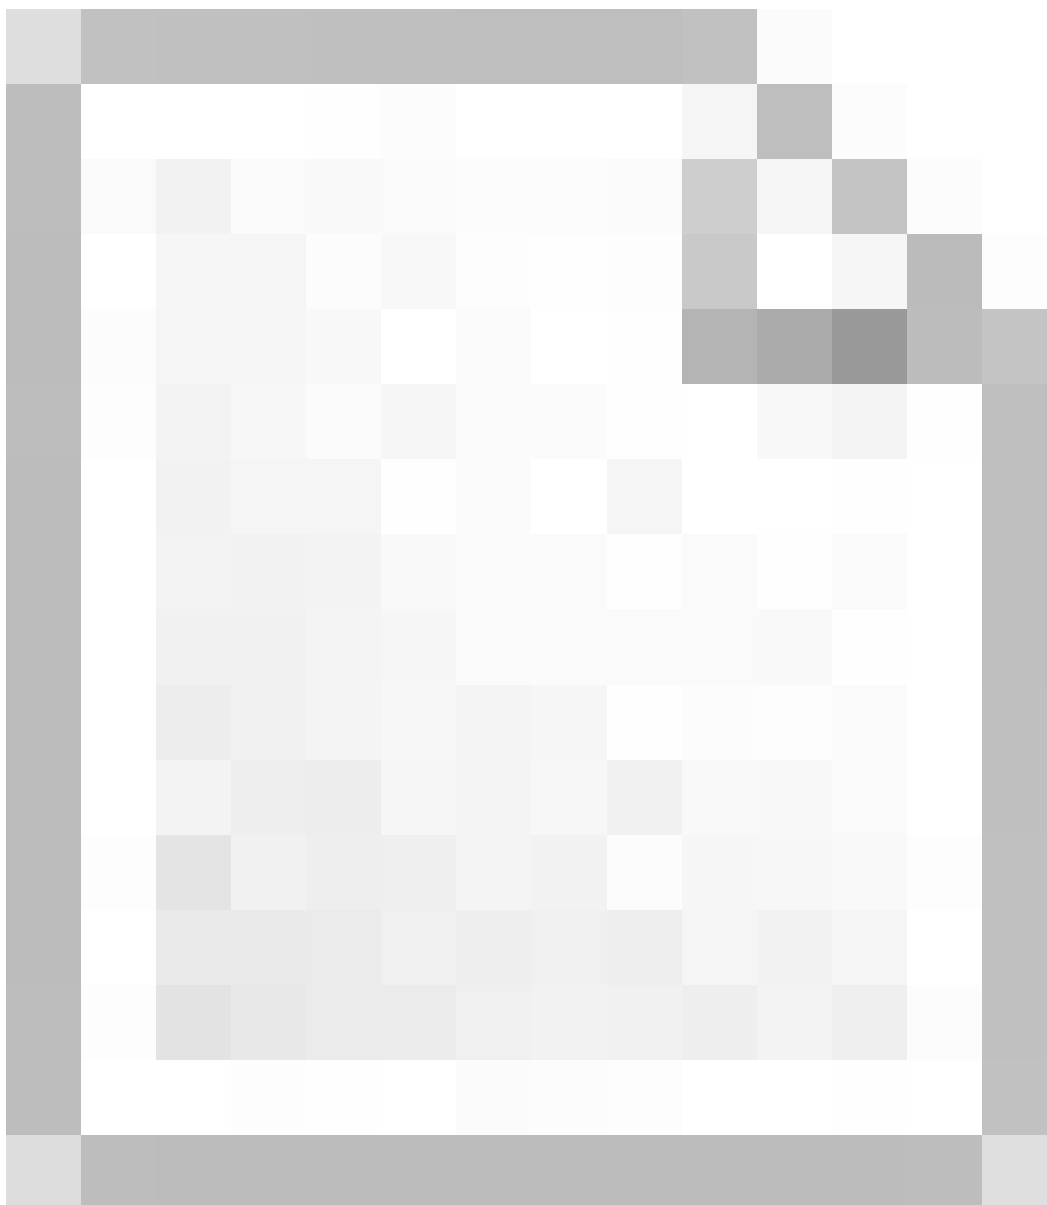

---

[Download CIF editor \(publCIF\) from the IUCr.](#)  
[Download CIF editor \(enCIFer\) from the CCDC.](#)  
[Test a new CIF entry.](#)
