# Supplementary material for: Synthesis of Four Orthogonally Protected Rare l-Hexose Thioglycosides from d-Mannose by C-5 and C-4 Epimerization
Source: MDPI journal article supplement (doi:10.3390/molecules27113422), 2022-05-25
Supplement: s1 [file s1]

# Supporting Information

## Synthesis of four orthogonally protected rare L-hexose thioglycosides from D-mannose by C-5 and C-4 epimerization

Fruzsina Demeter<sup>1</sup>, Ilona Bereczki<sup>1</sup>, Anikó Borbás<sup>1\*</sup> and Mihály Herczeg<sup>1,2\*</sup>

<sup>1</sup>*Department of Pharmaceutical Chemistry, University of Debrecen, Egyetem tér 1, H-4032 Debrecen, Hungary.*

<sup>2</sup>*Research Group for Oligosaccharide Chemistry of Hungarian Academy of Sciences, ELKH, Egyetem tér 1, H-4032 Debrecen, Hungary.*

E-mail: borbas.aniko@pharm.unideb.hu; herczeg.mihaly@pharm.unideb.hu

### Table of Contents

|                                                                             |     |
|-----------------------------------------------------------------------------|-----|
| <sup>1</sup> H and <sup>13</sup> C NMR spectra of the synthesized compounds | 1   |
| X-ray structure analysis of compound 83                                     | 129 |

$^1\text{H}$  and  $^{13}\text{C}$  NMR spectra of compound **24**

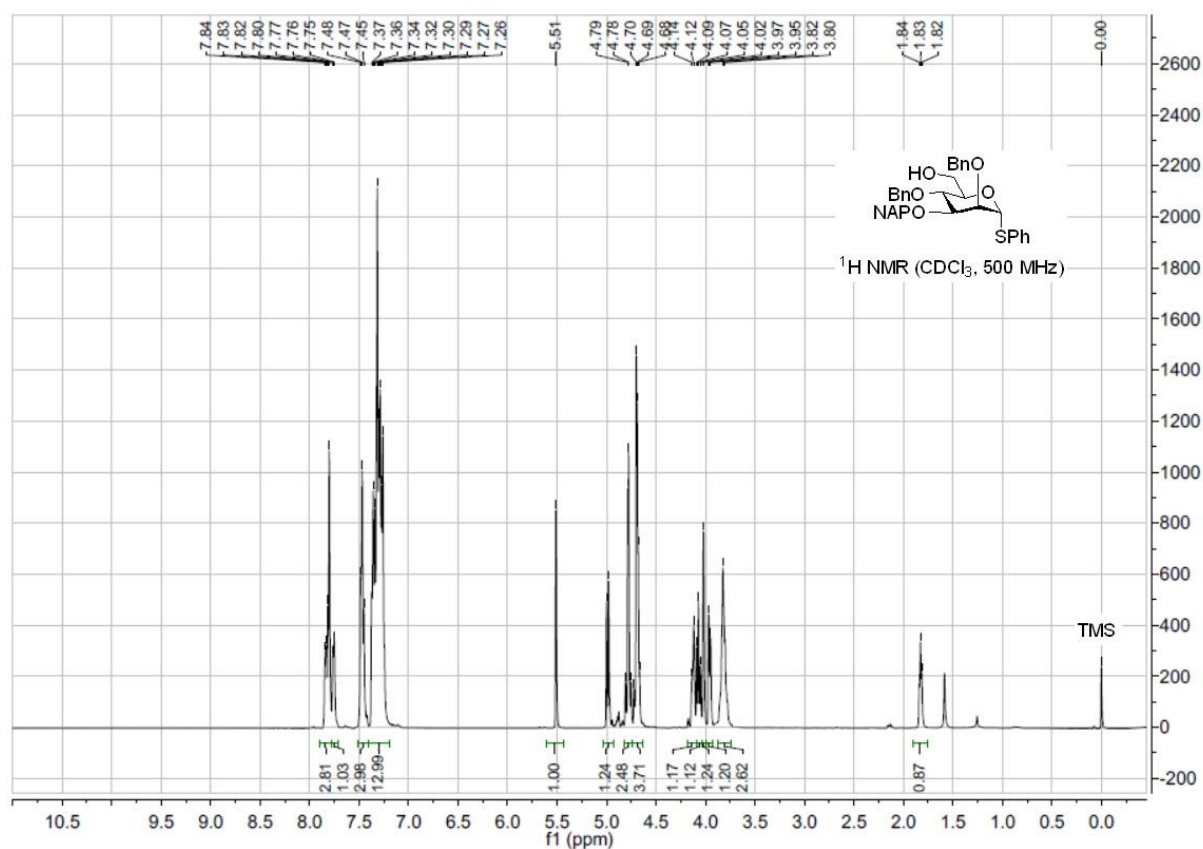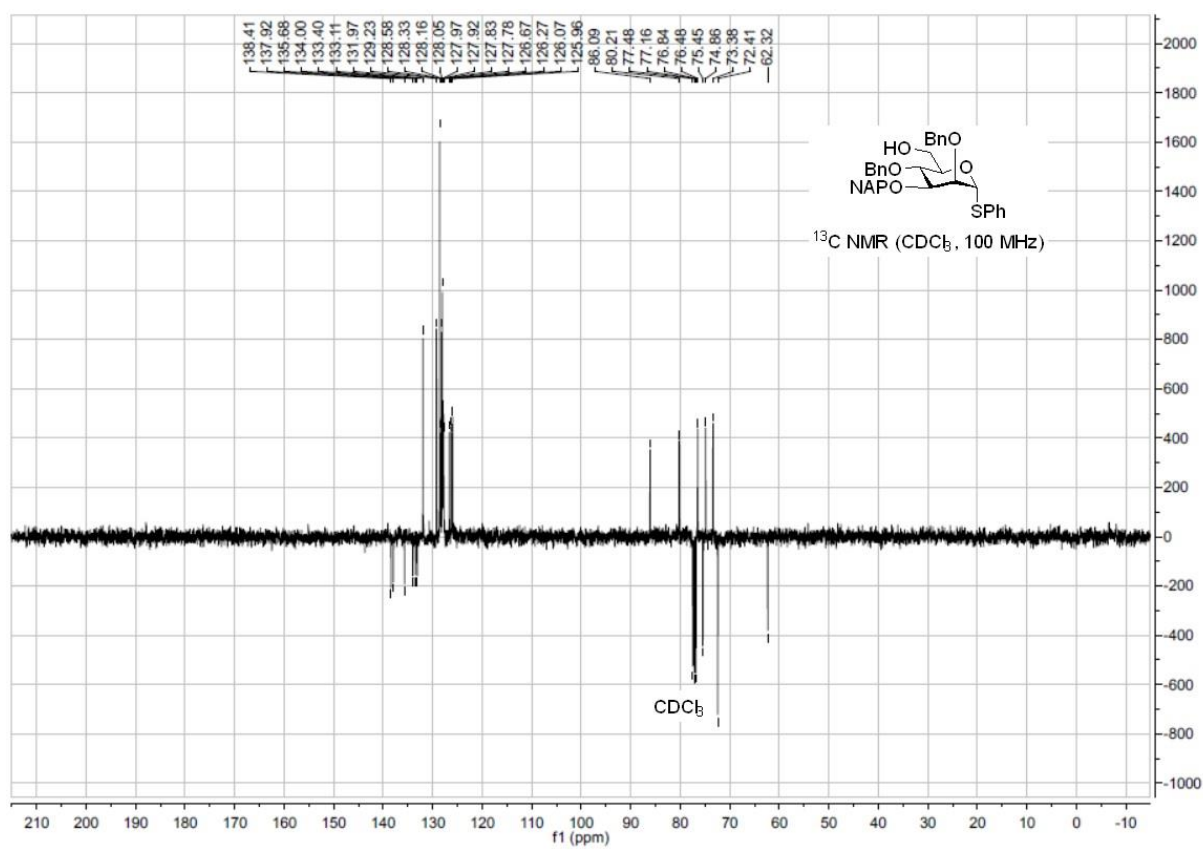

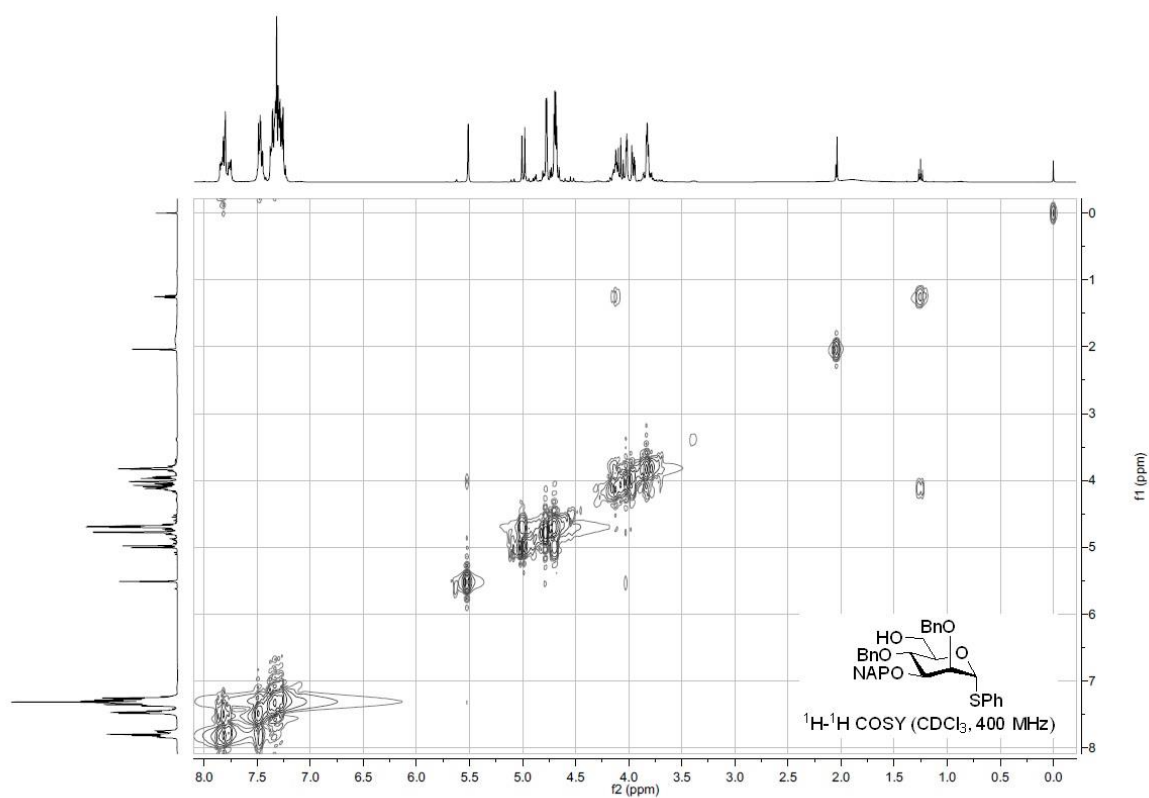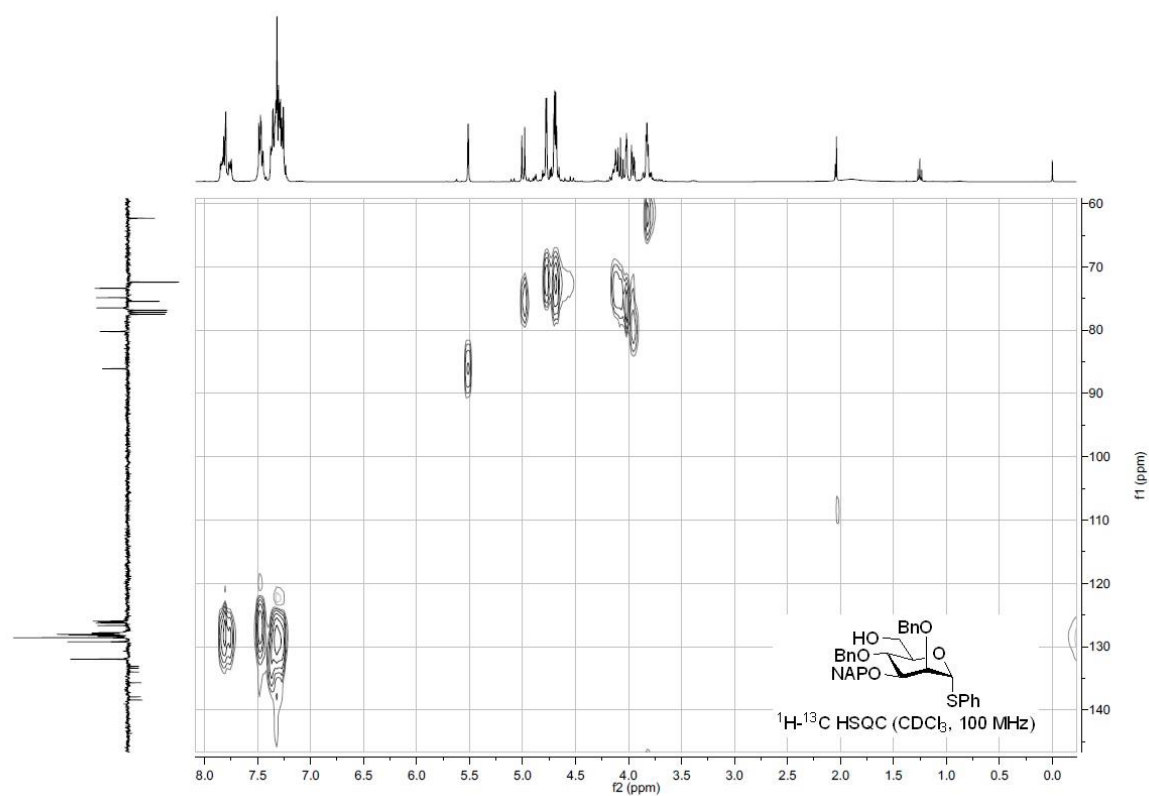

<sup>1</sup>H and <sup>13</sup>C NMR spectra of compound **25**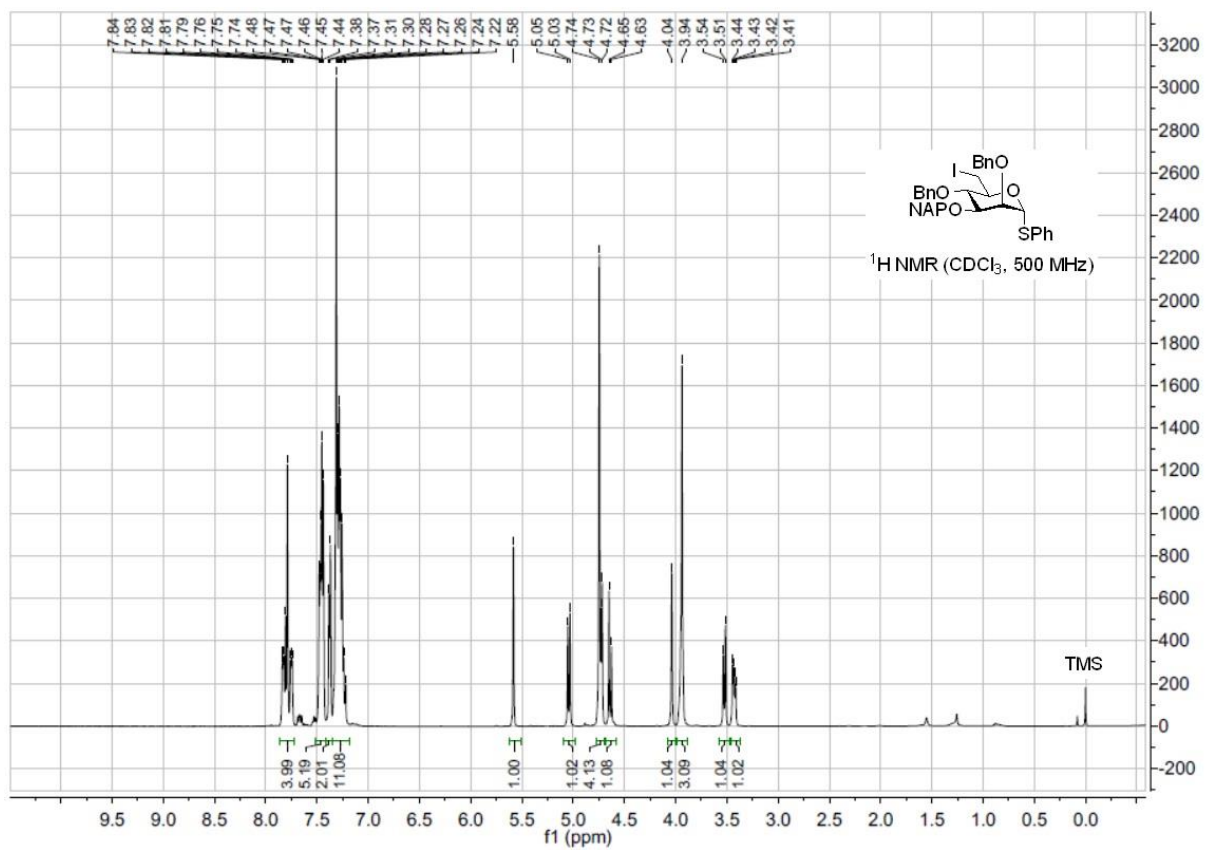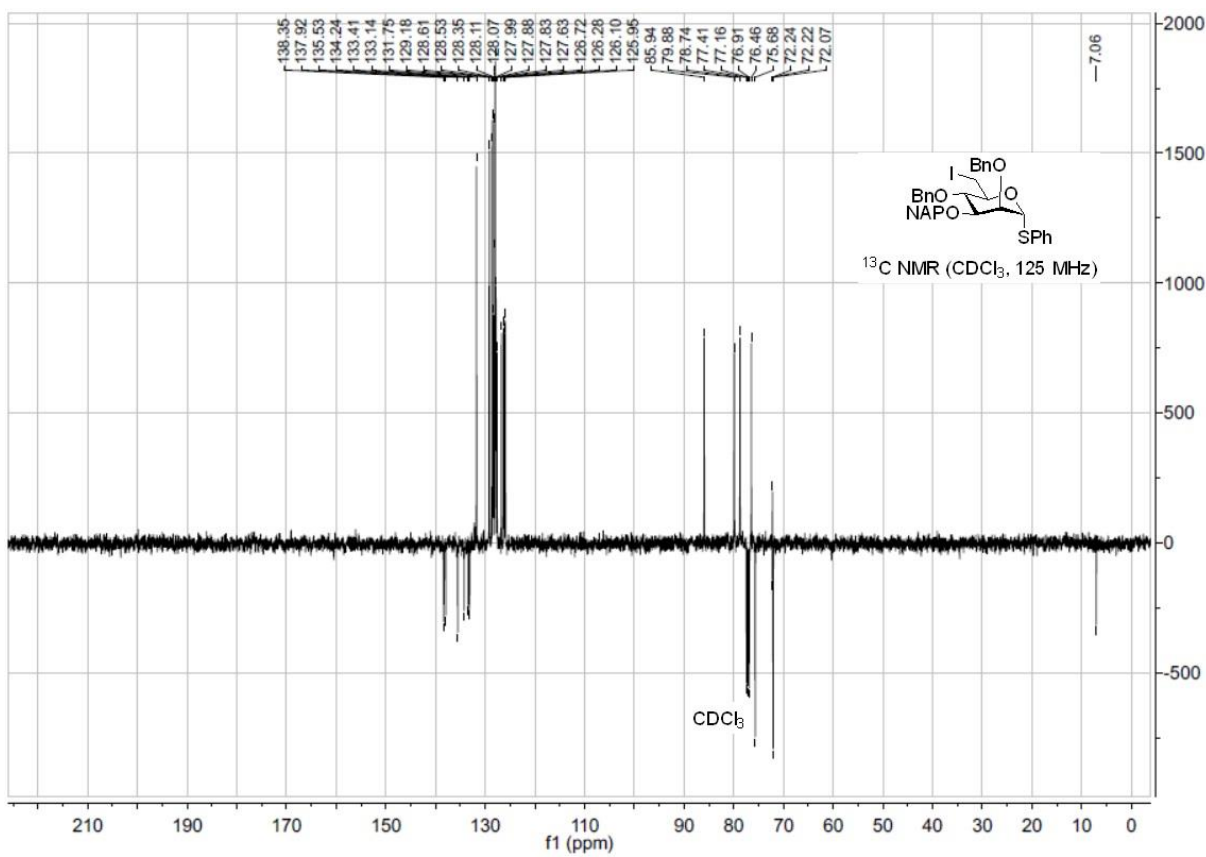



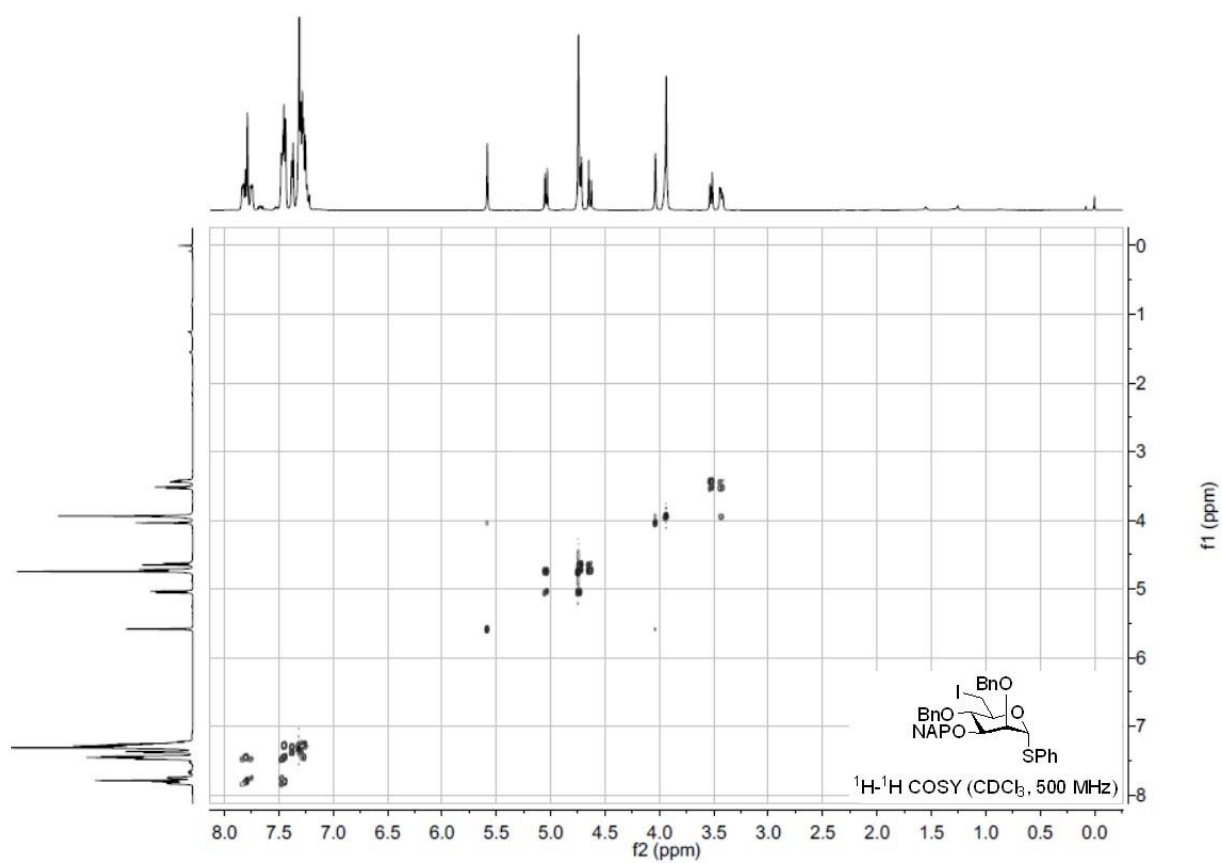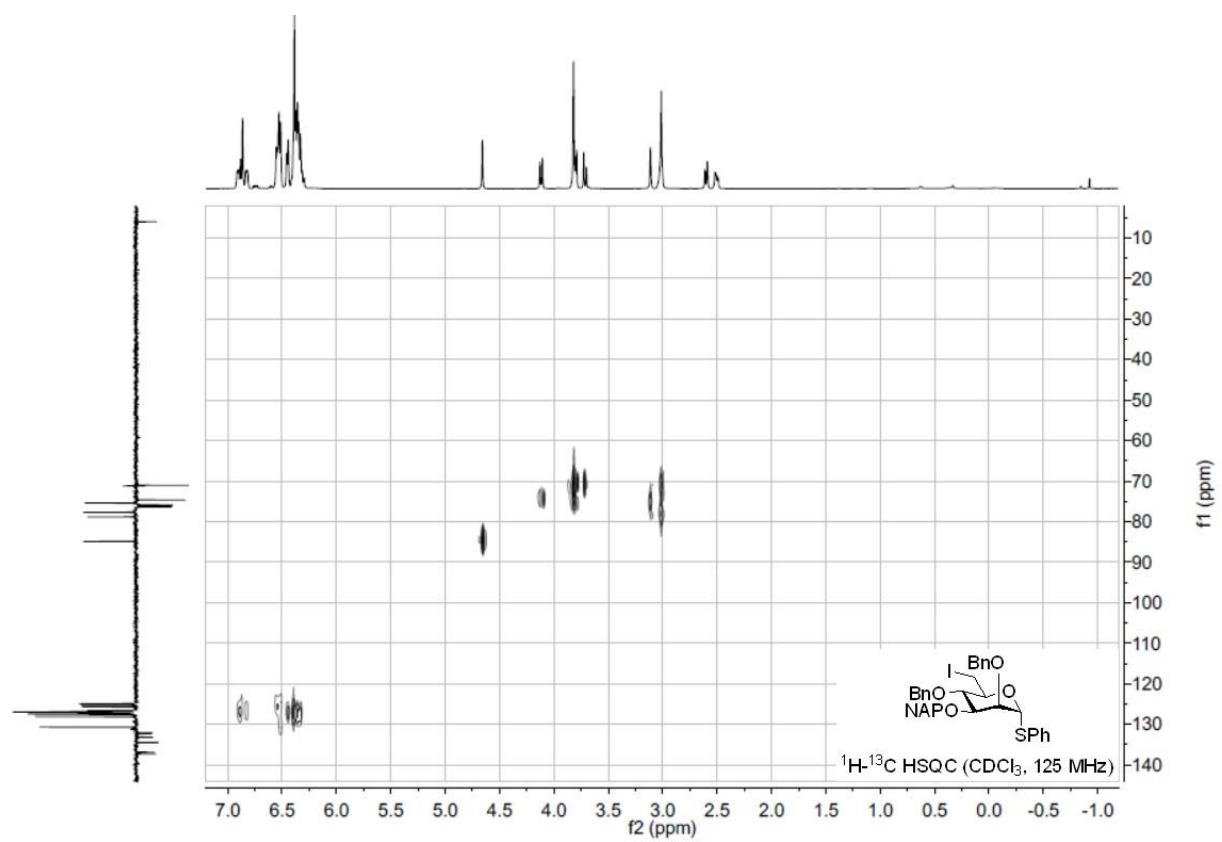

$^1\text{H}$  and  $^{13}\text{C}$  NMR spectra of compound **26**

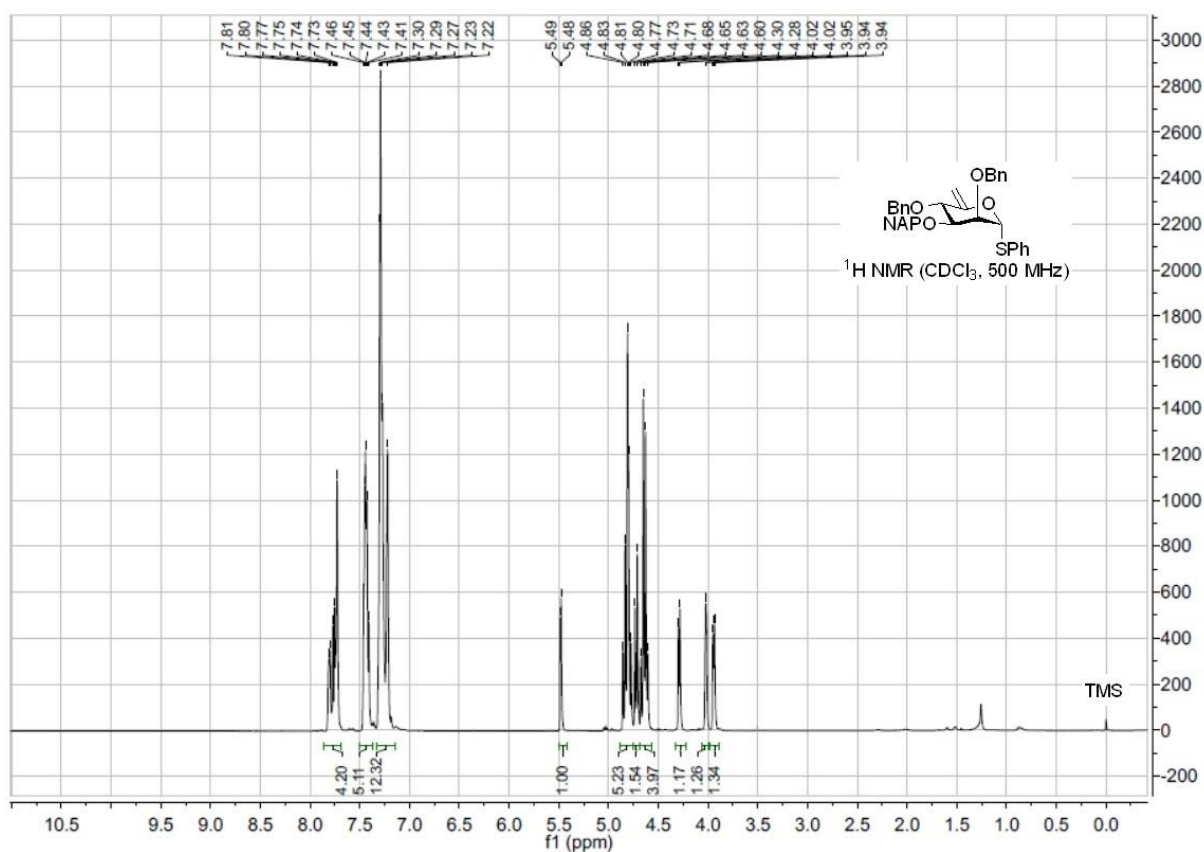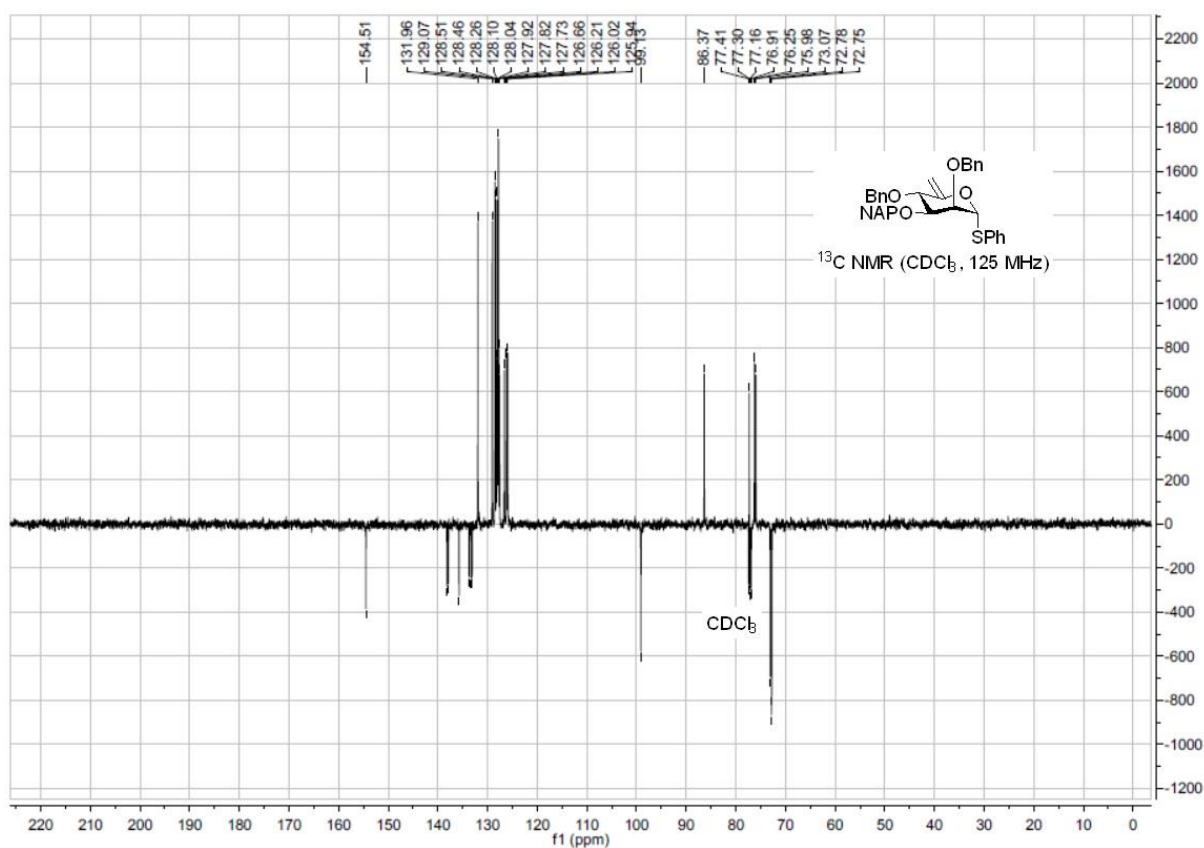

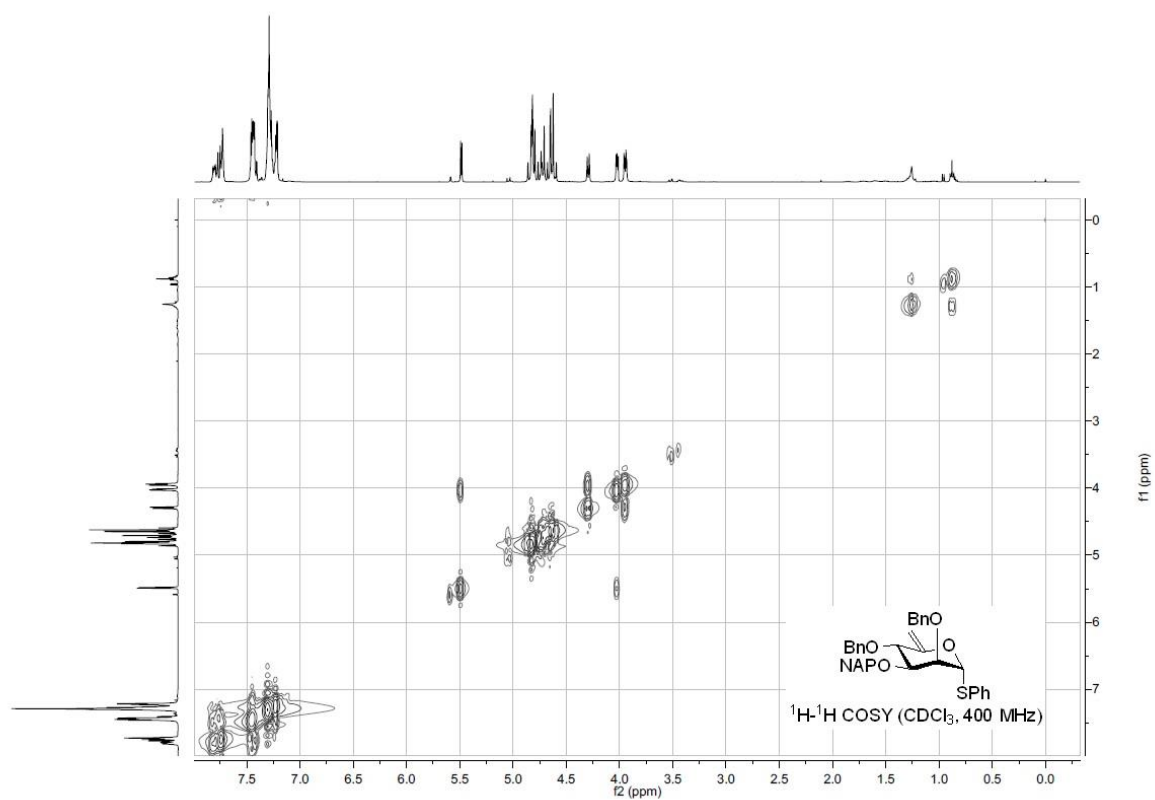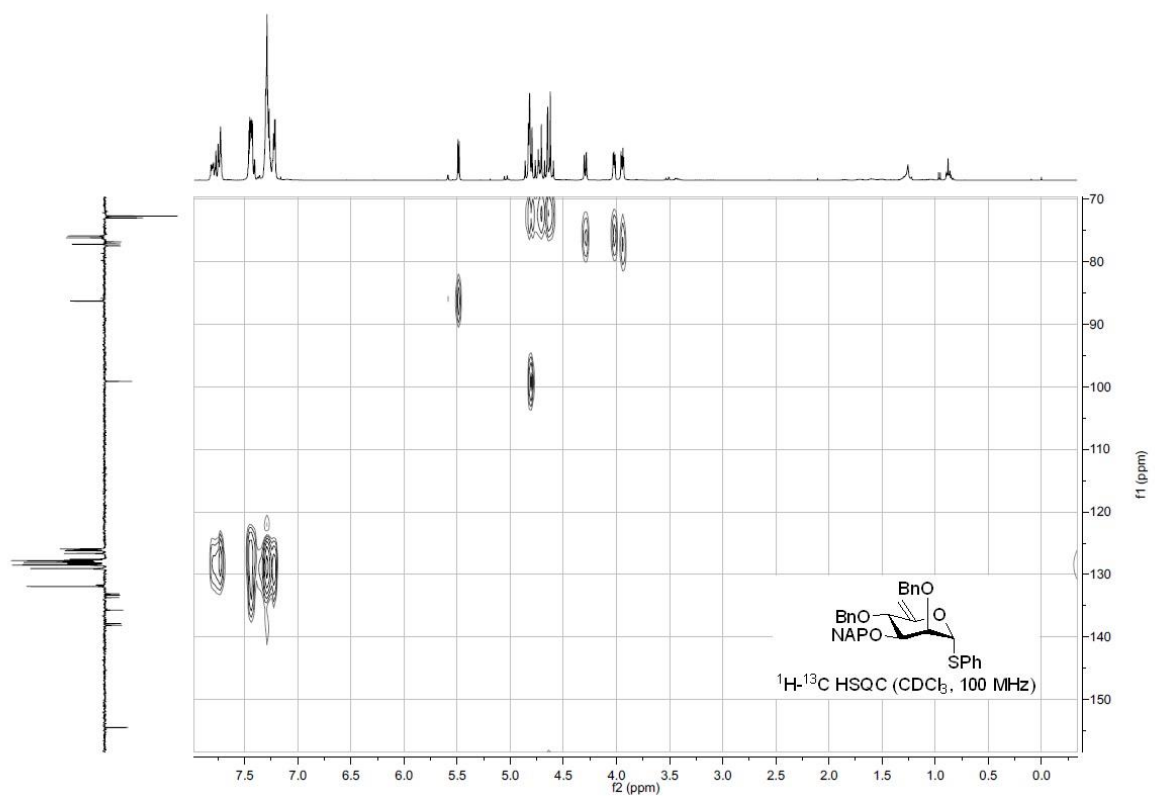

$^1\text{H}$  and  $^{13}\text{C}$  NMR spectra of compound 27

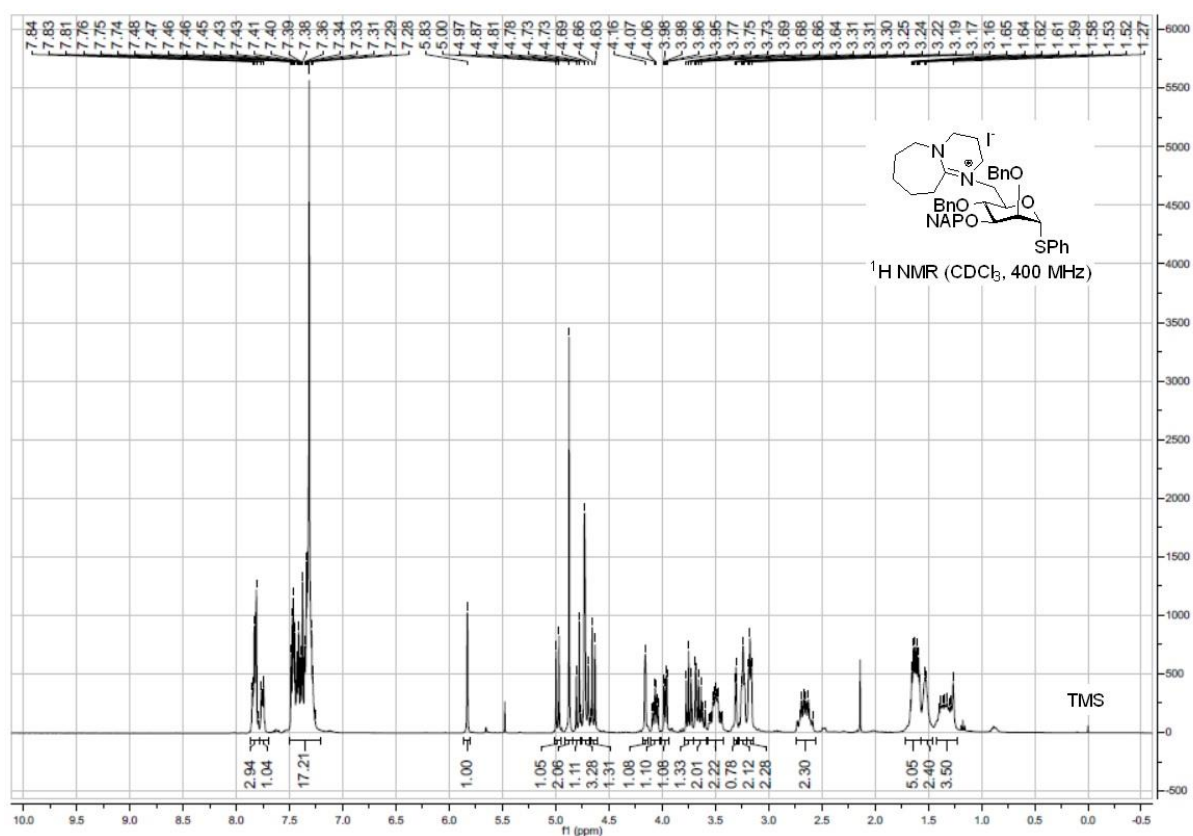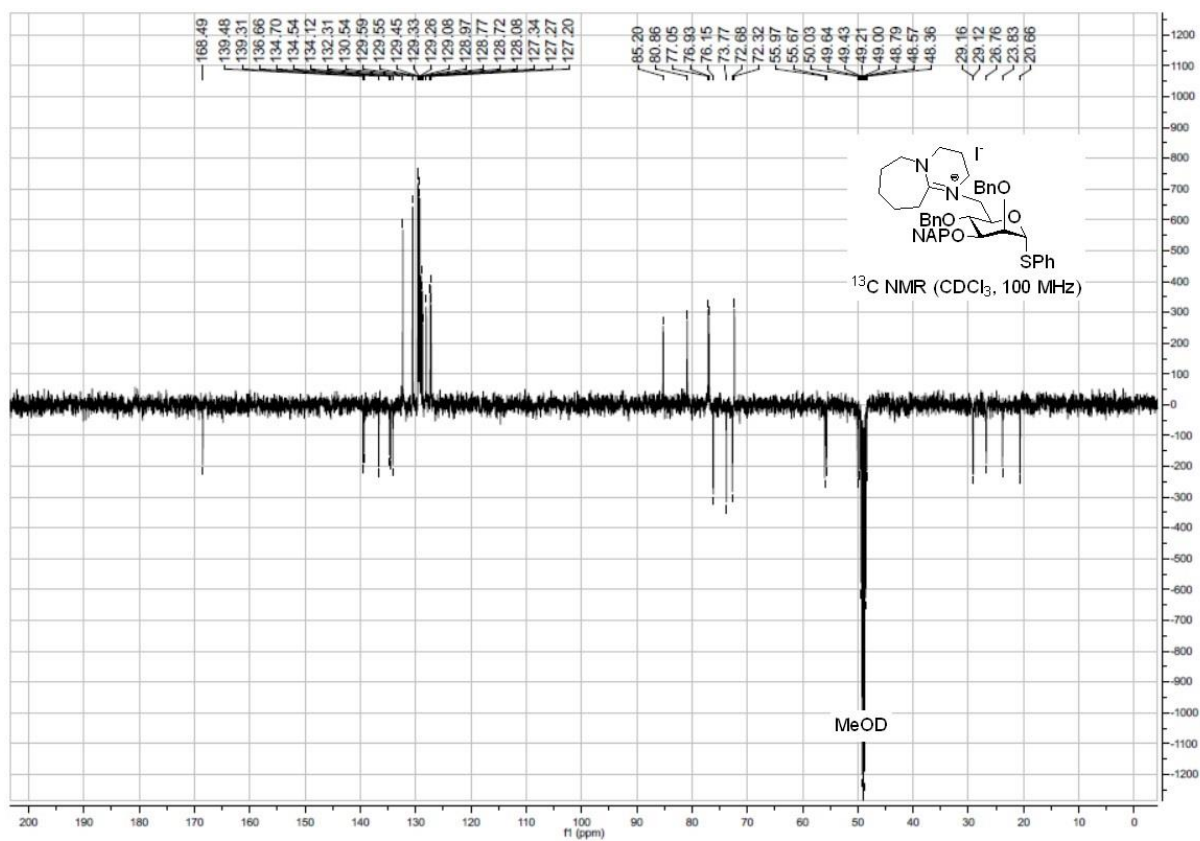



$^1\text{H}$  and  $^{13}\text{C}$  NMR spectra of compound **28**

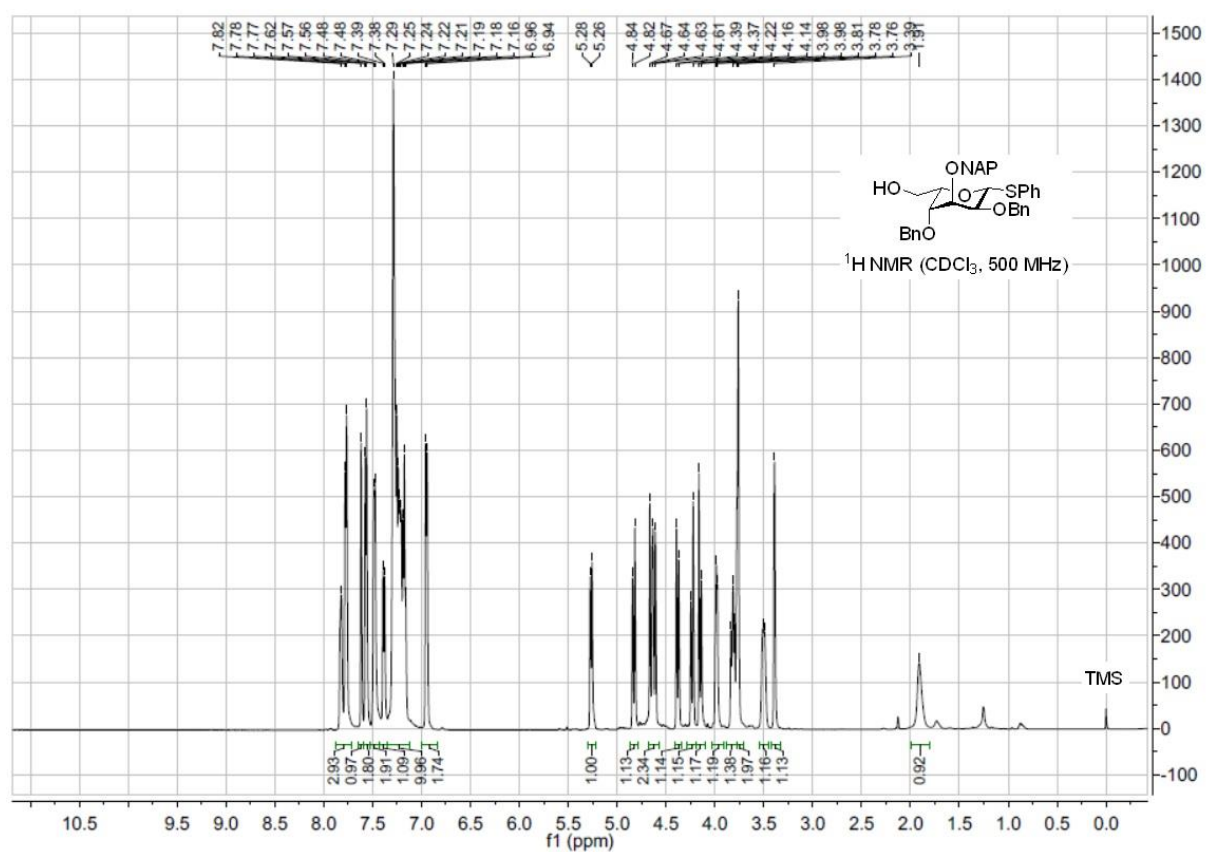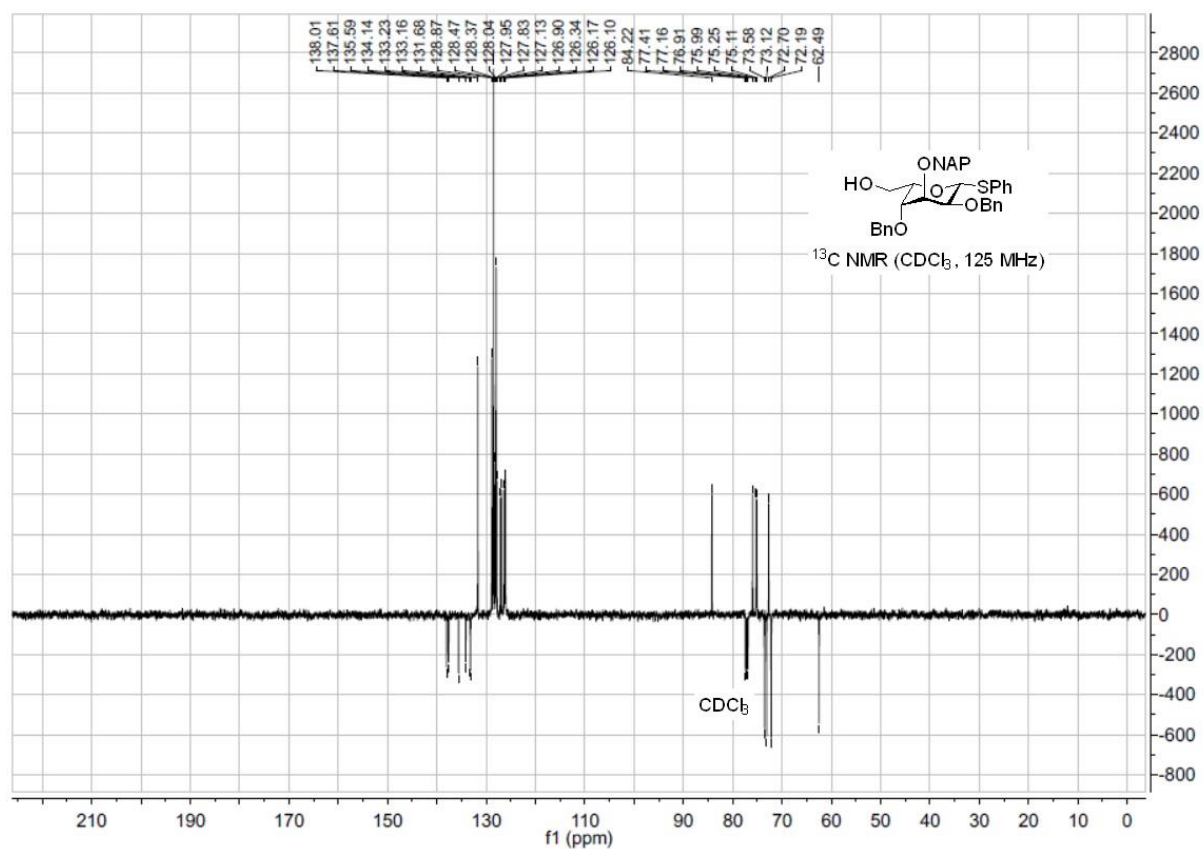

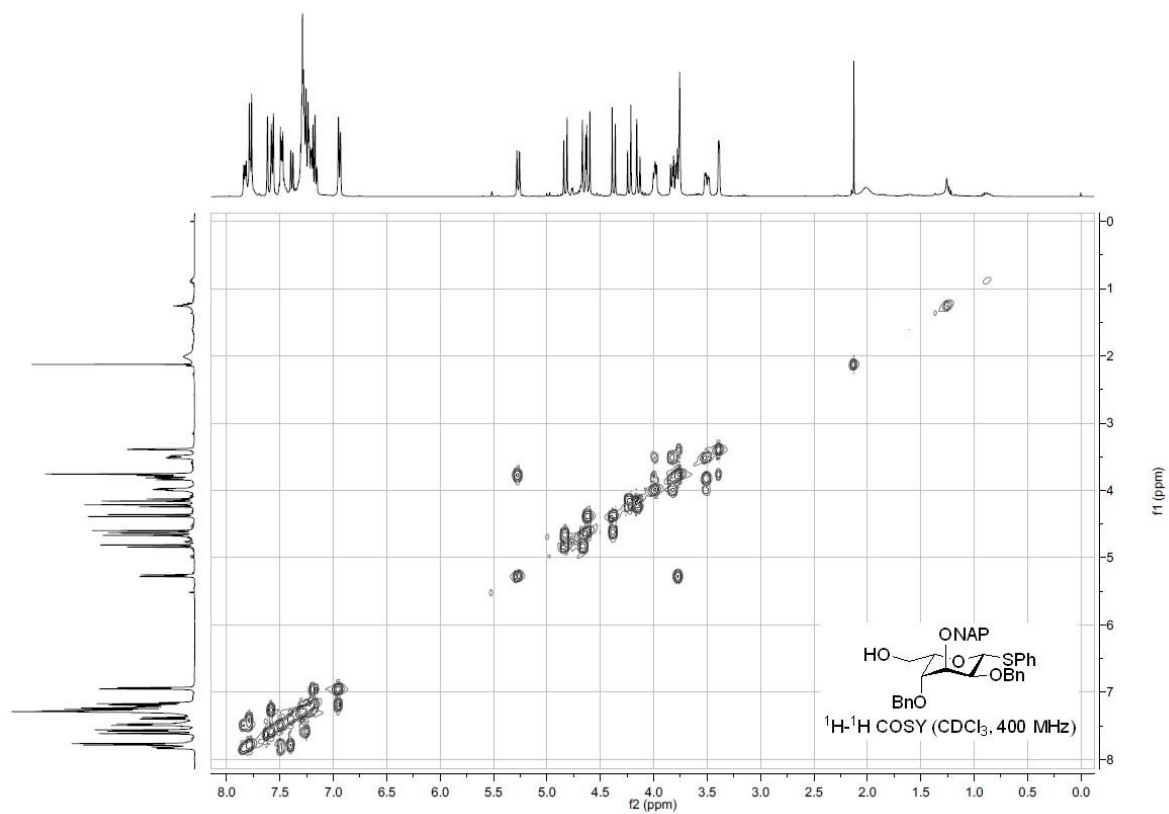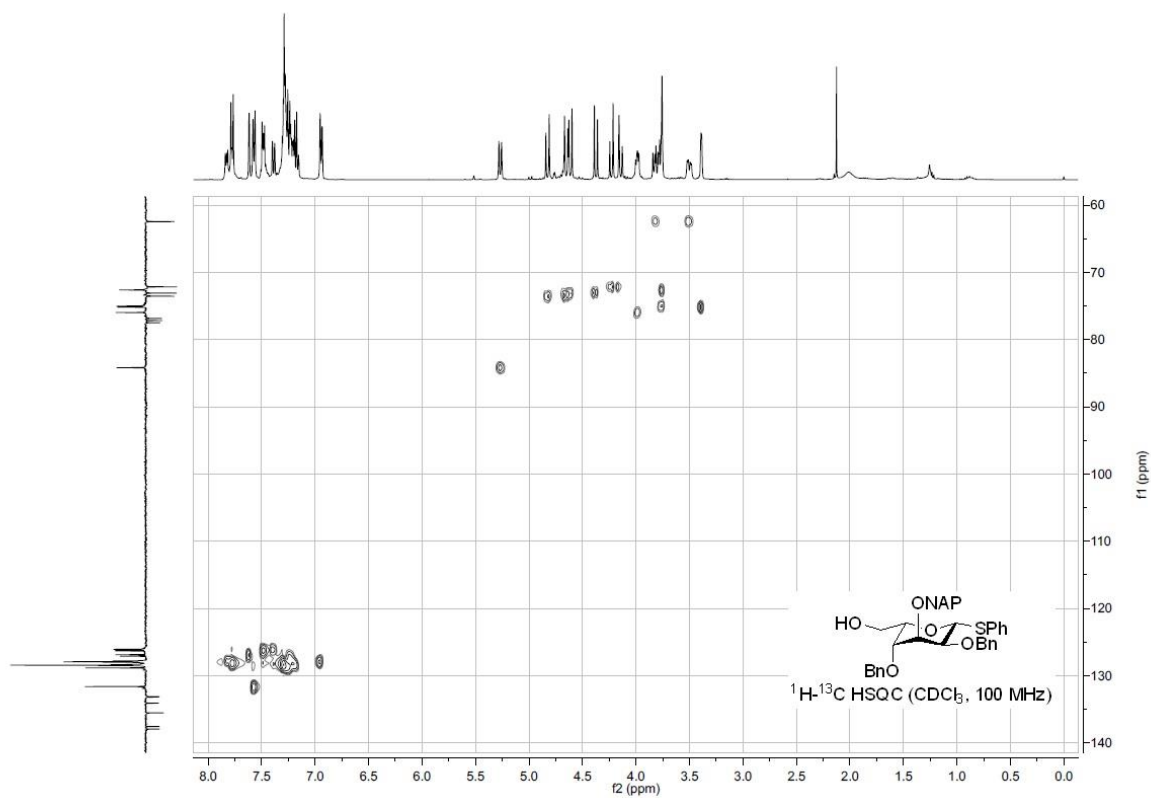



$^1\text{H}$  and  $^{13}\text{C}$  NMR spectra of compound **30**

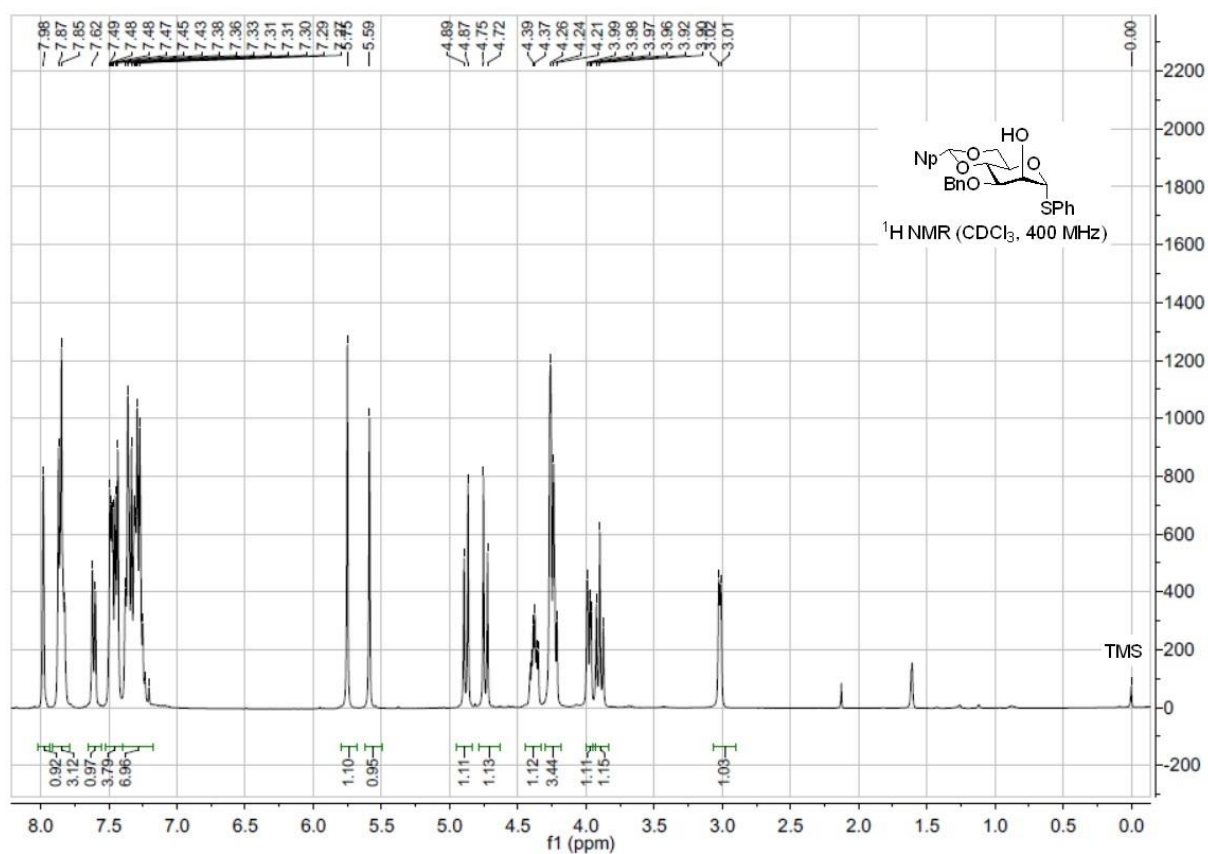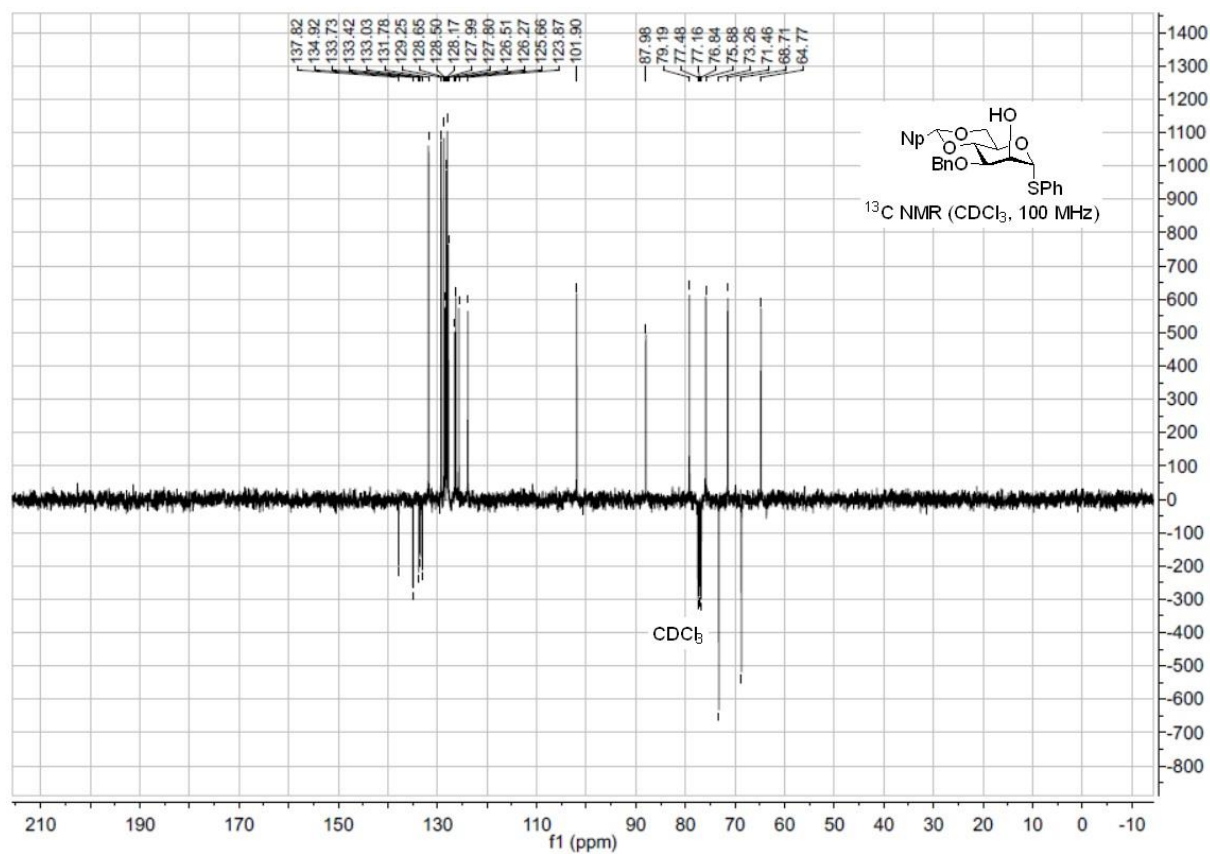



$^1\text{H}$  and  $^{13}\text{C}$  NMR spectra of compound **31**

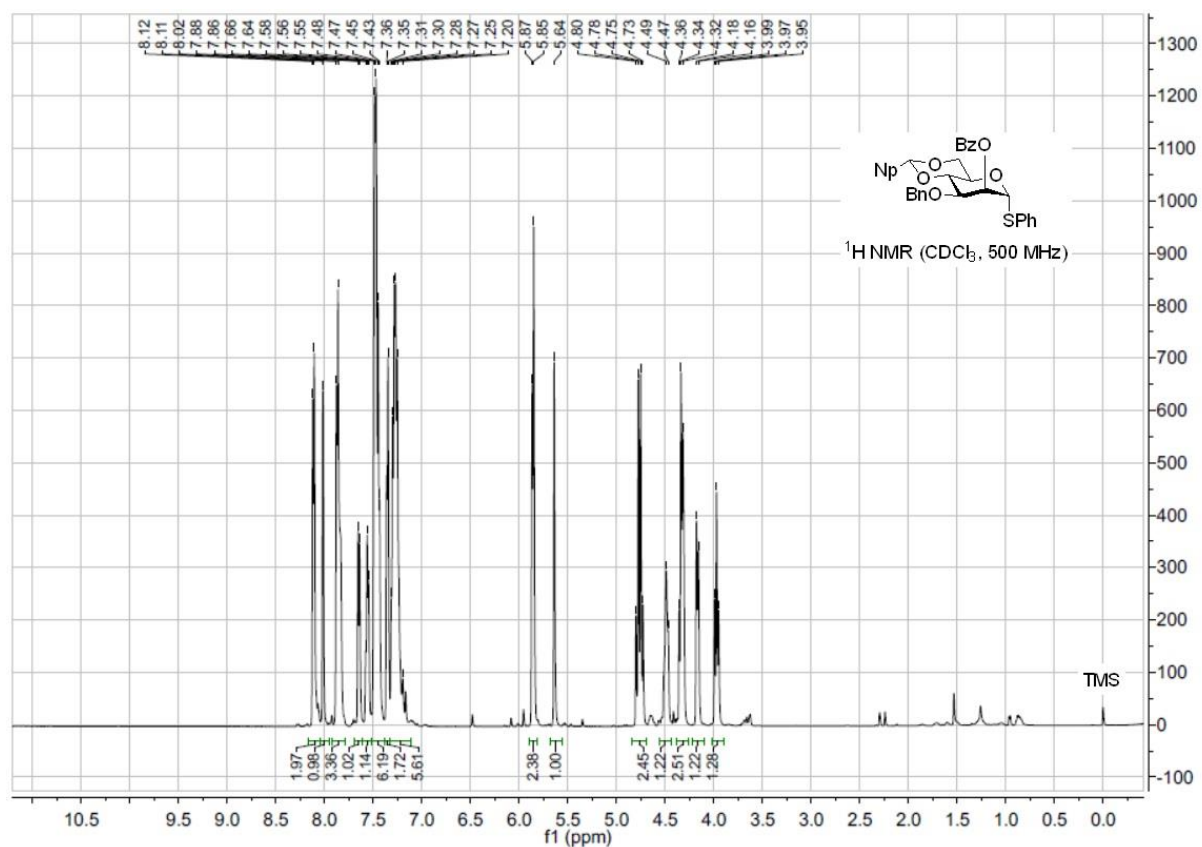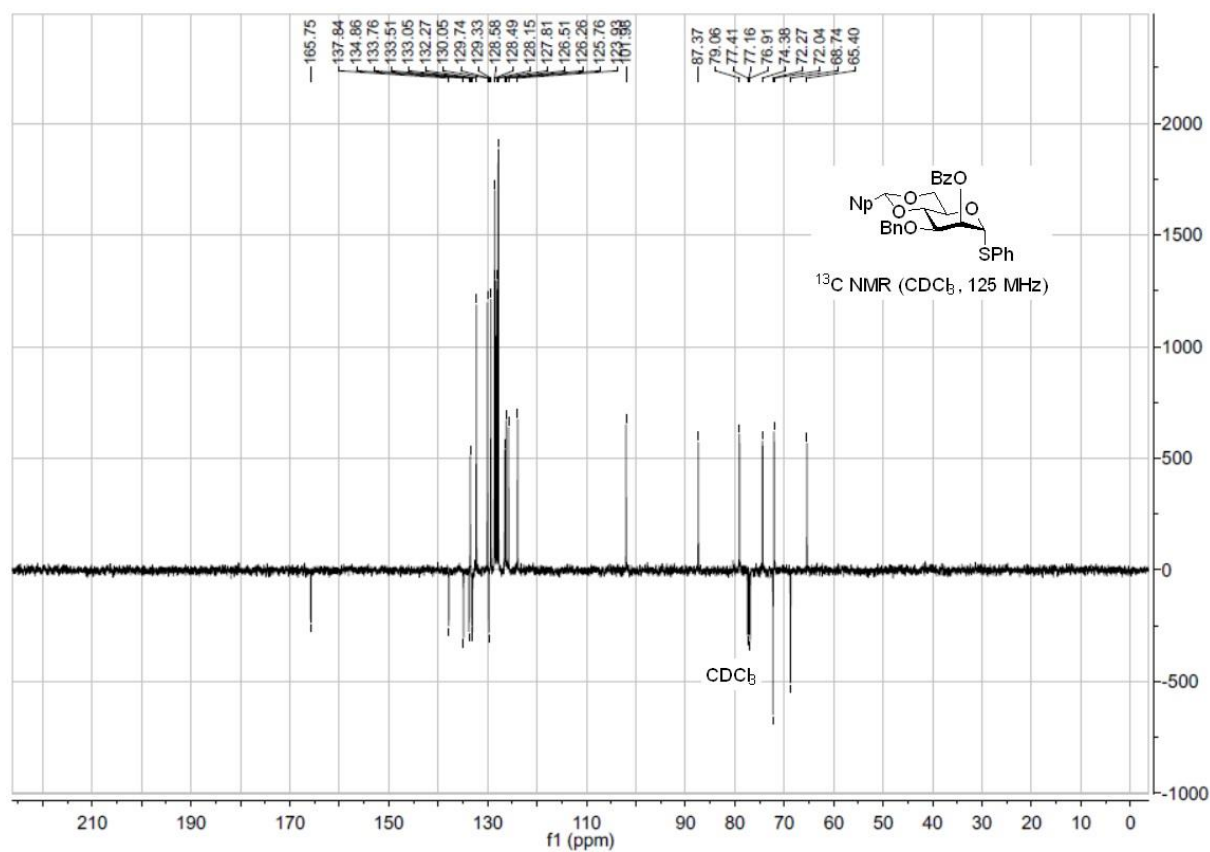

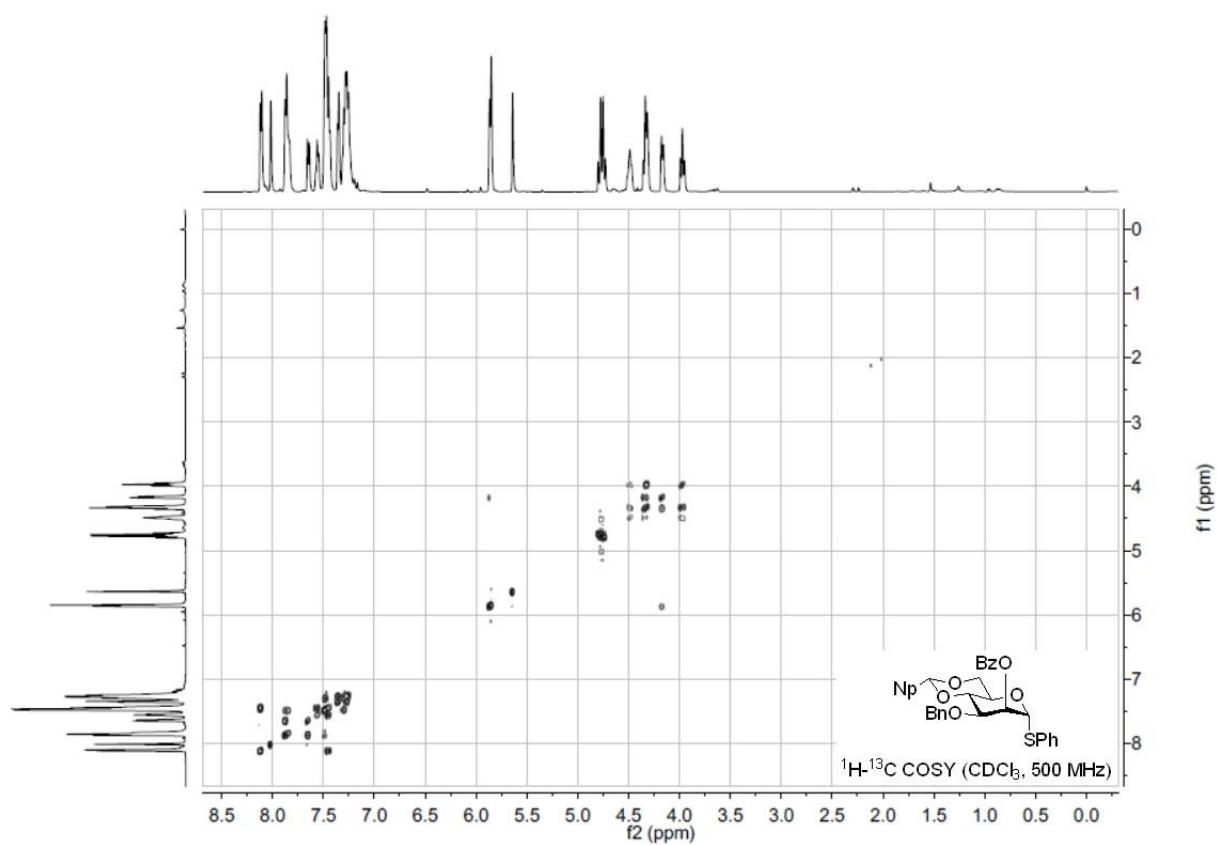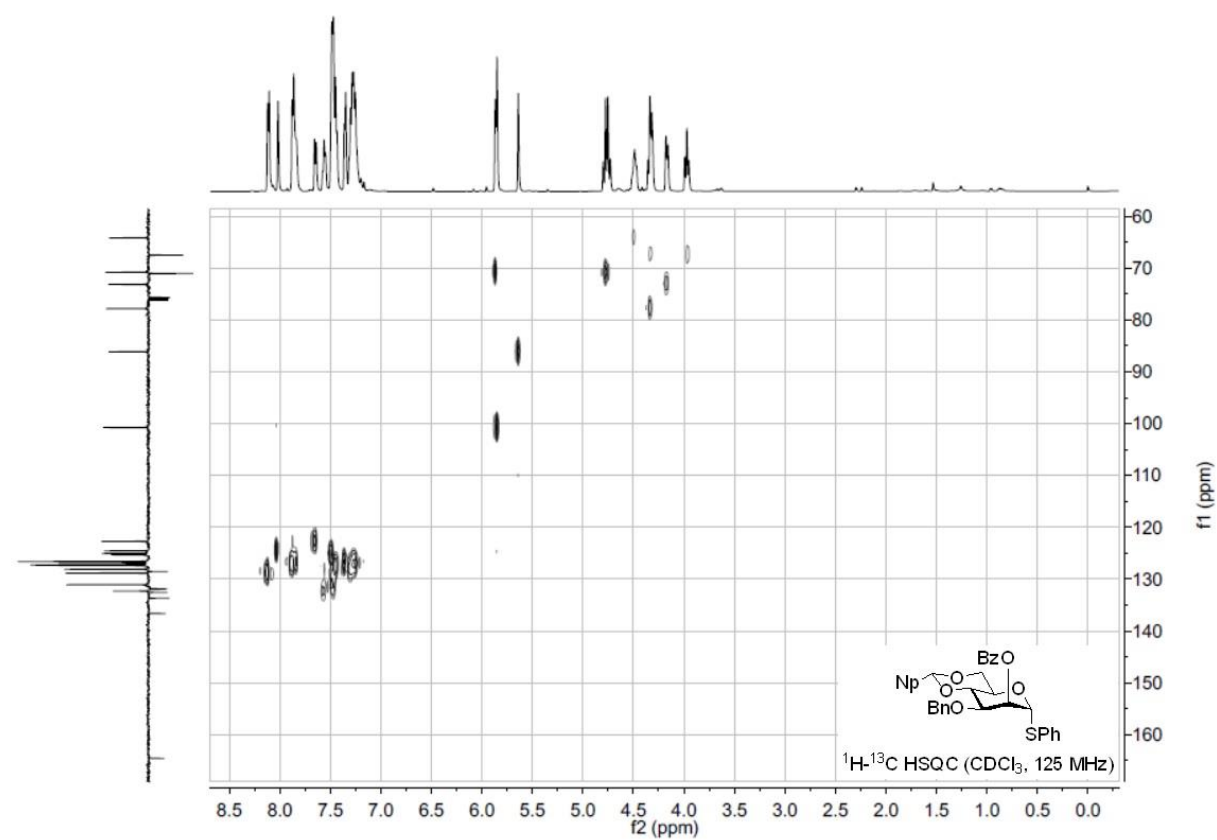

$^1\text{H}$  and  $^{13}\text{C}$  NMR spectra of compound **32**

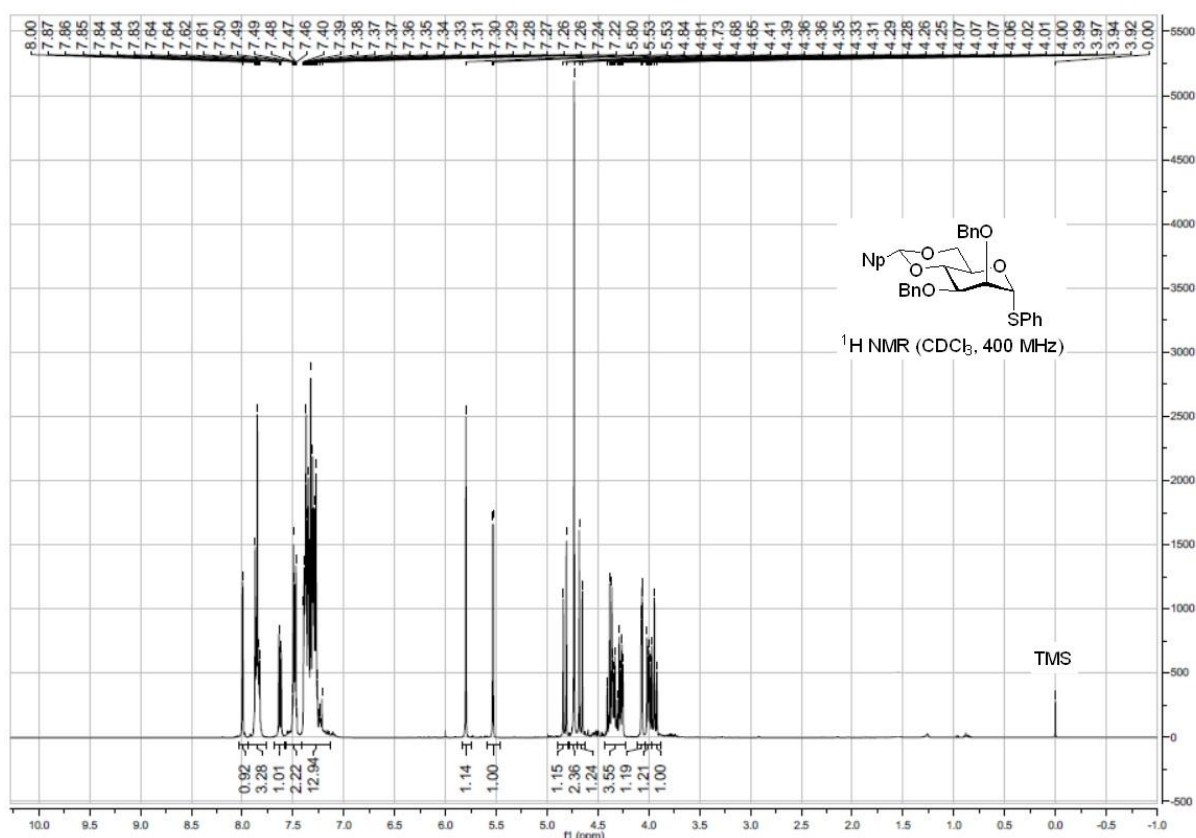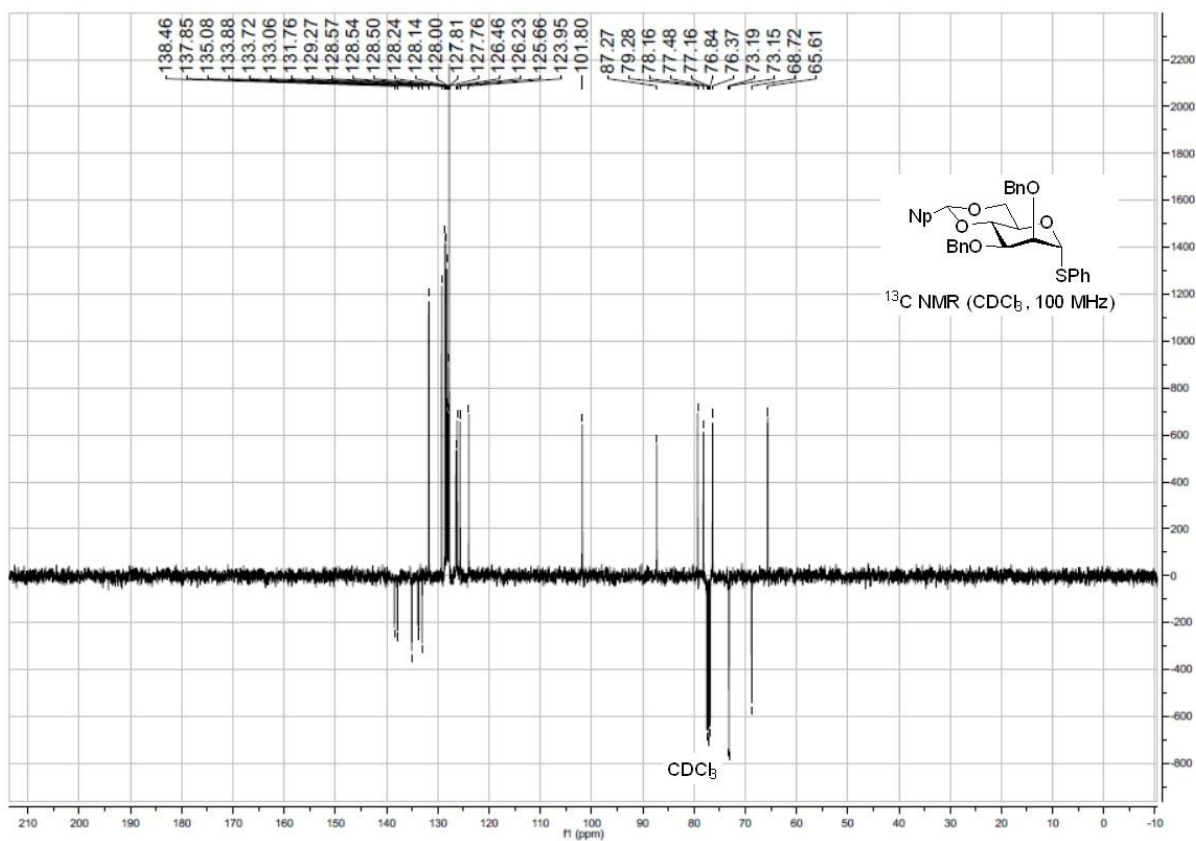

$^1\text{H}$  and  $^{13}\text{C}$  NMR spectra of compound **33**

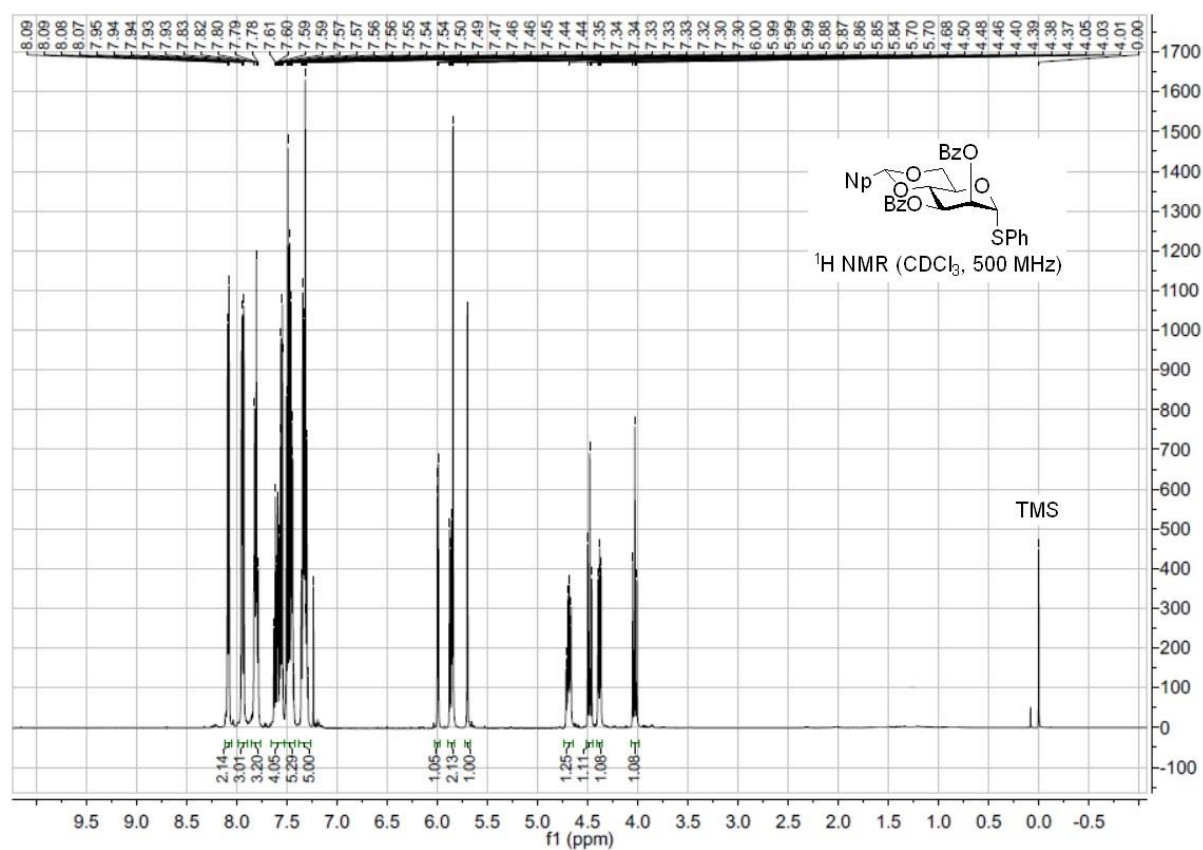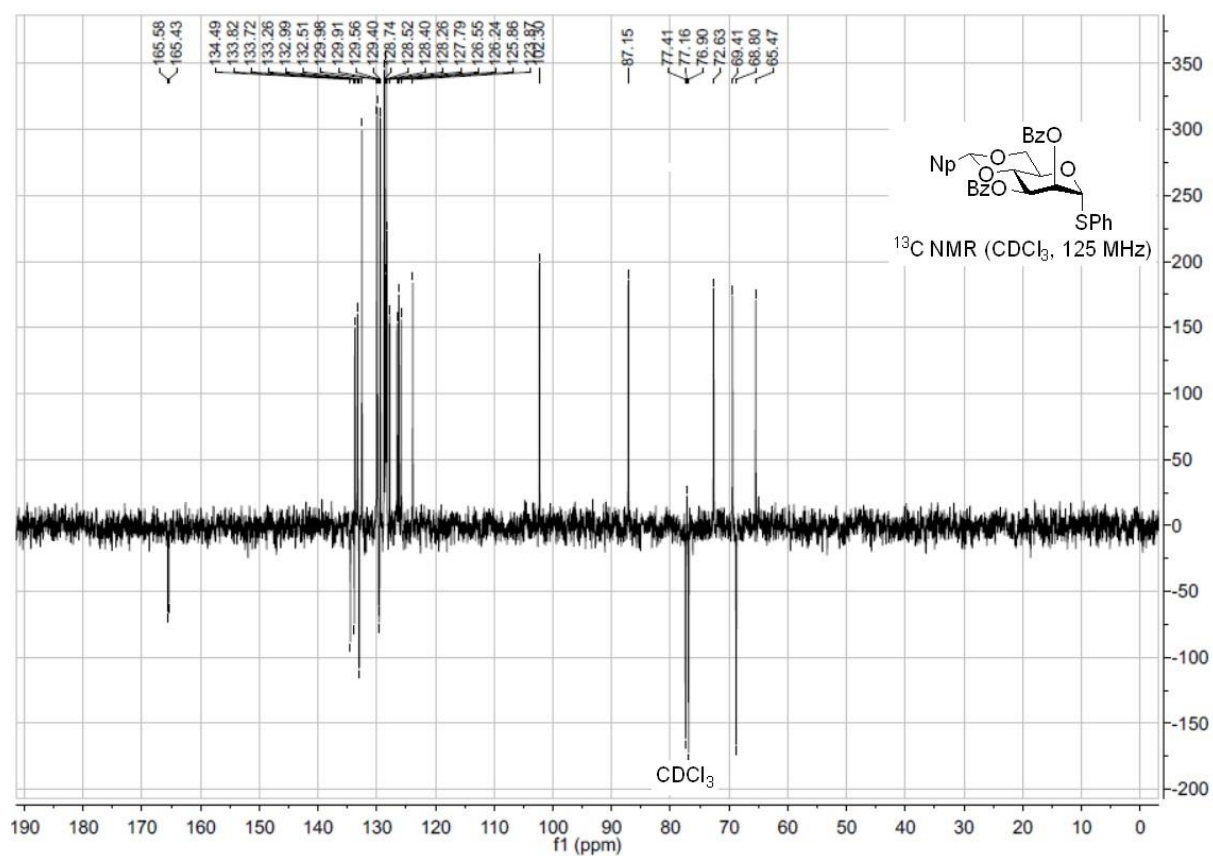

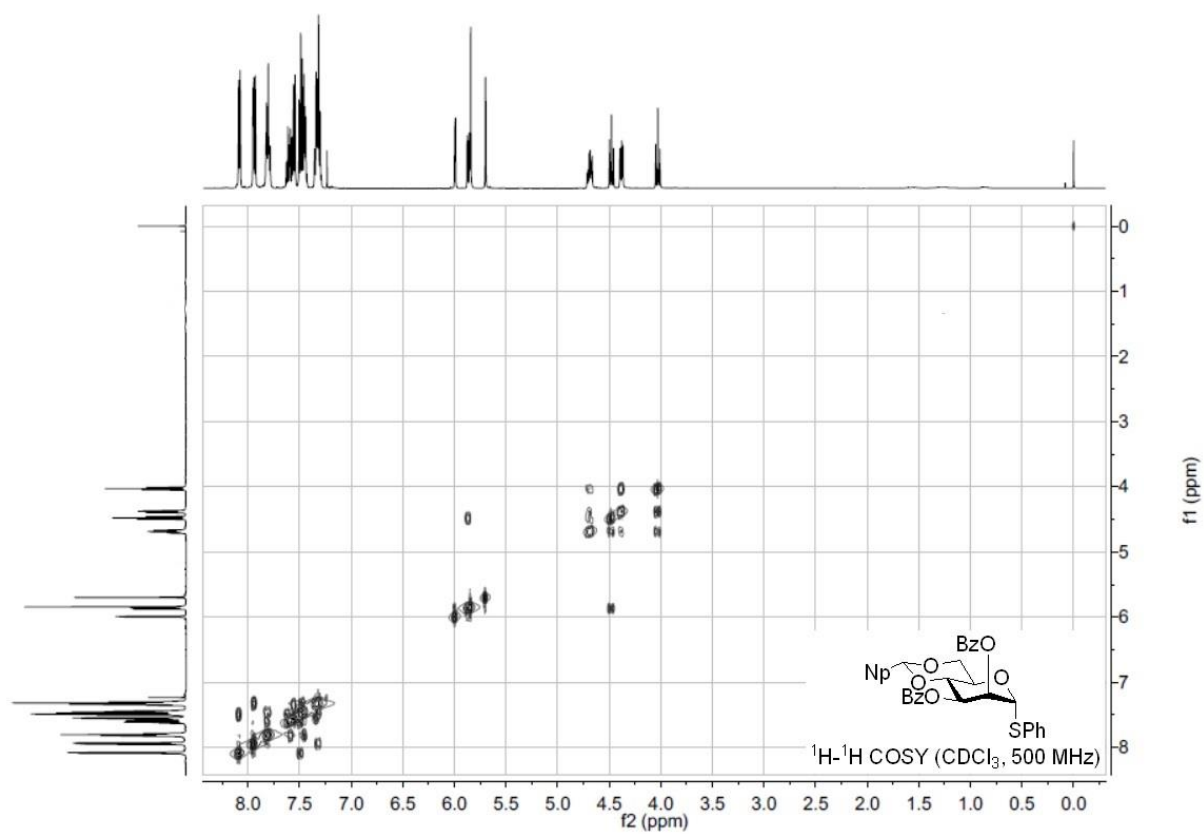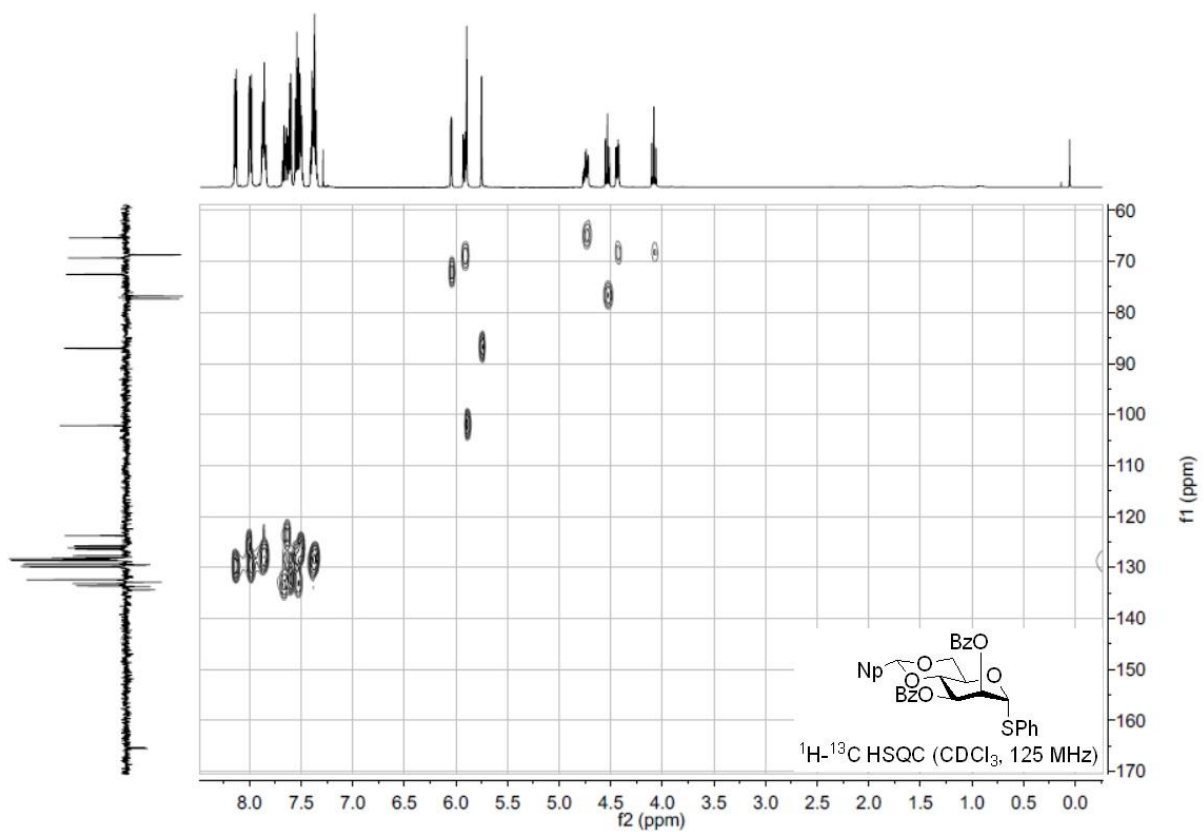

$^1\text{H}$  and  $^{13}\text{C}$  NMR spectra of compound **34**

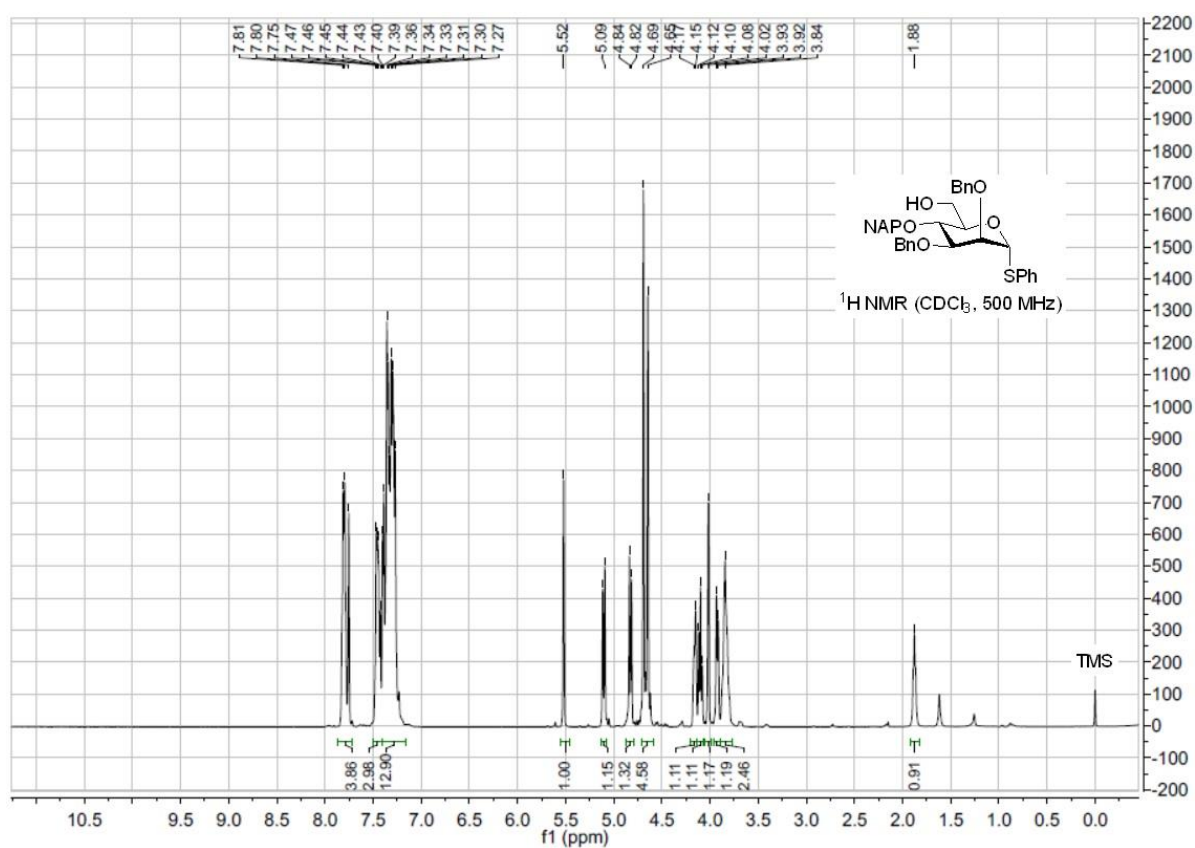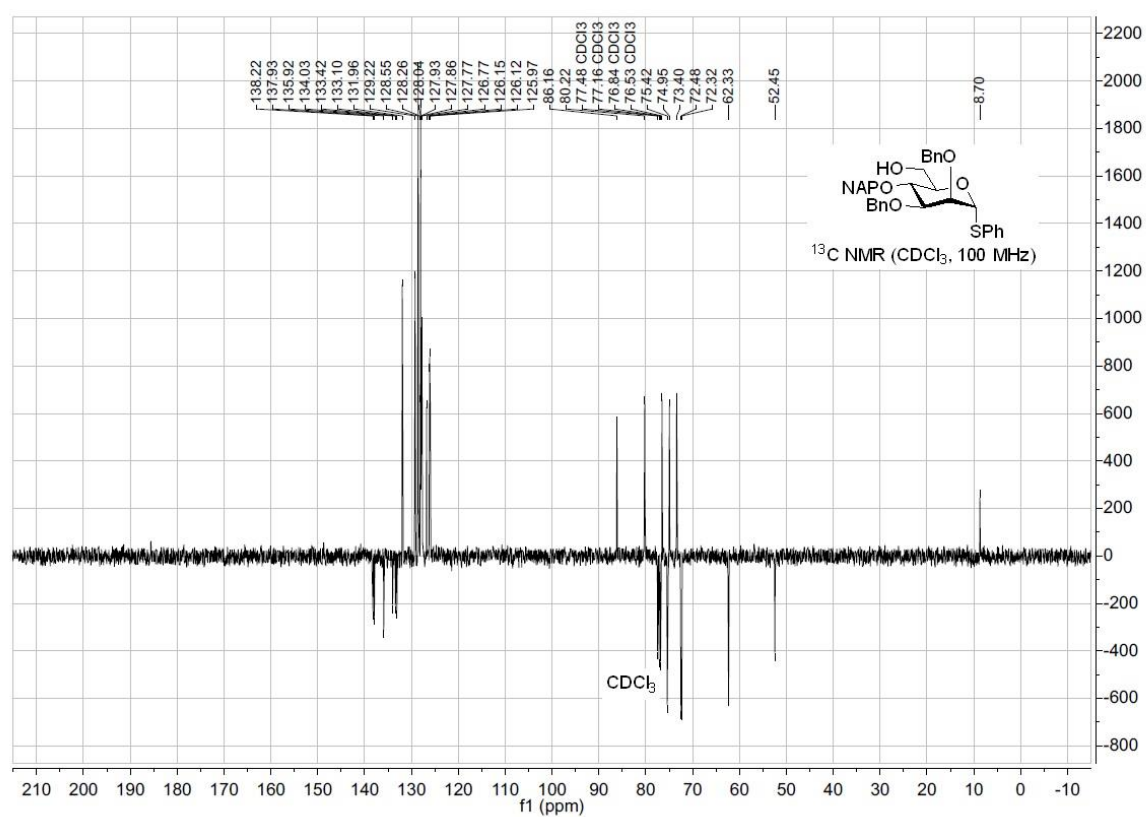

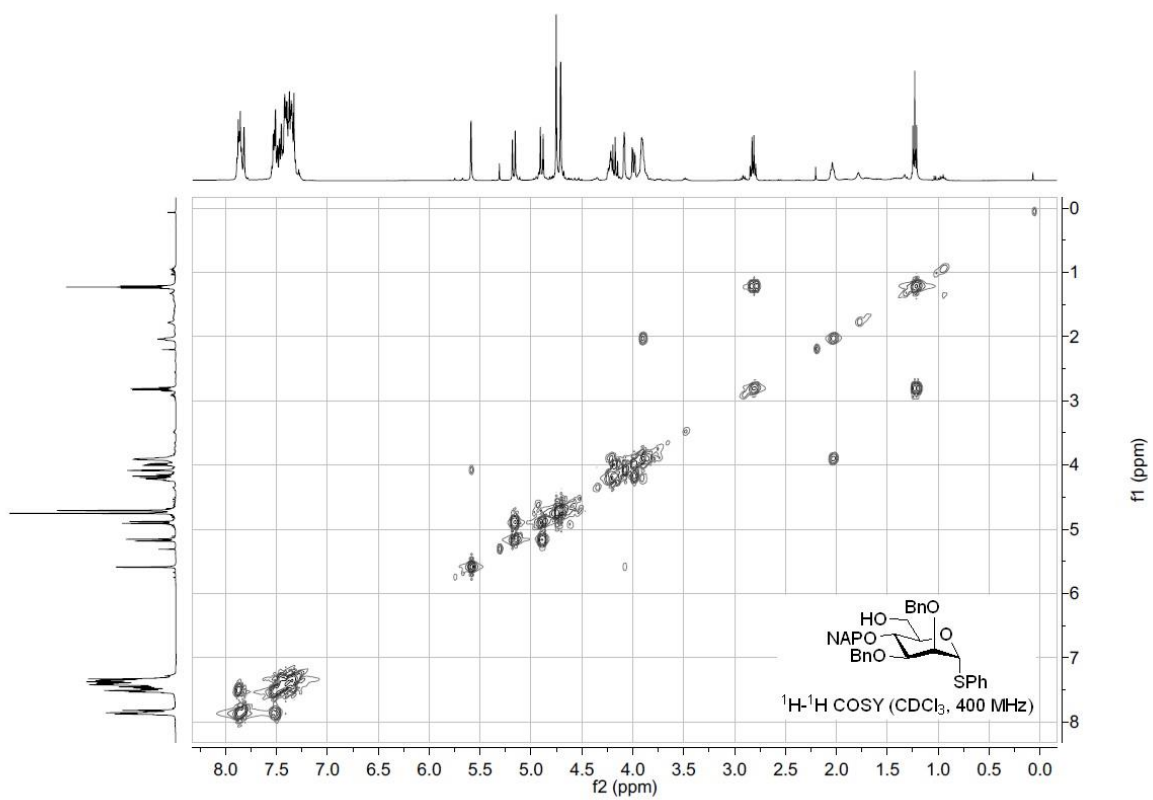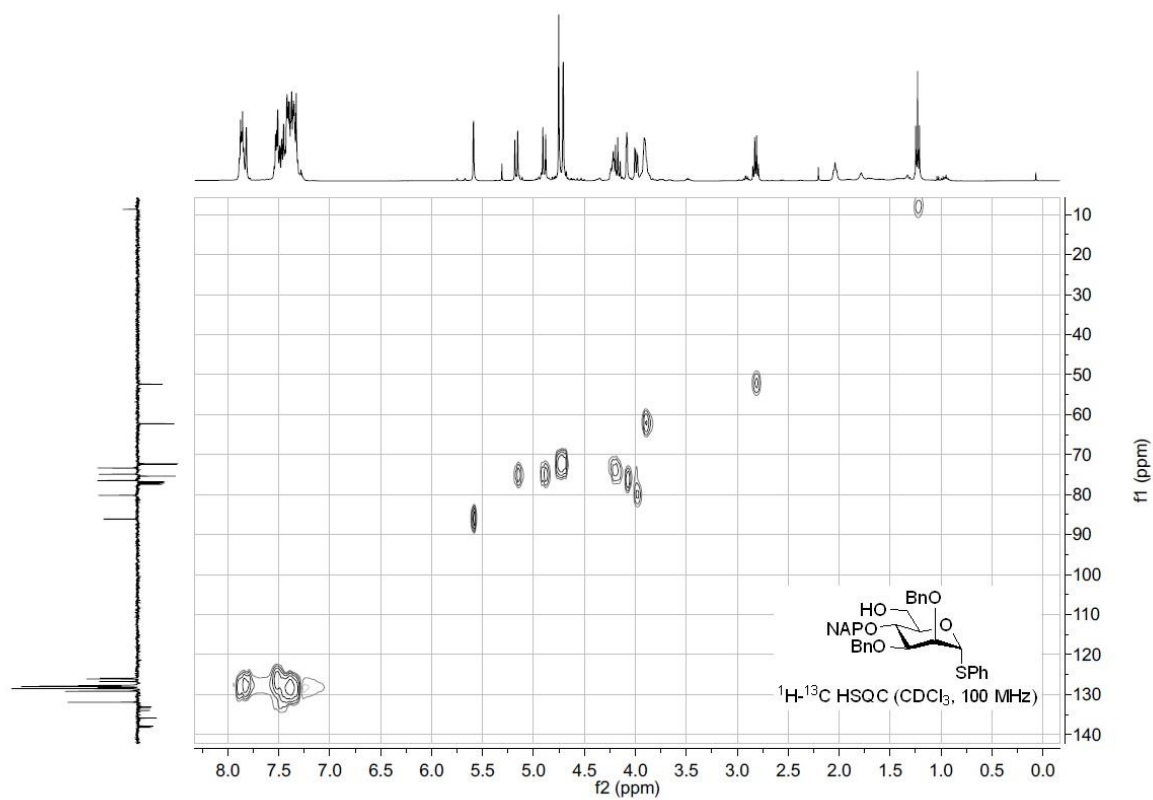



$^1\text{H}$  and  $^{13}\text{C}$  NMR spectra of compound 35

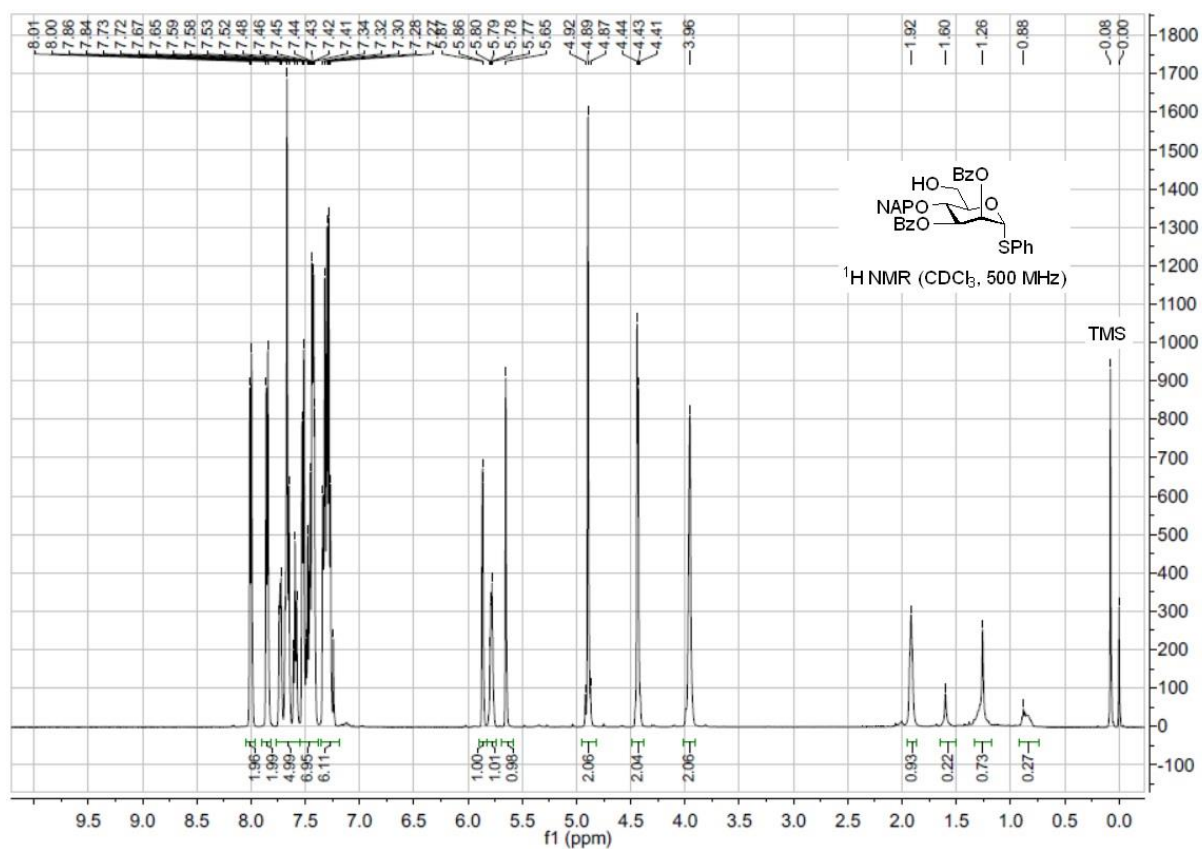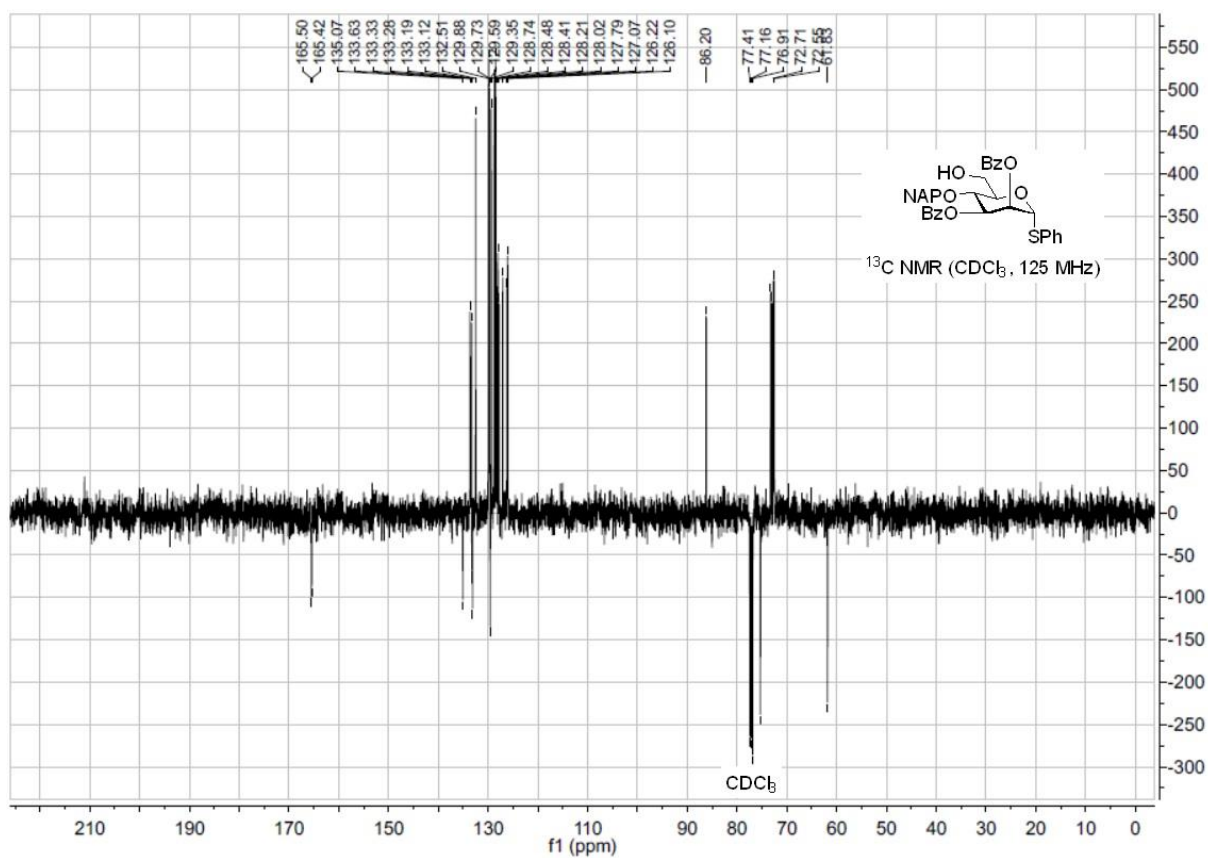



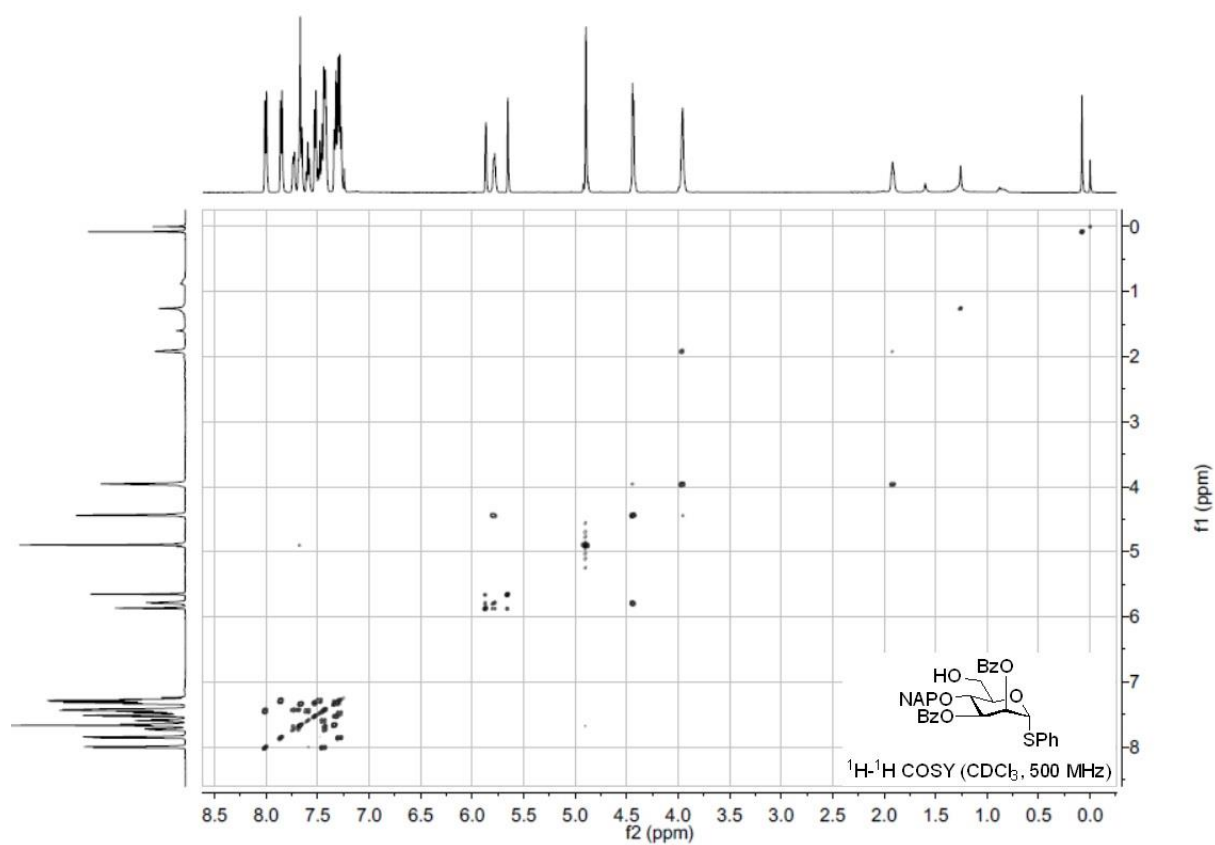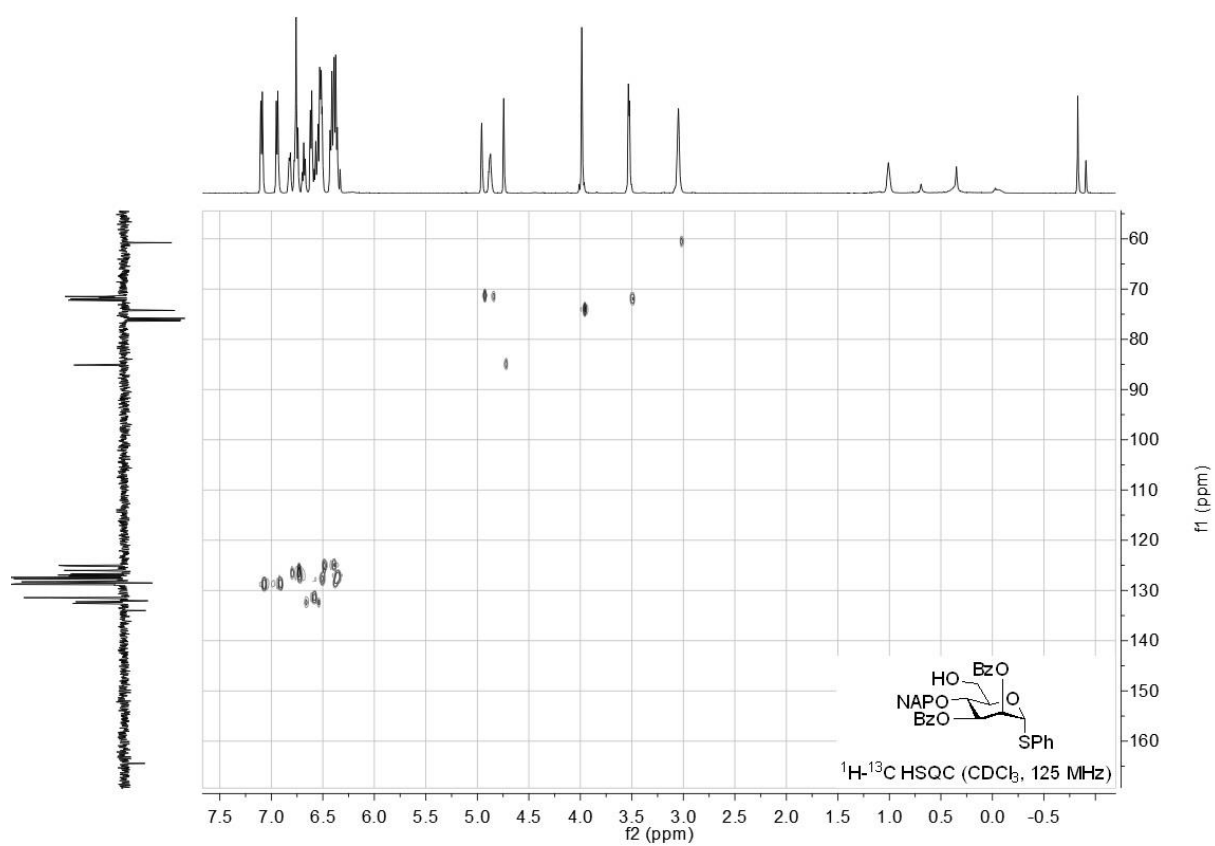

$^1\text{H}$  and  $^{13}\text{C}$  NMR spectra of compound **36**

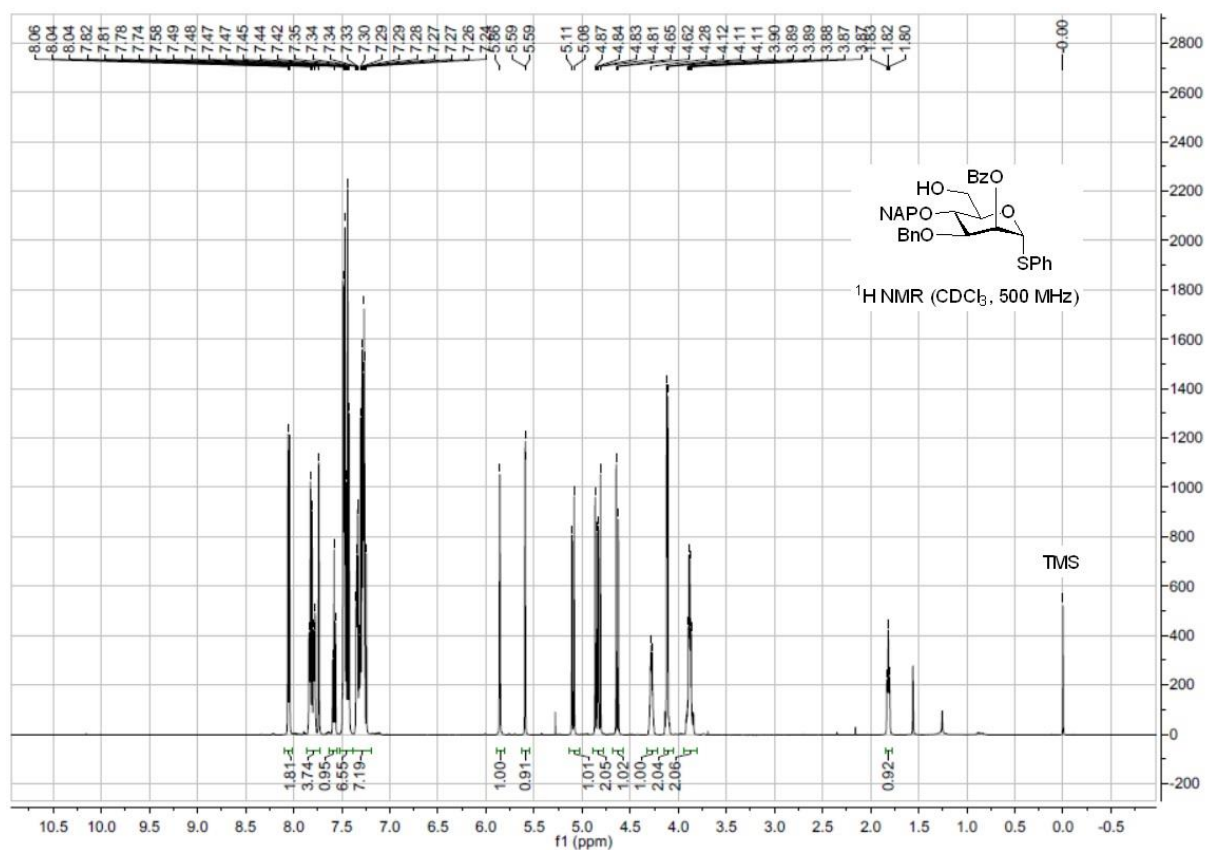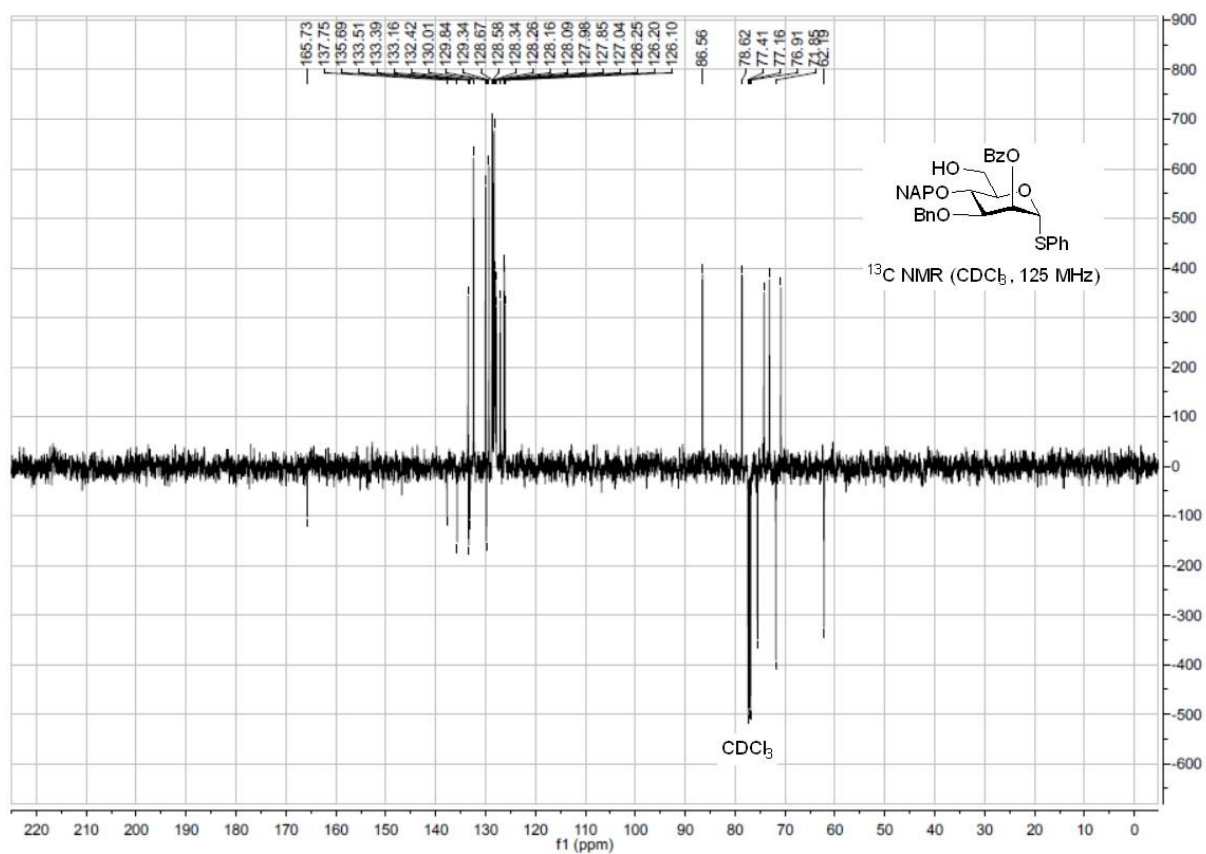

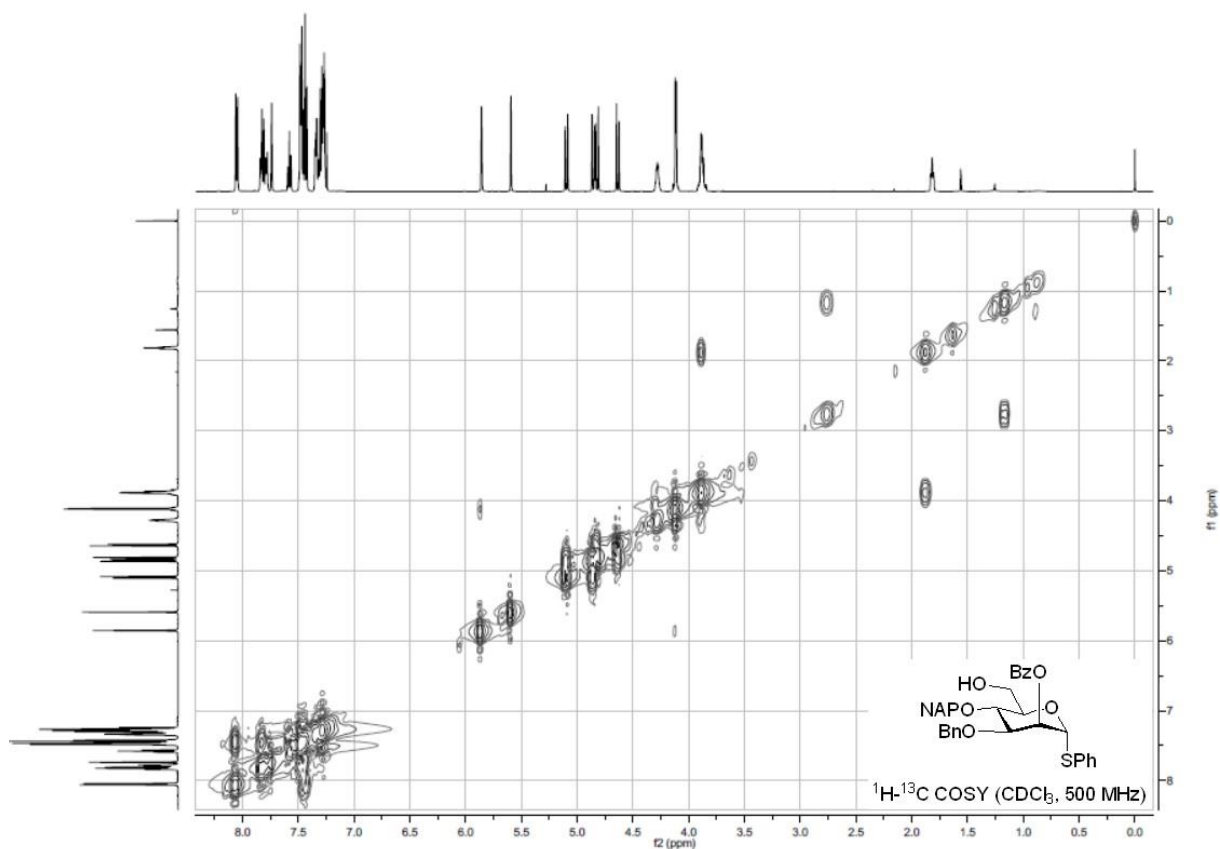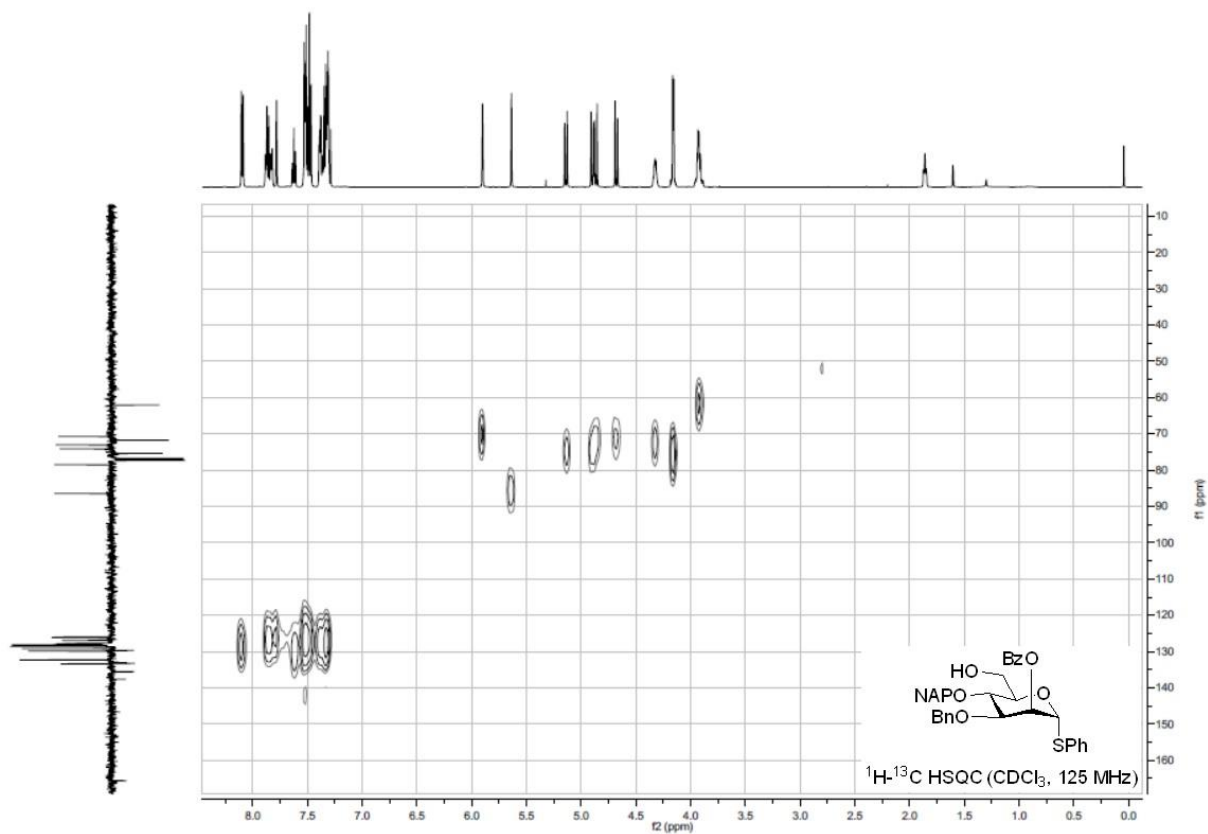

$^1\text{H}$  and  $^{13}\text{C}$  NMR spectra of compound **37**

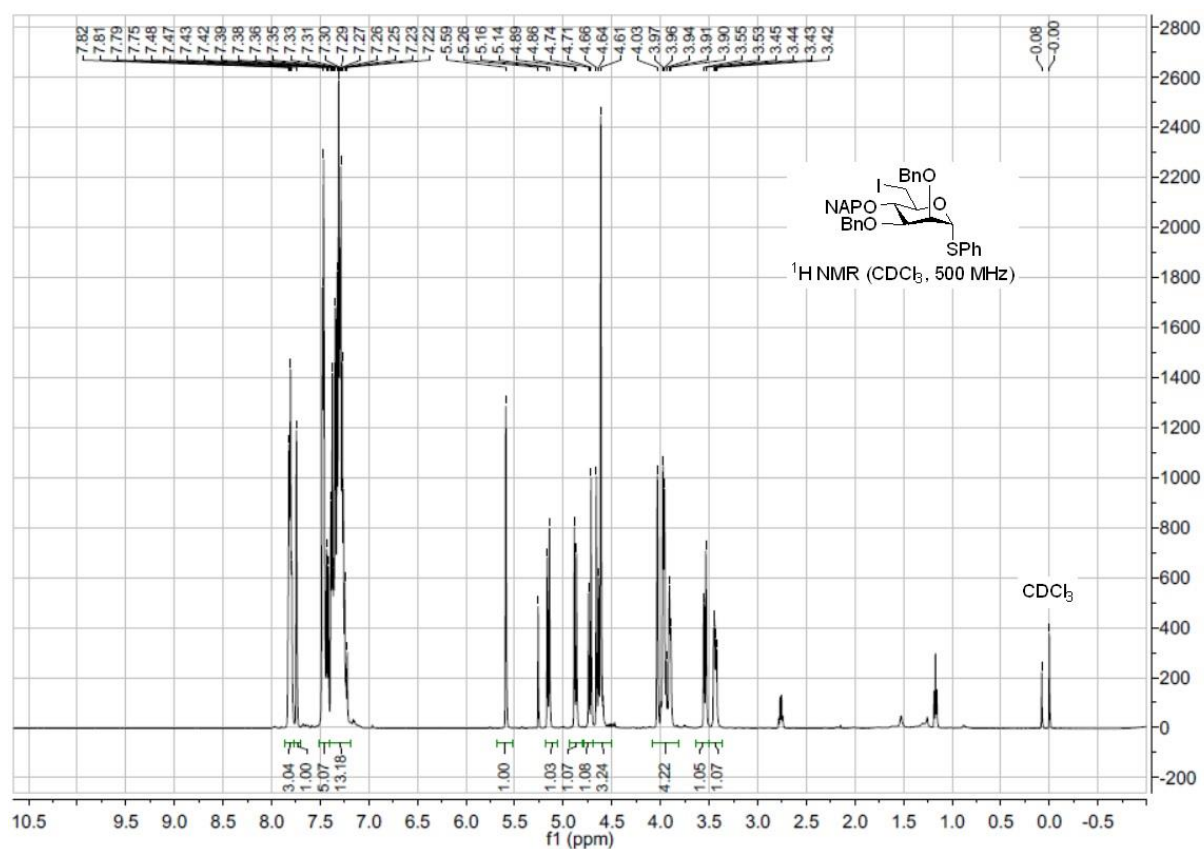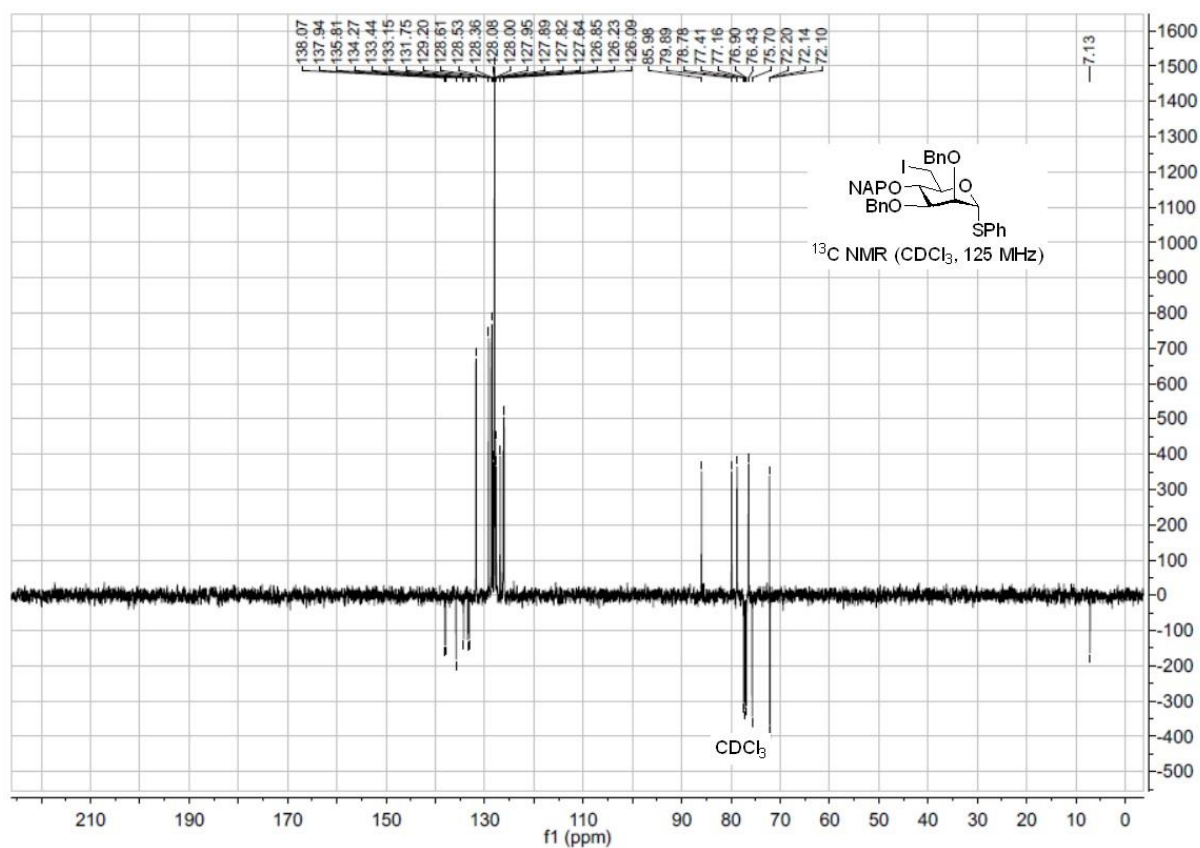

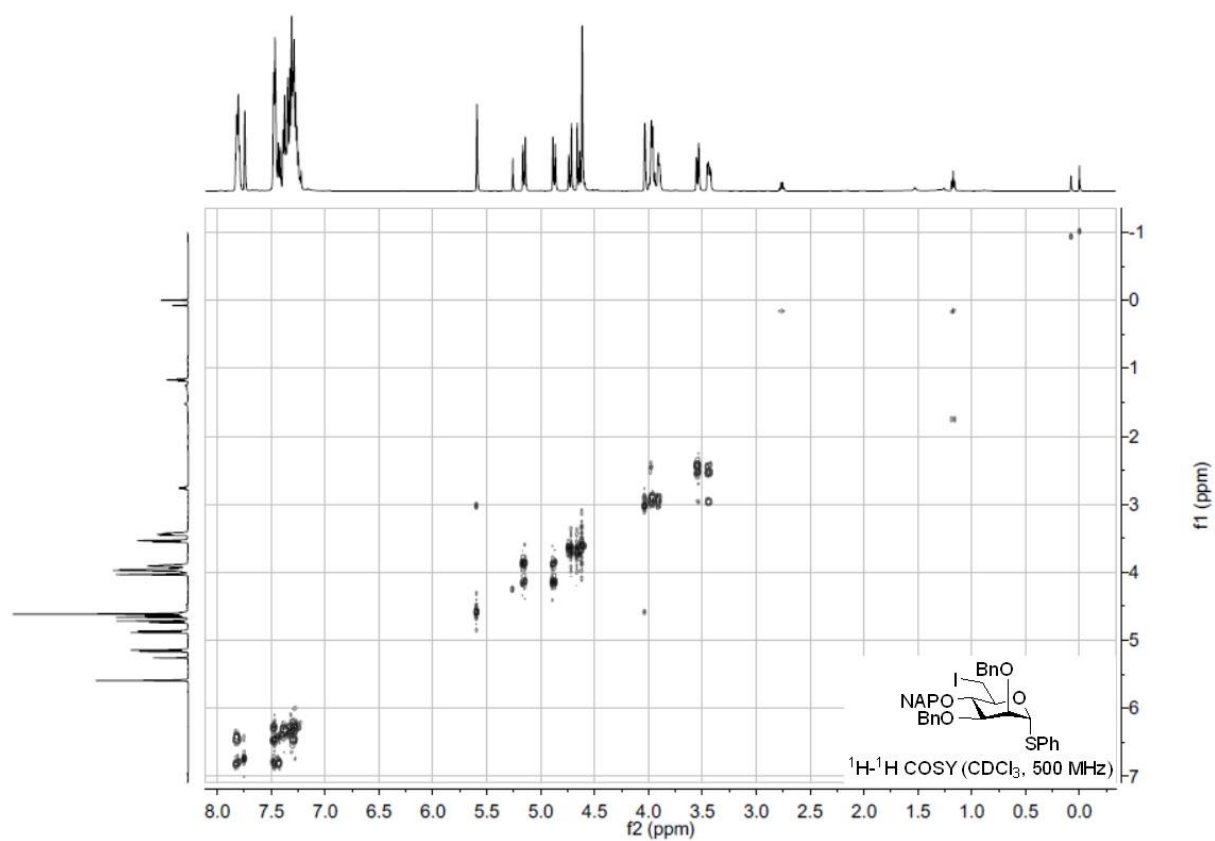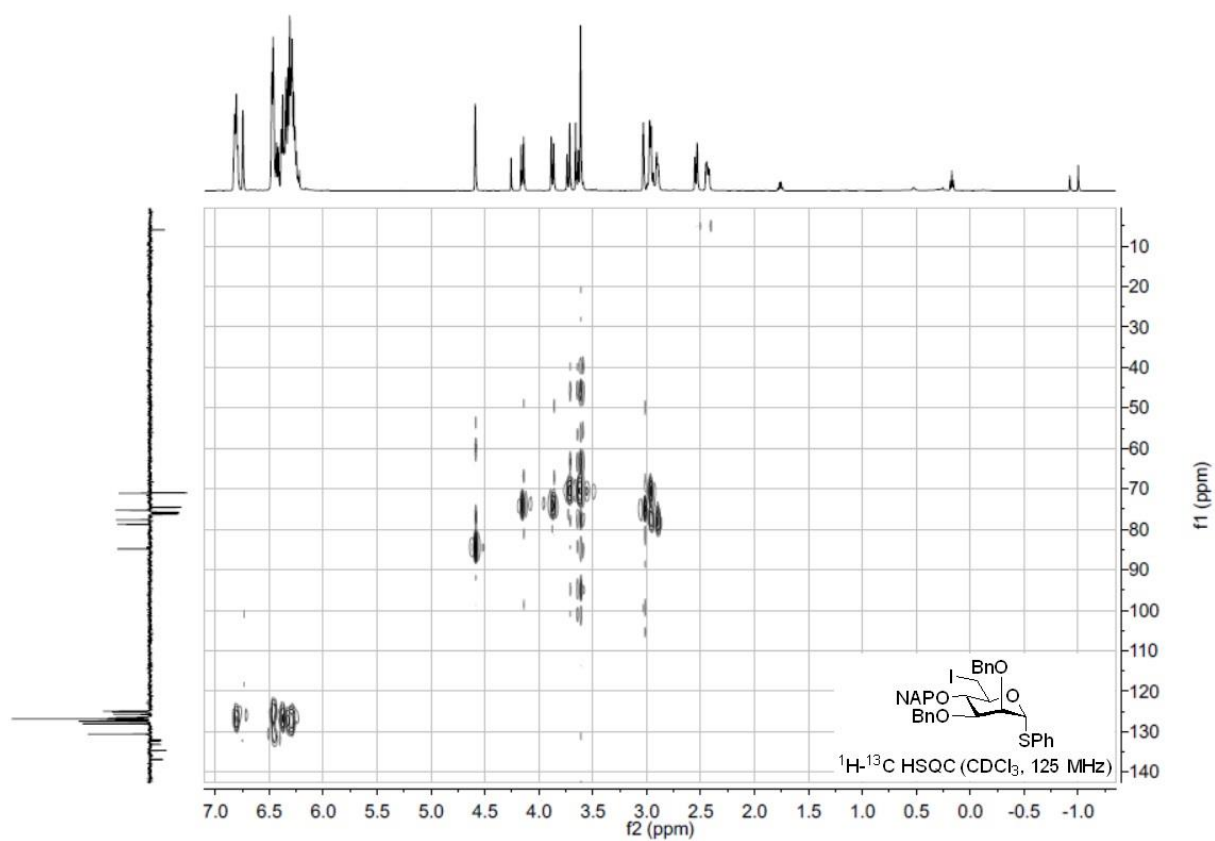

$^1\text{H}$  and  $^{13}\text{C}$  NMR spectra of compound **38**

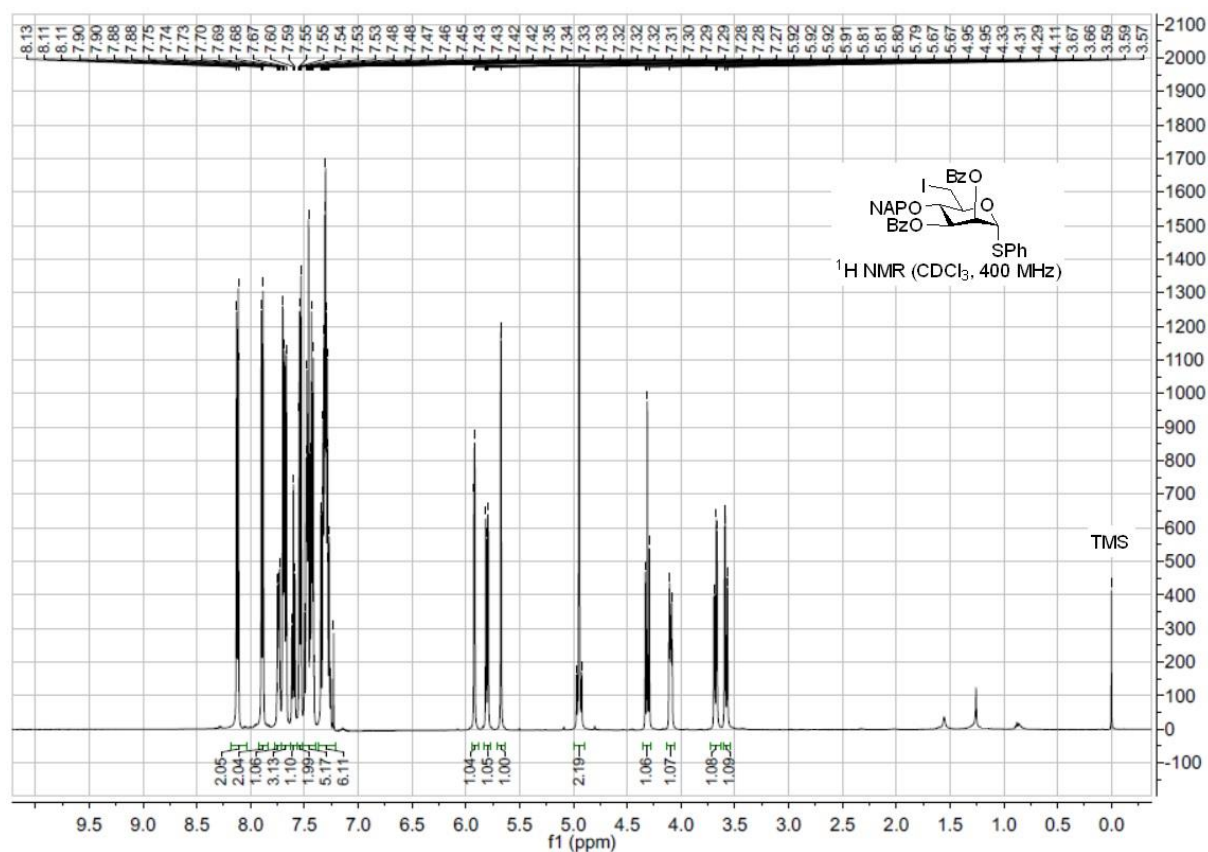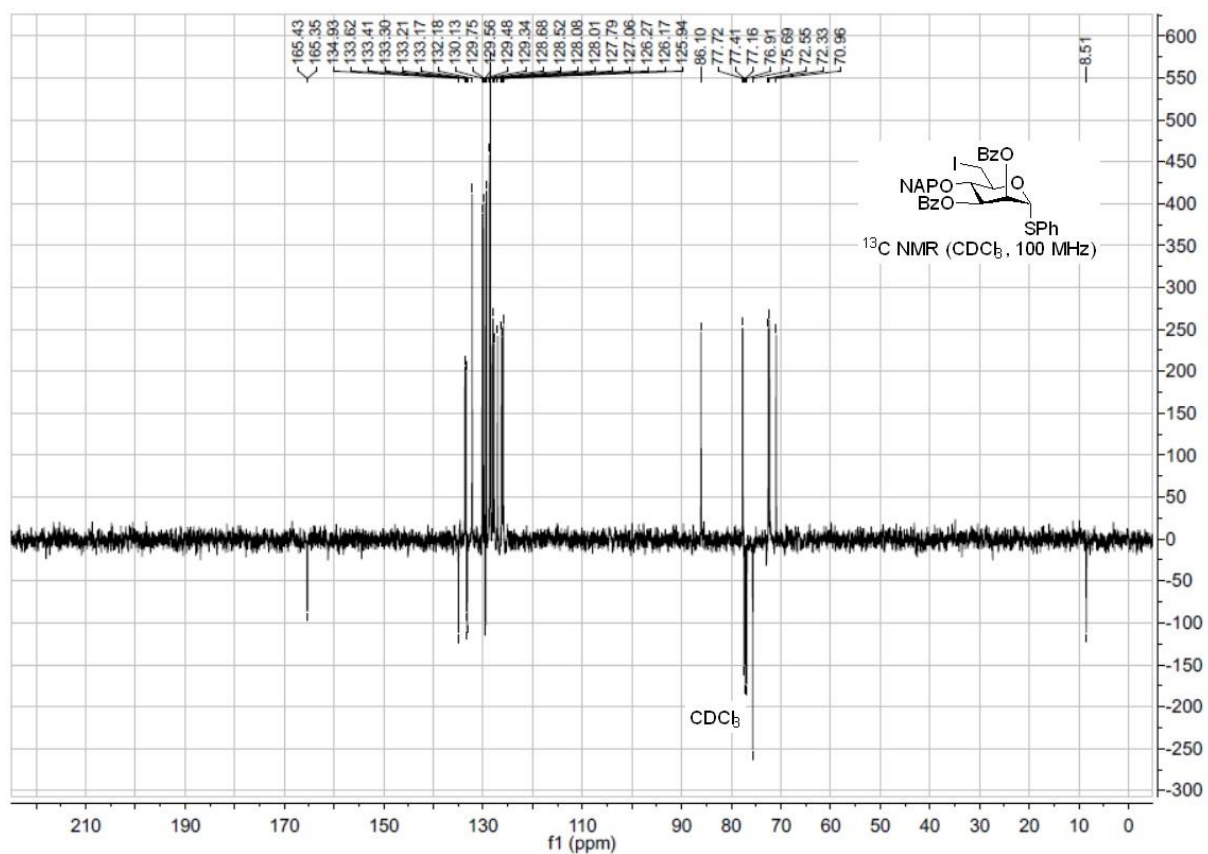

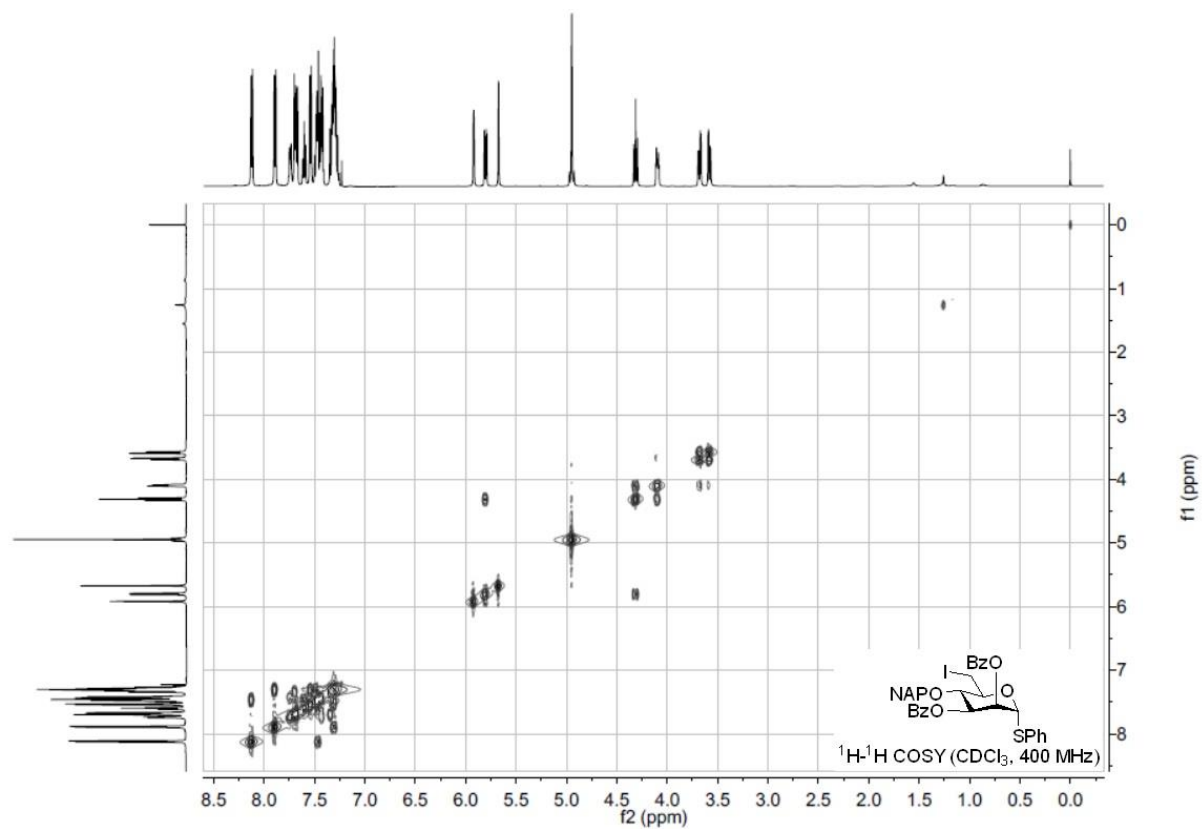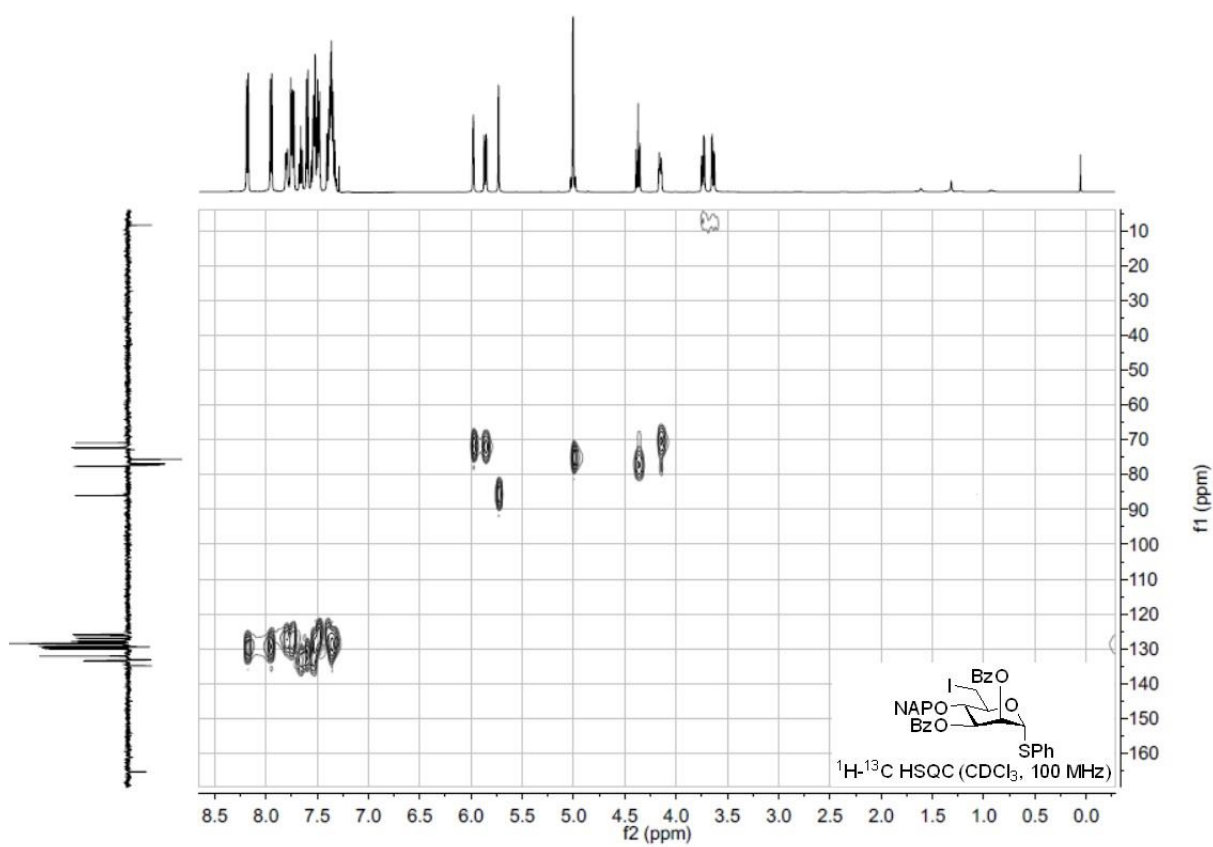



$^1\text{H}$  and  $^{13}\text{C}$  NMR spectra of compound **39**

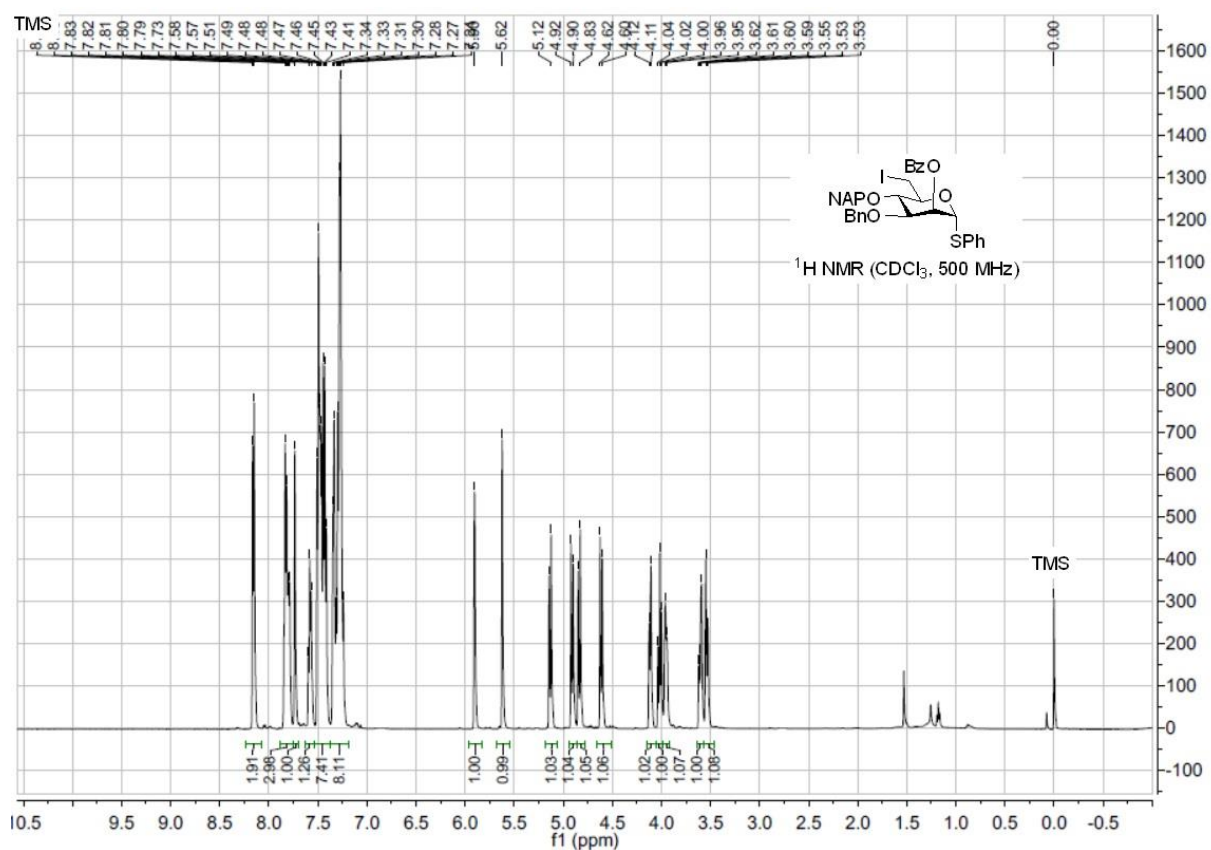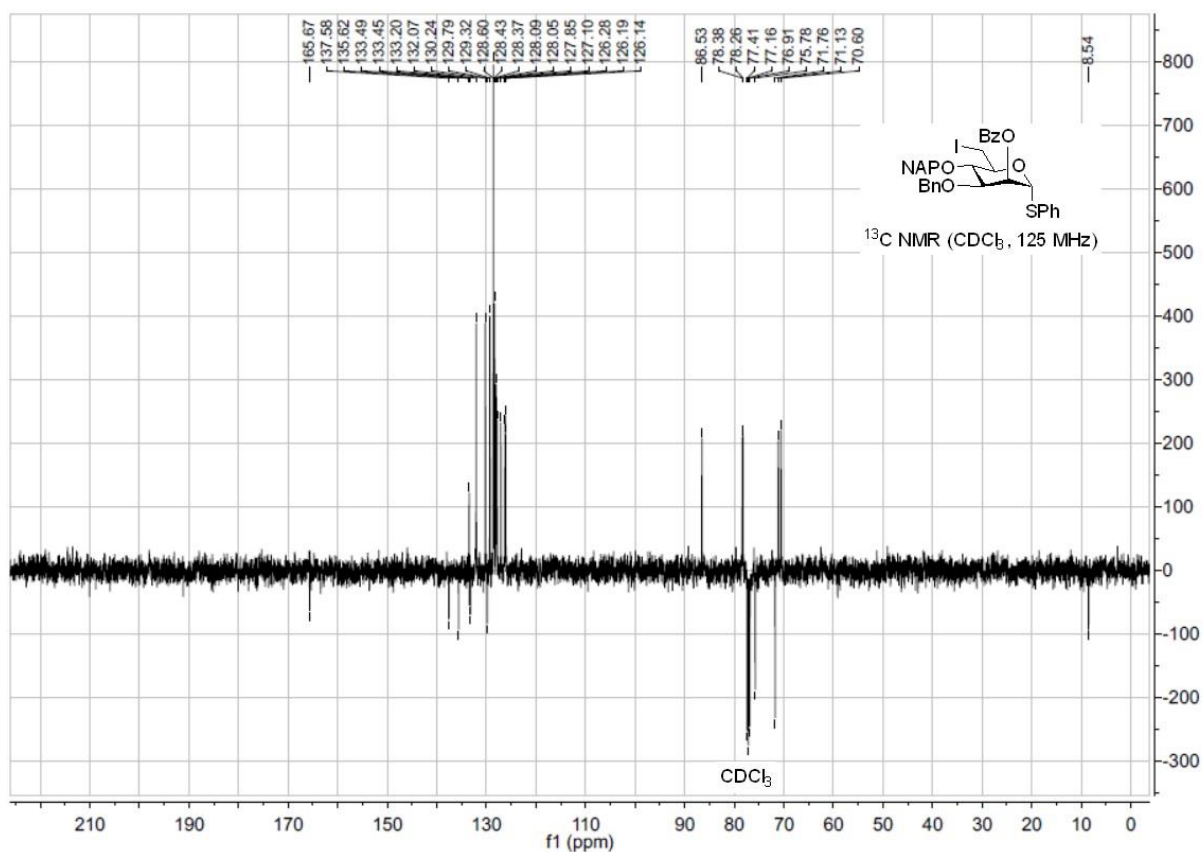



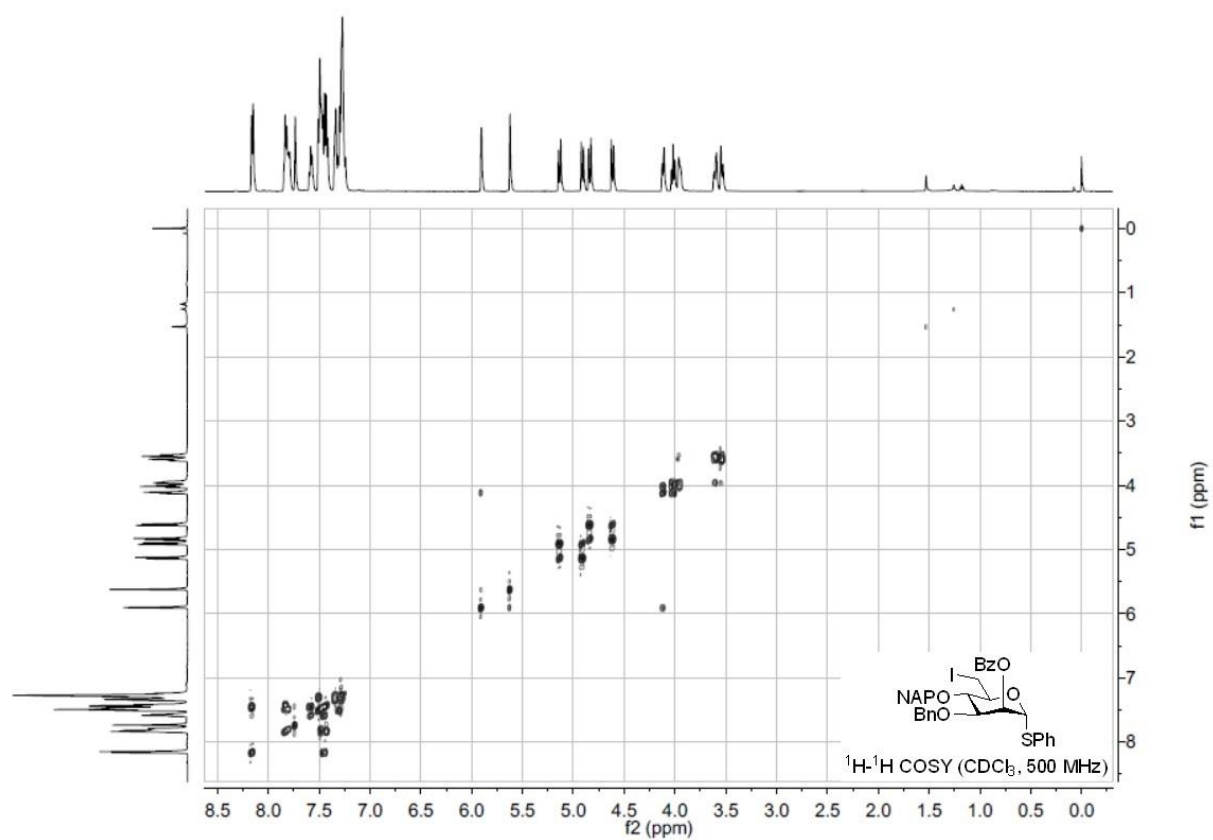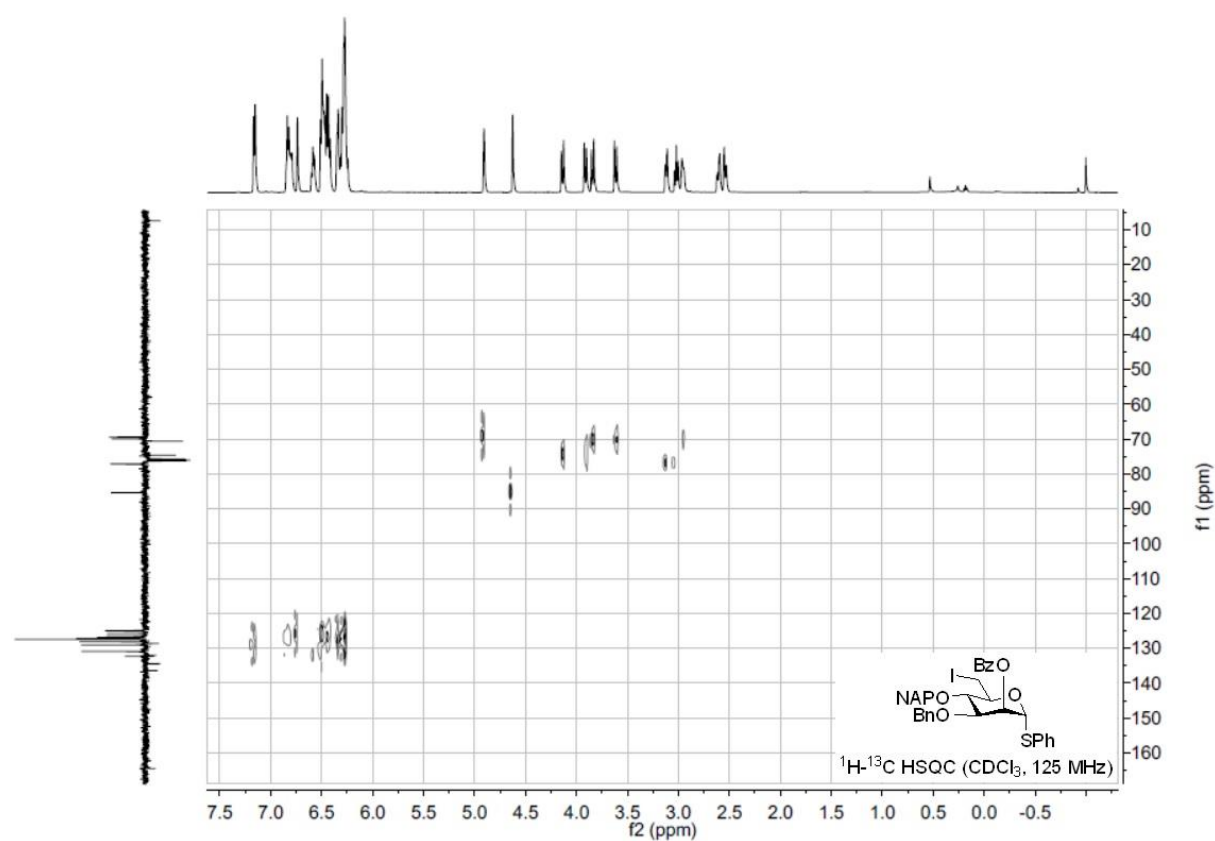

$^1\text{H}$  and  $^{13}\text{C}$  NMR spectra of compound **40**

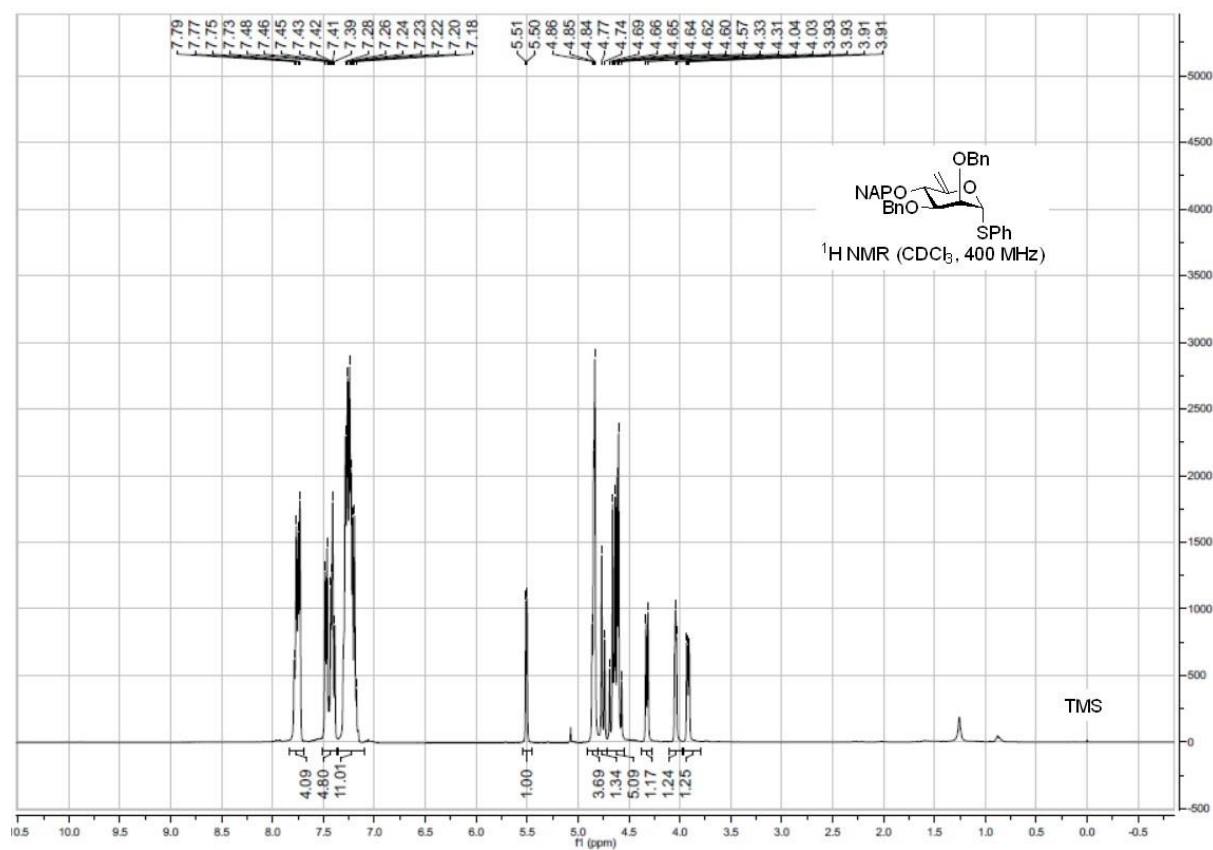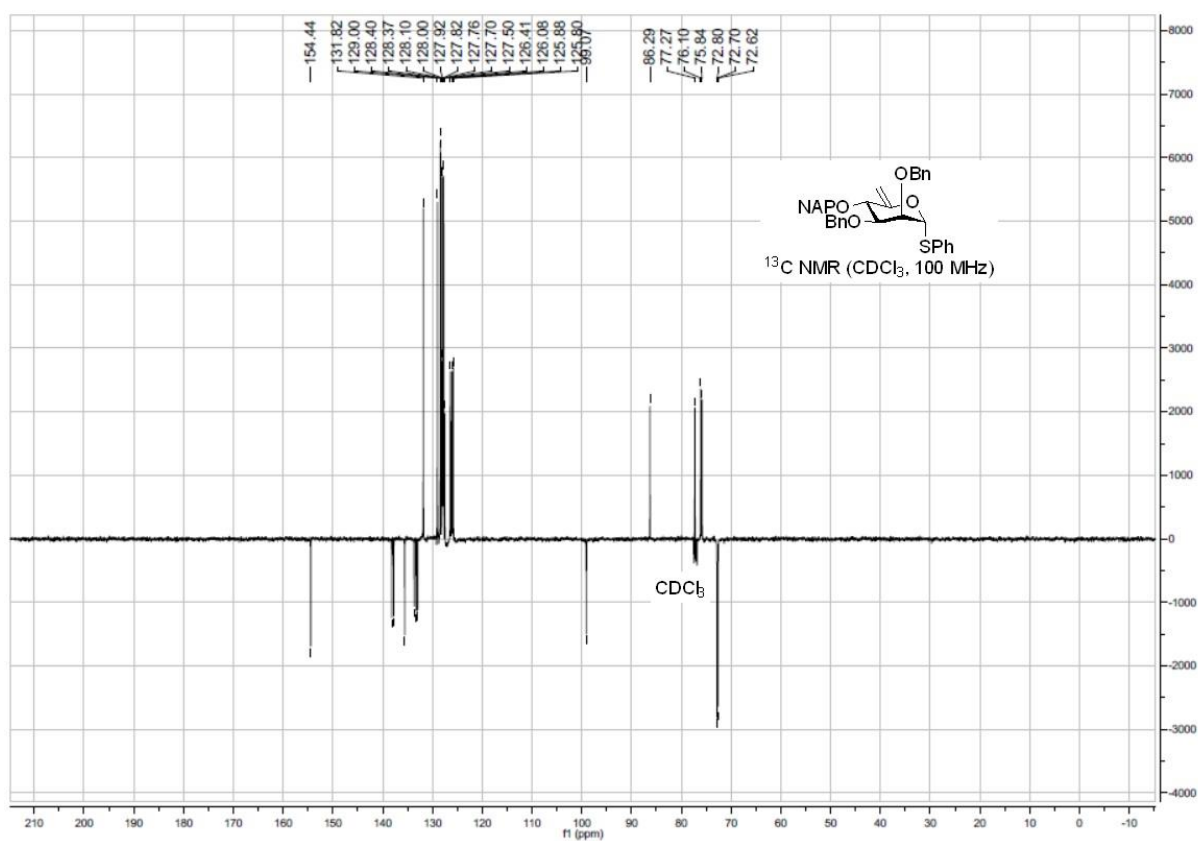

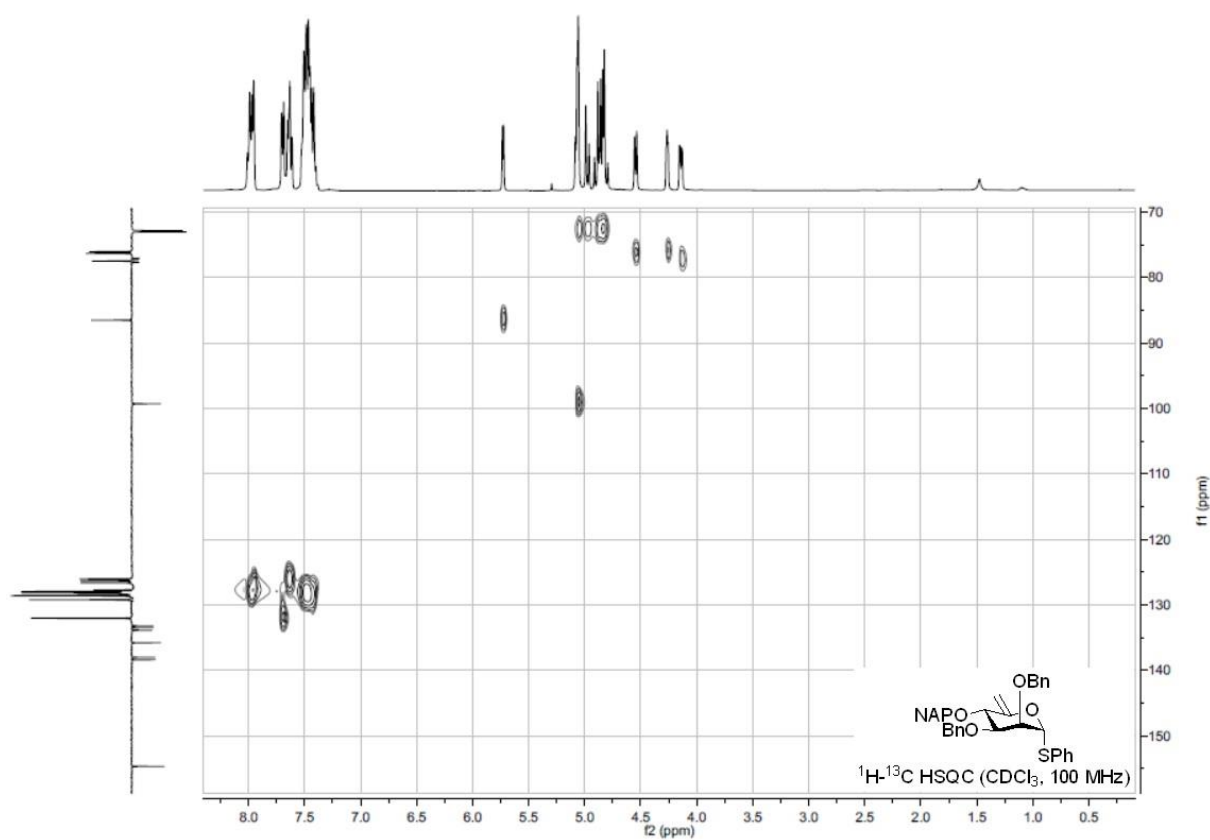

$^1\text{H}$  and  $^{13}\text{C}$  NMR spectra of compound **41**

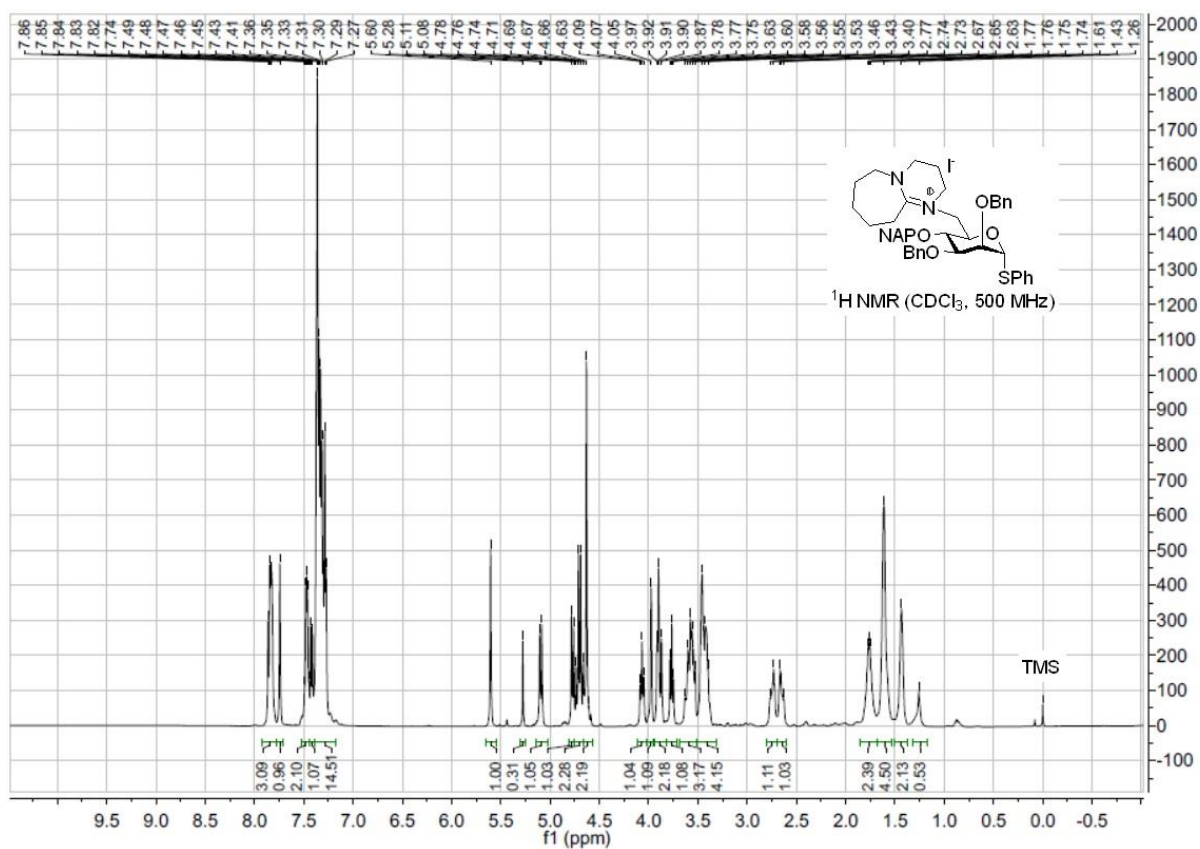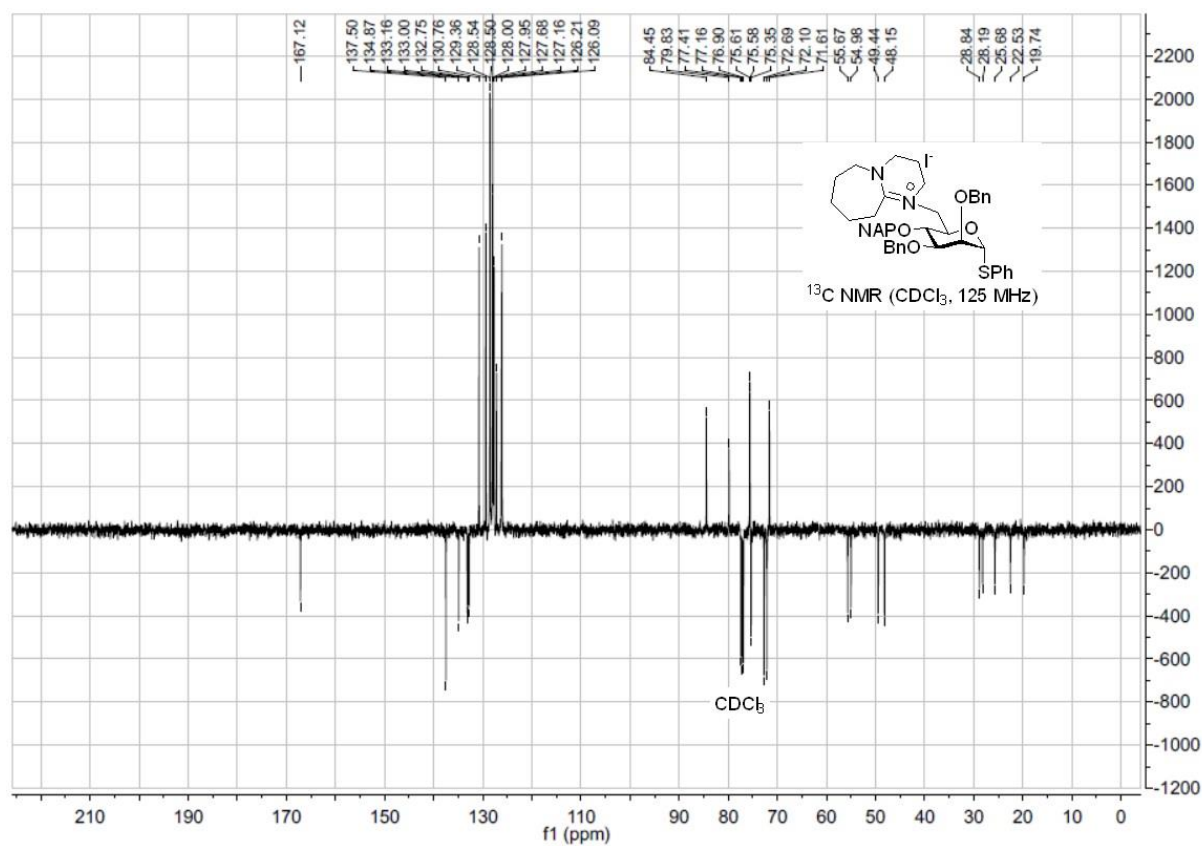

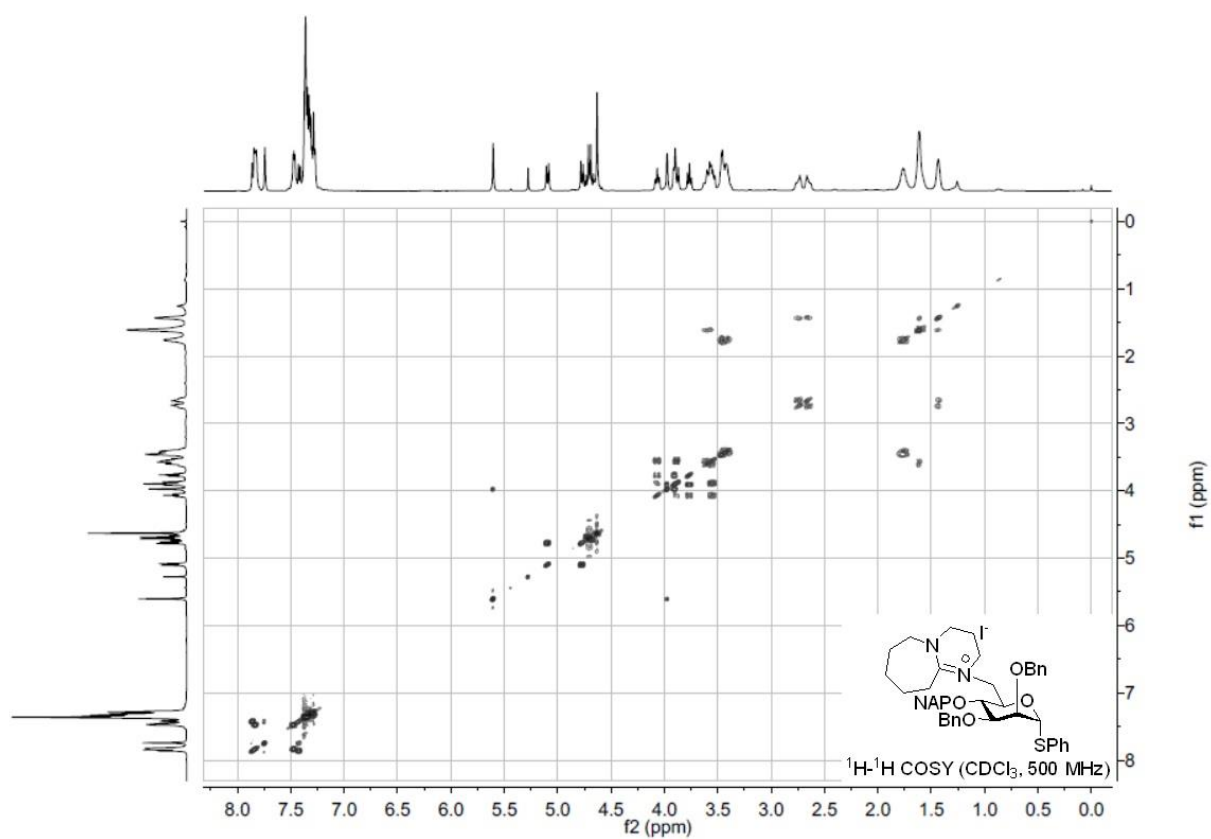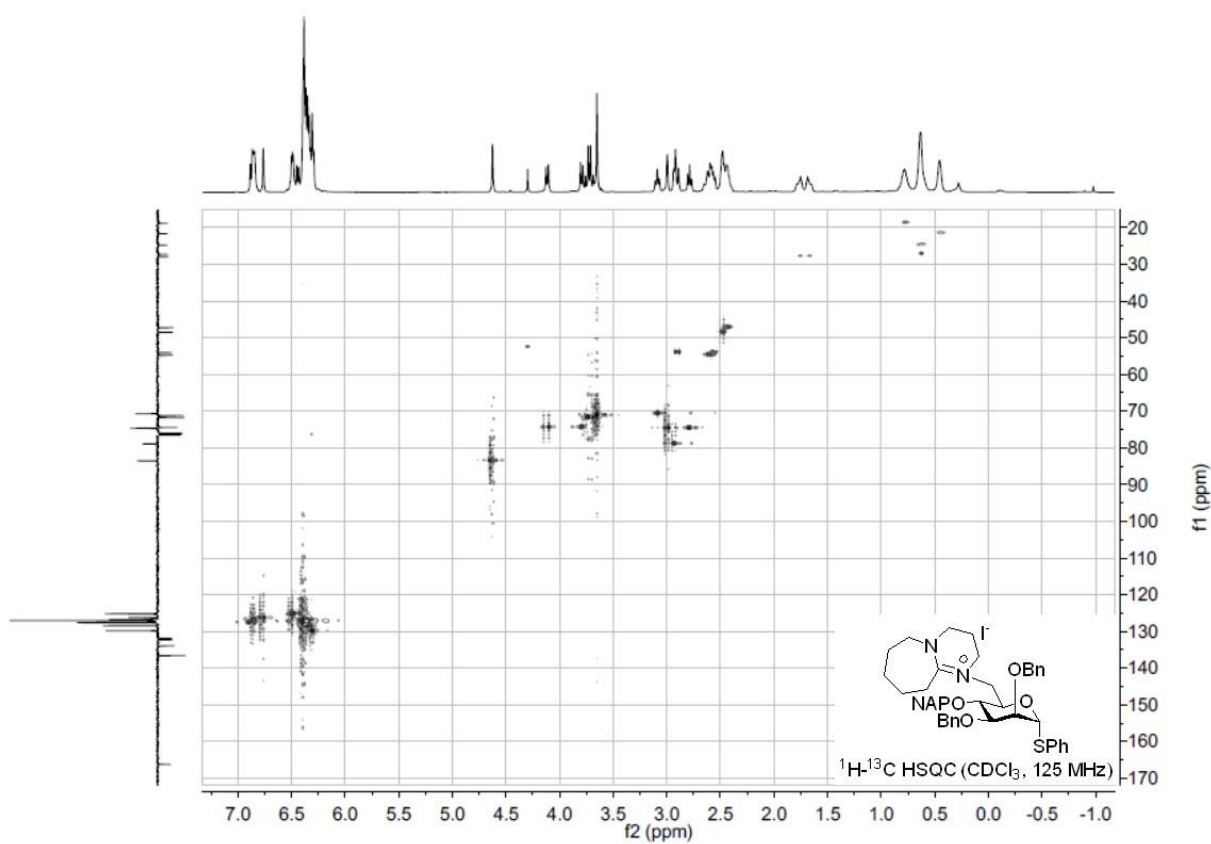

$^1\text{H}$  and  $^{13}\text{C}$  NMR spectra of compound **42**

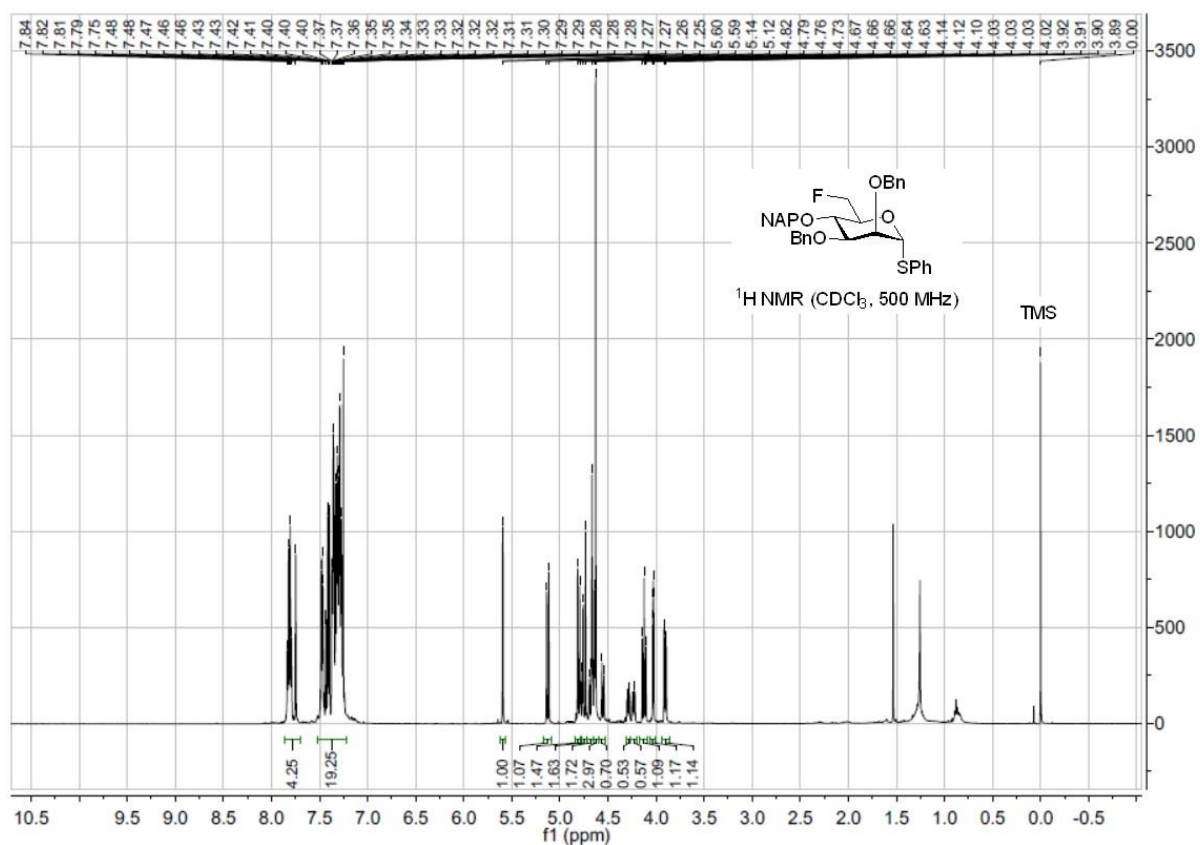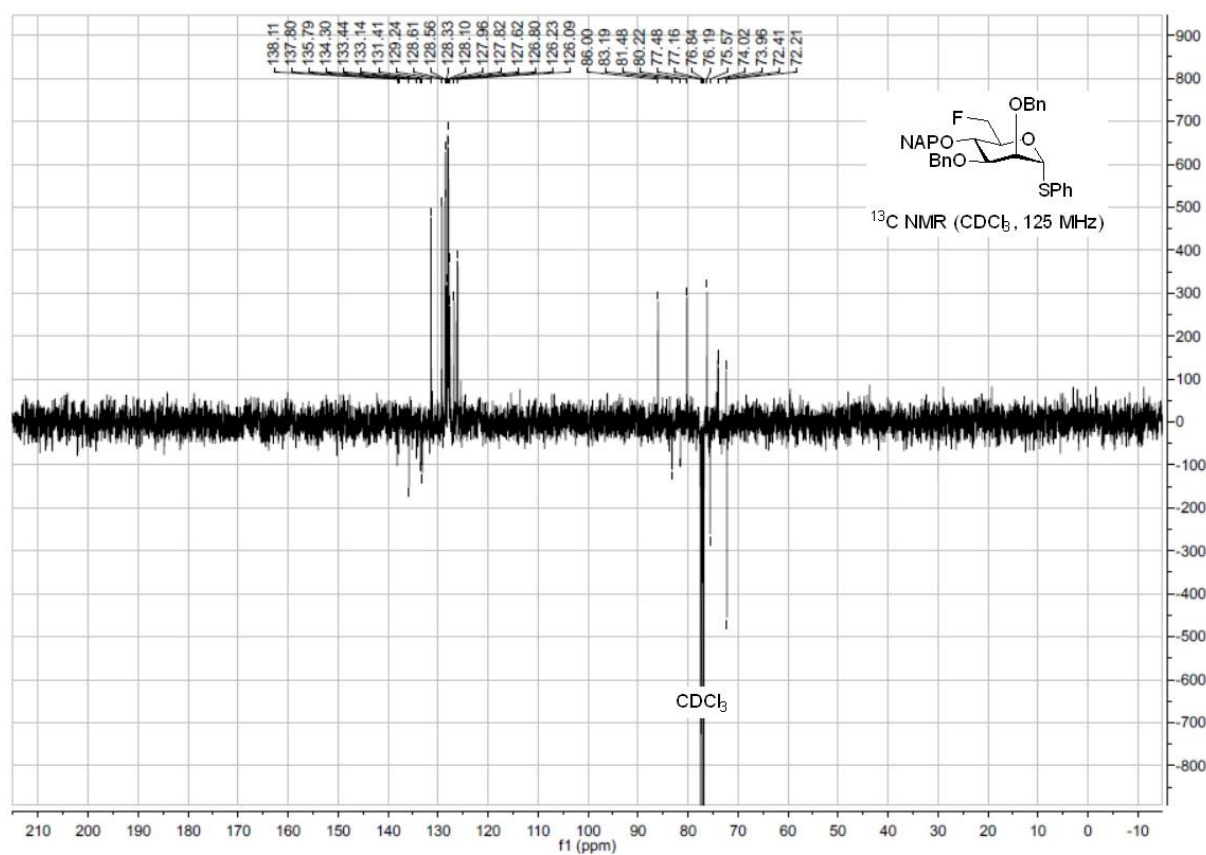

$^1\text{H}$  and  $^{13}\text{C}$  NMR spectra of compound **43**

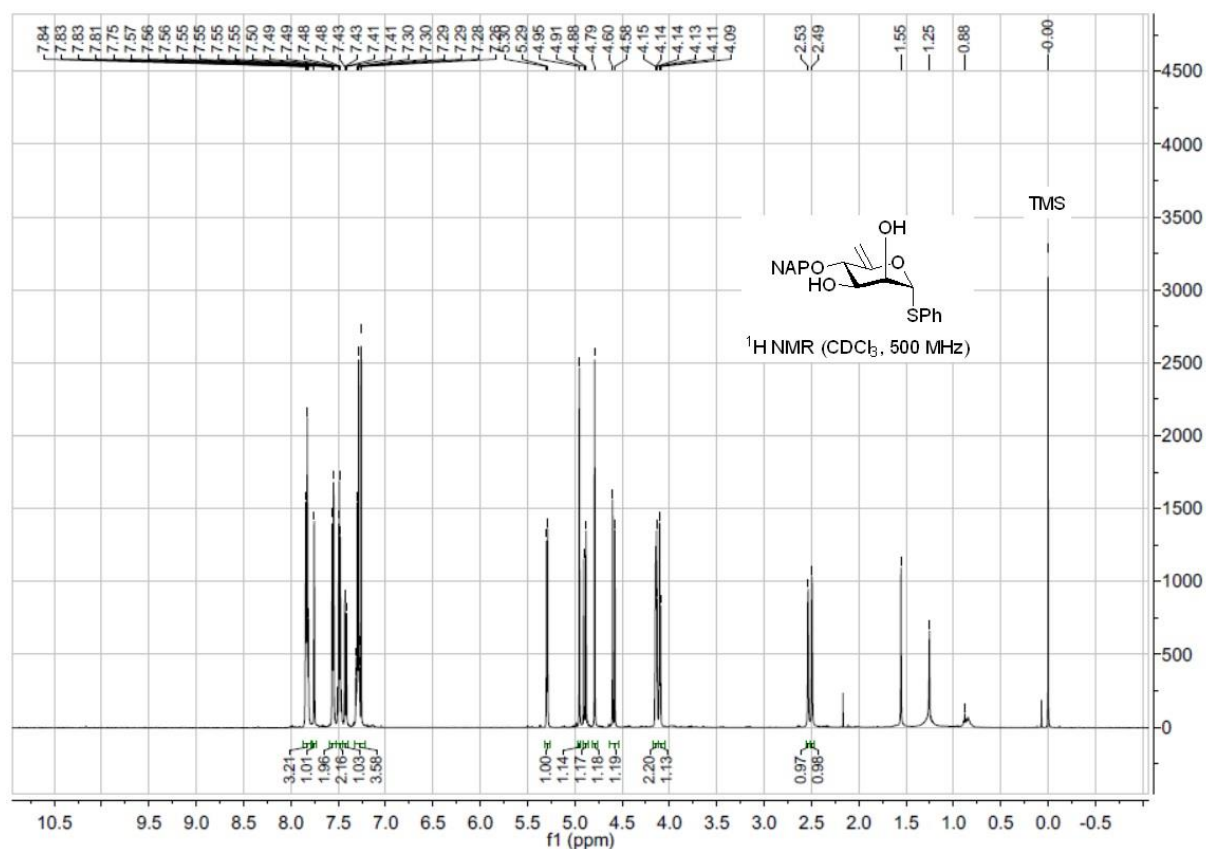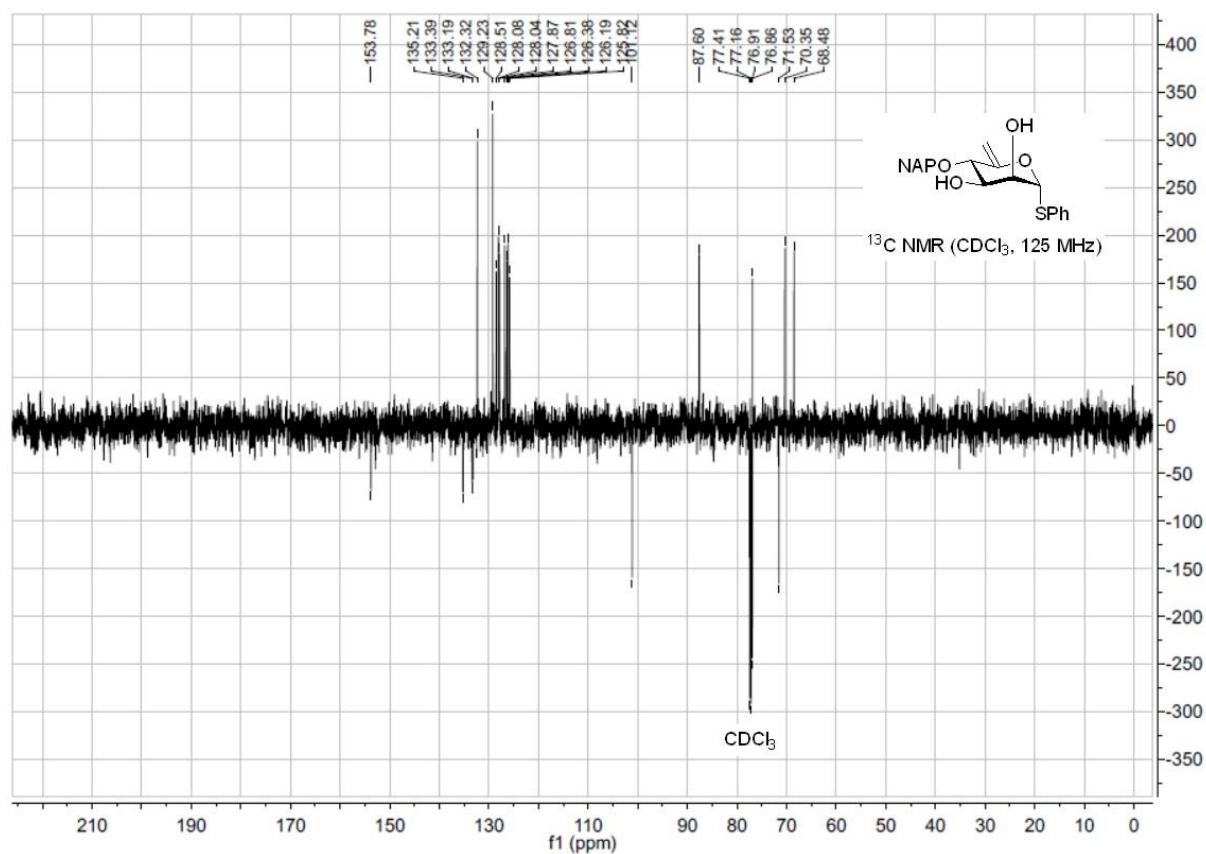



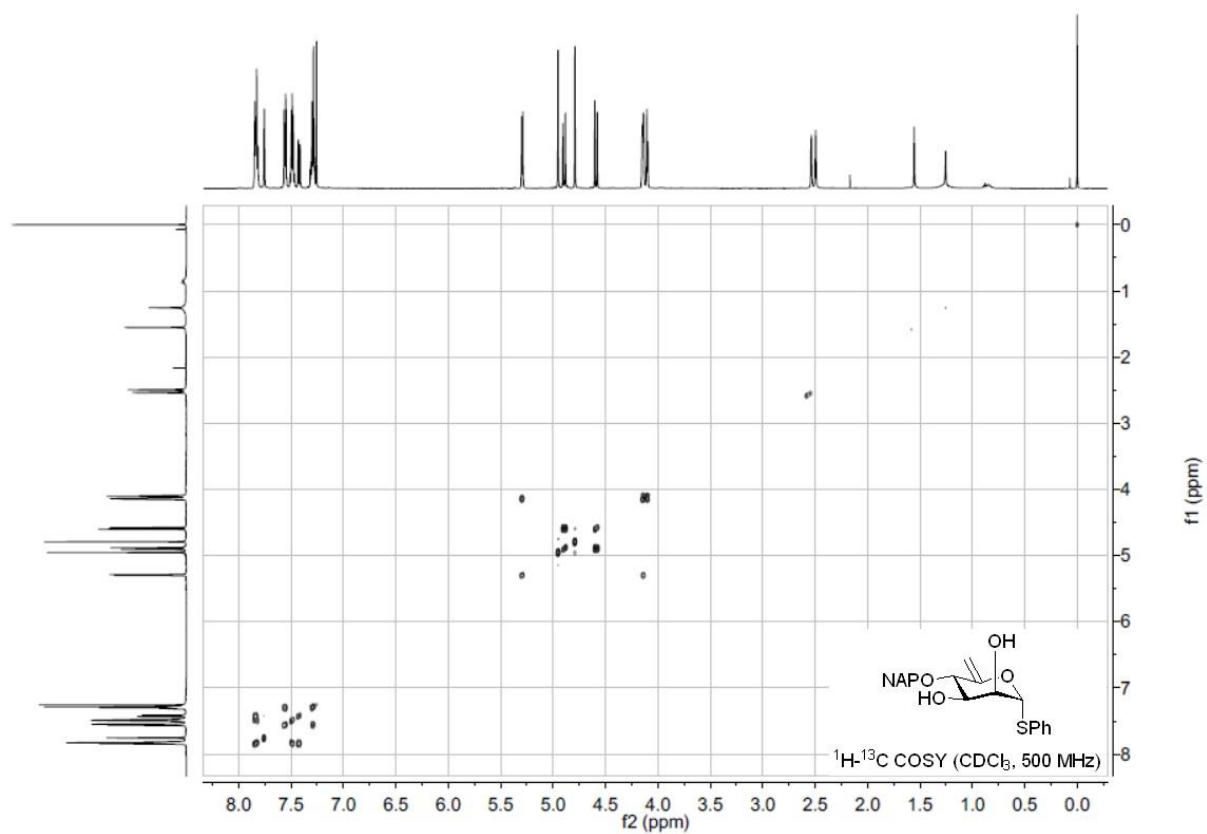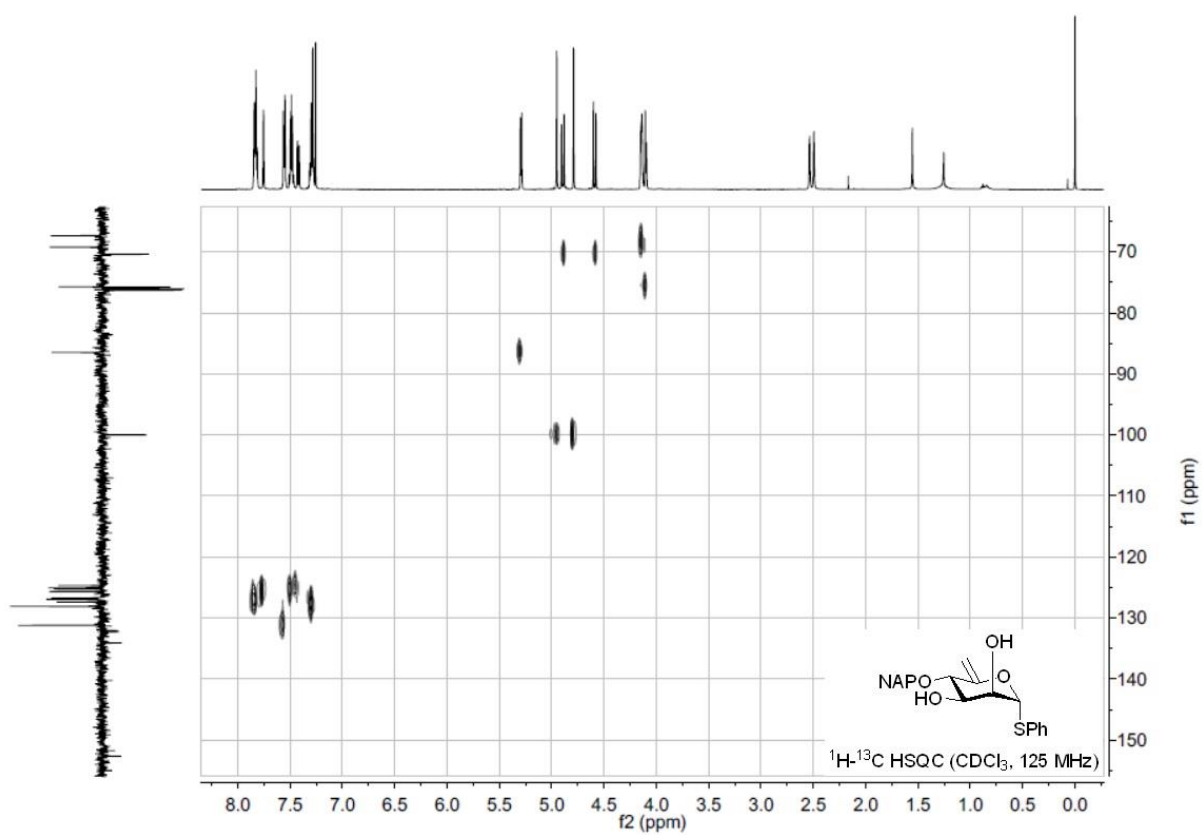



$^1\text{H}$  and  $^{13}\text{C}$  NMR spectra of compound **44**

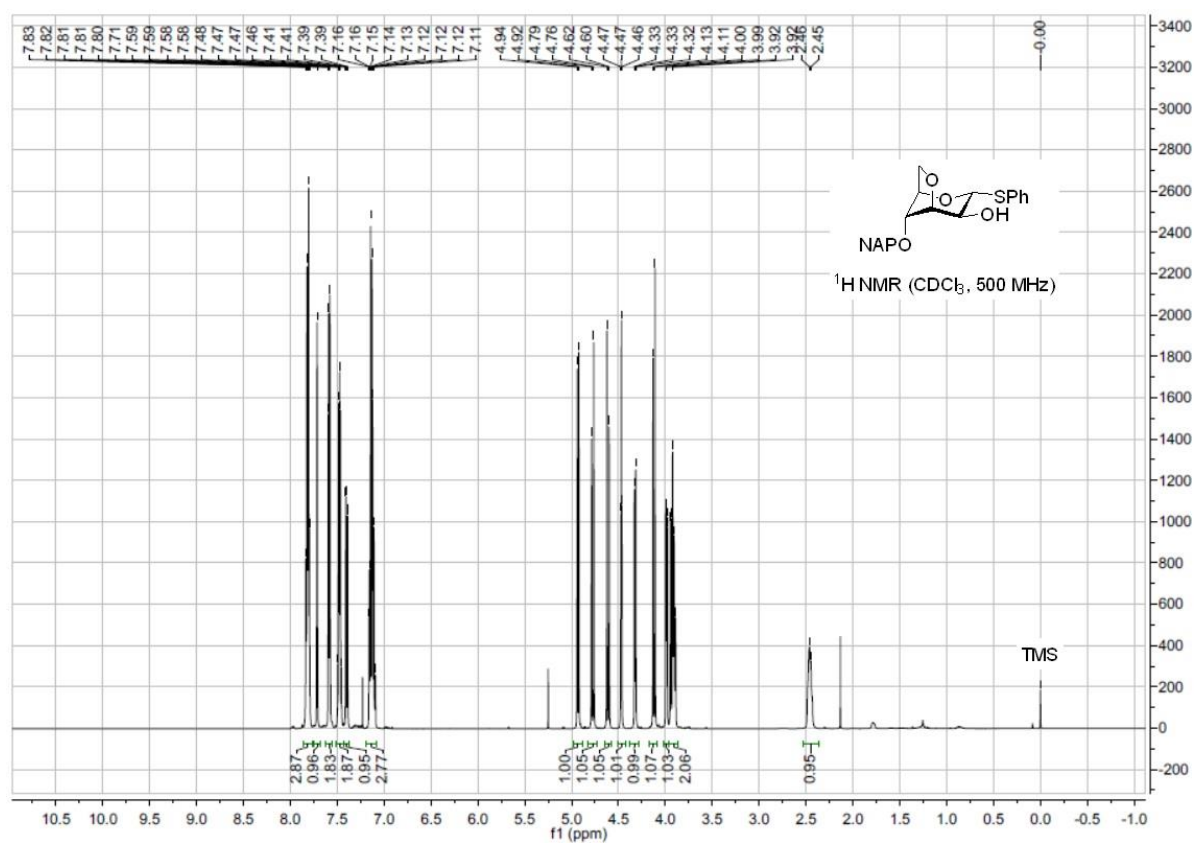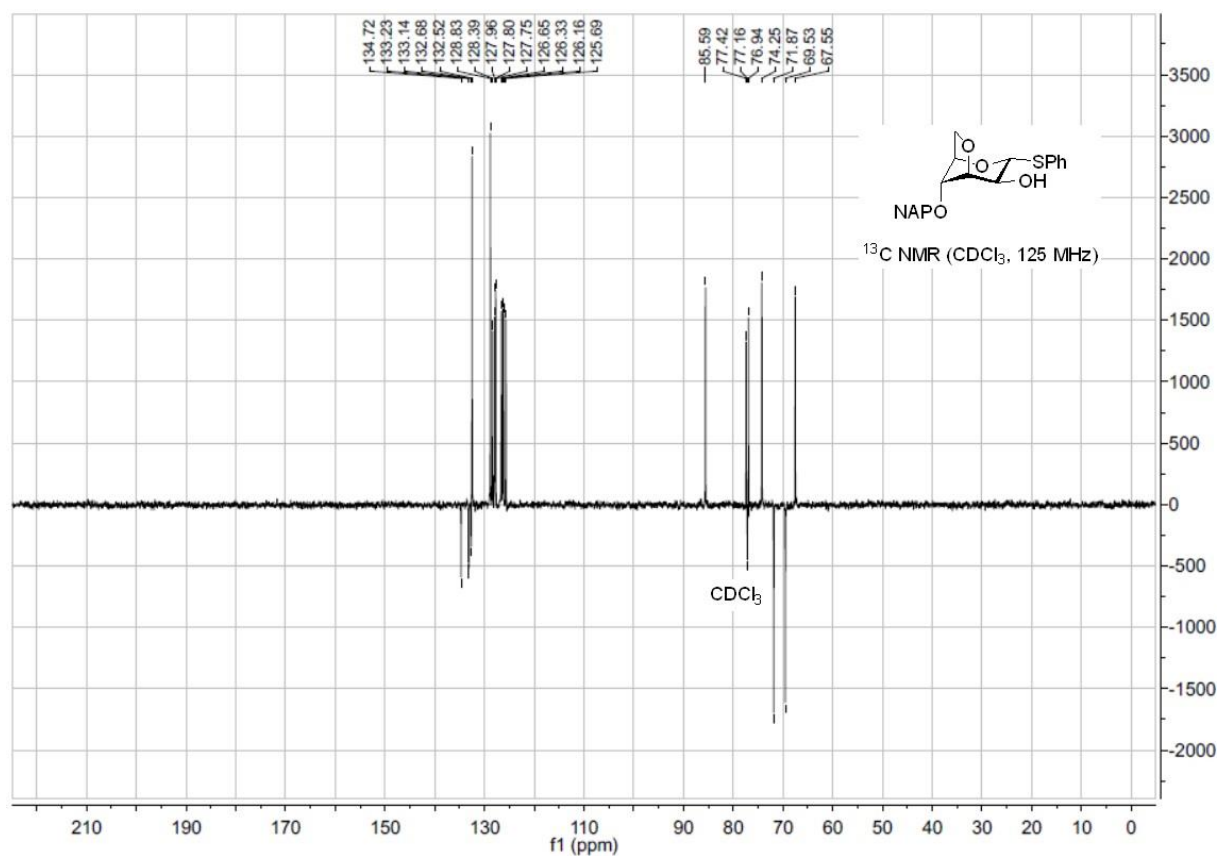

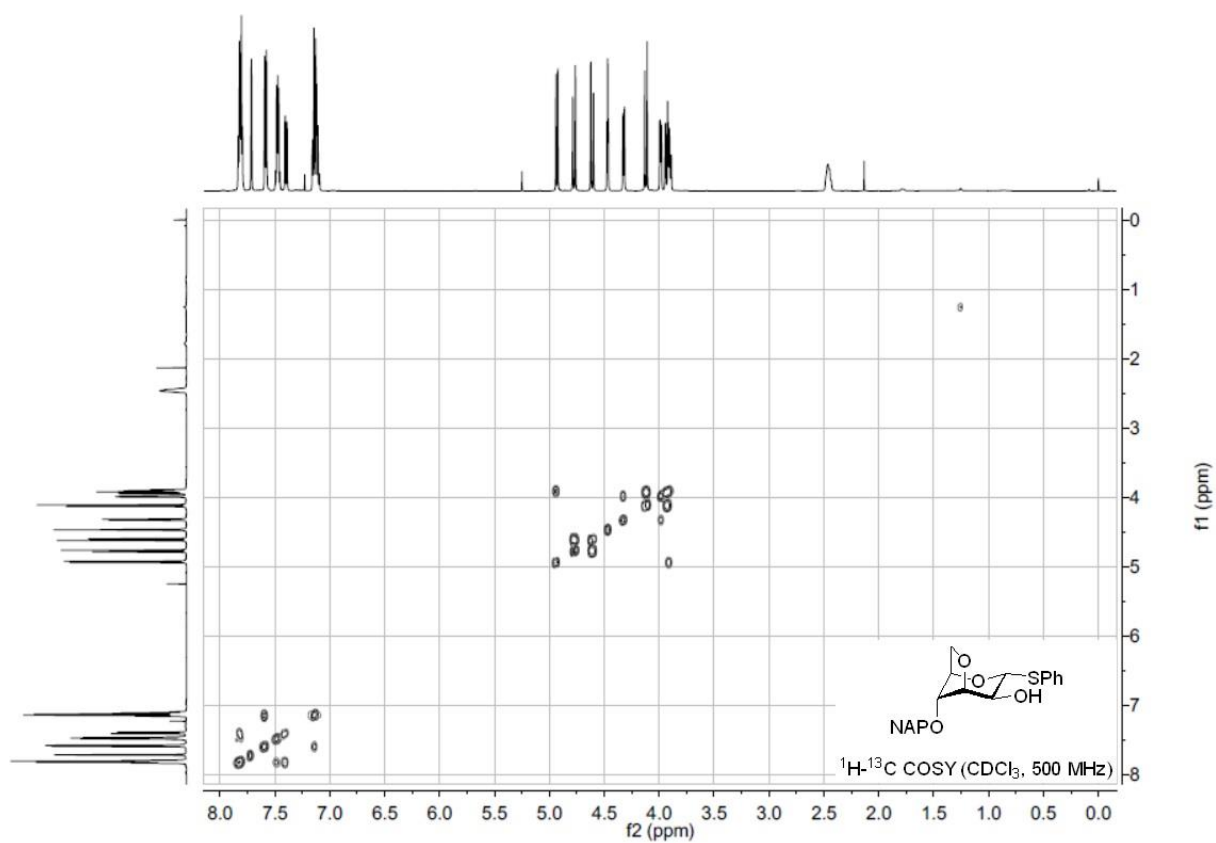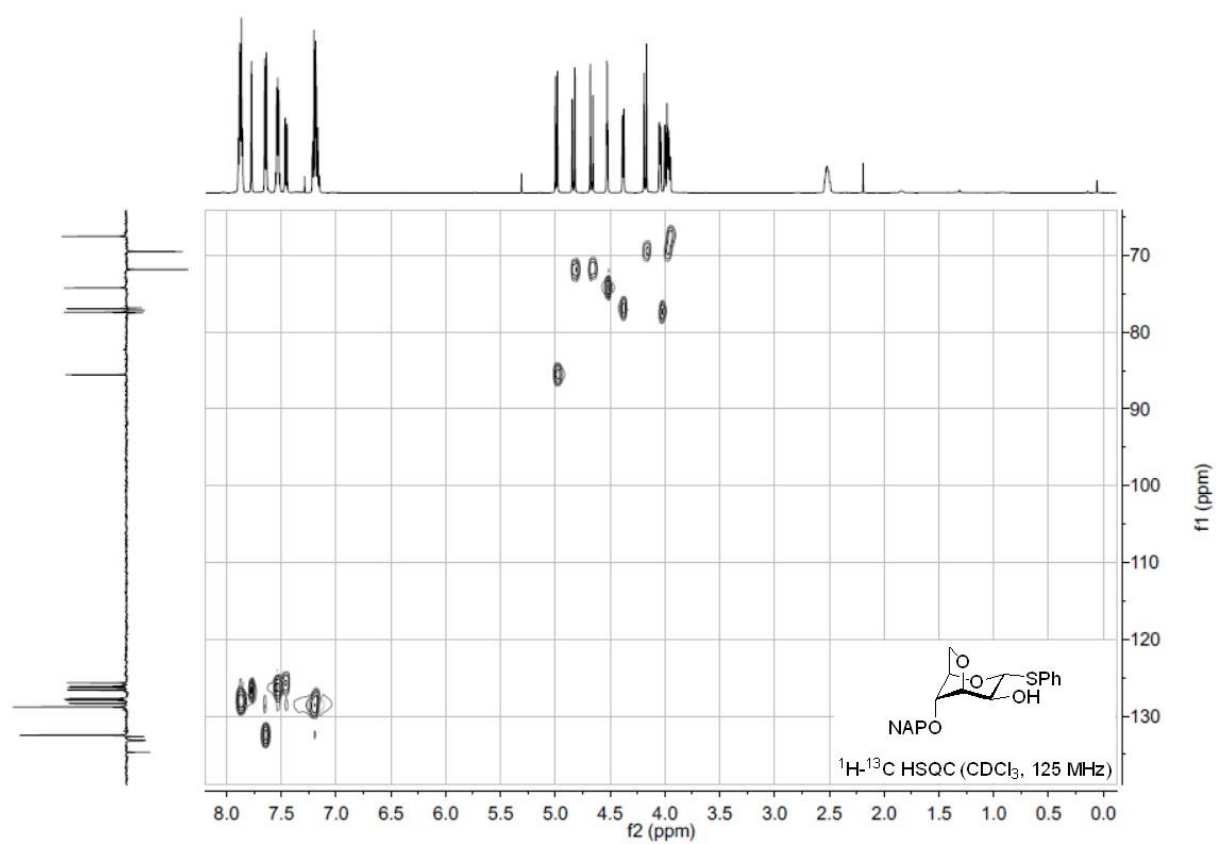

$^1\text{H}$  and  $^{13}\text{C}$  NMR spectra of compound 45

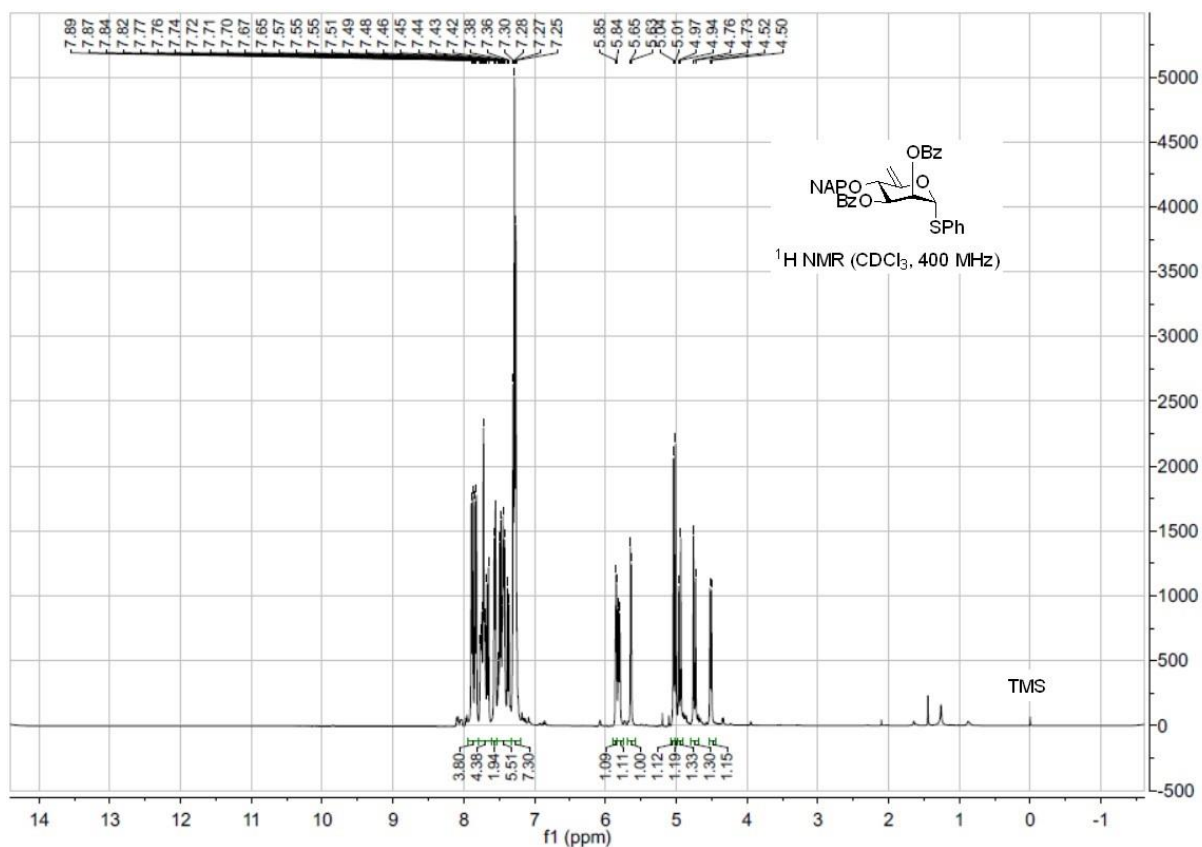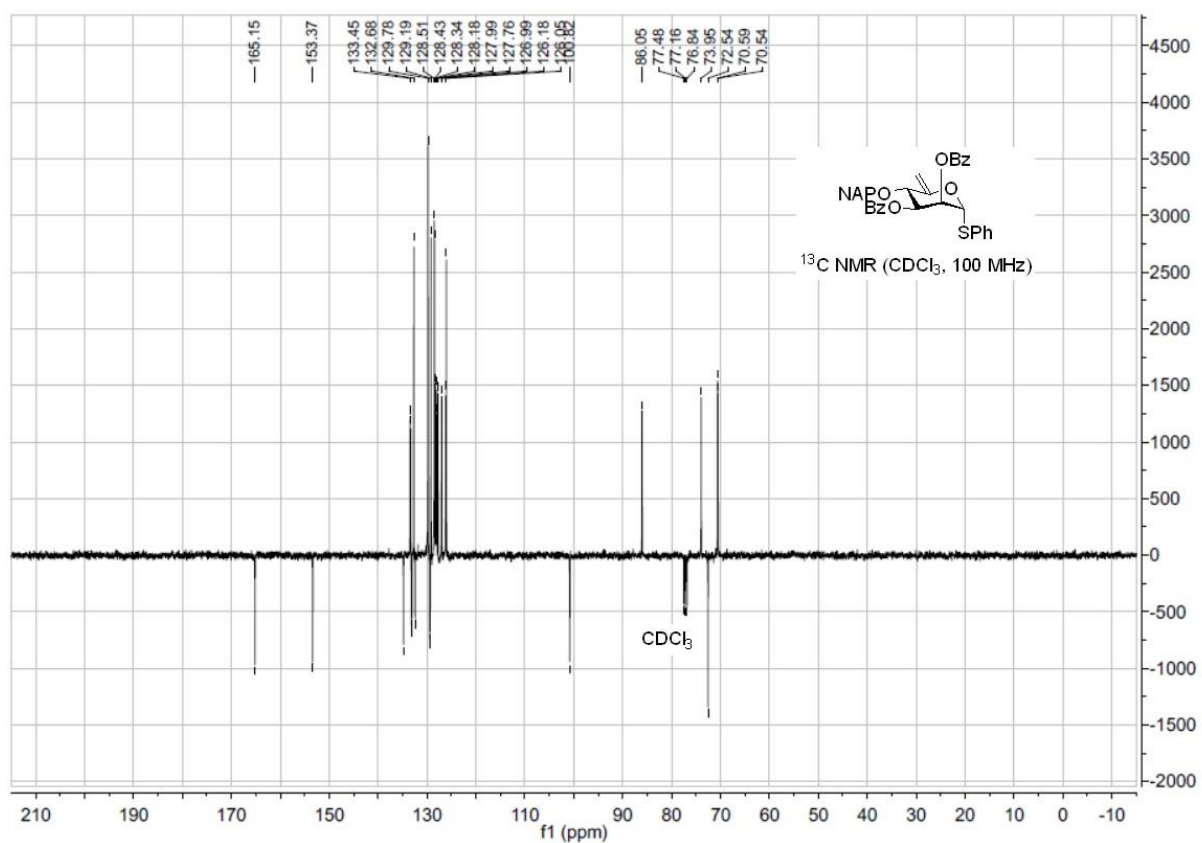

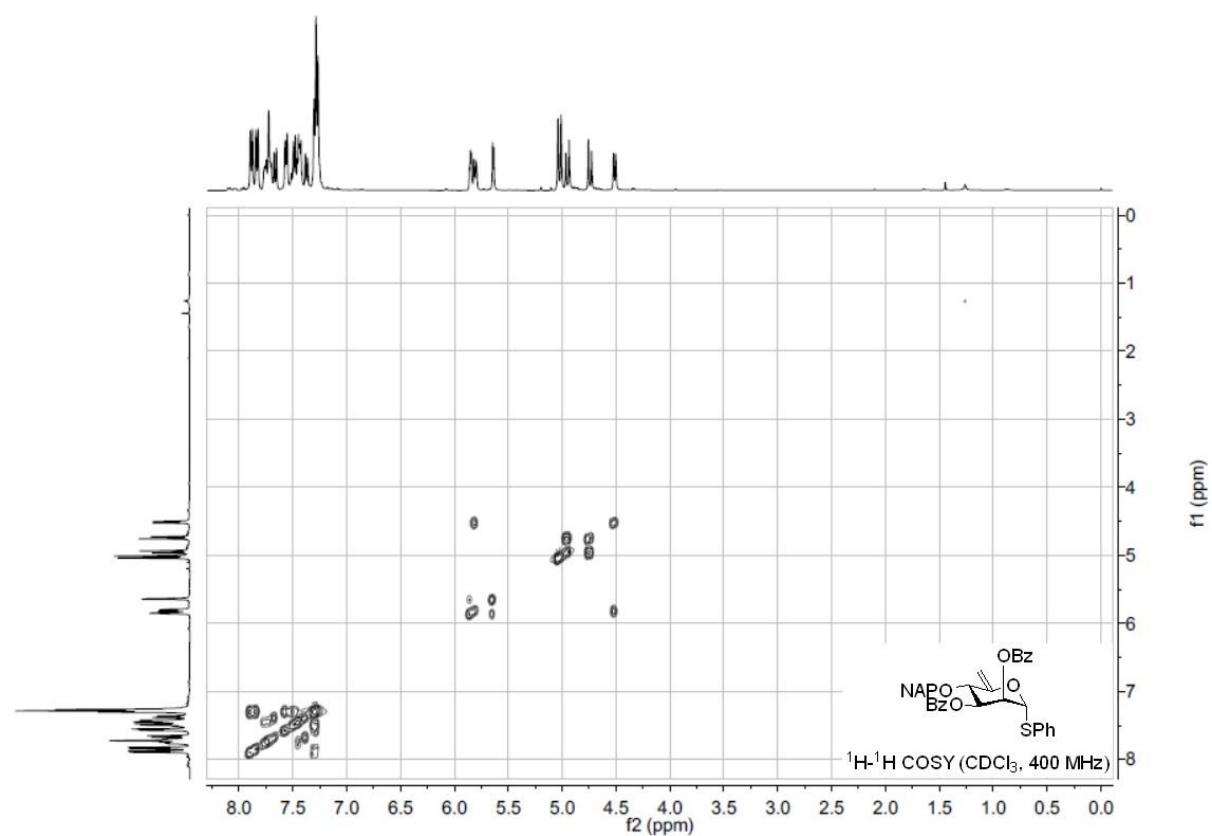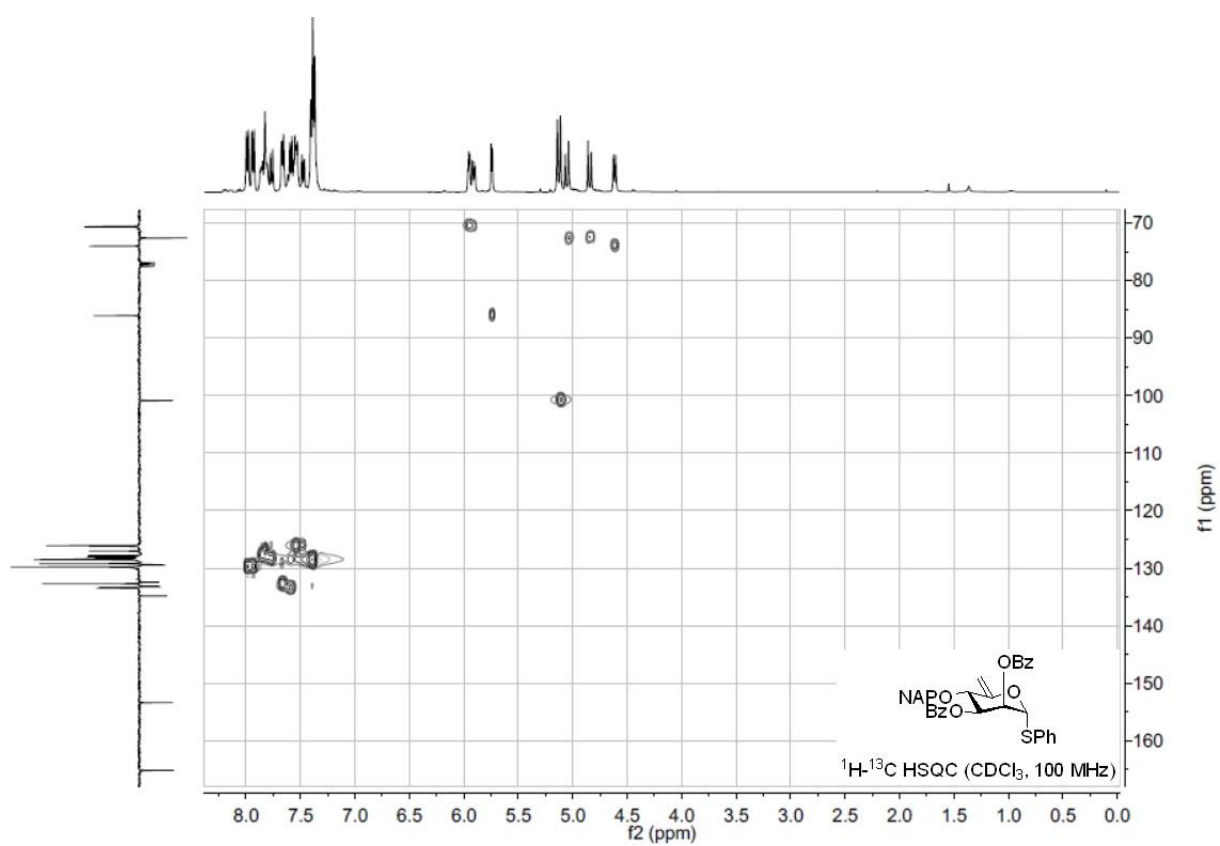

$^1\text{H}$  and  $^{13}\text{C}$  NMR spectra of compound **46**

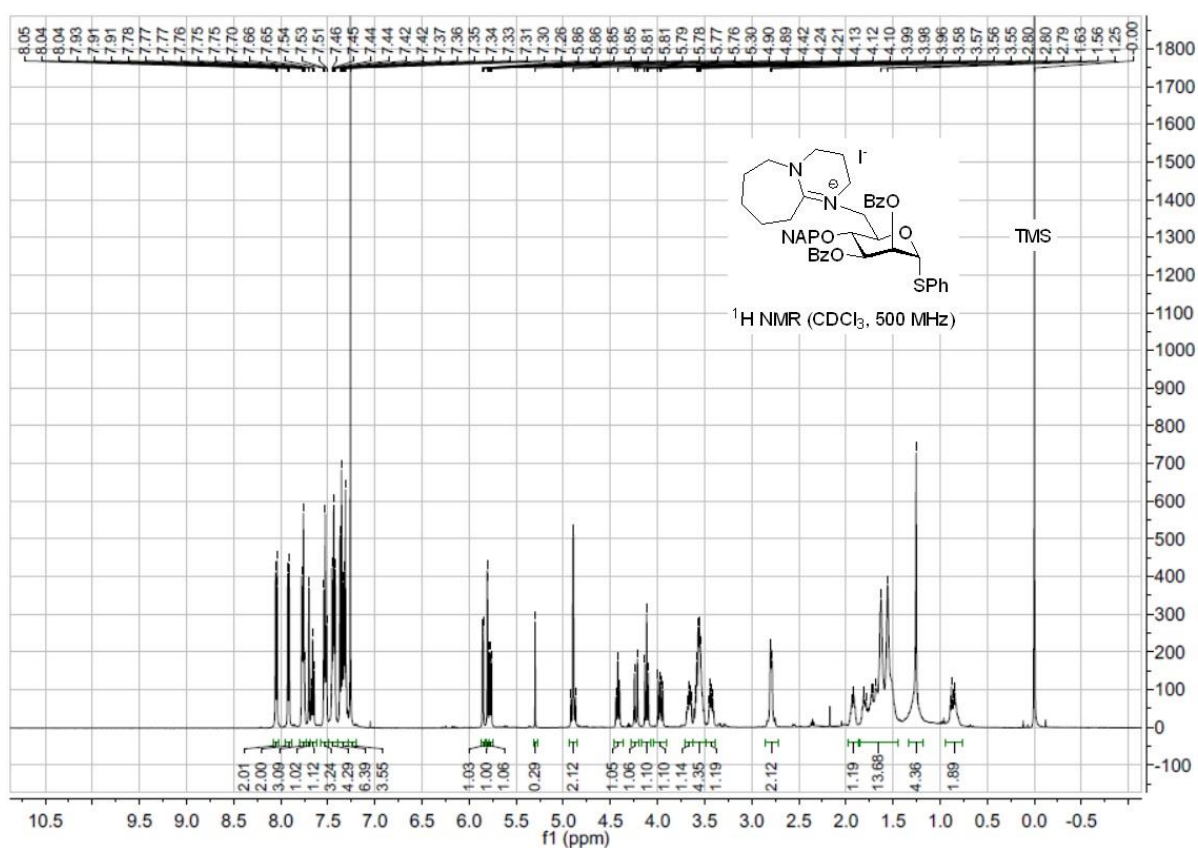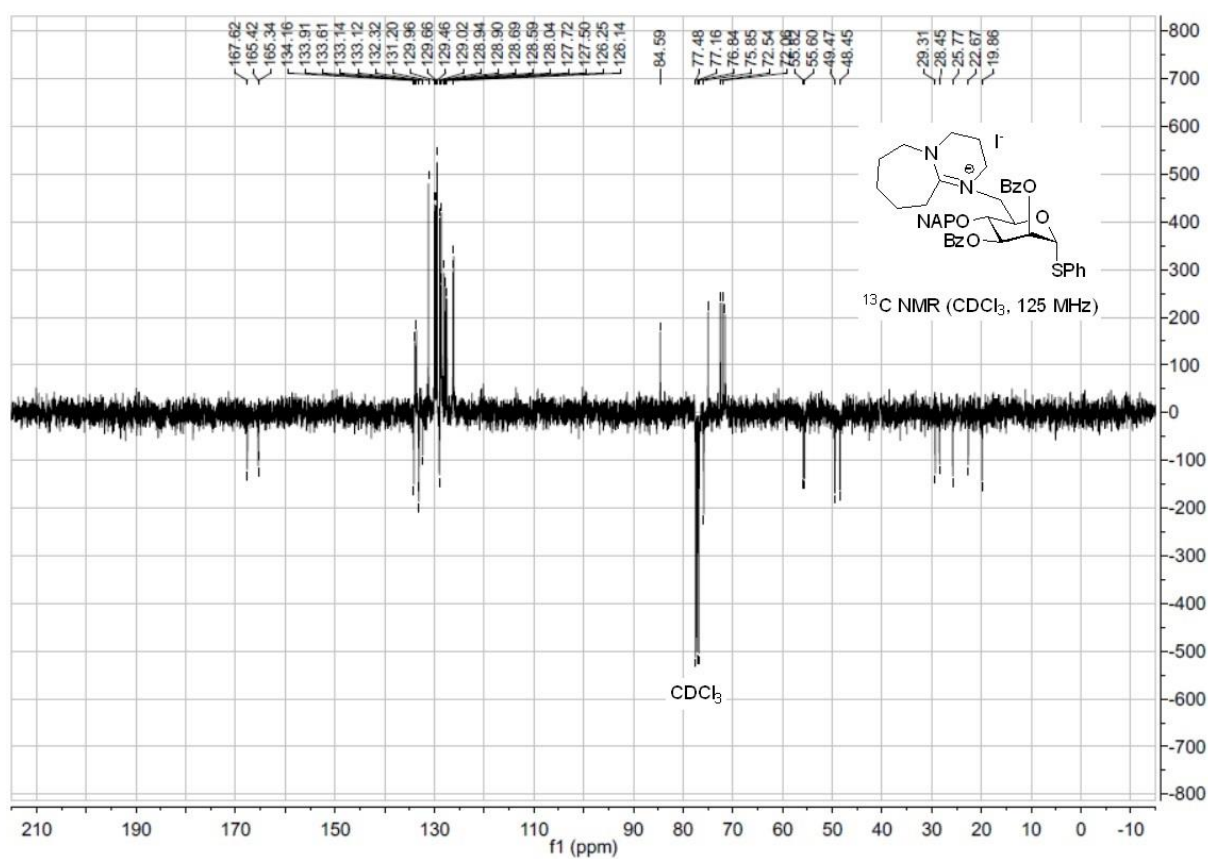

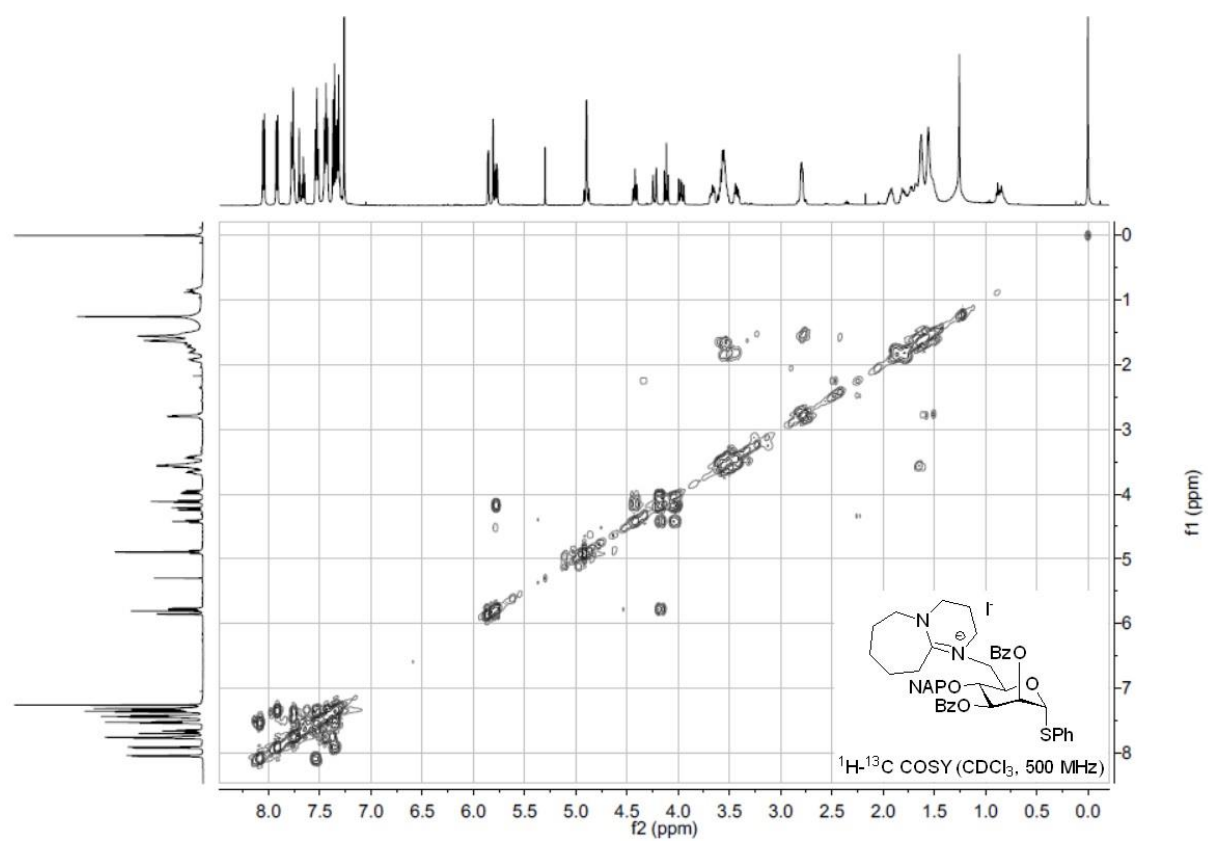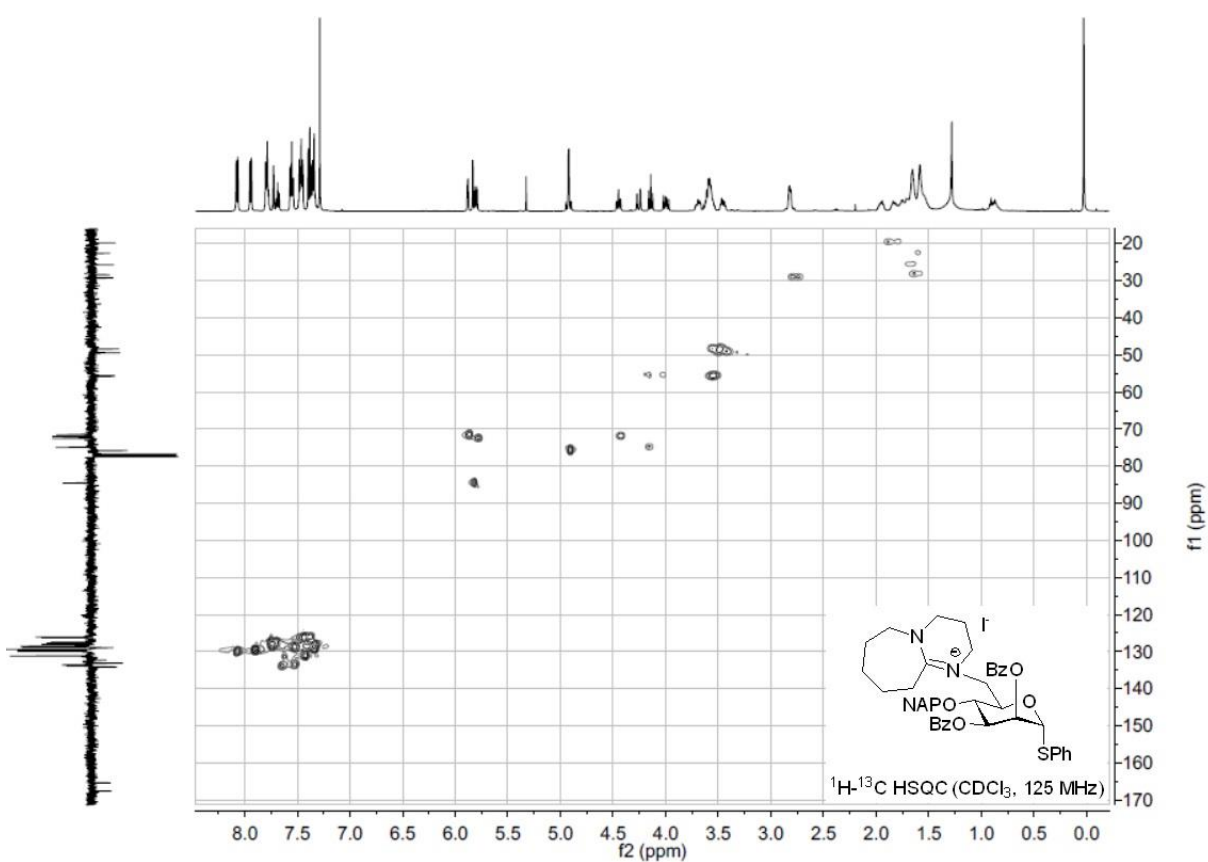

$^1\text{H}$  and  $^{13}\text{C}$  NMR spectra of compound 47

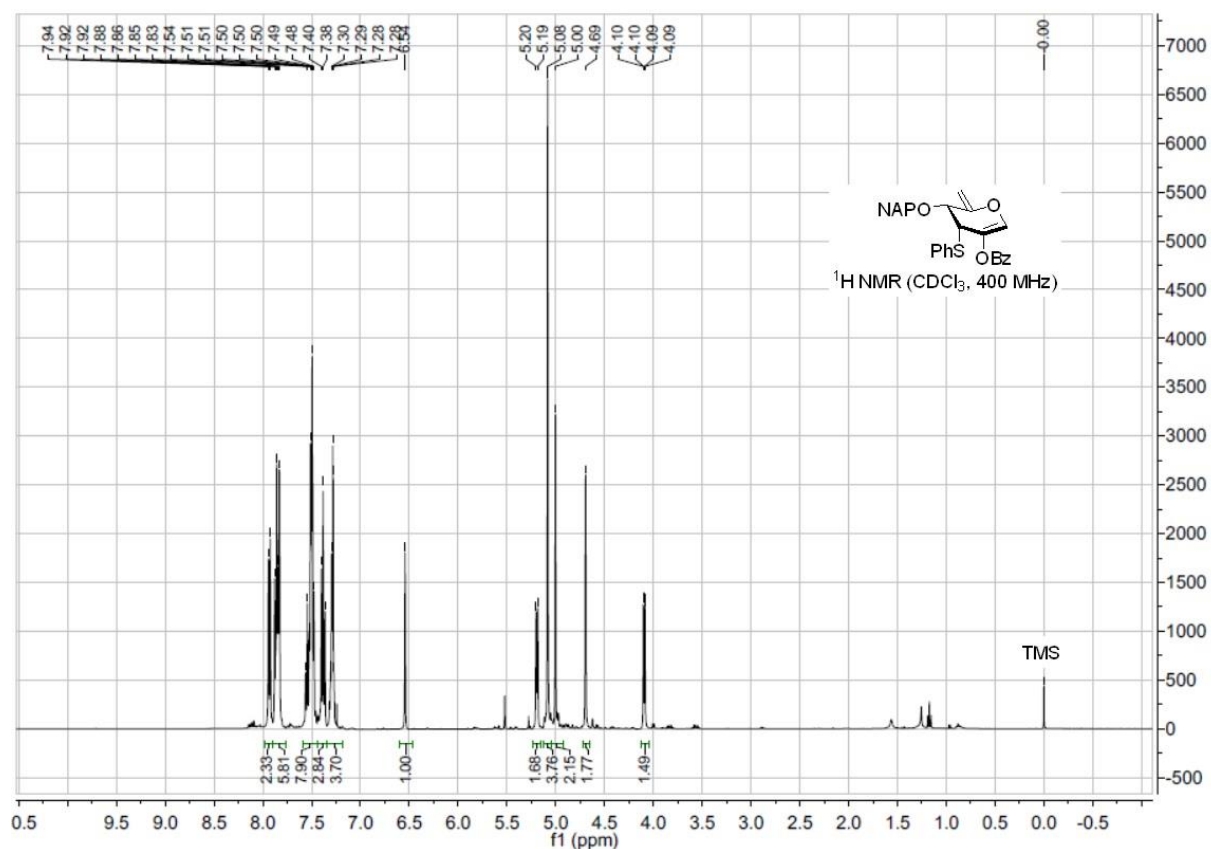



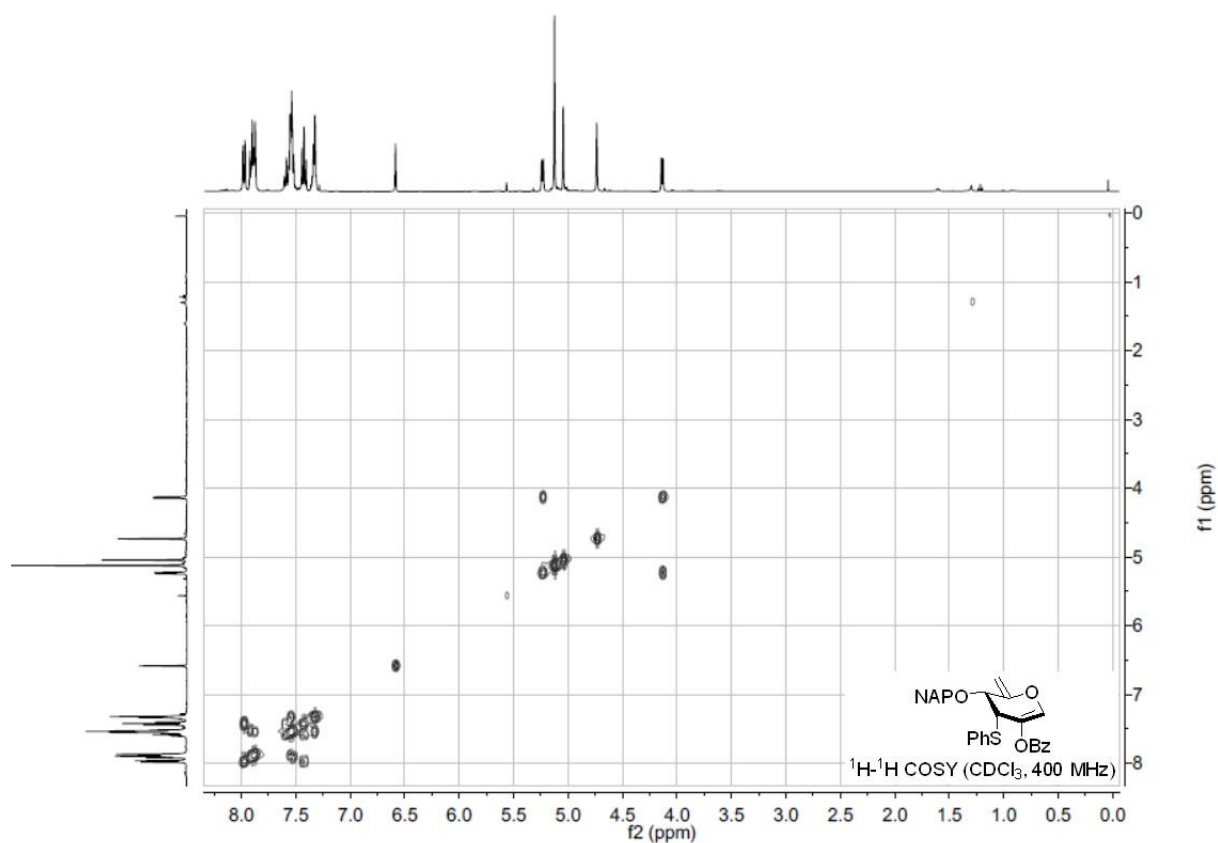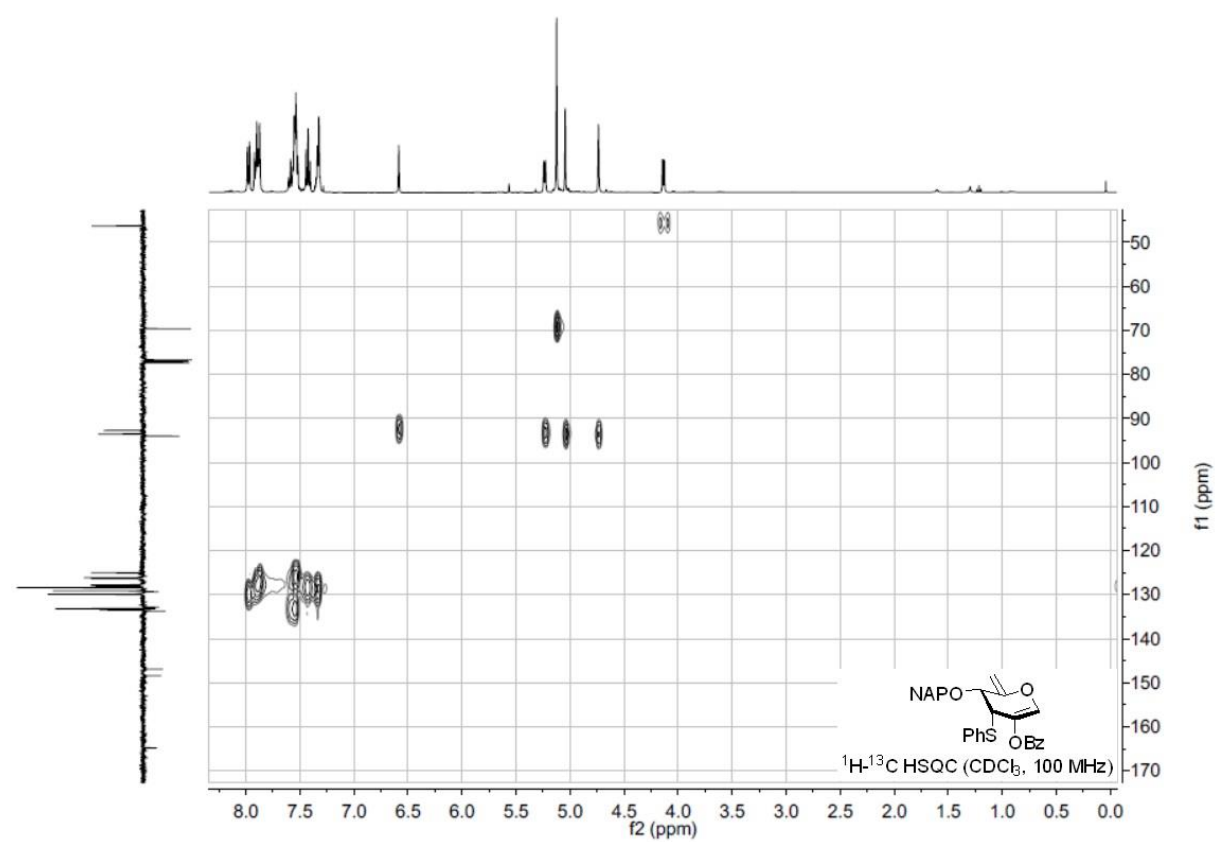

$^1\text{H}$  and  $^{13}\text{C}$  NMR spectra of compound 48

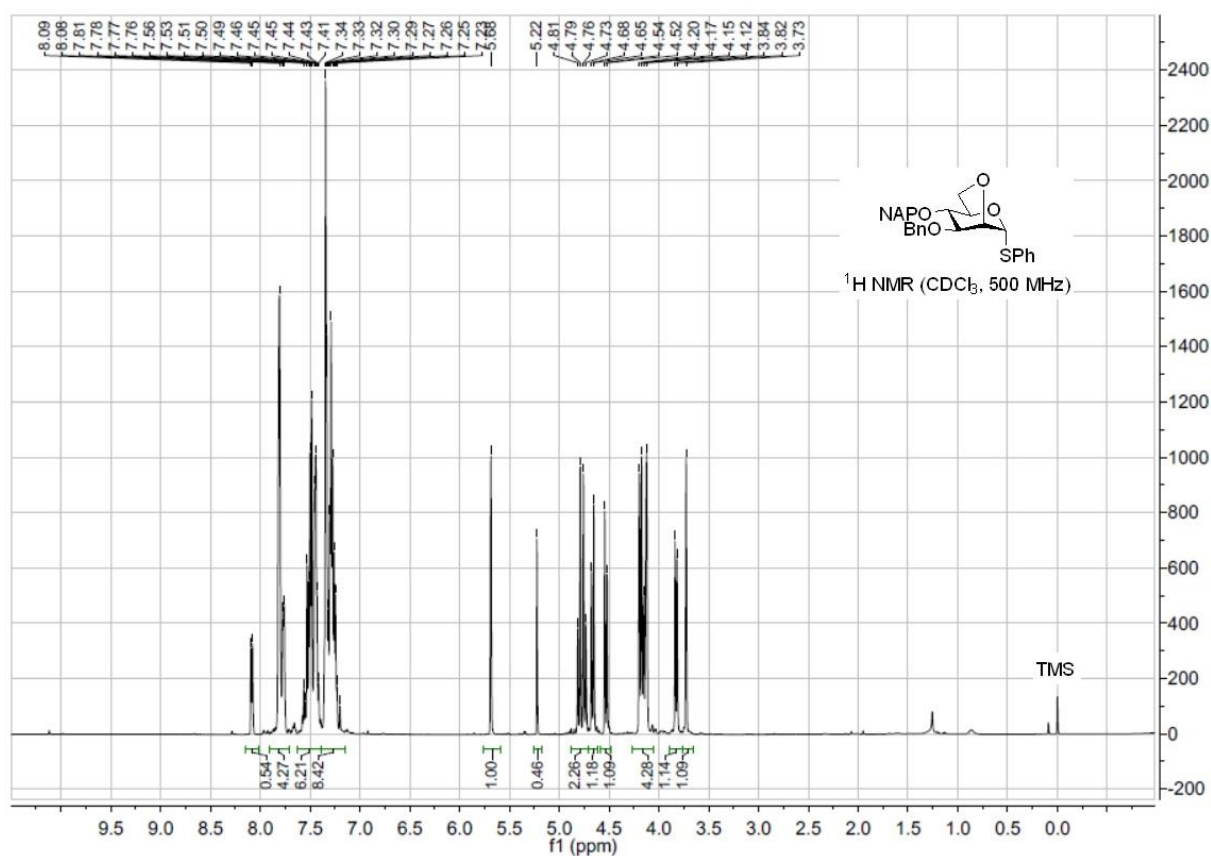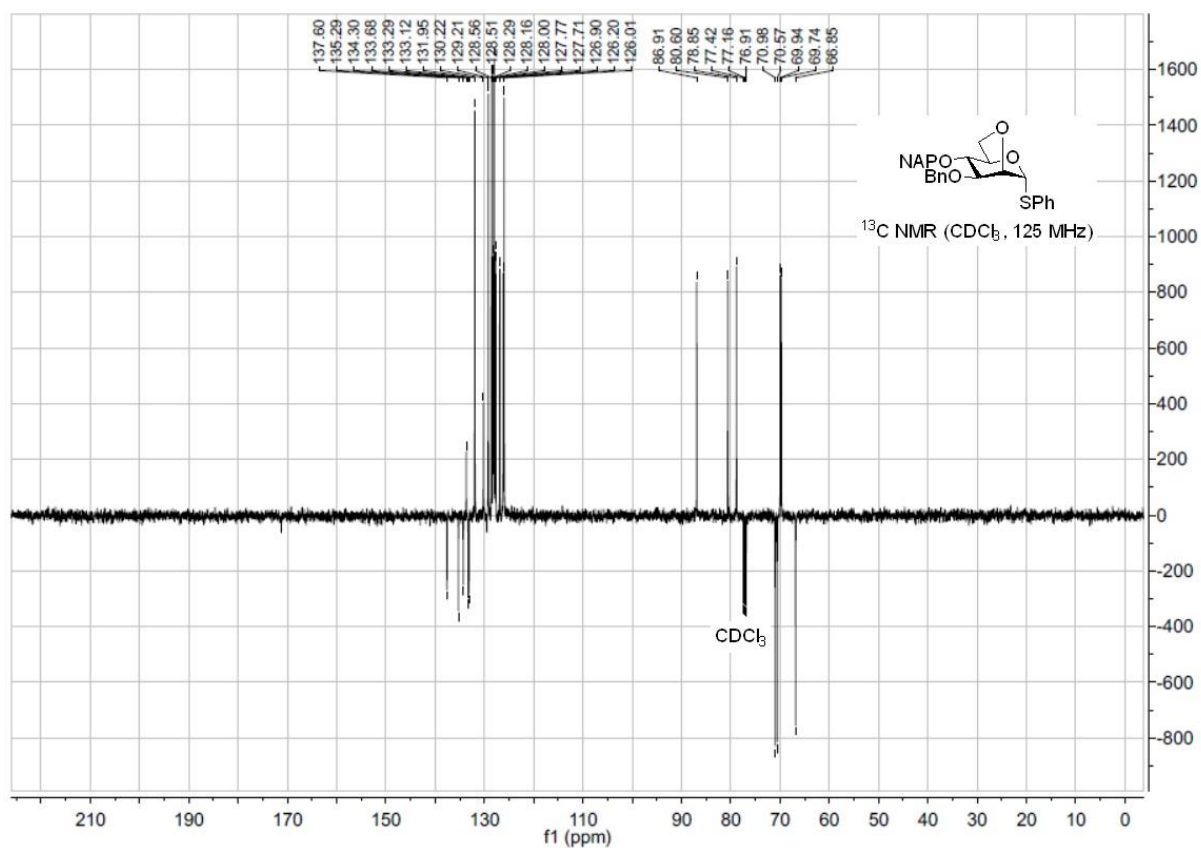

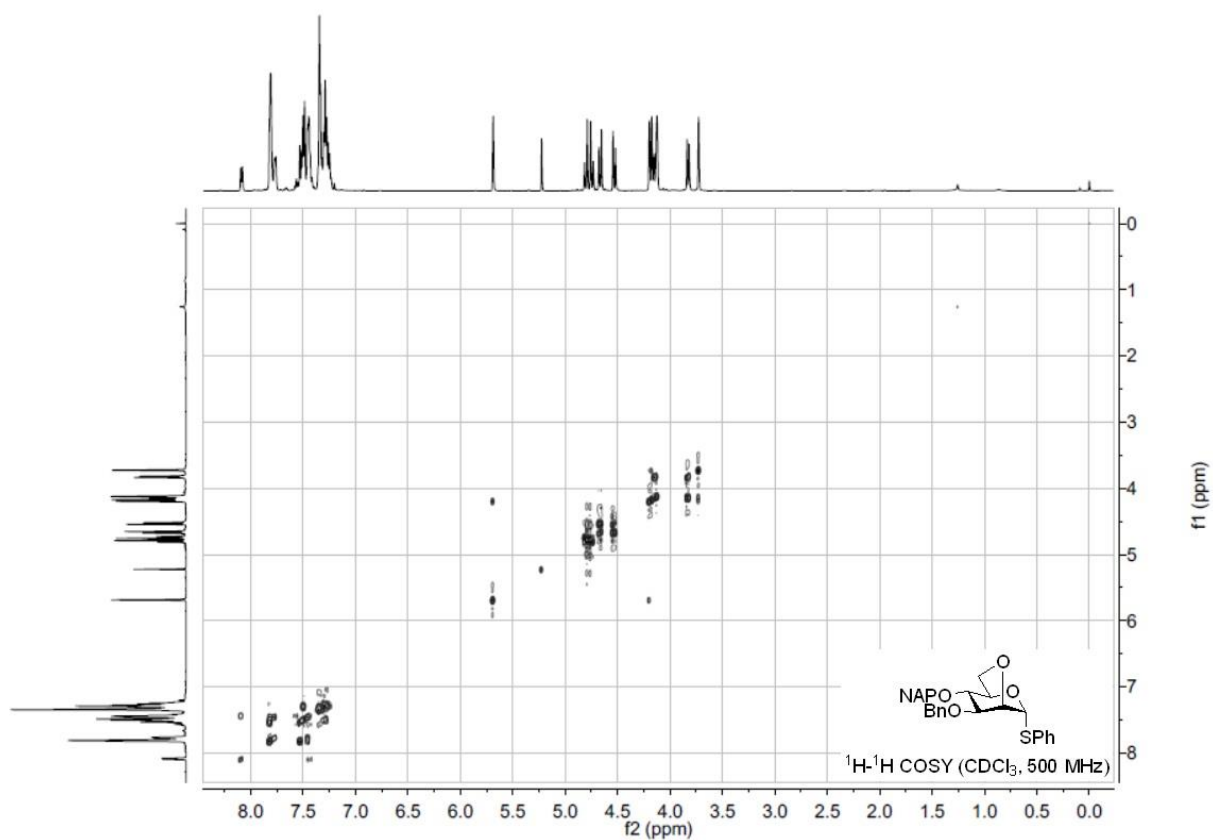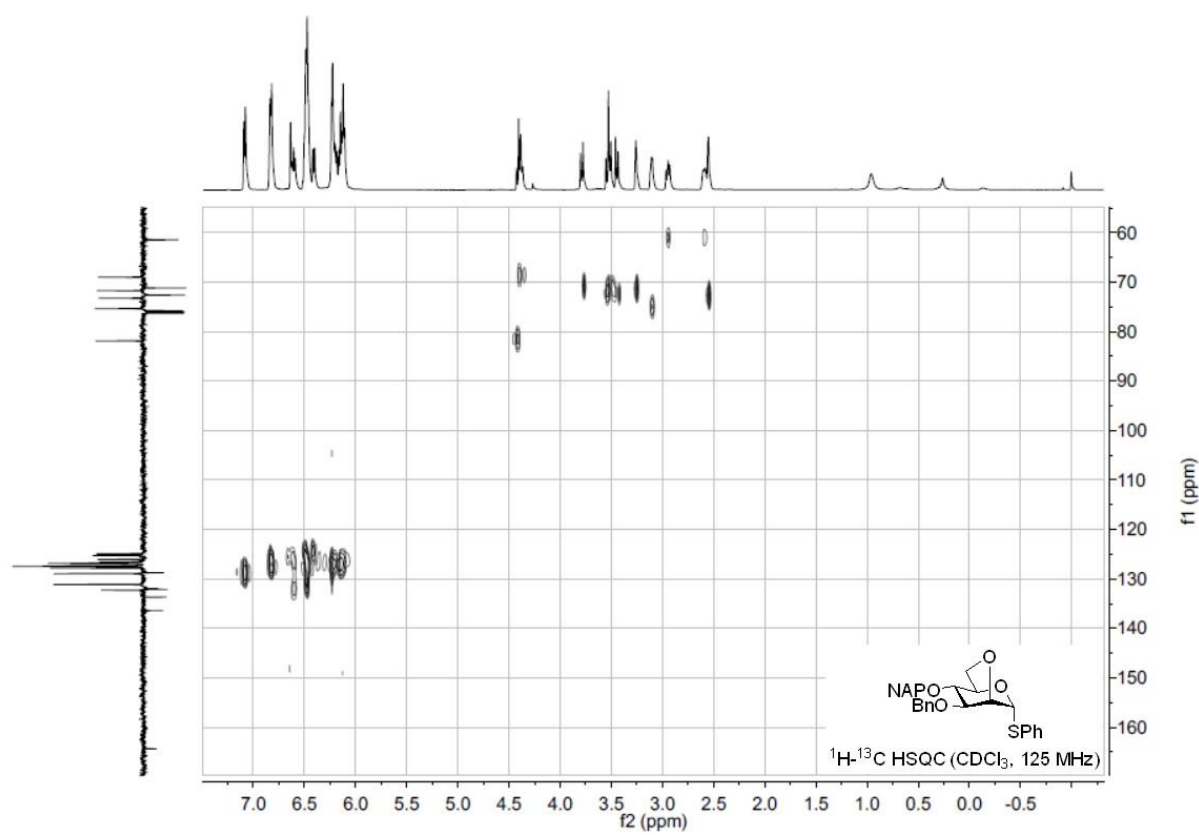

$^1\text{H}$  and  $^{13}\text{C}$  NMR spectra of compound **49**

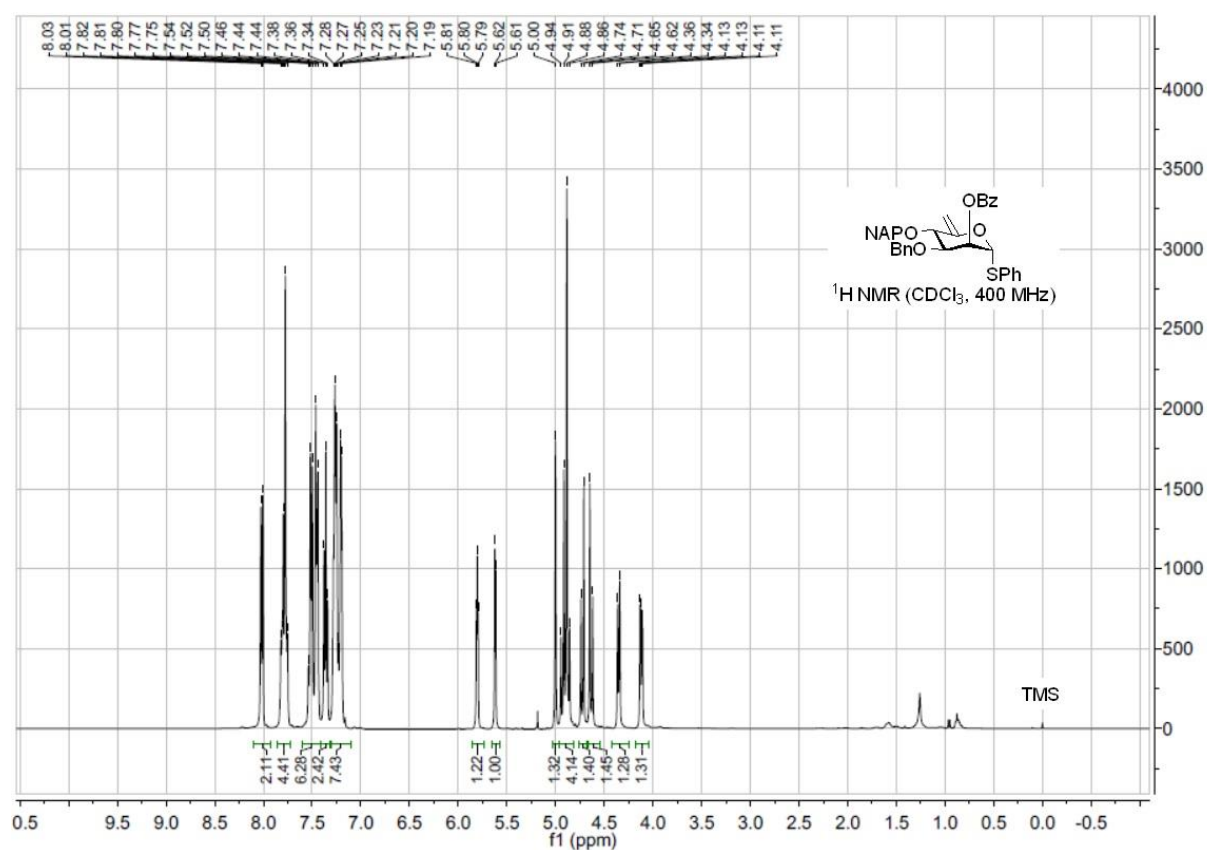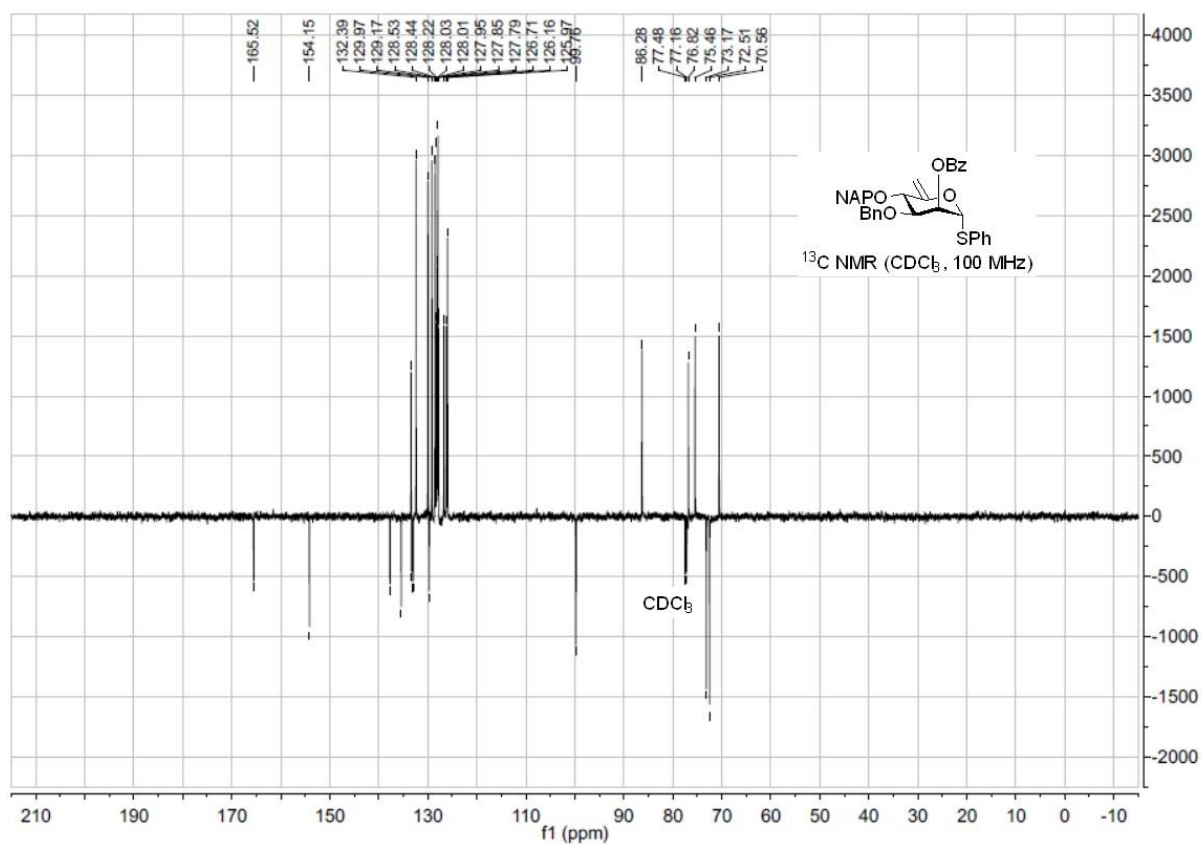

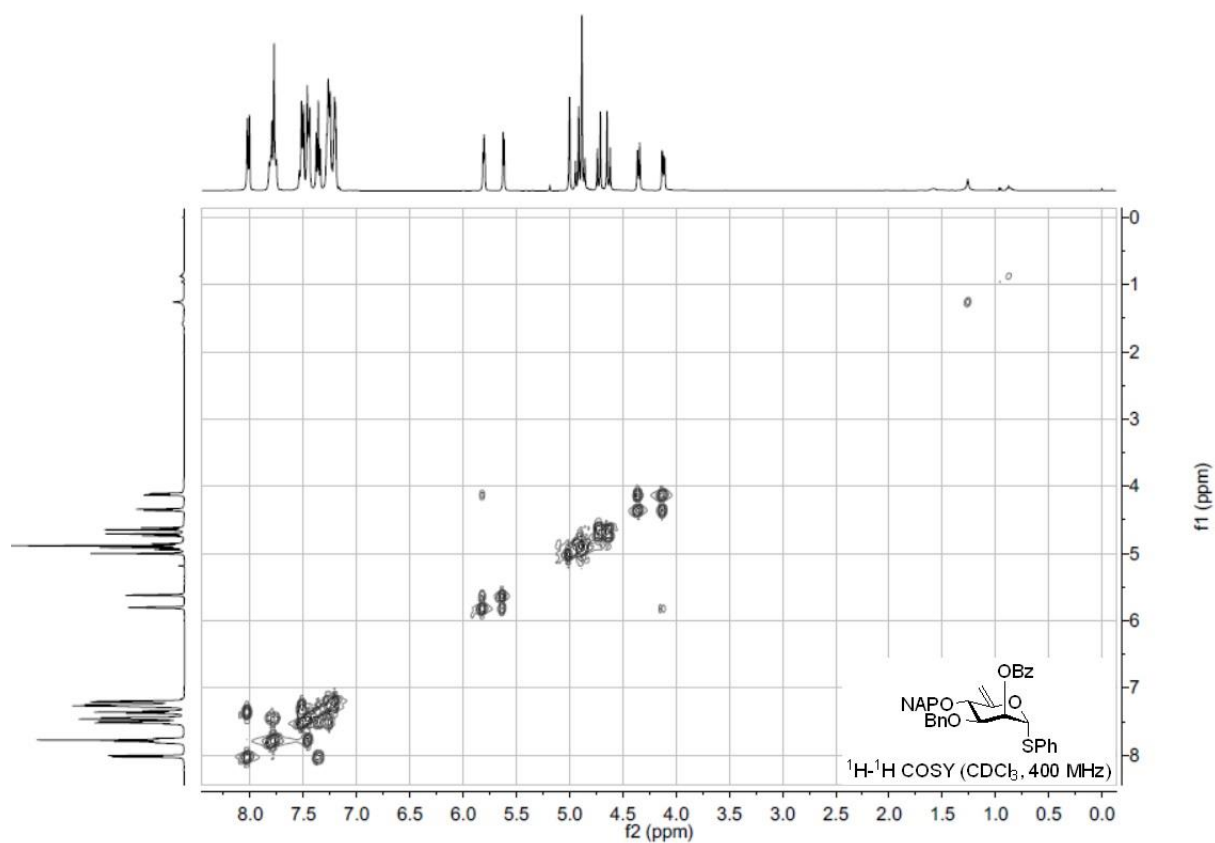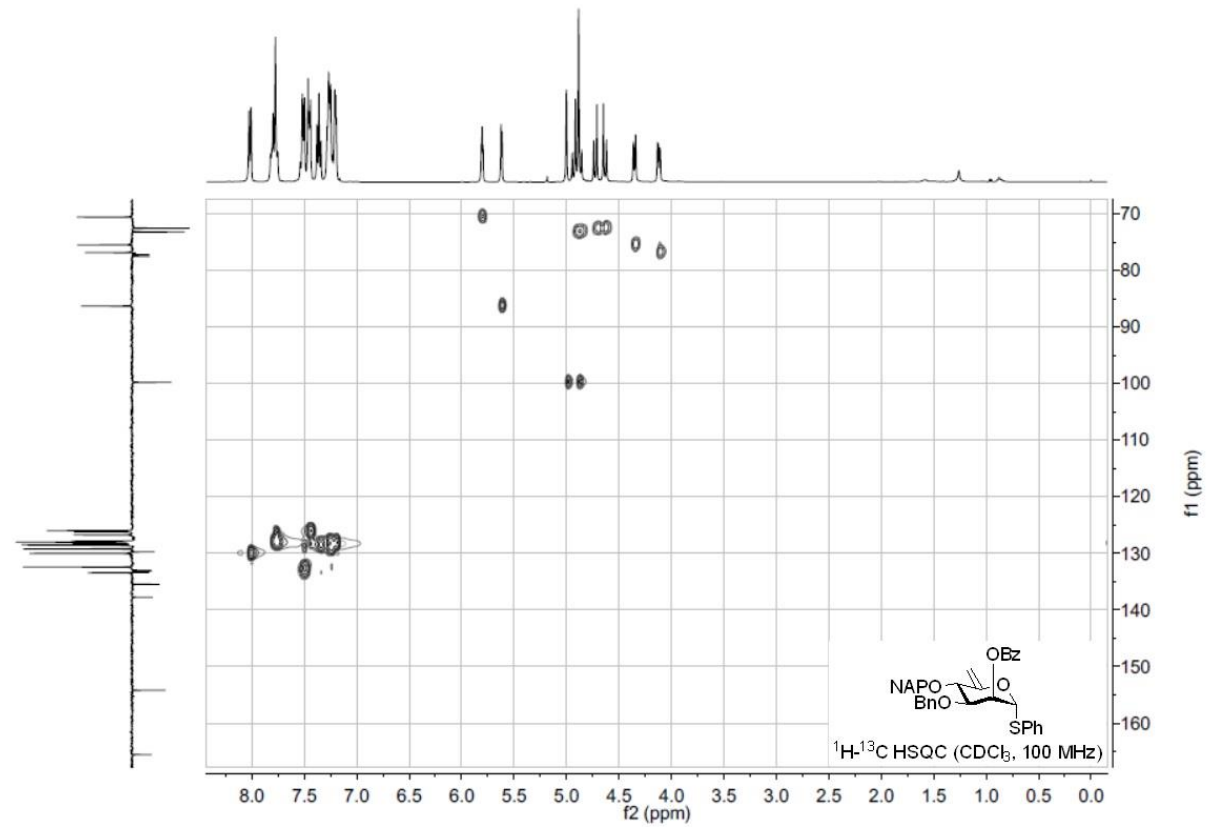

$^1\text{H}$  and  $^{13}\text{C}$  NMR spectra of compound 50

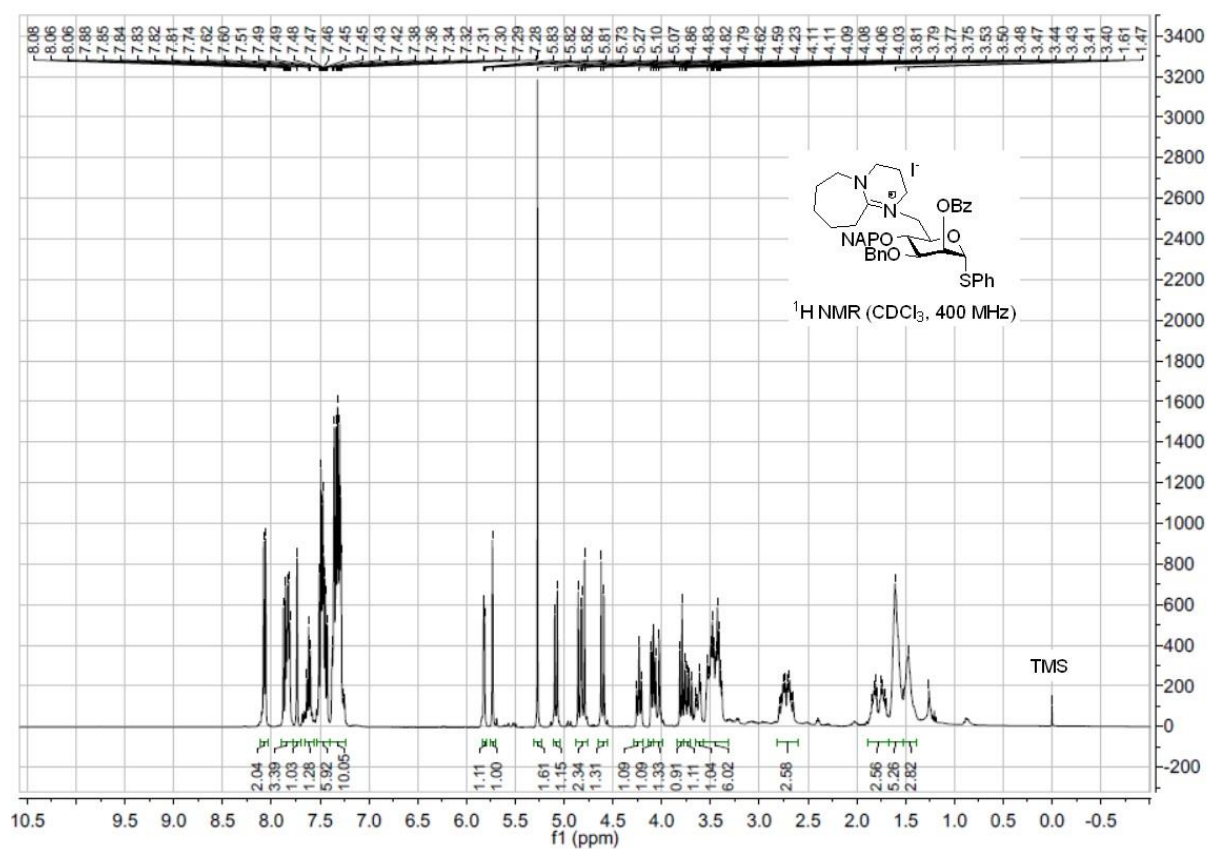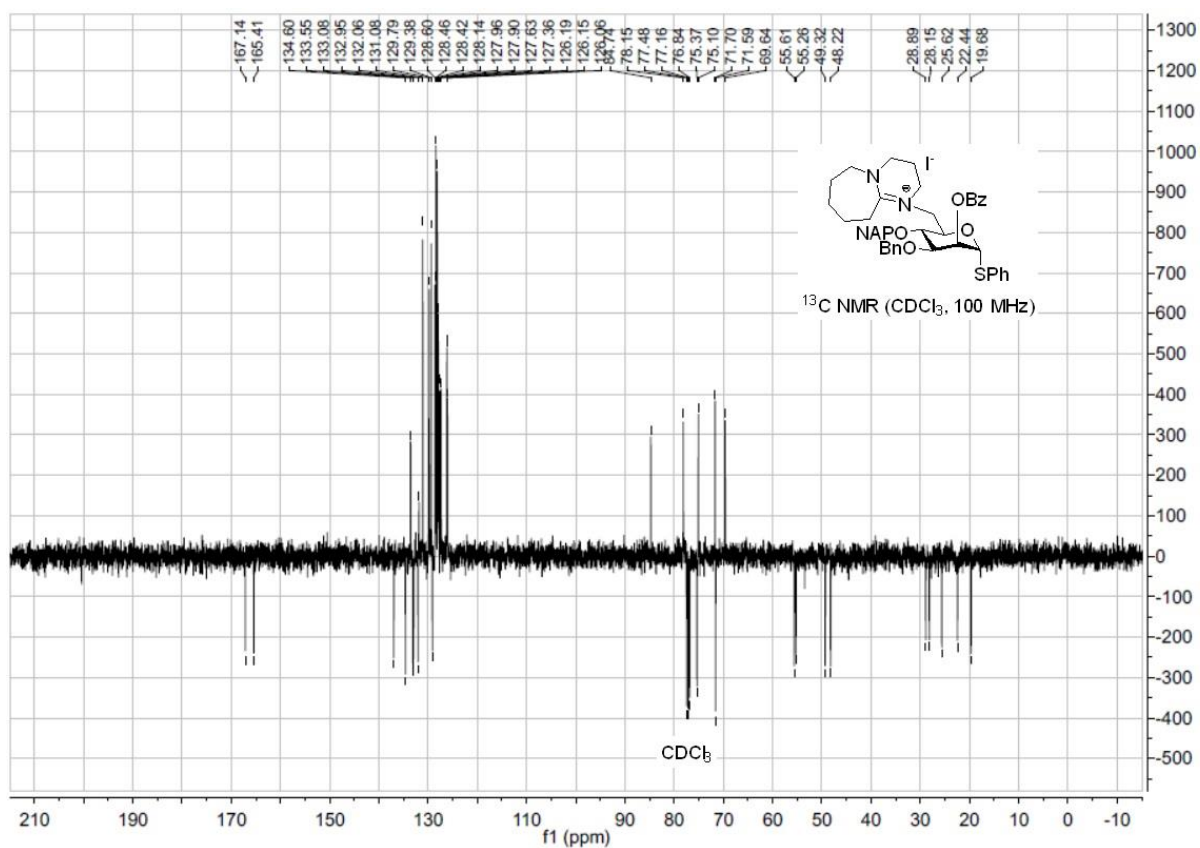

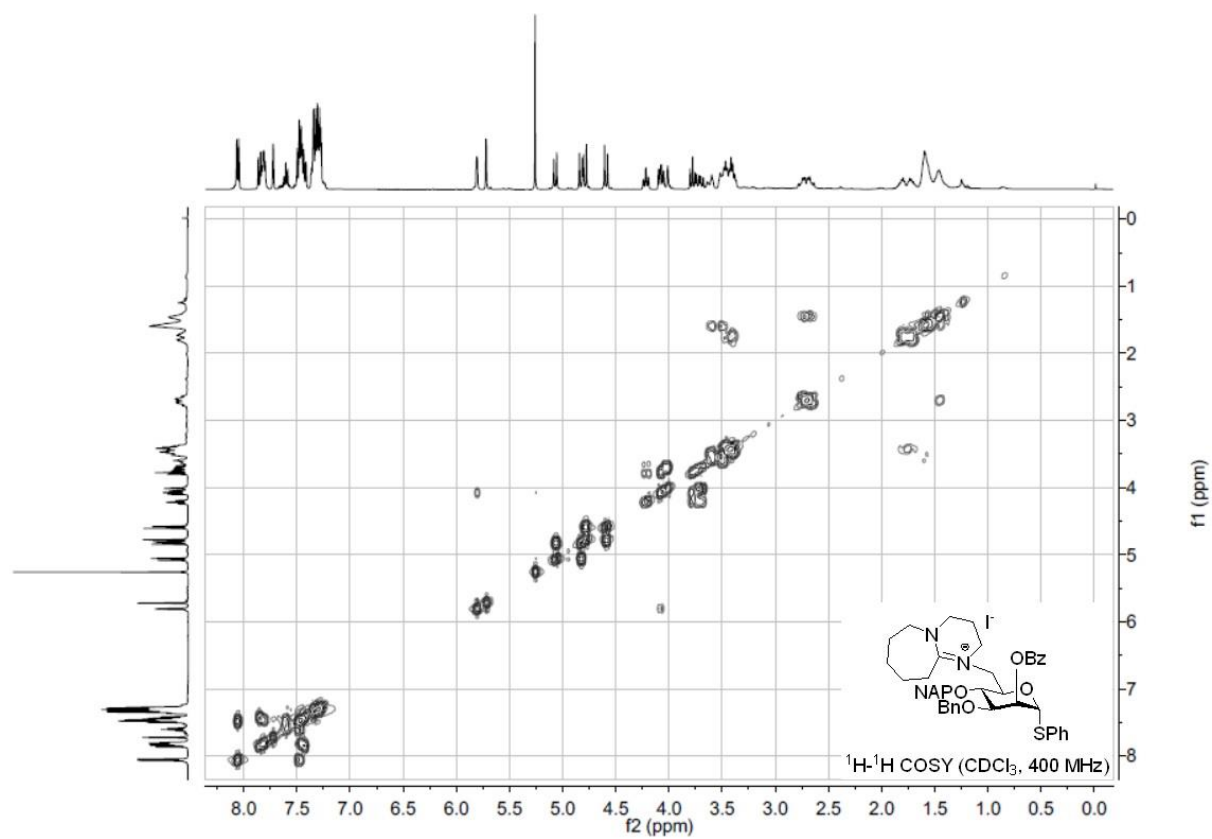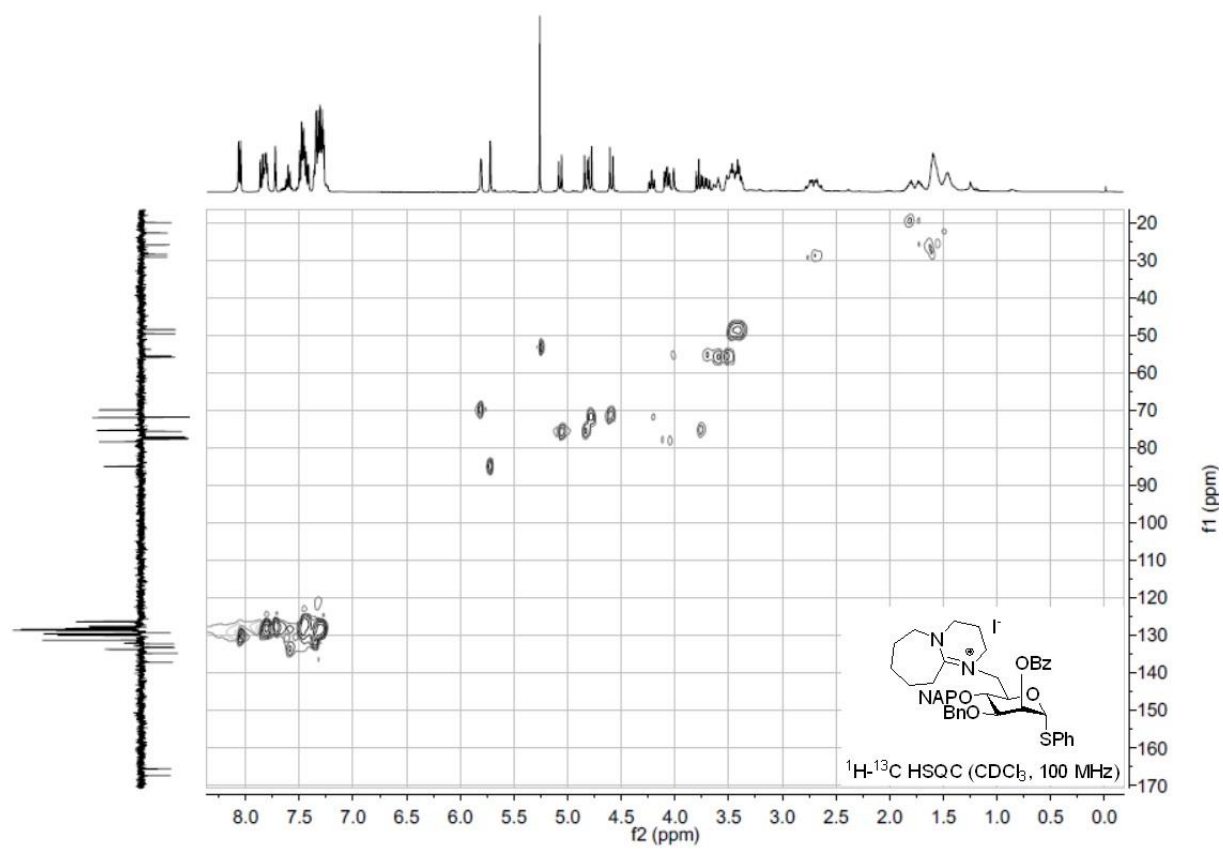



$^1\text{H}$  and  $^{13}\text{C}$  NMR spectra of compound **51**

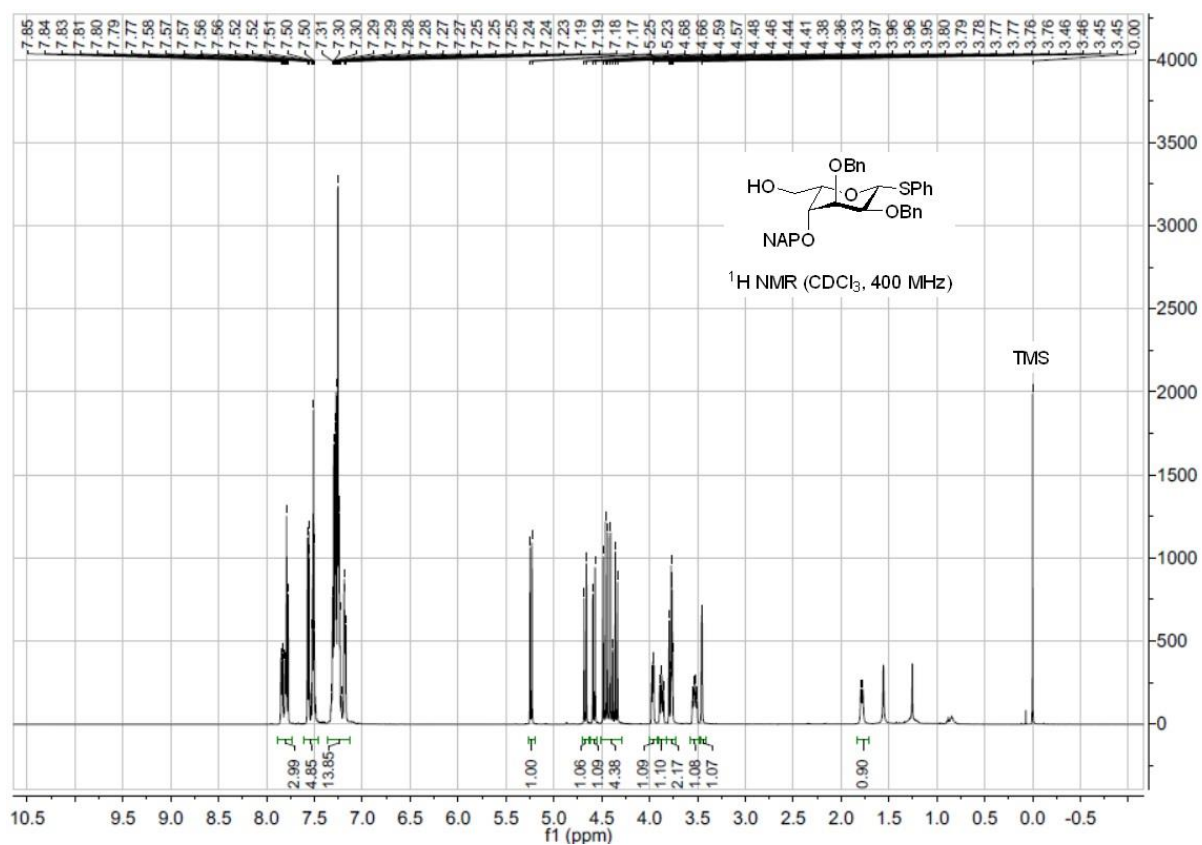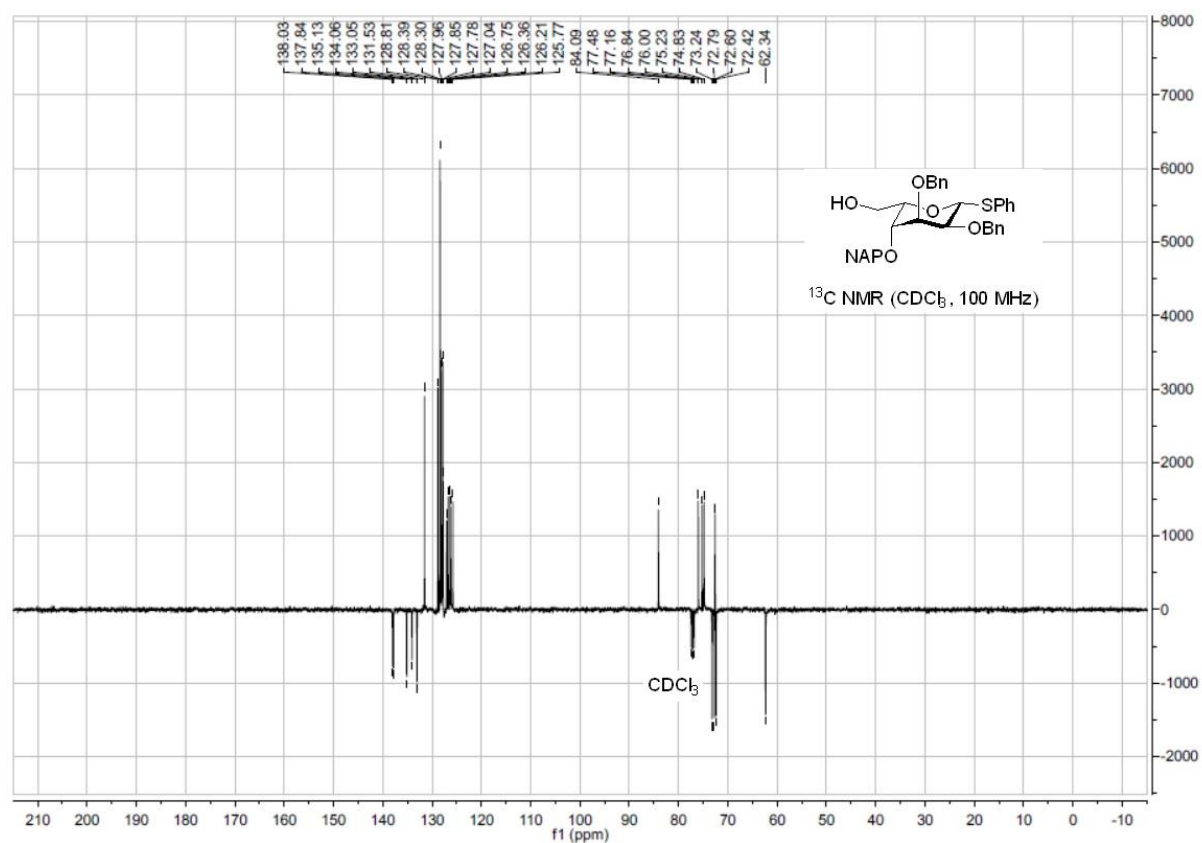

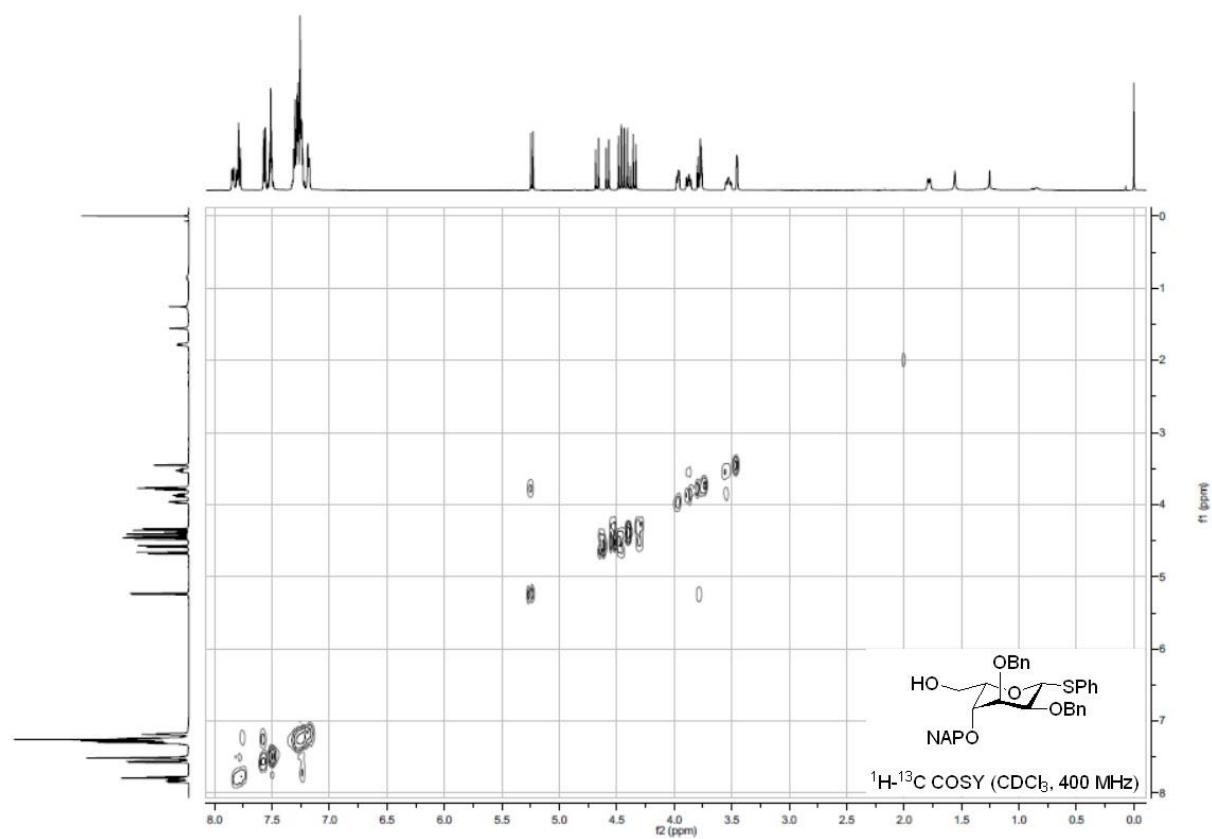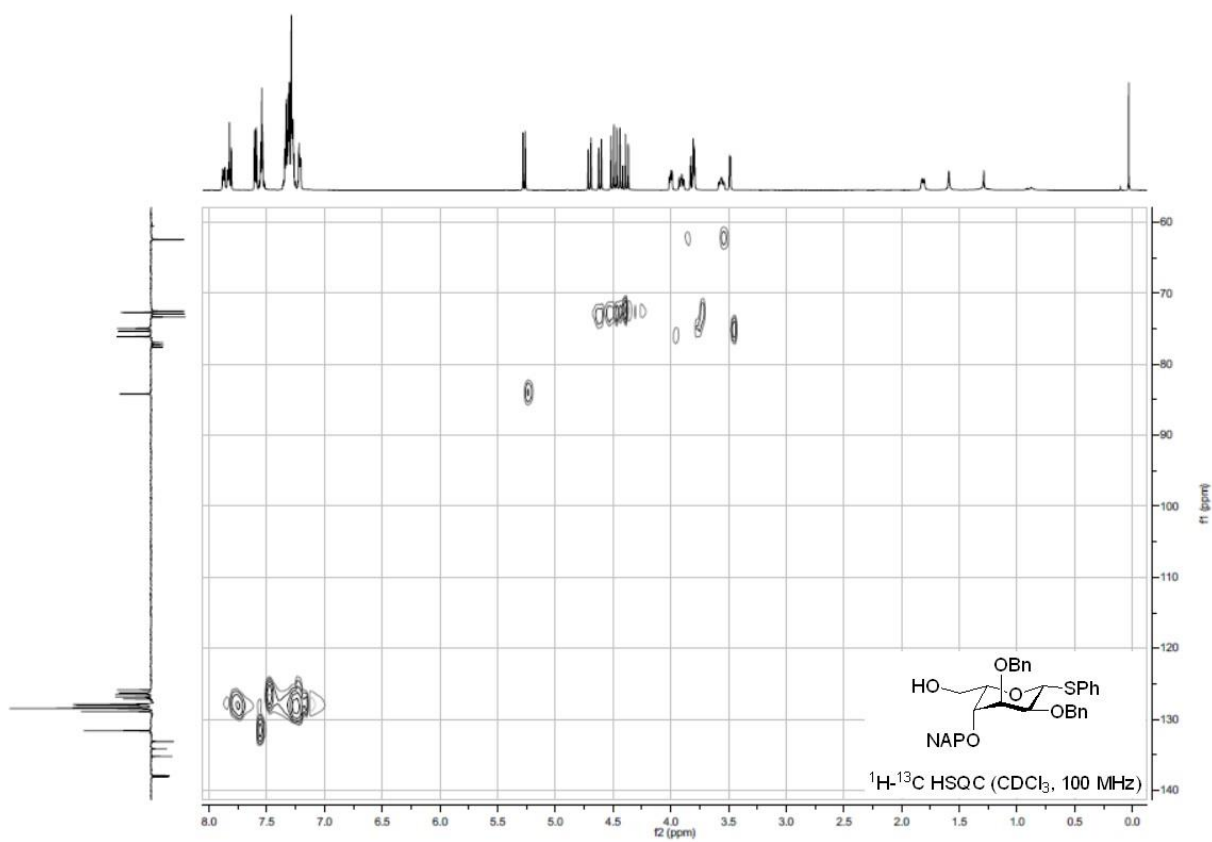

$^1\text{H}$  and  $^{13}\text{C}$  NMR spectra of compound 52

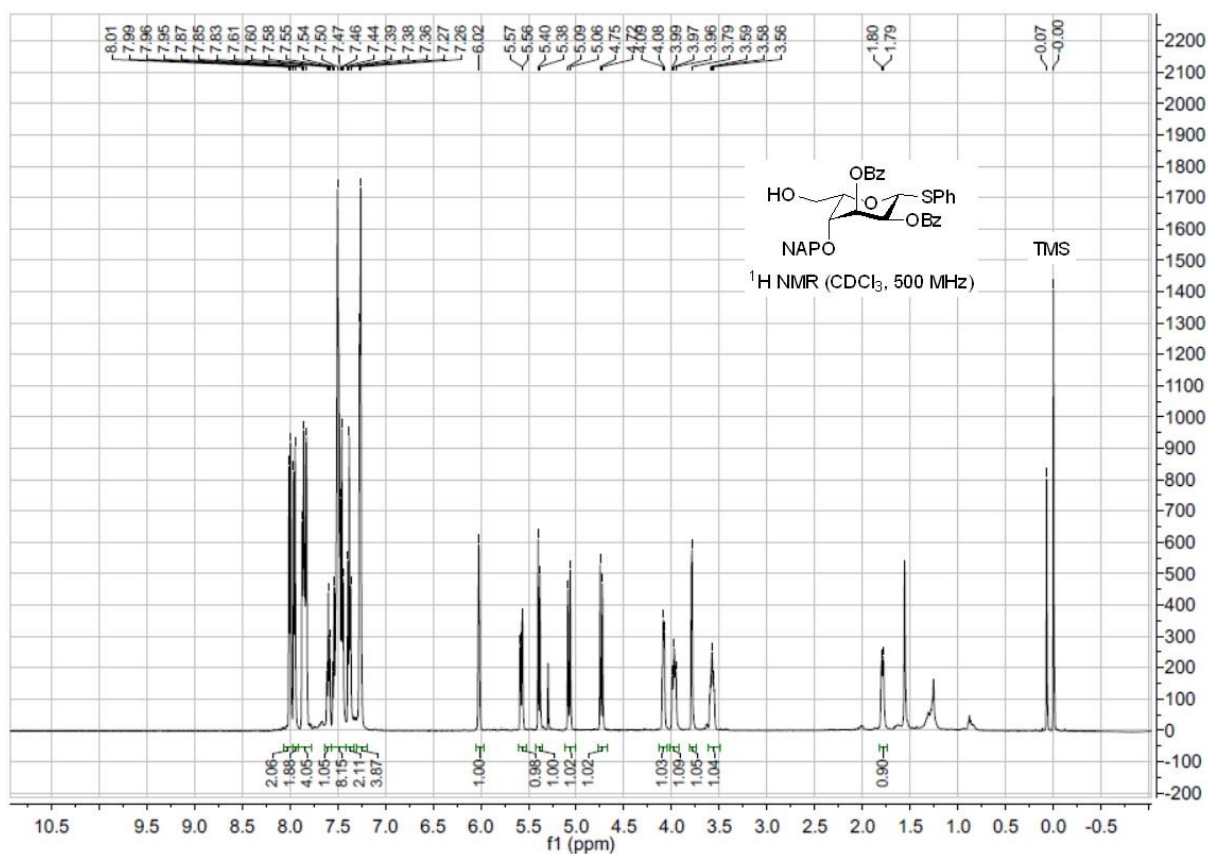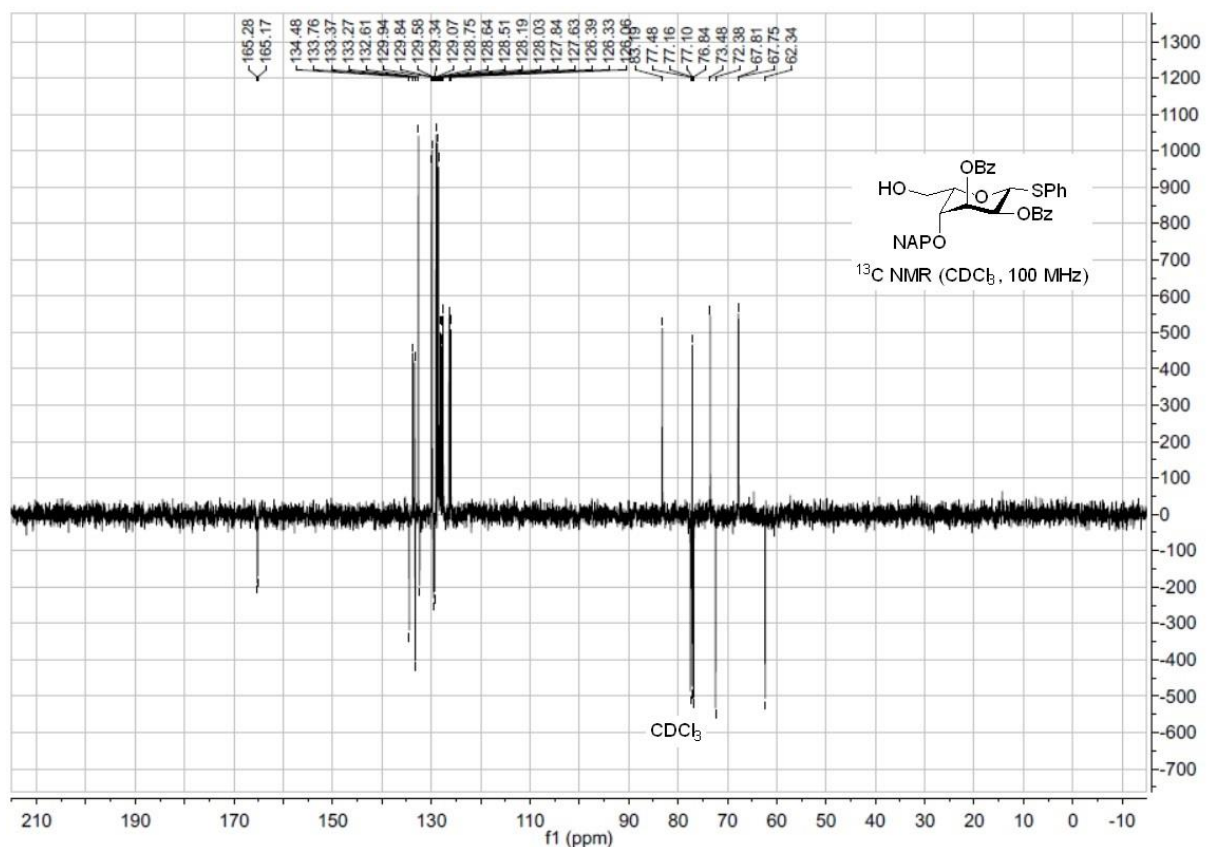

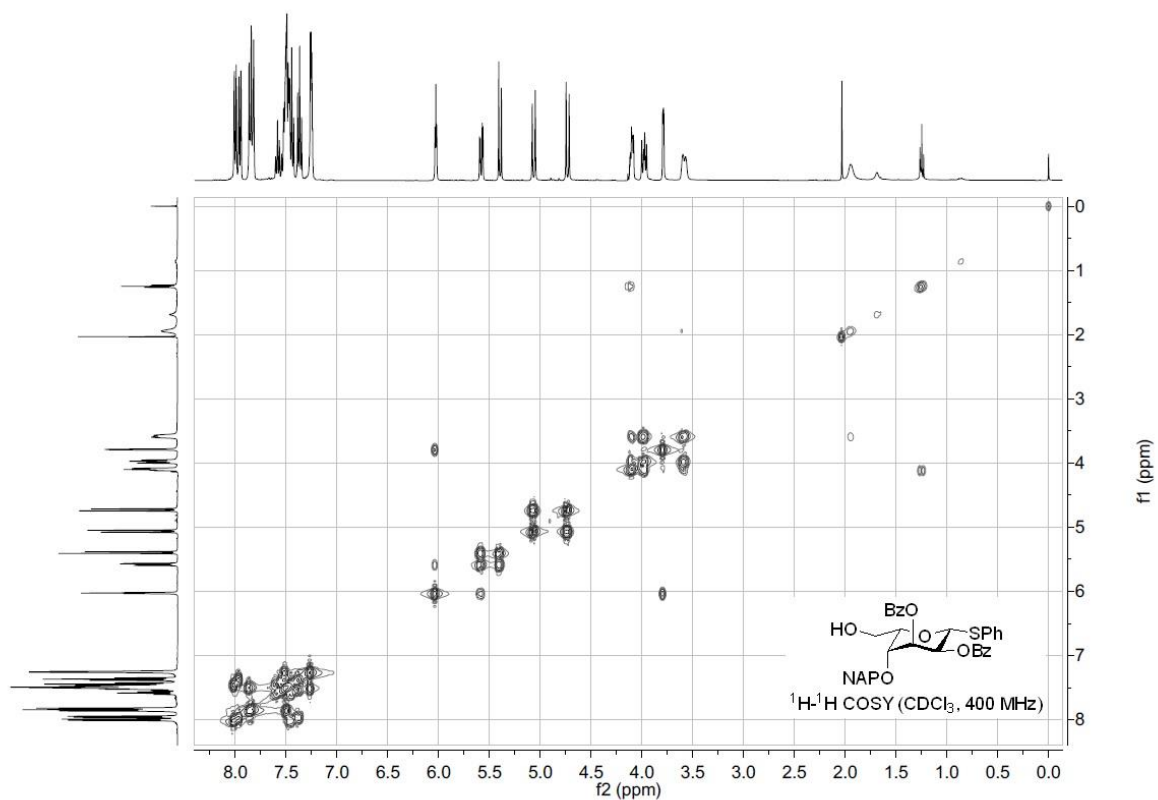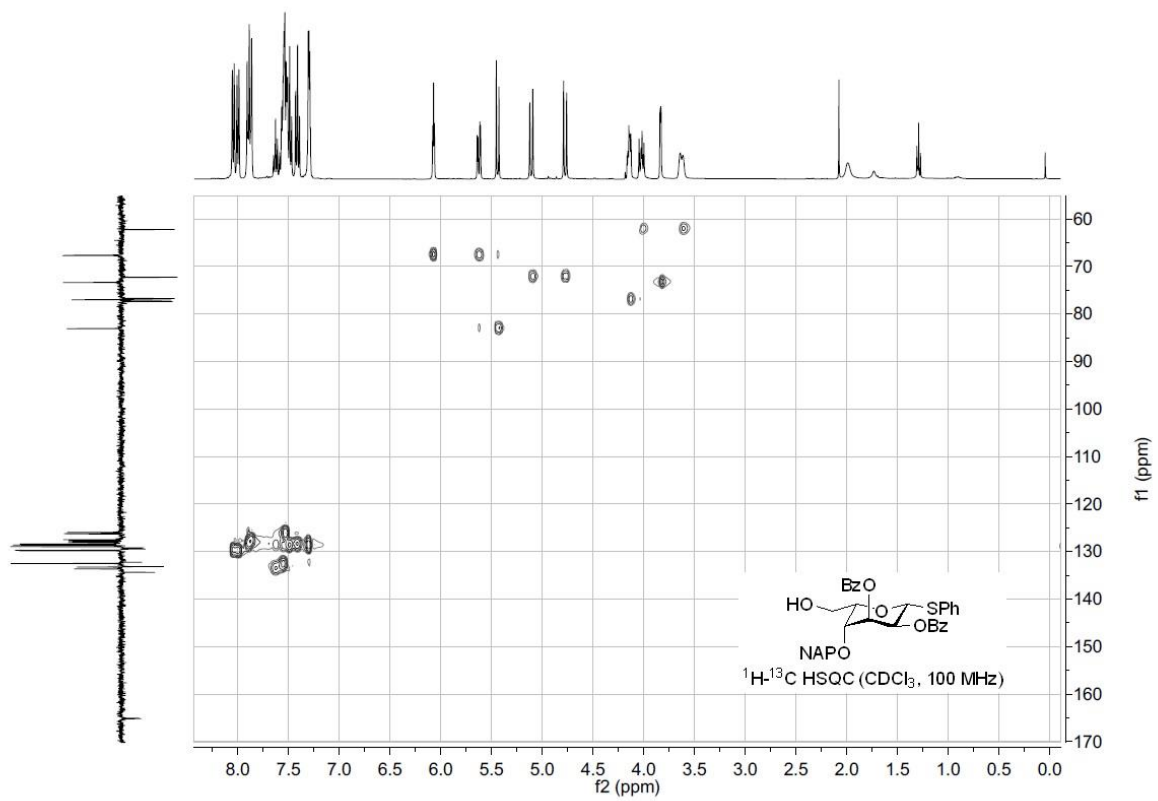

$^1\text{H}$  and  $^{13}\text{C}$  NMR spectra of compound 53

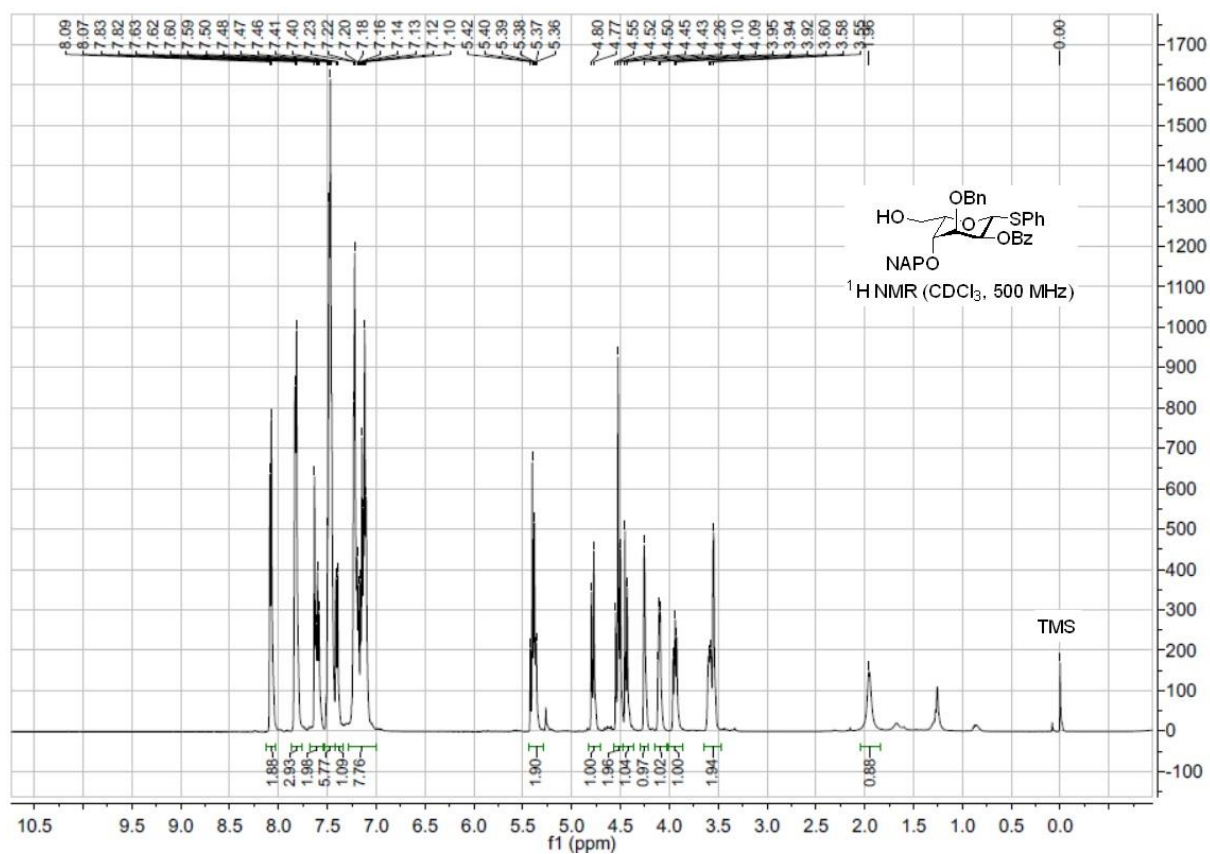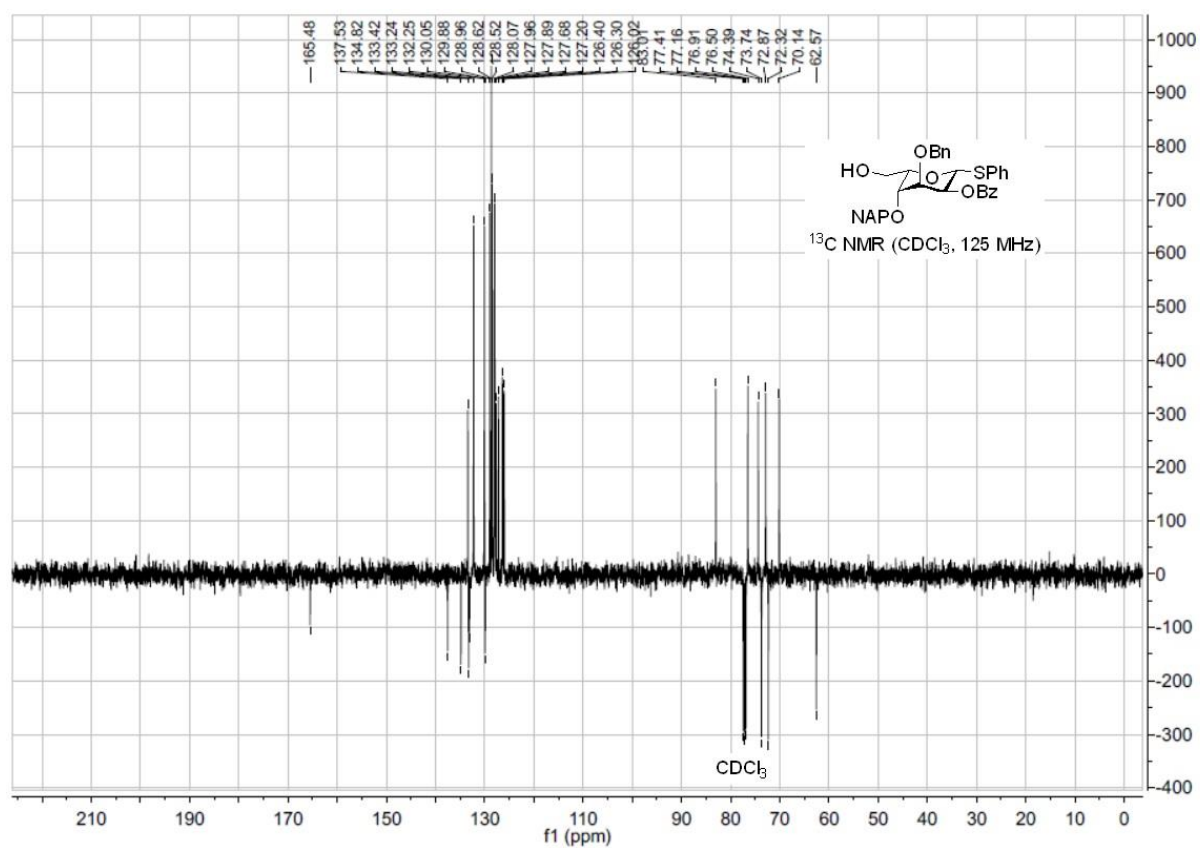

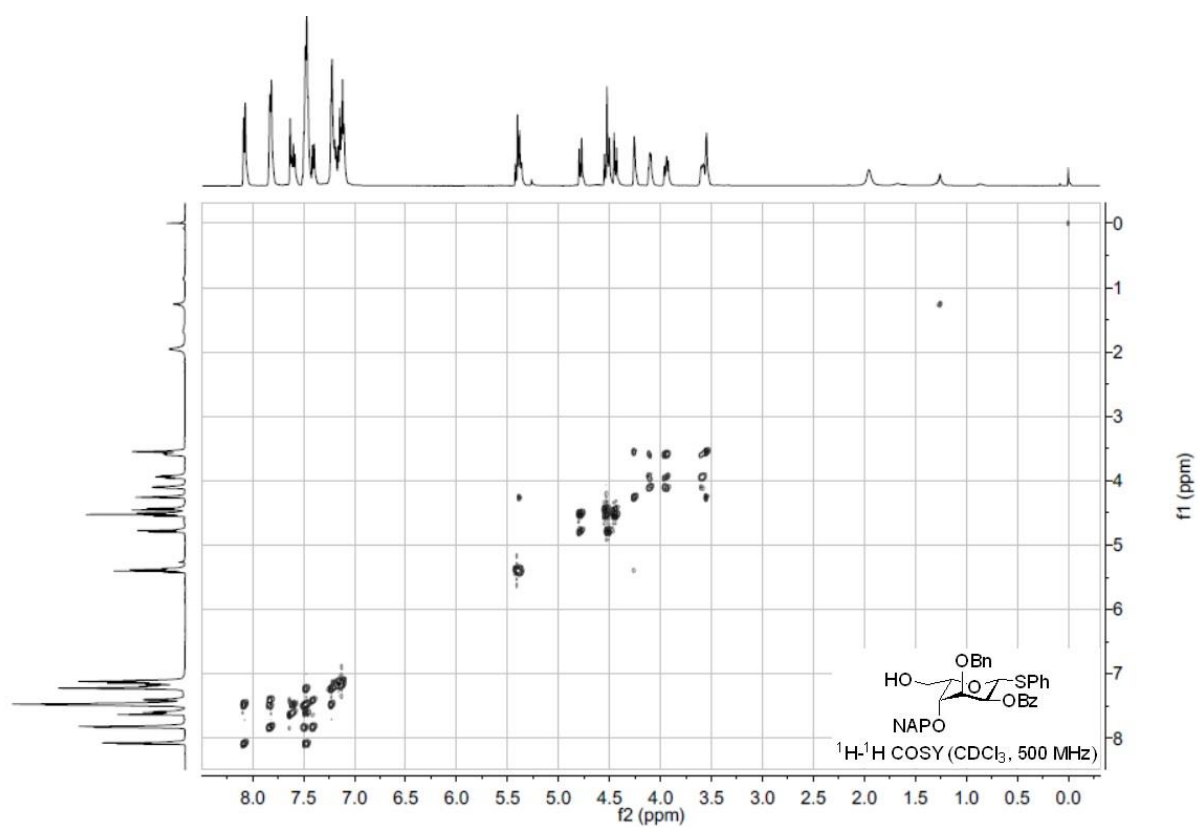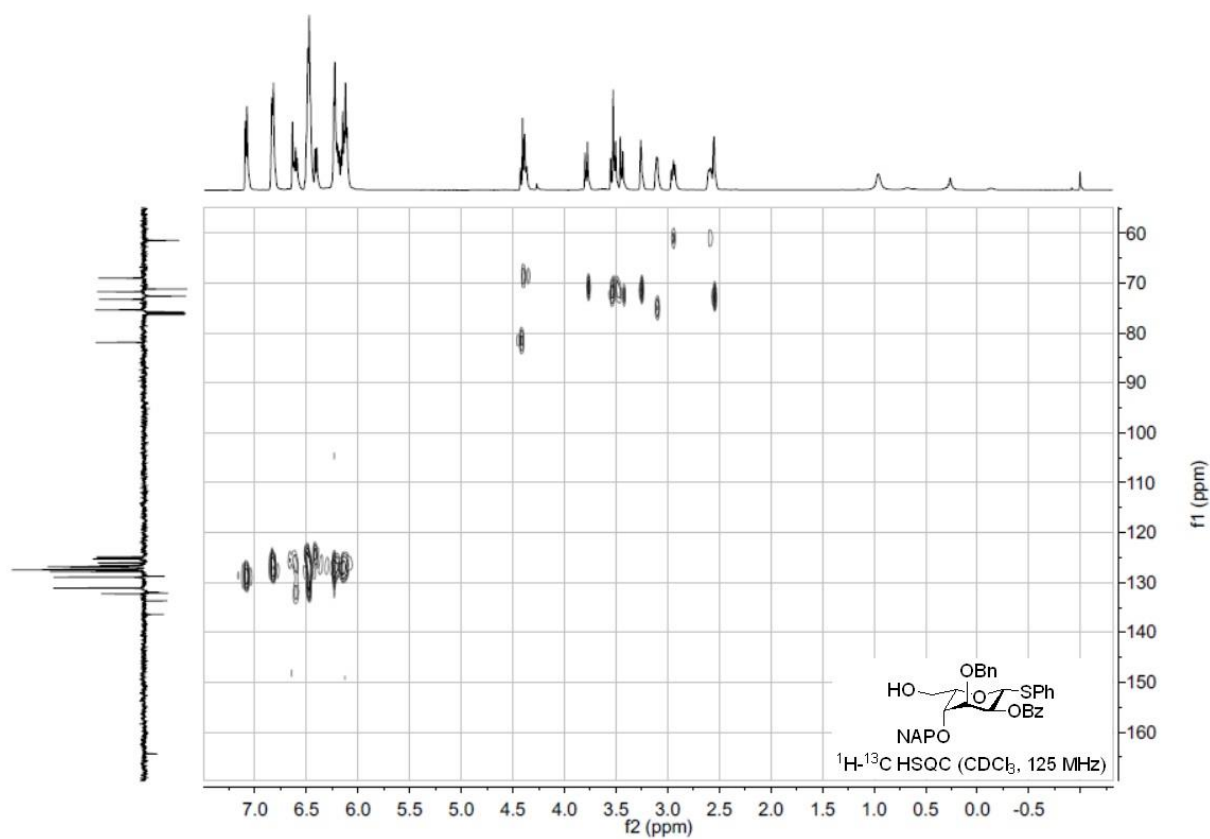

$^1\text{H}$  and  $^{13}\text{C}$  NMR spectra of compound 54

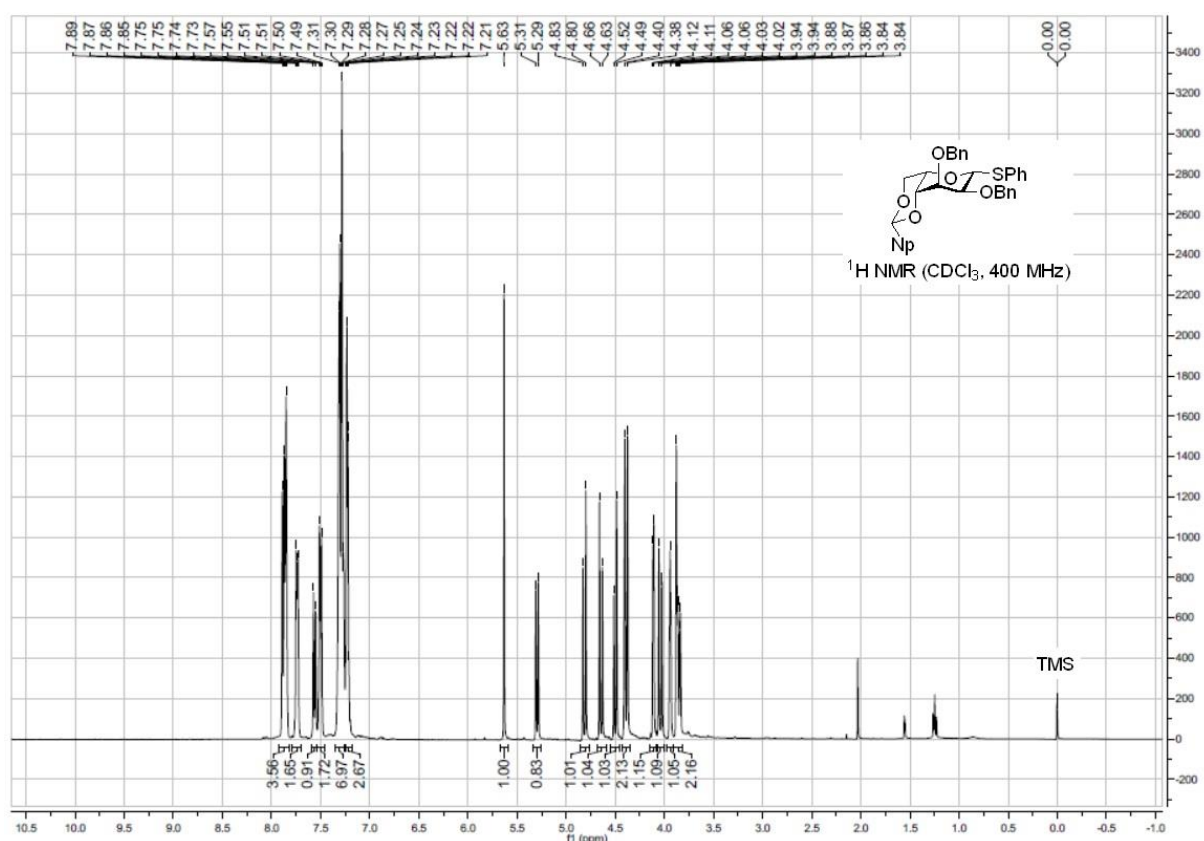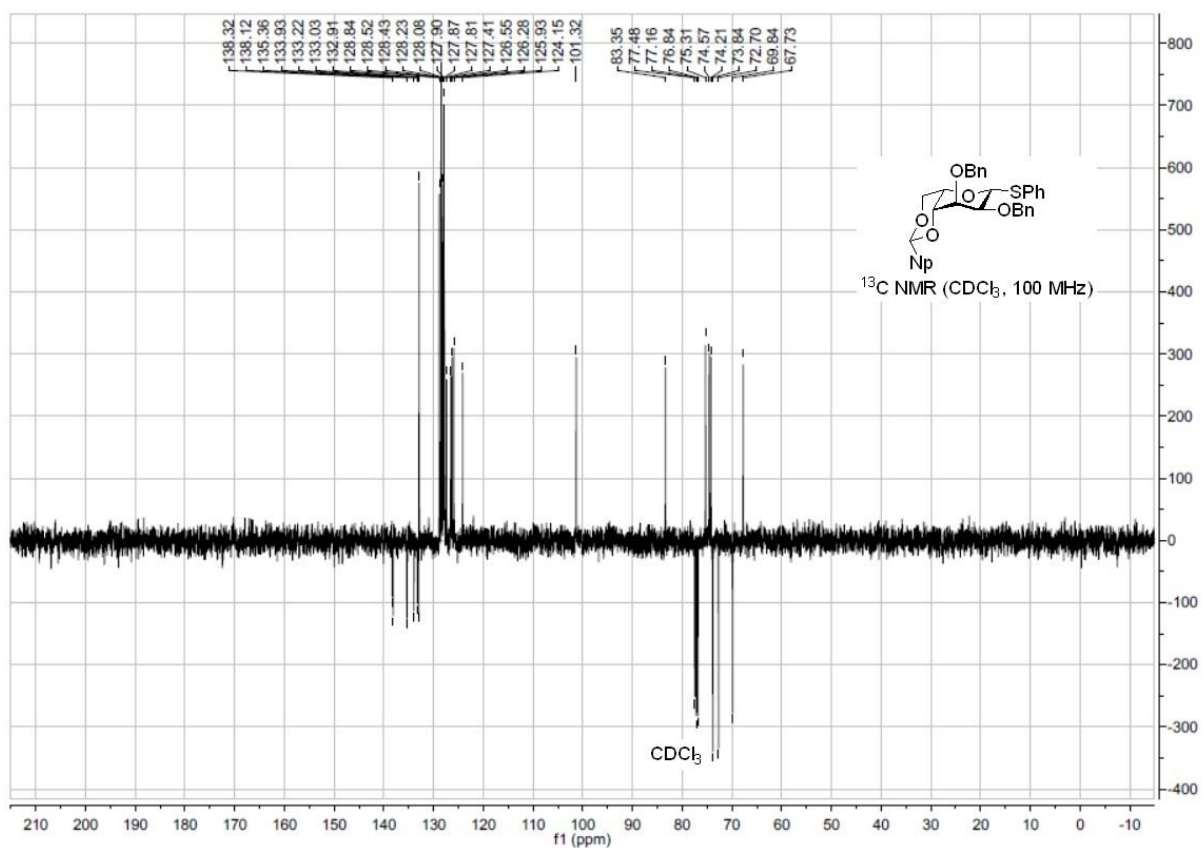



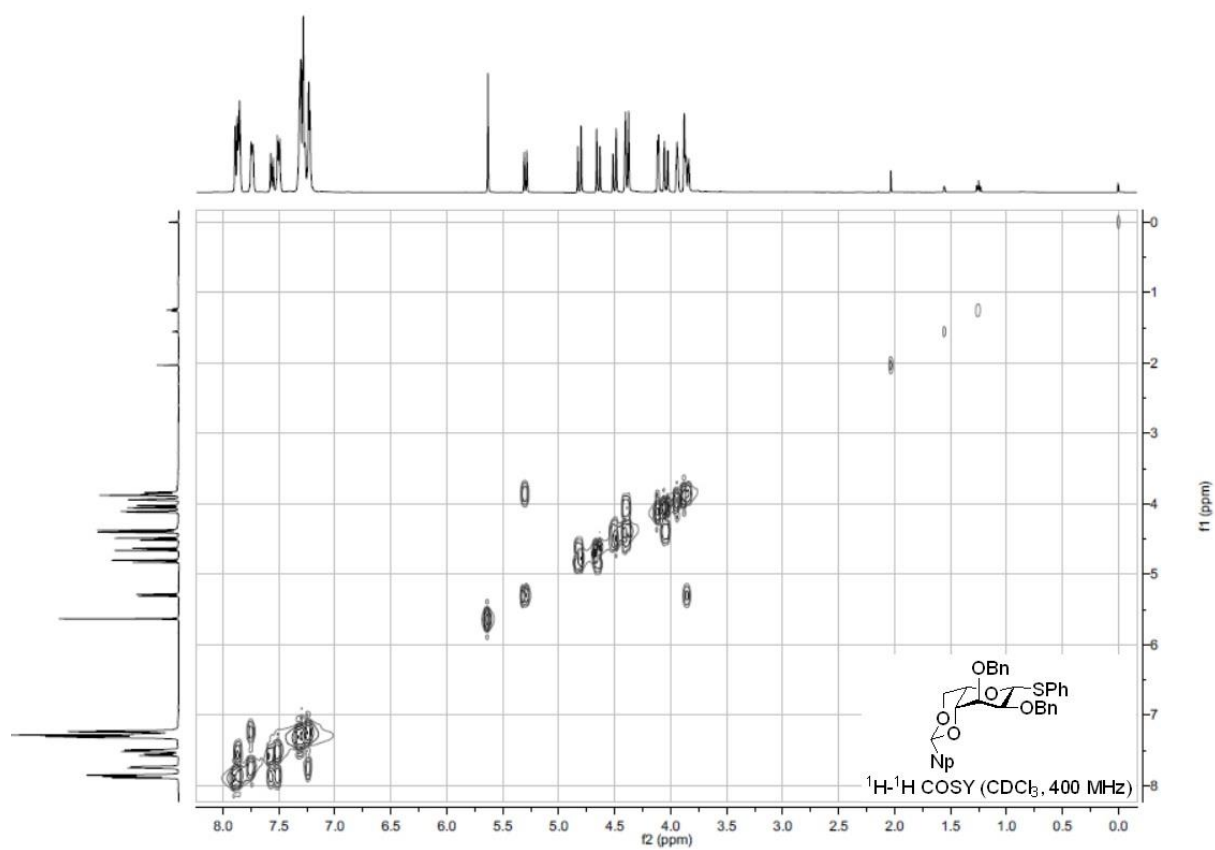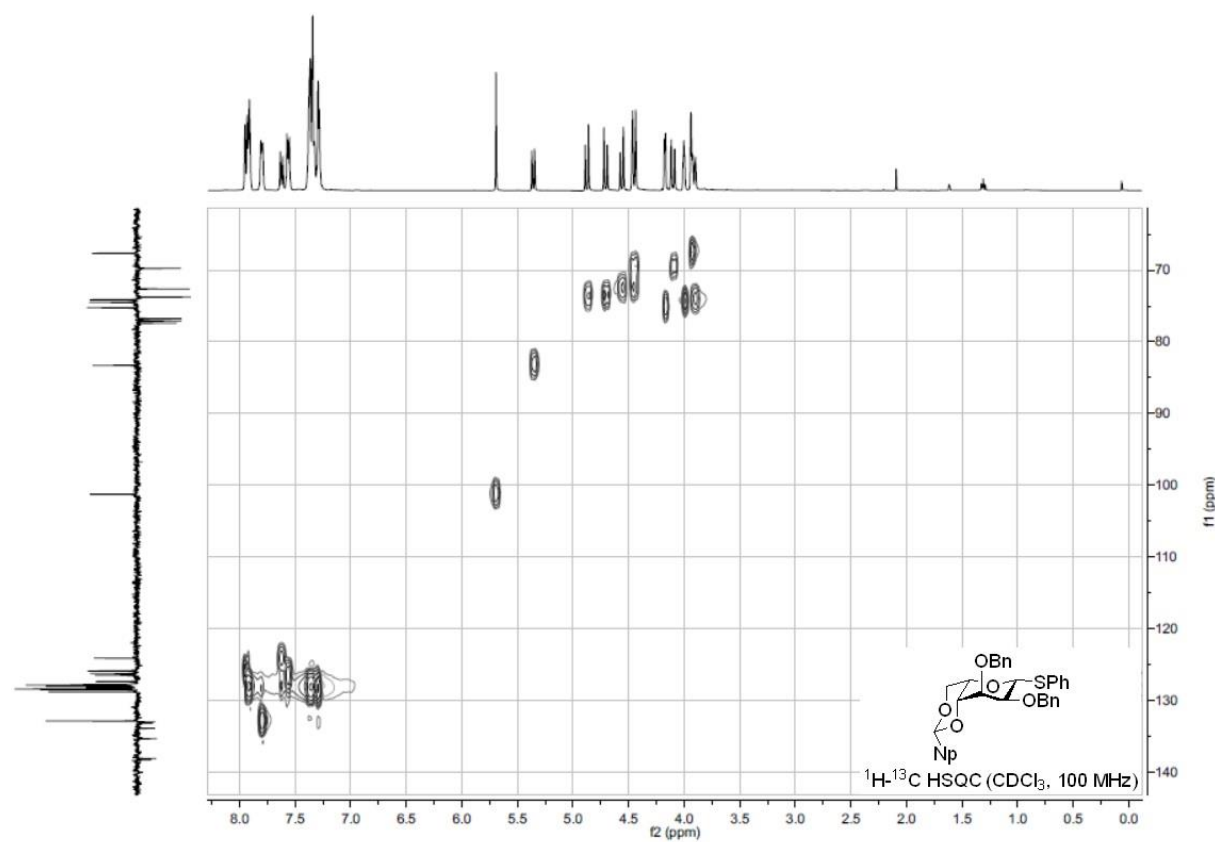

# <sup>1</sup>H and <sup>13</sup>C NMR spectra of compound 55

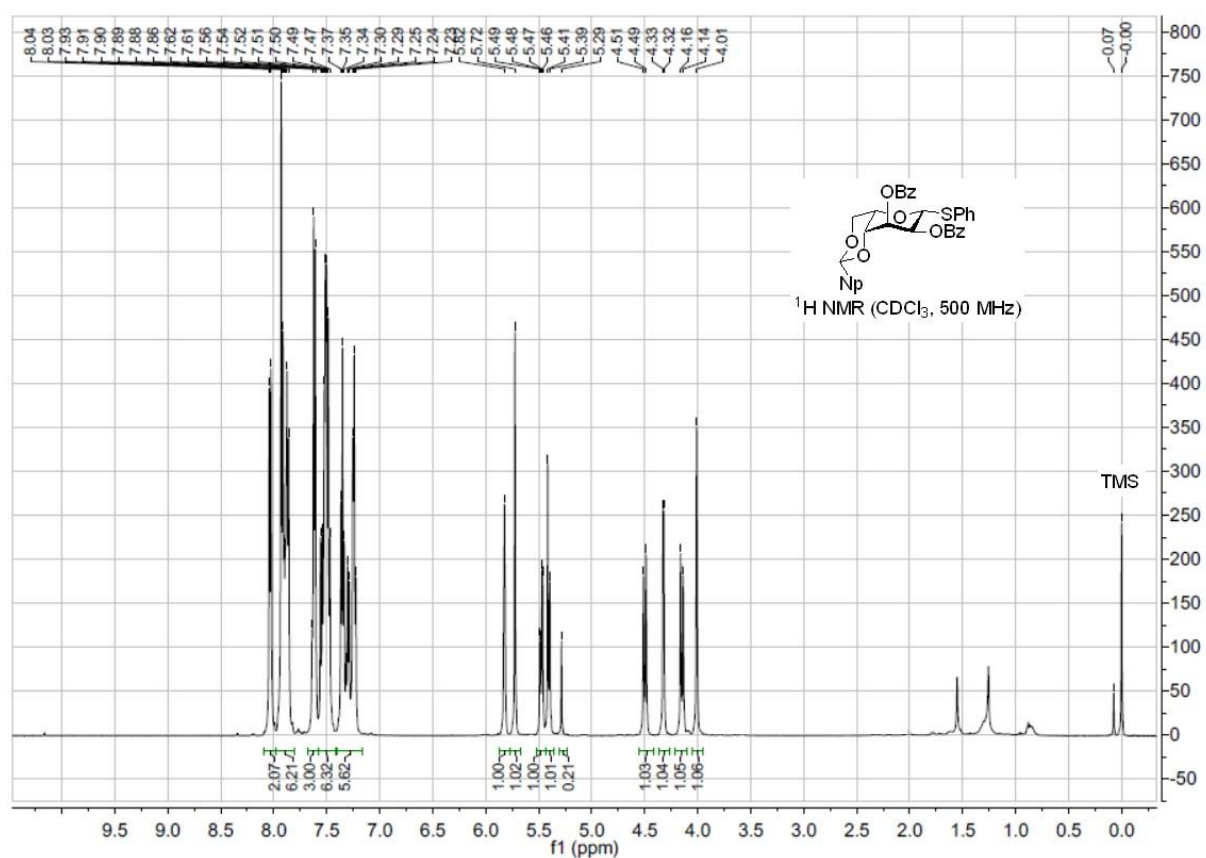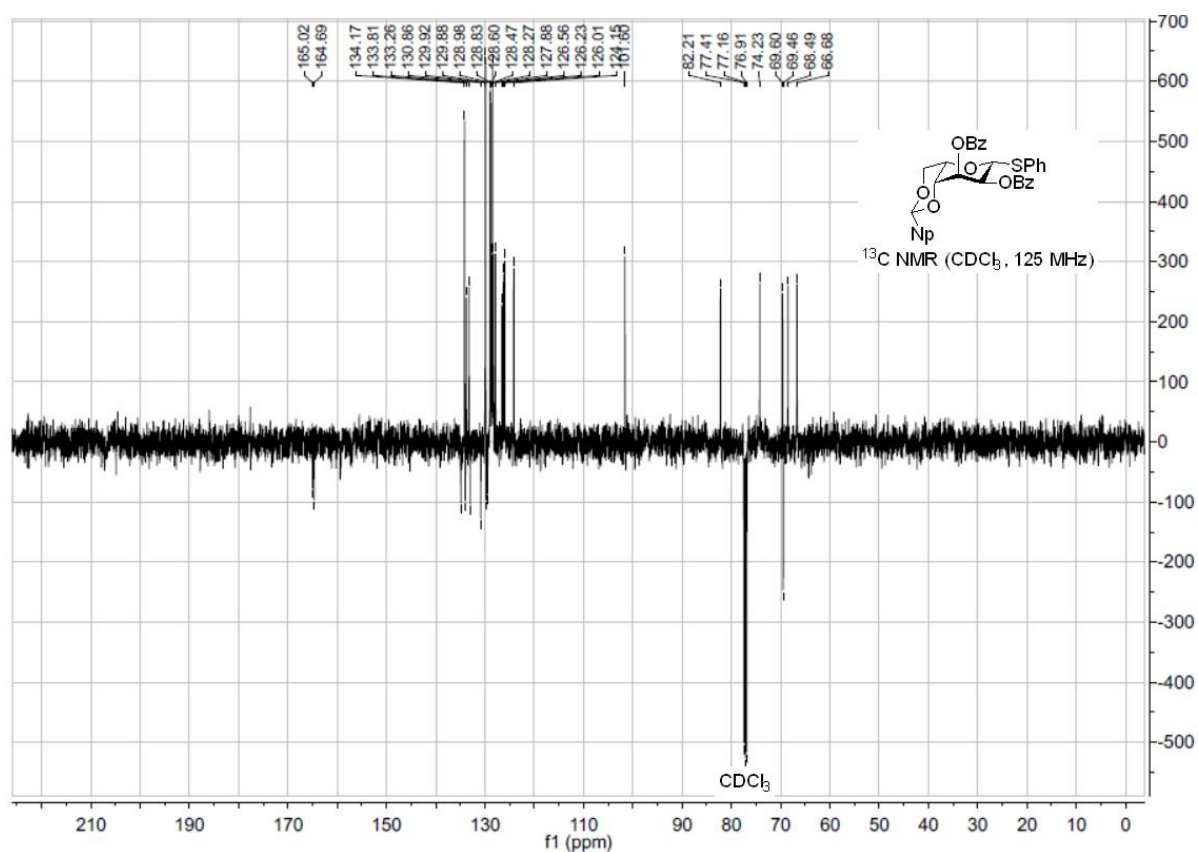

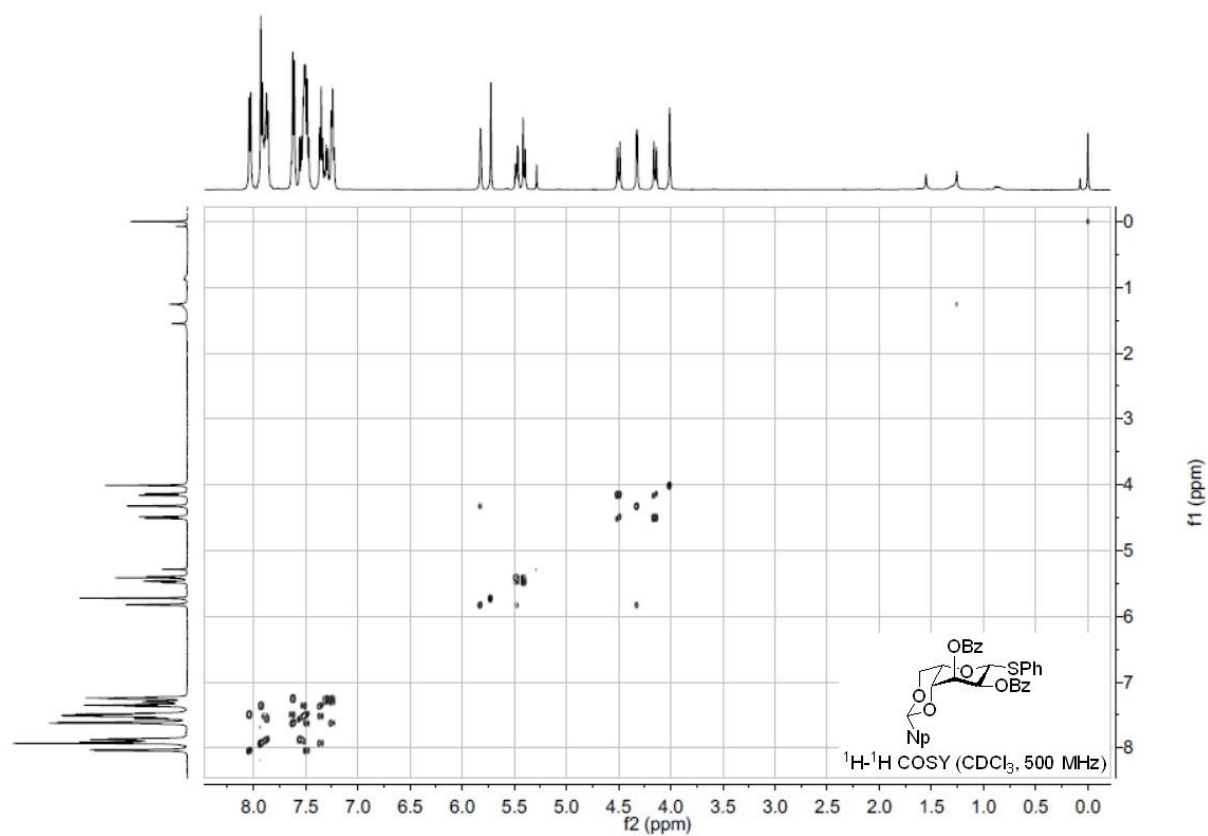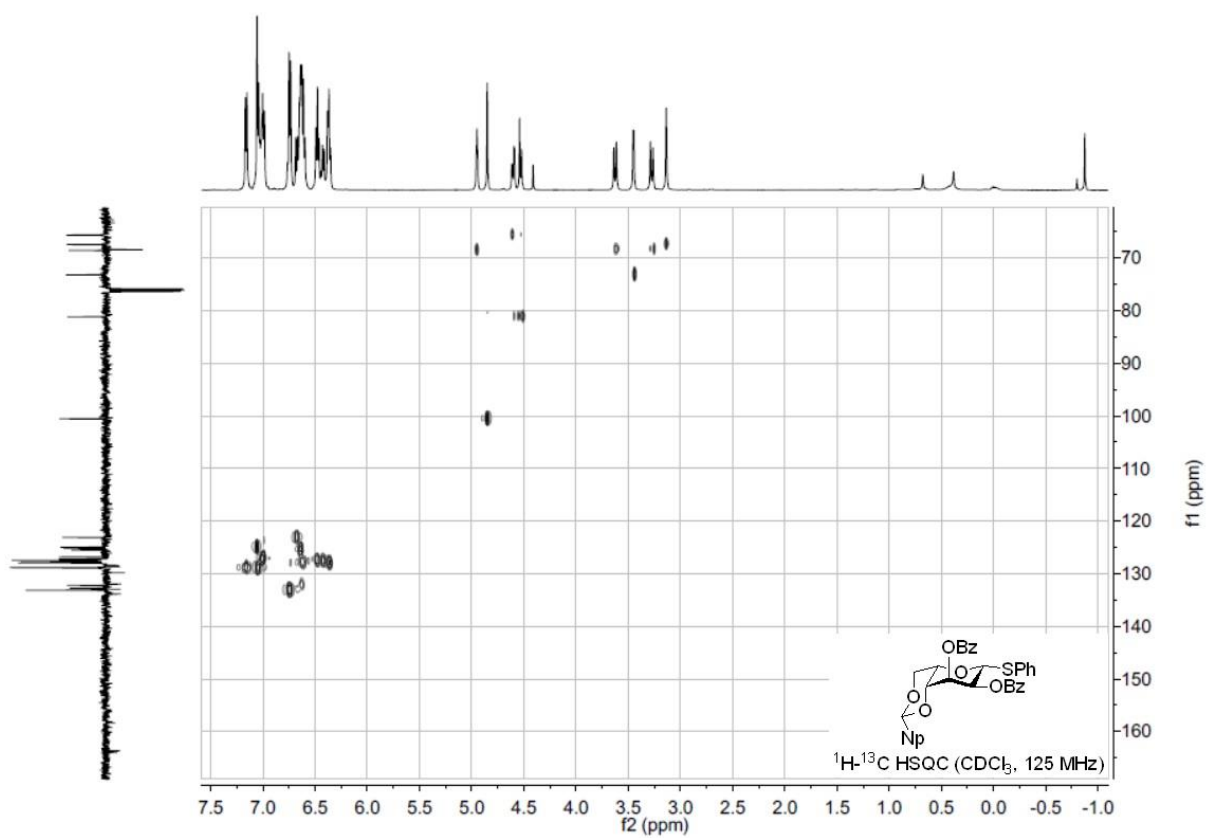

<sup>1</sup>H and <sup>13</sup>C NMR spectra of compound **56**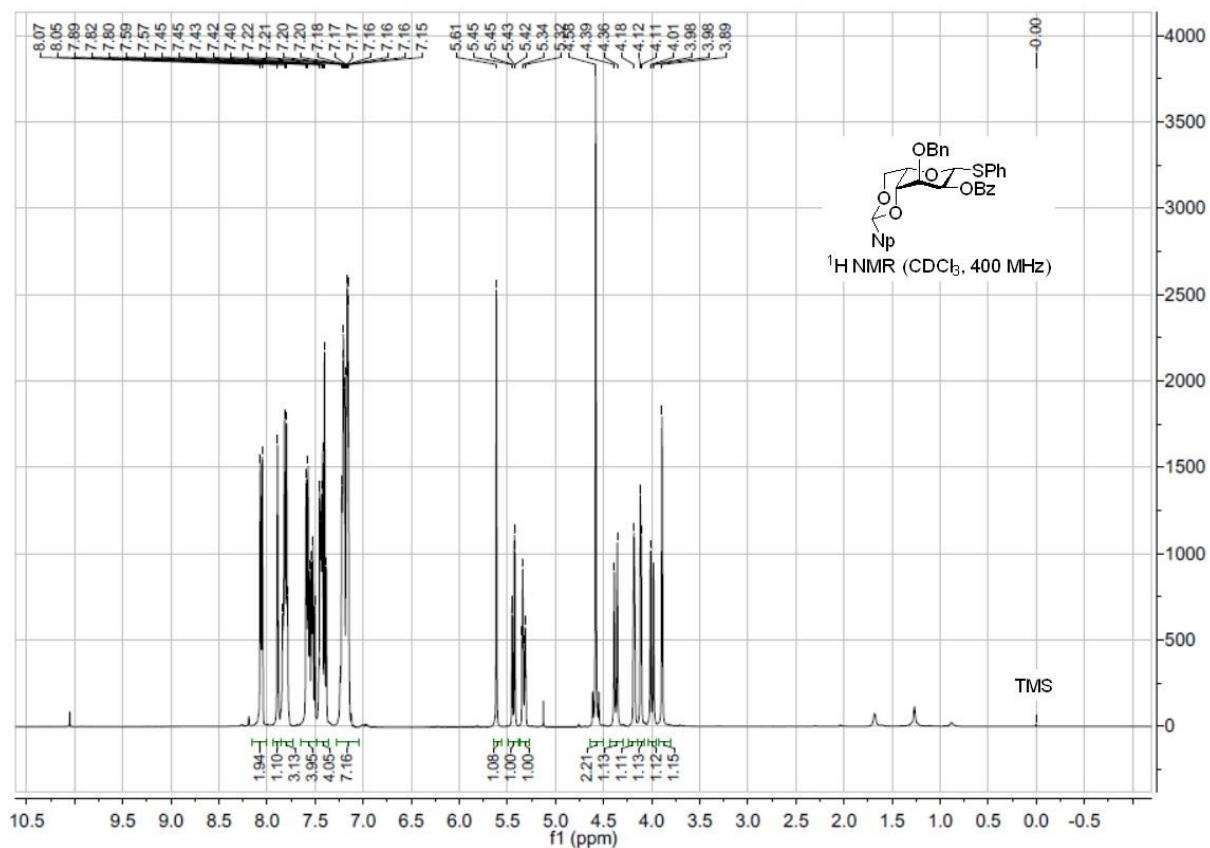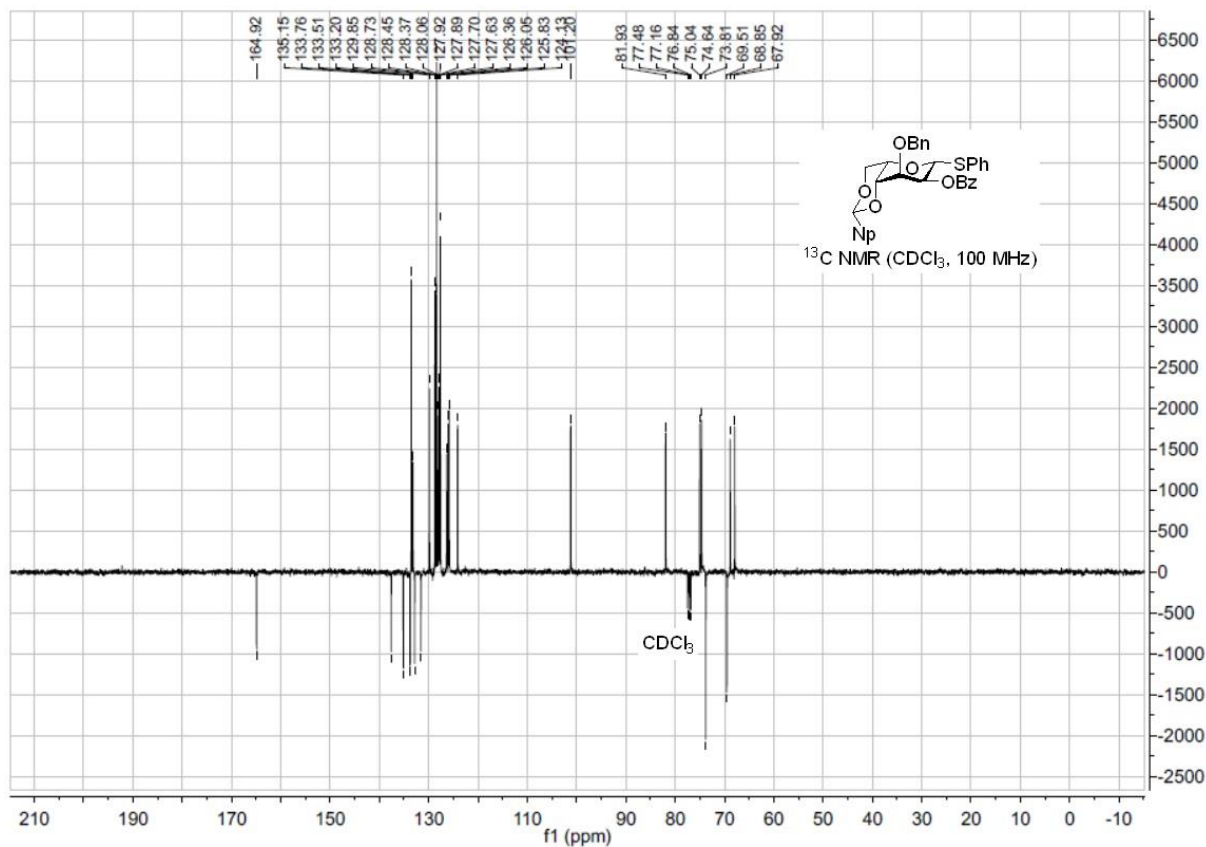

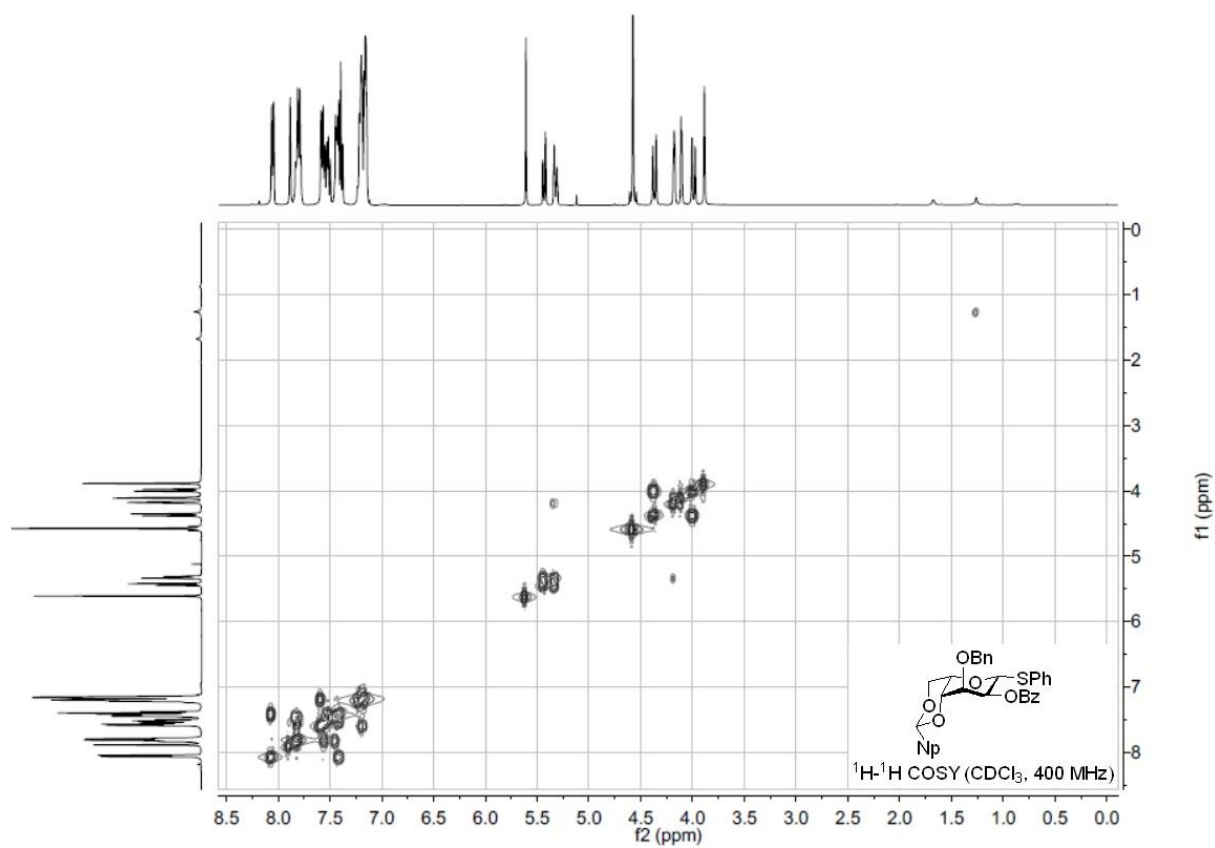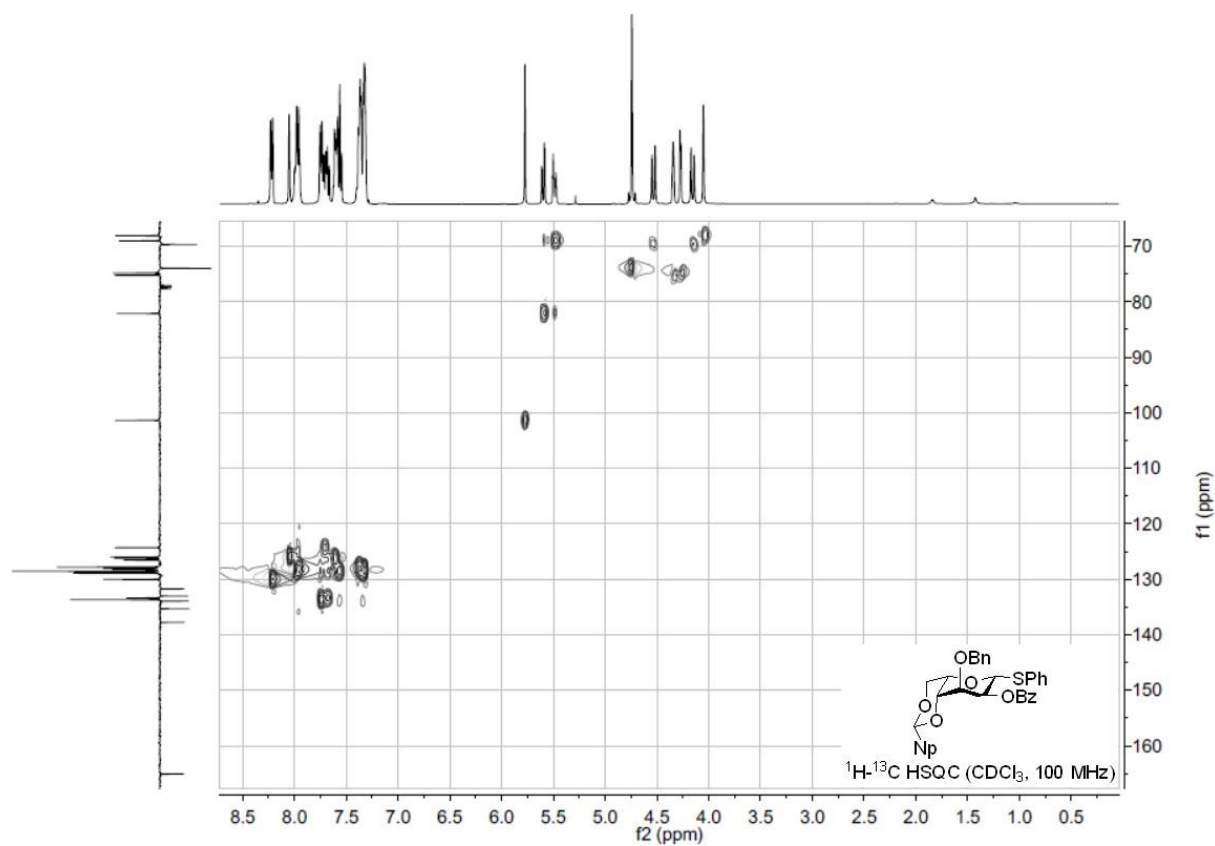

$^1\text{H}$  and  $^{13}\text{C}$  NMR spectra of compound 57

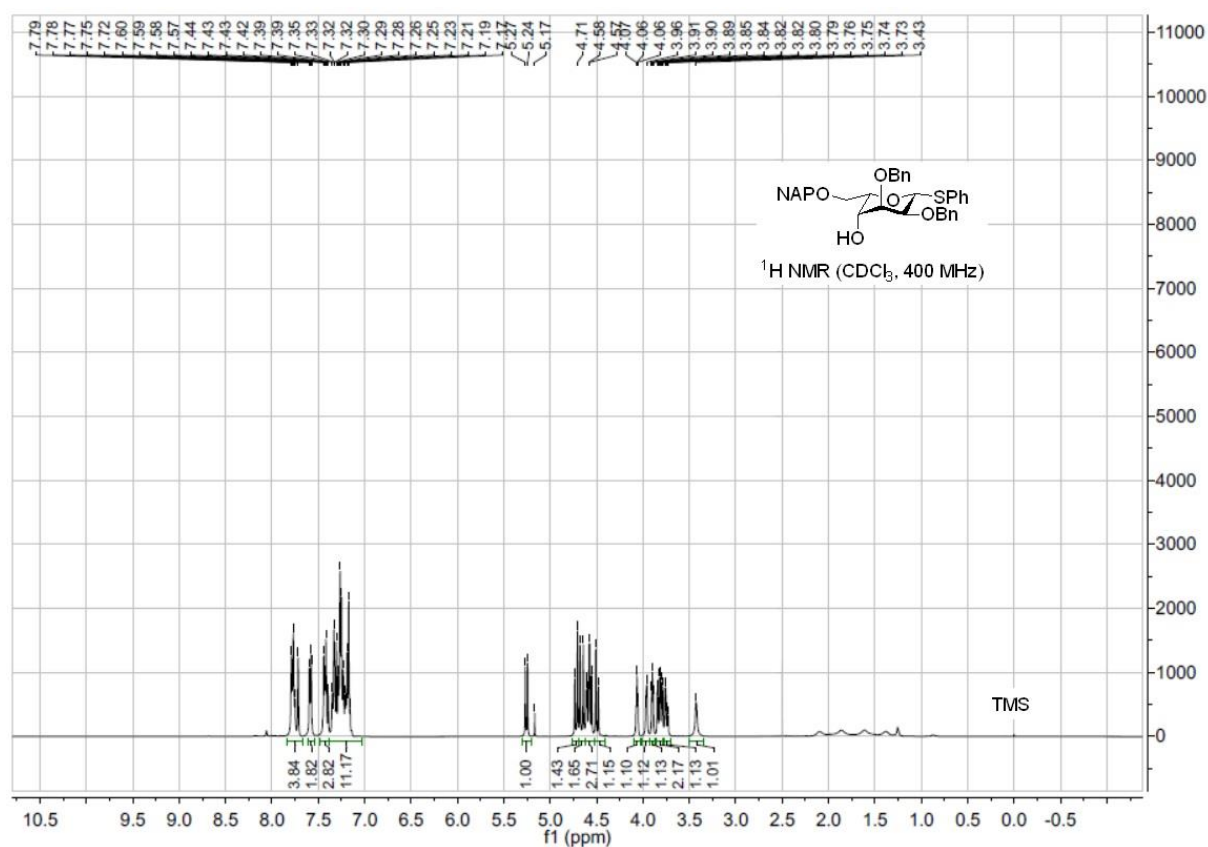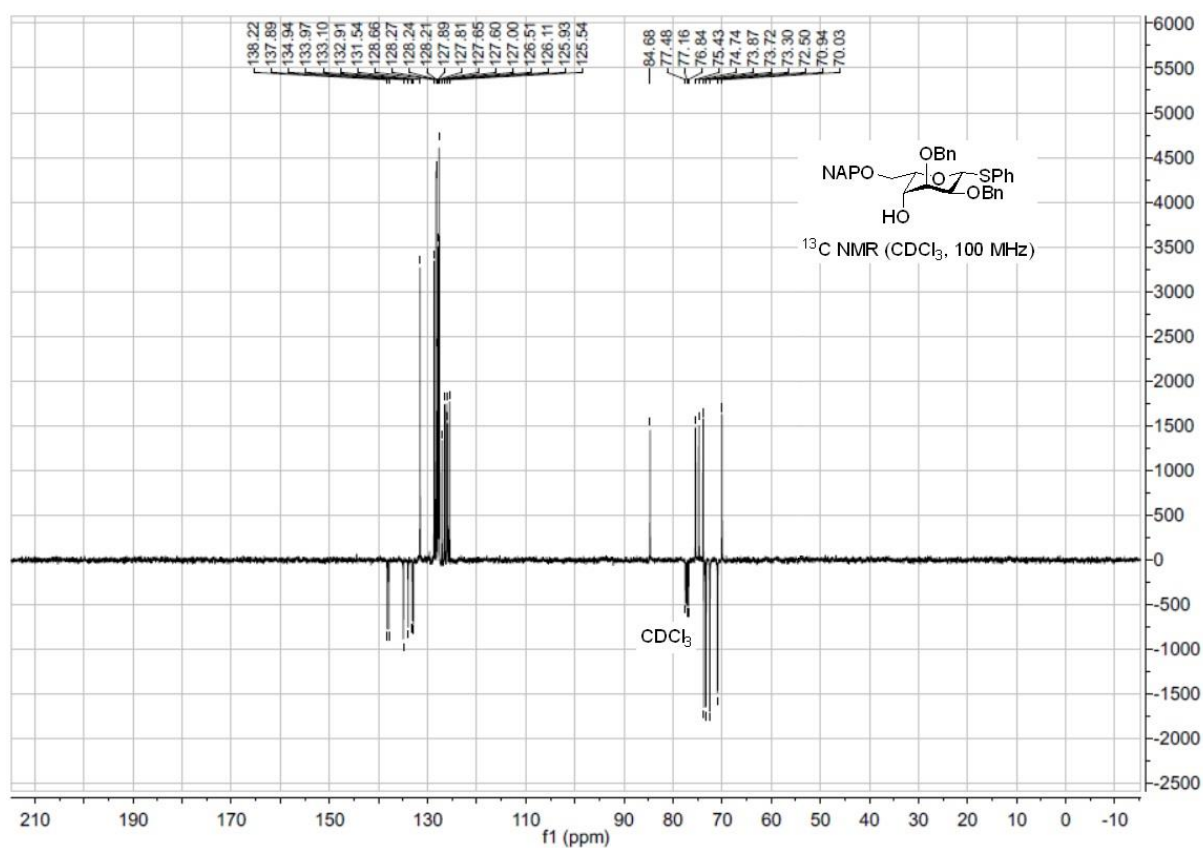

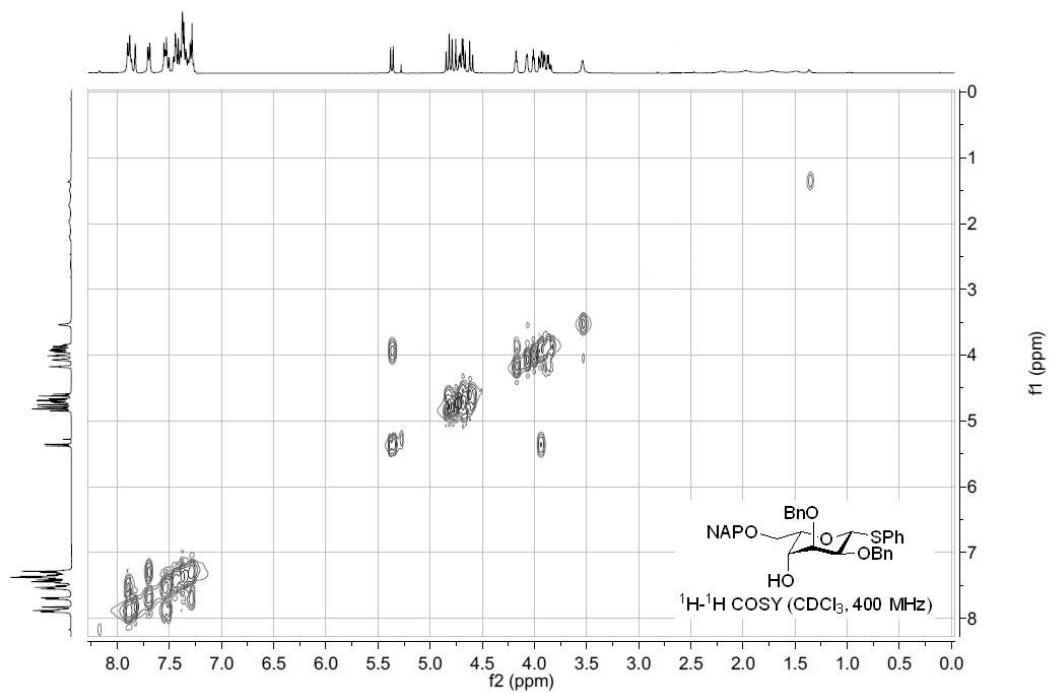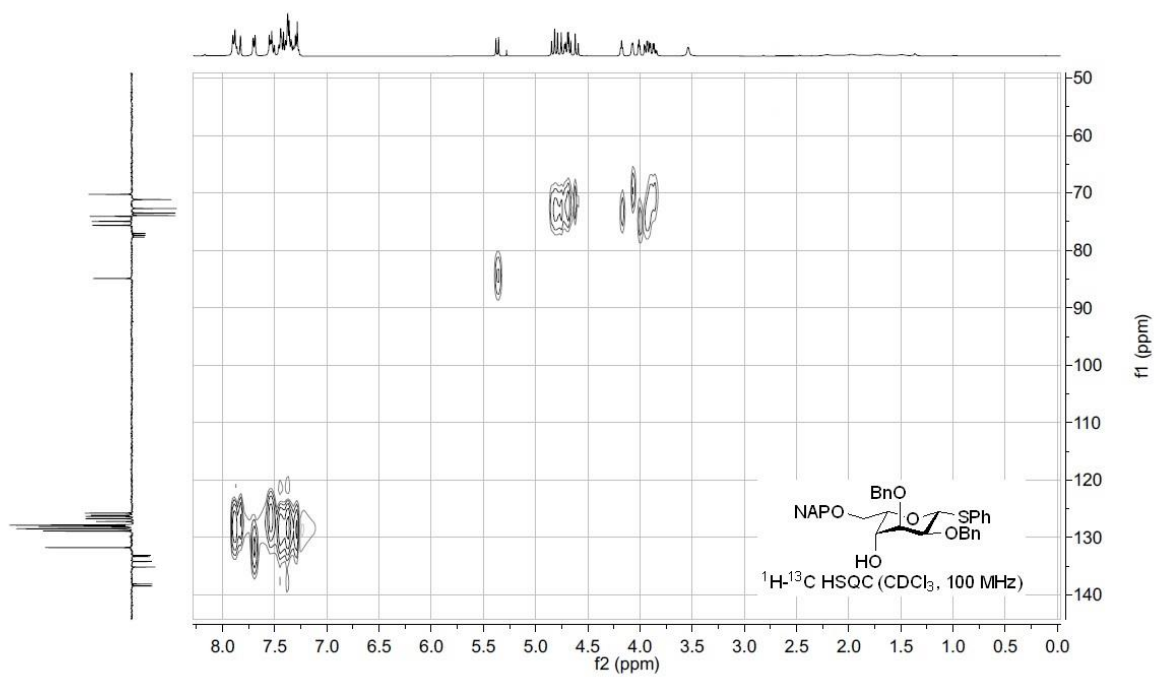



$^1\text{H}$  and  $^{13}\text{C}$  NMR spectra of compound 58

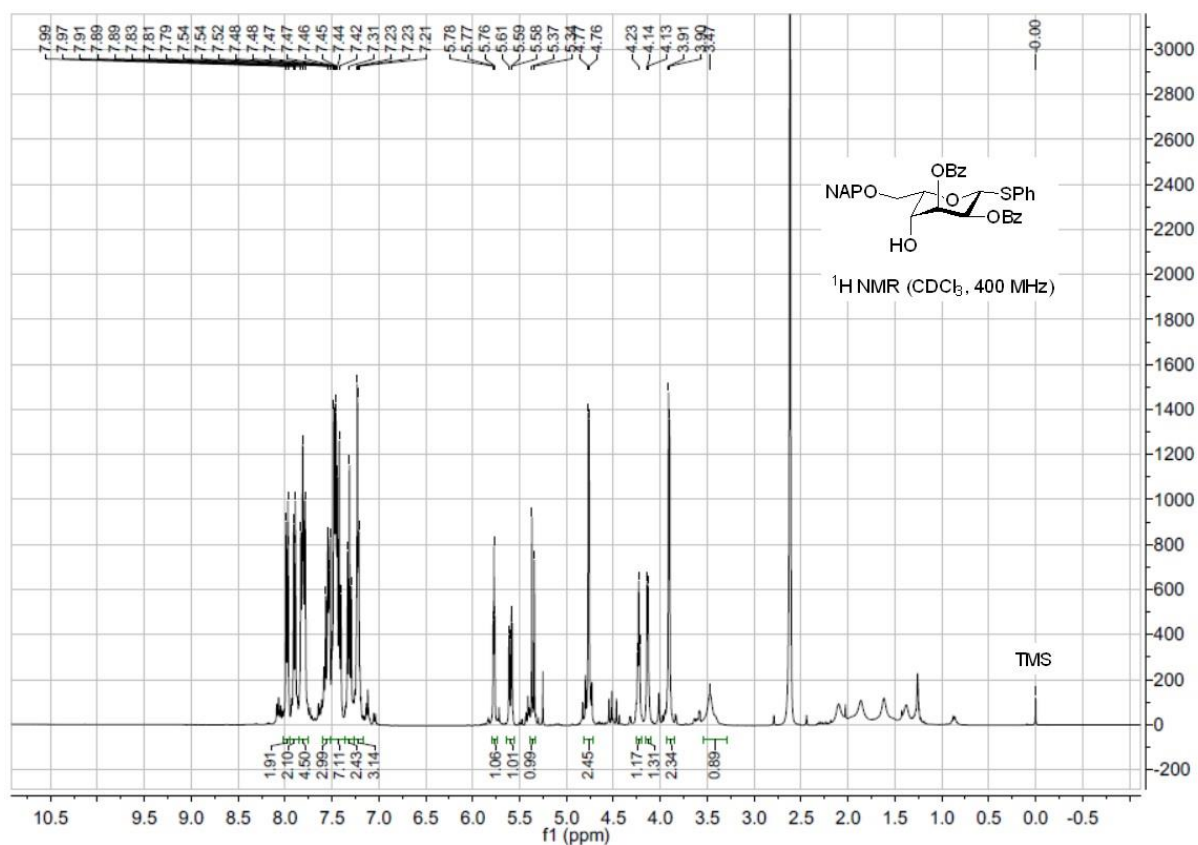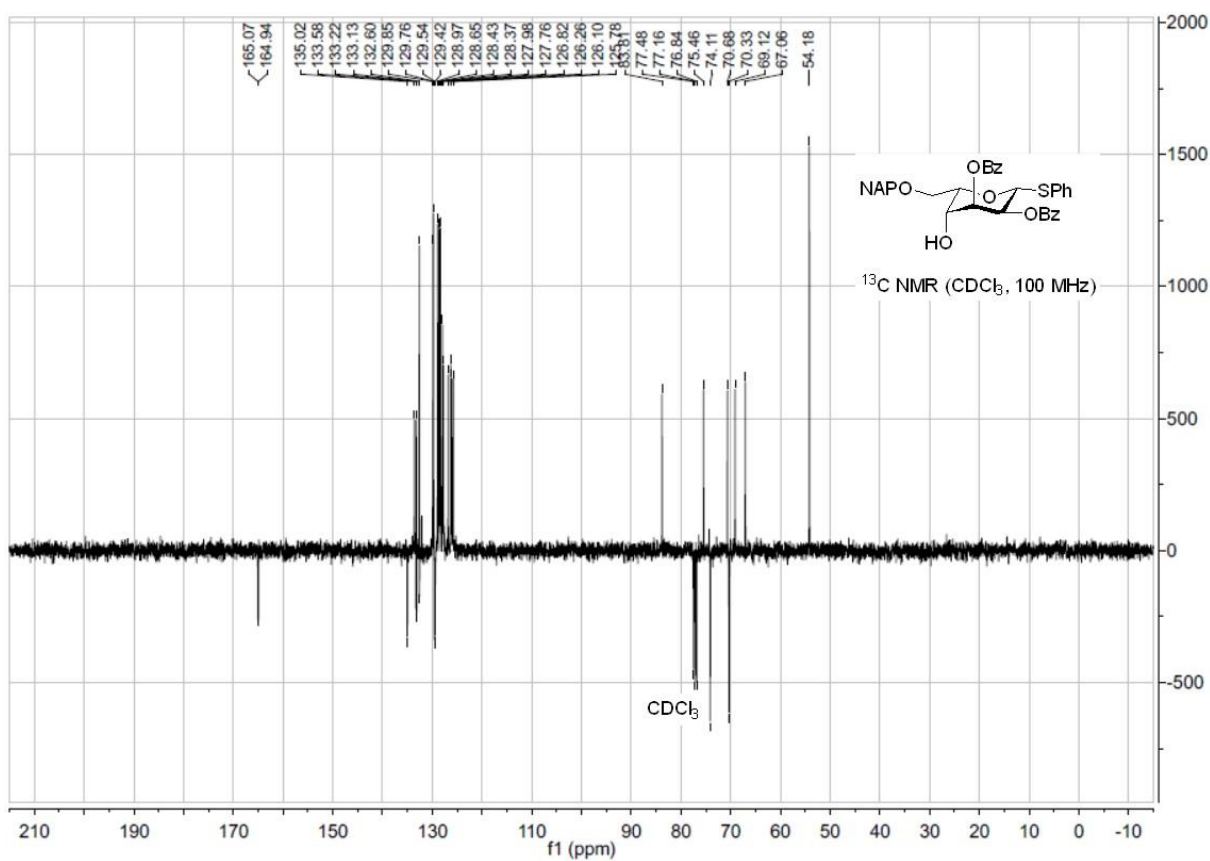

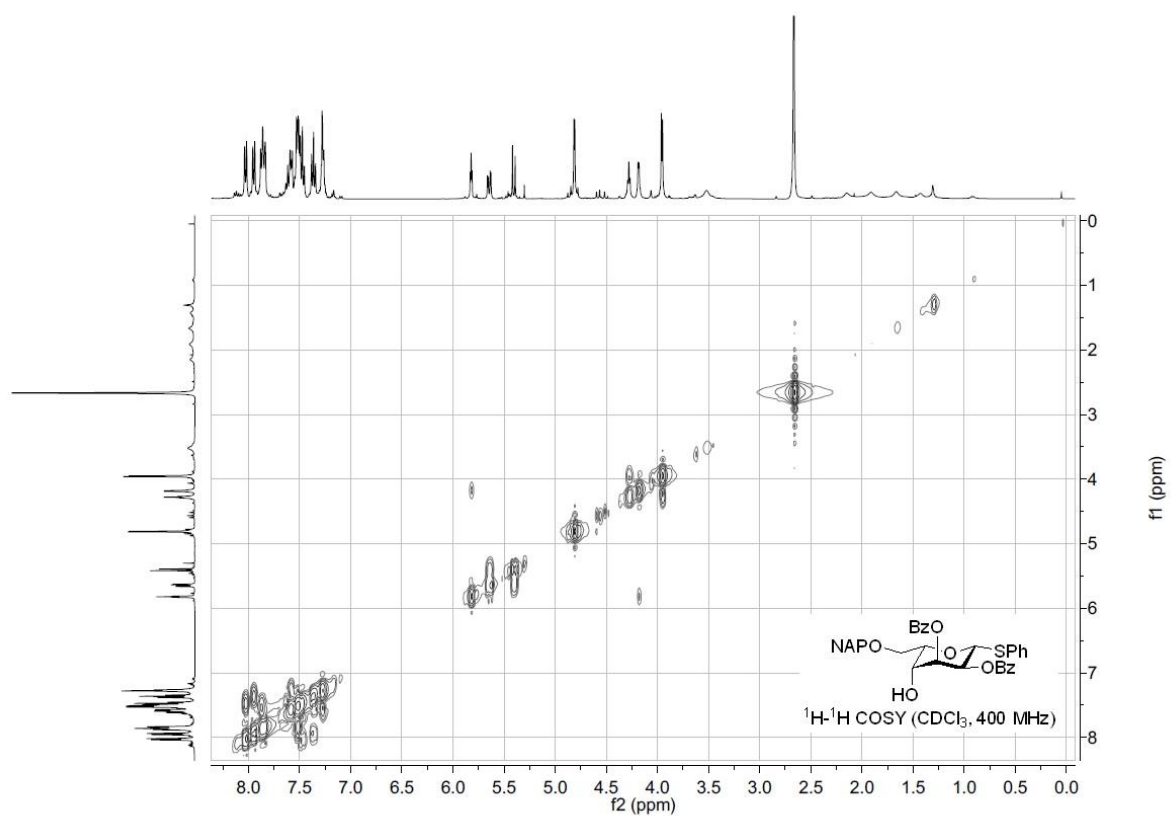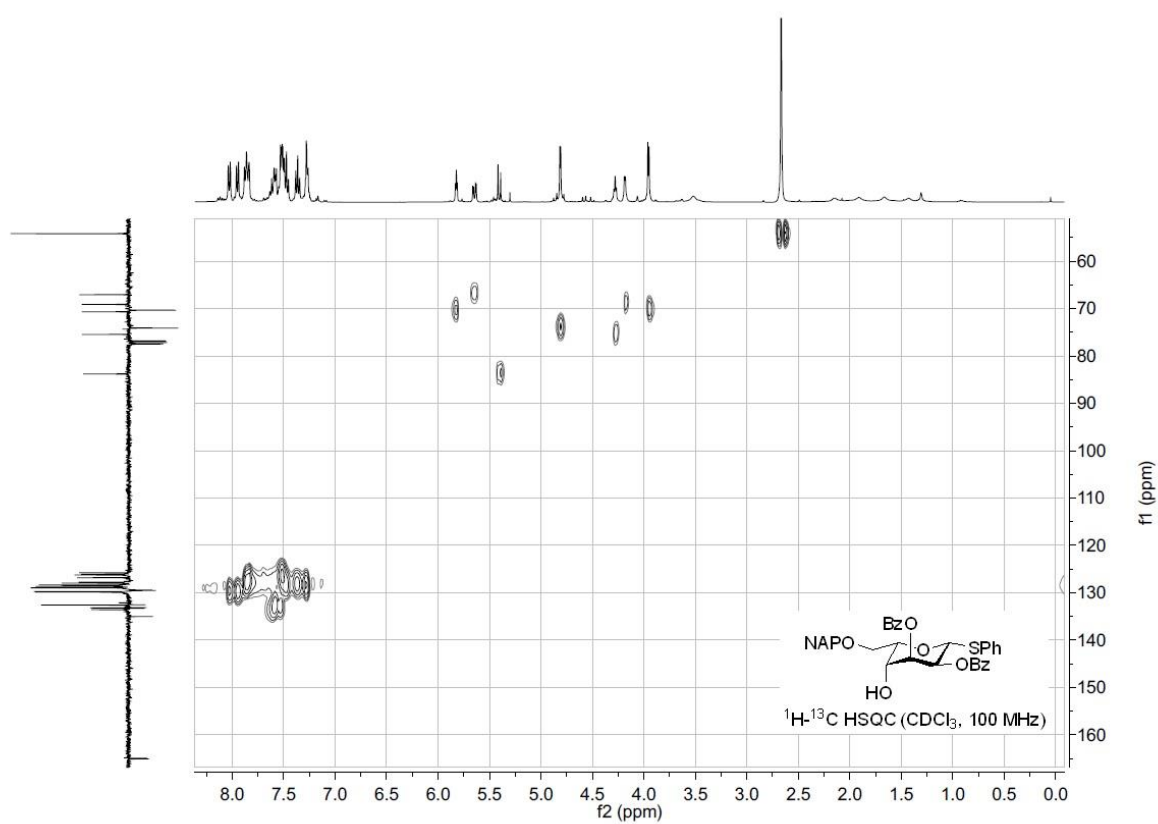

$^1\text{H}$  and  $^{13}\text{C}$  NMR spectra of compound **59**

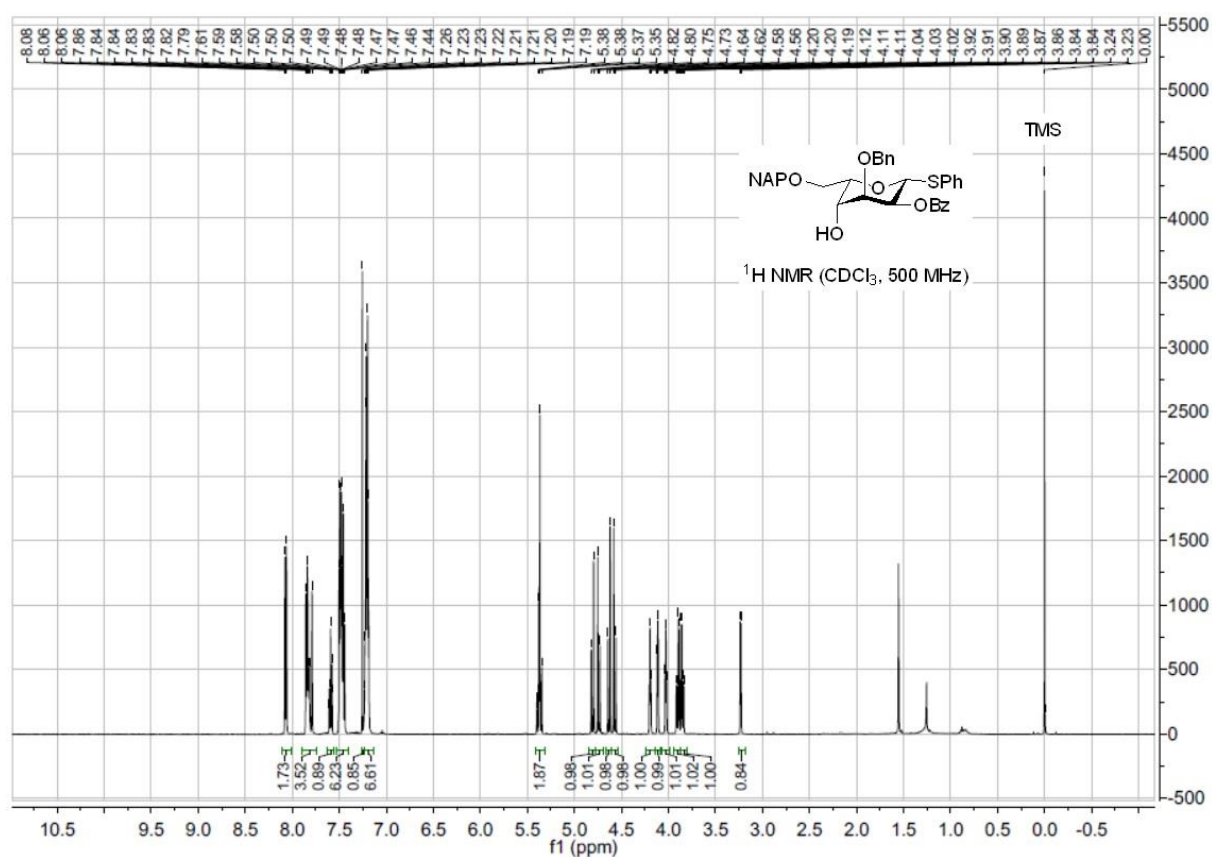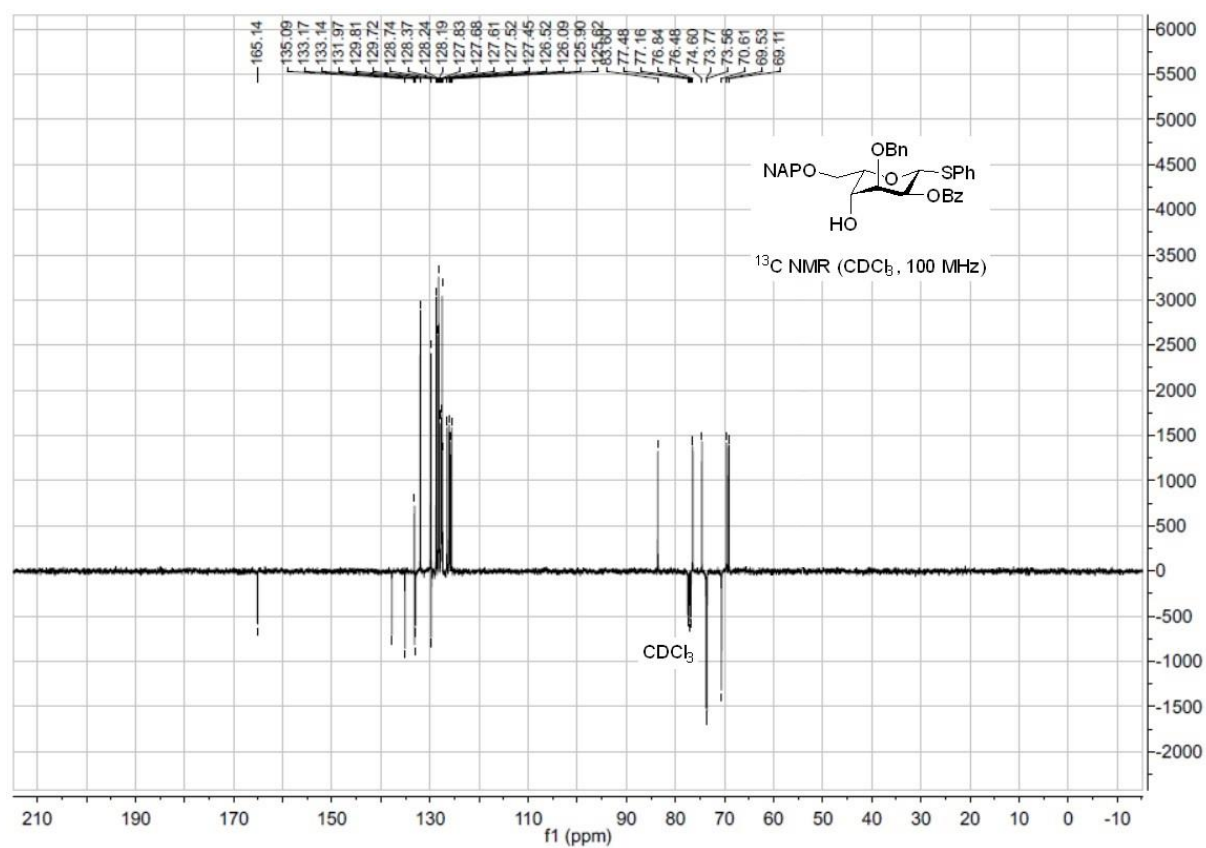

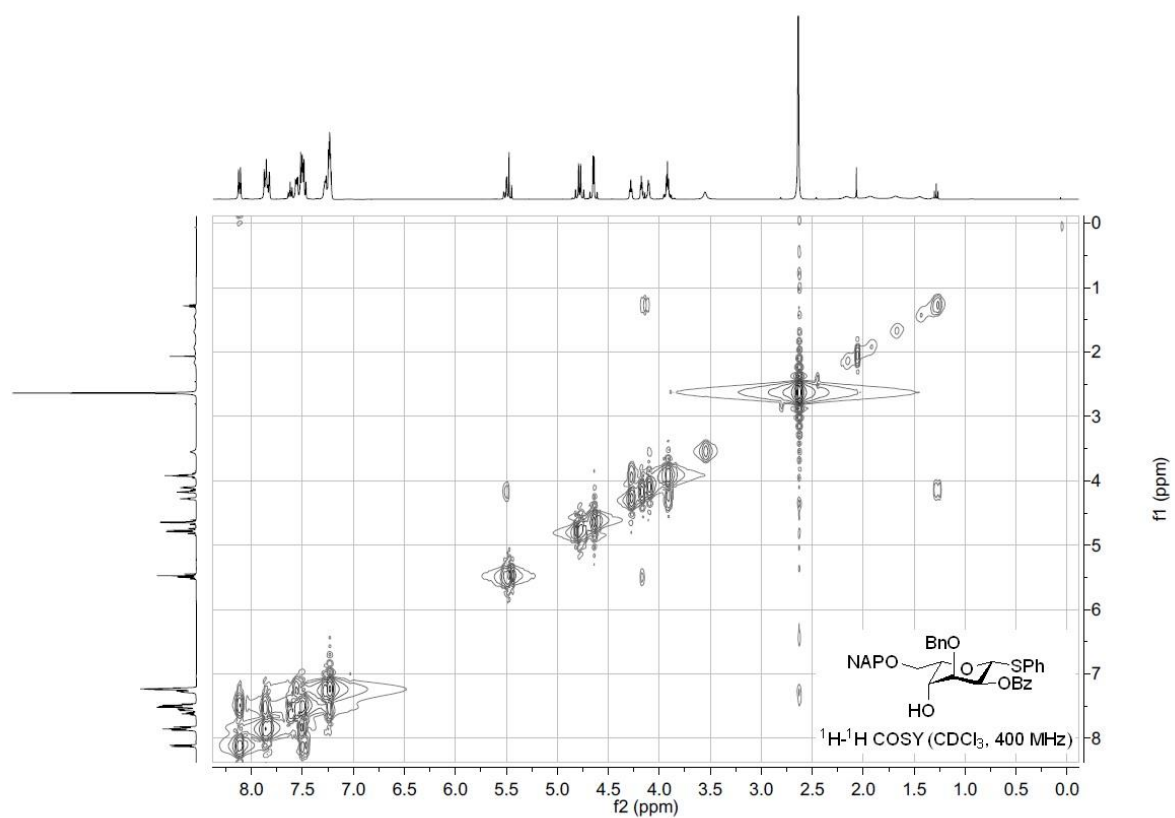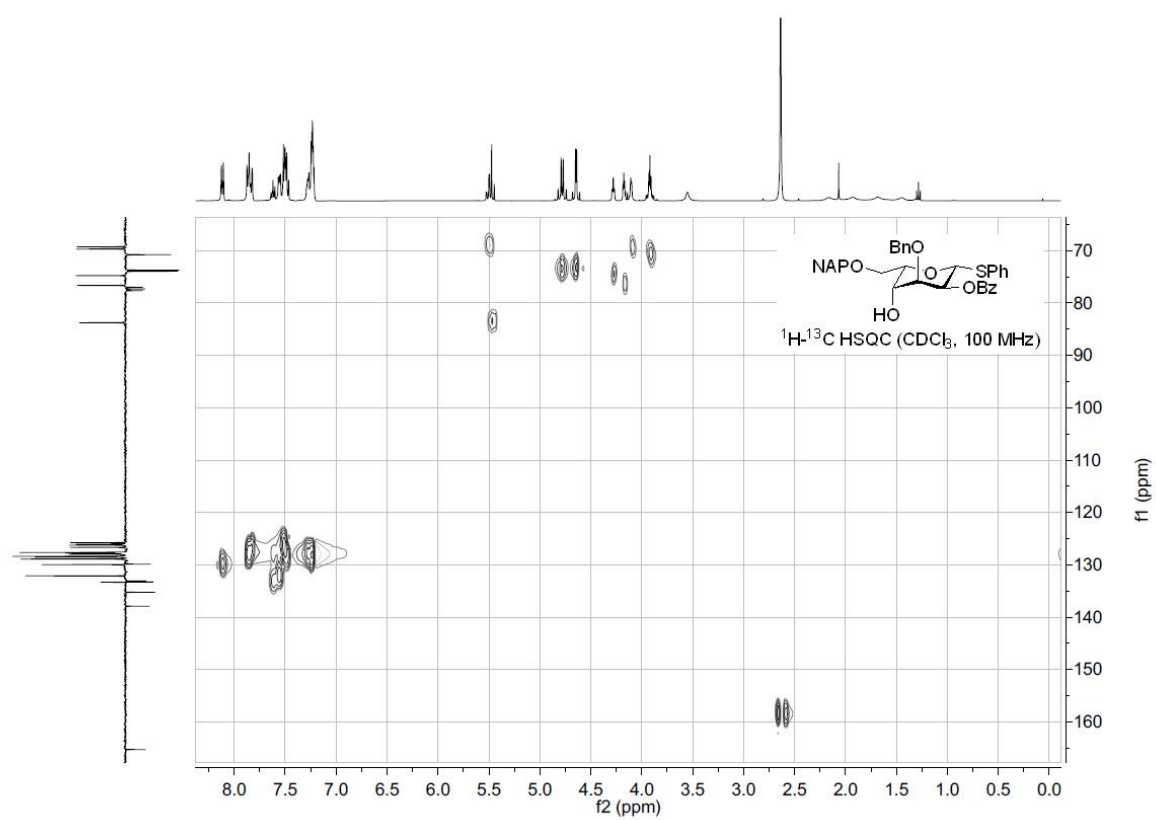

$^1\text{H}$  and  $^{13}\text{C}$  NMR spectra of compound **60**

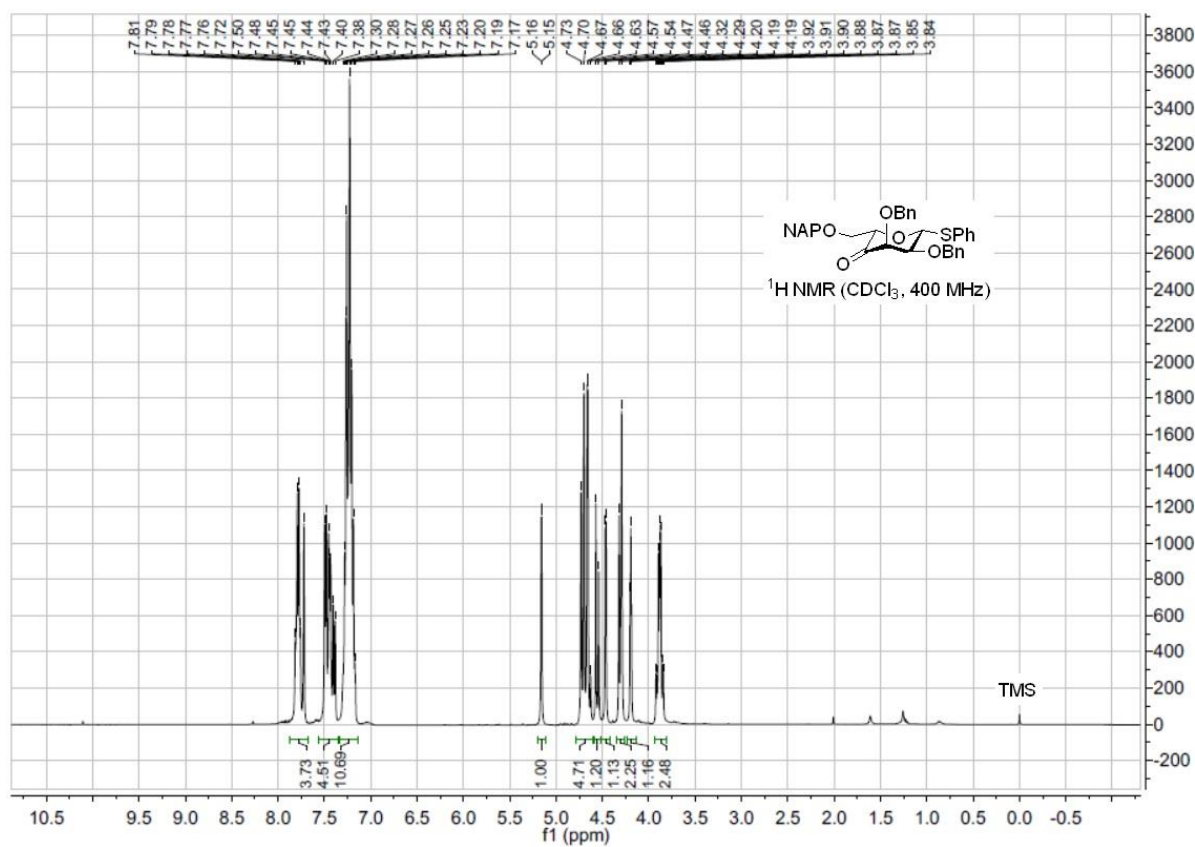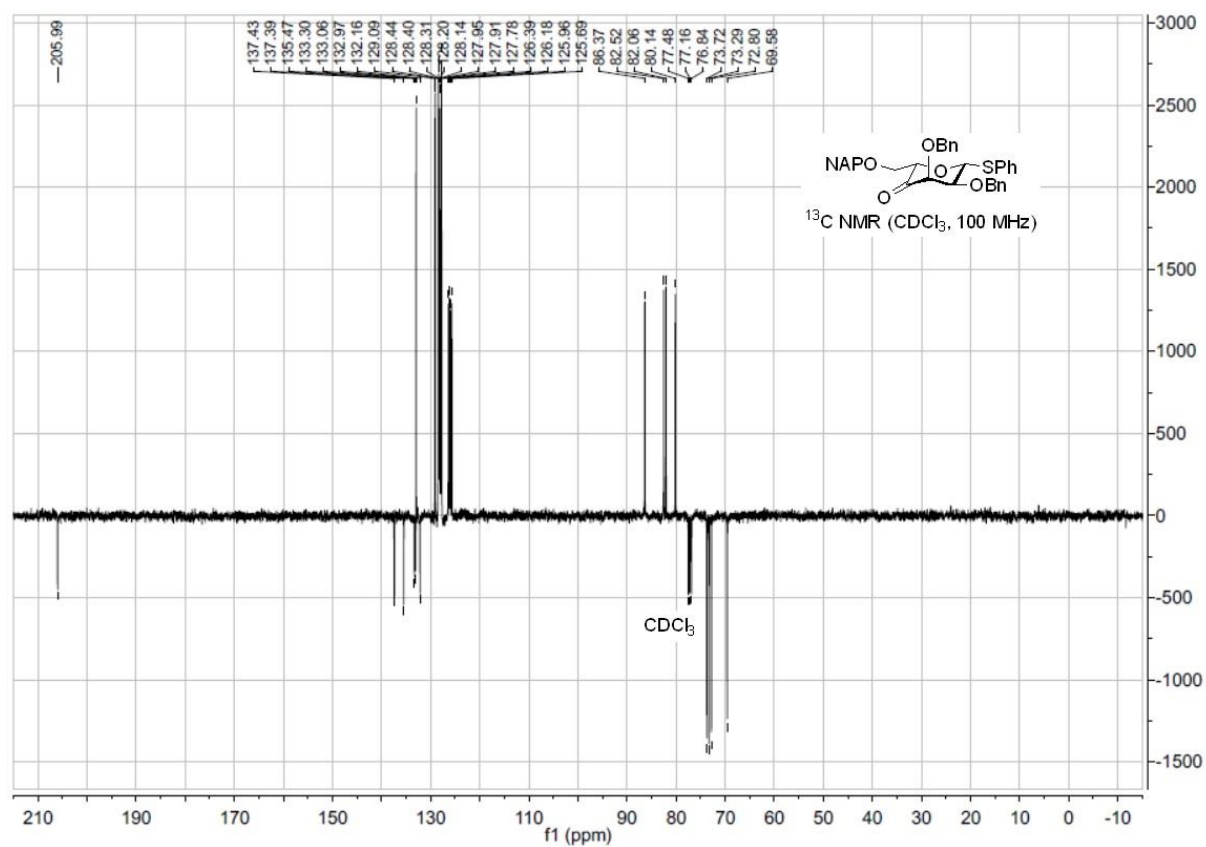

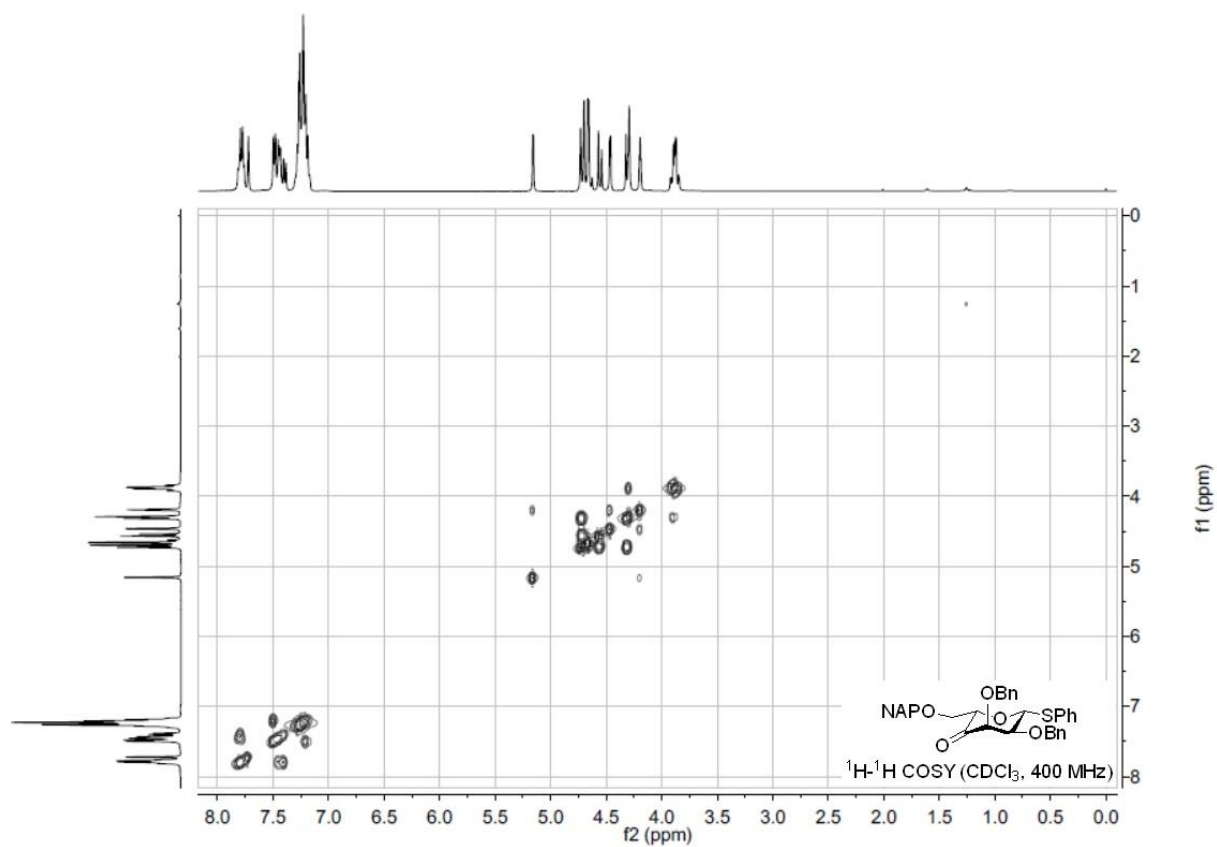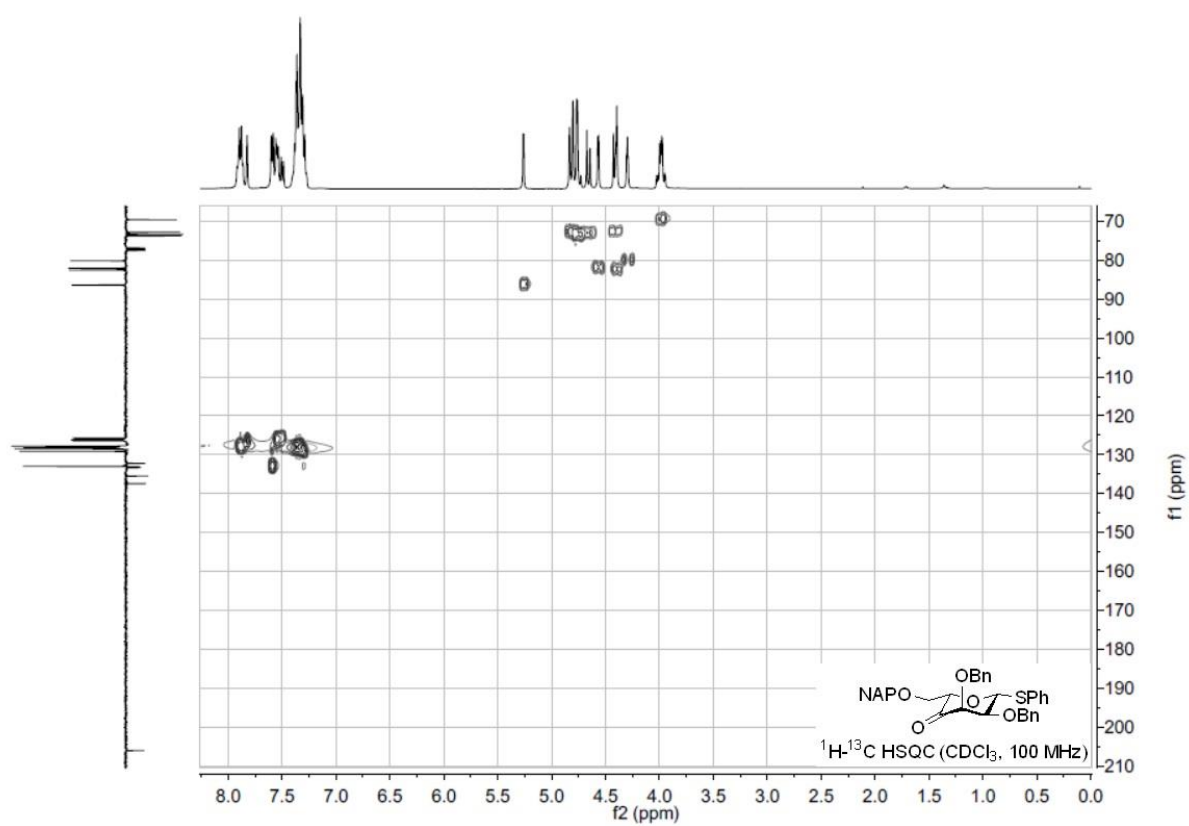

<sup>1</sup>H and <sup>13</sup>C NMR spectra of compound **61**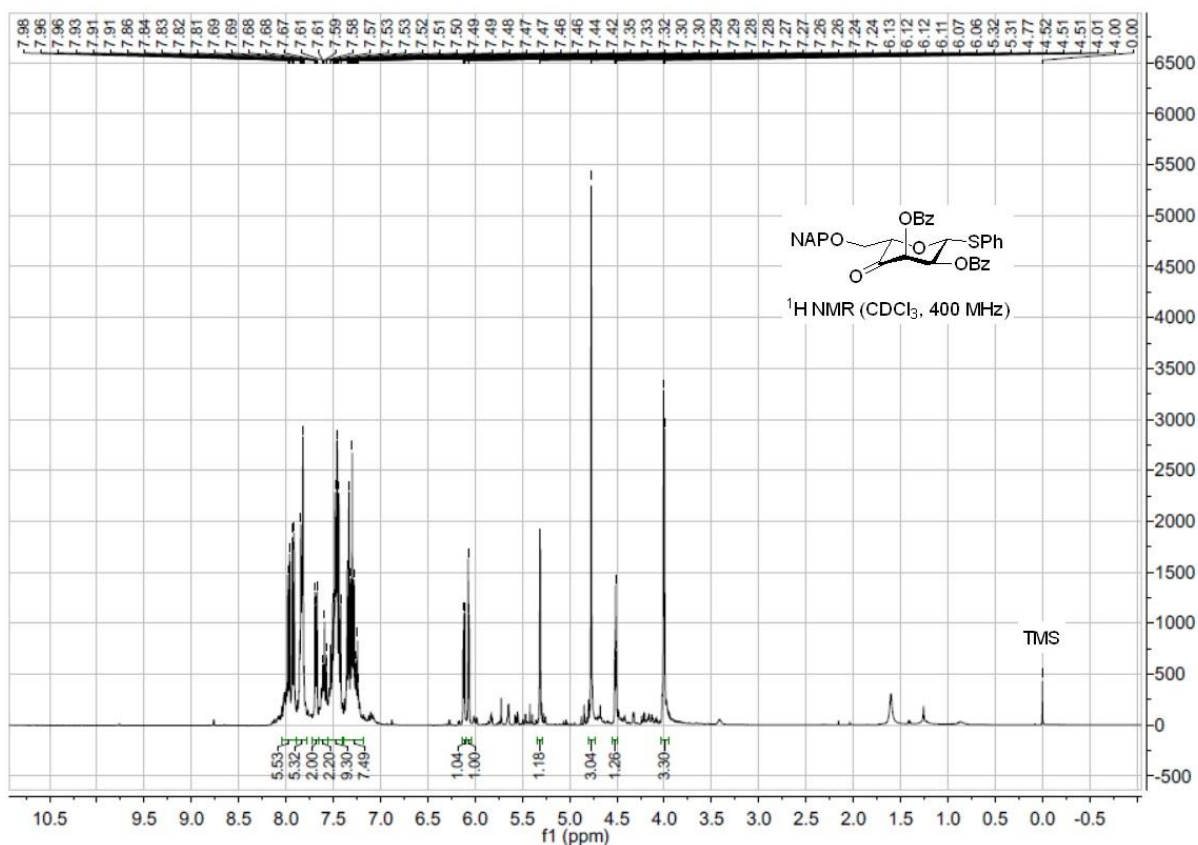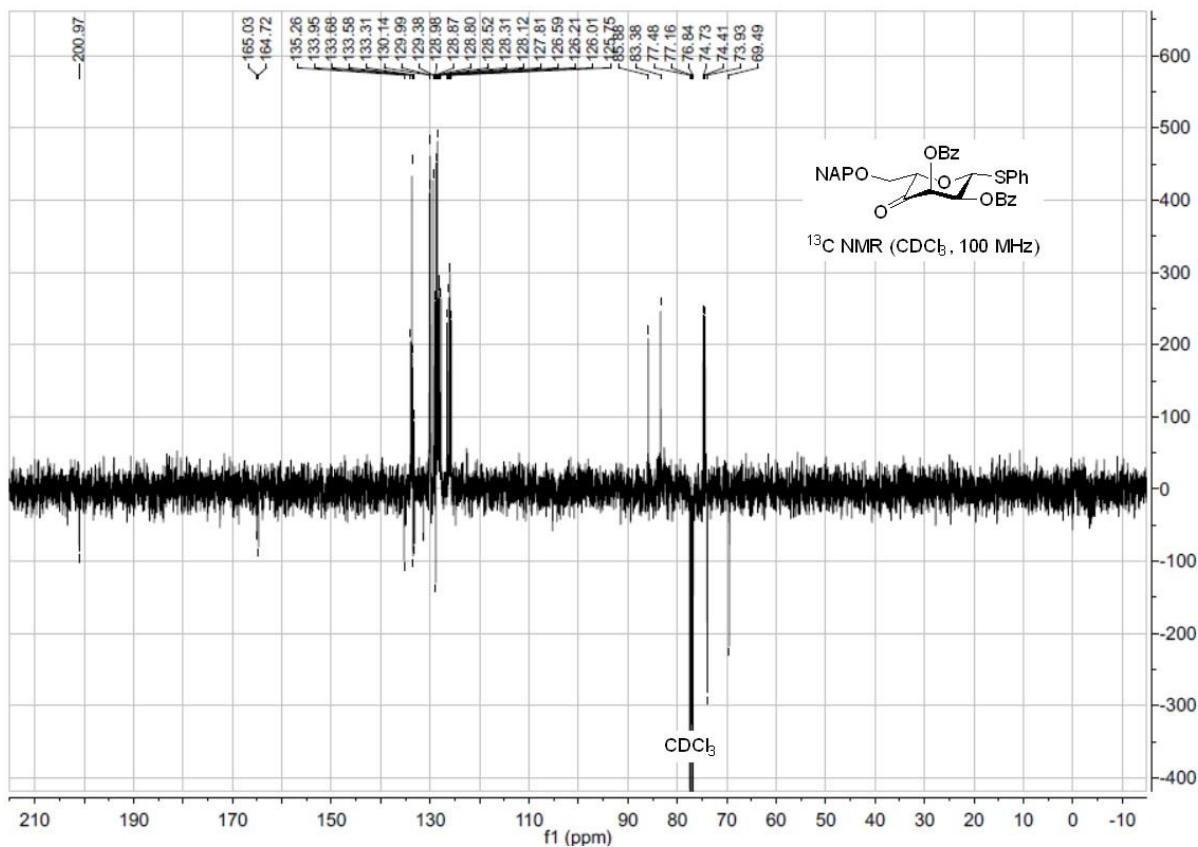



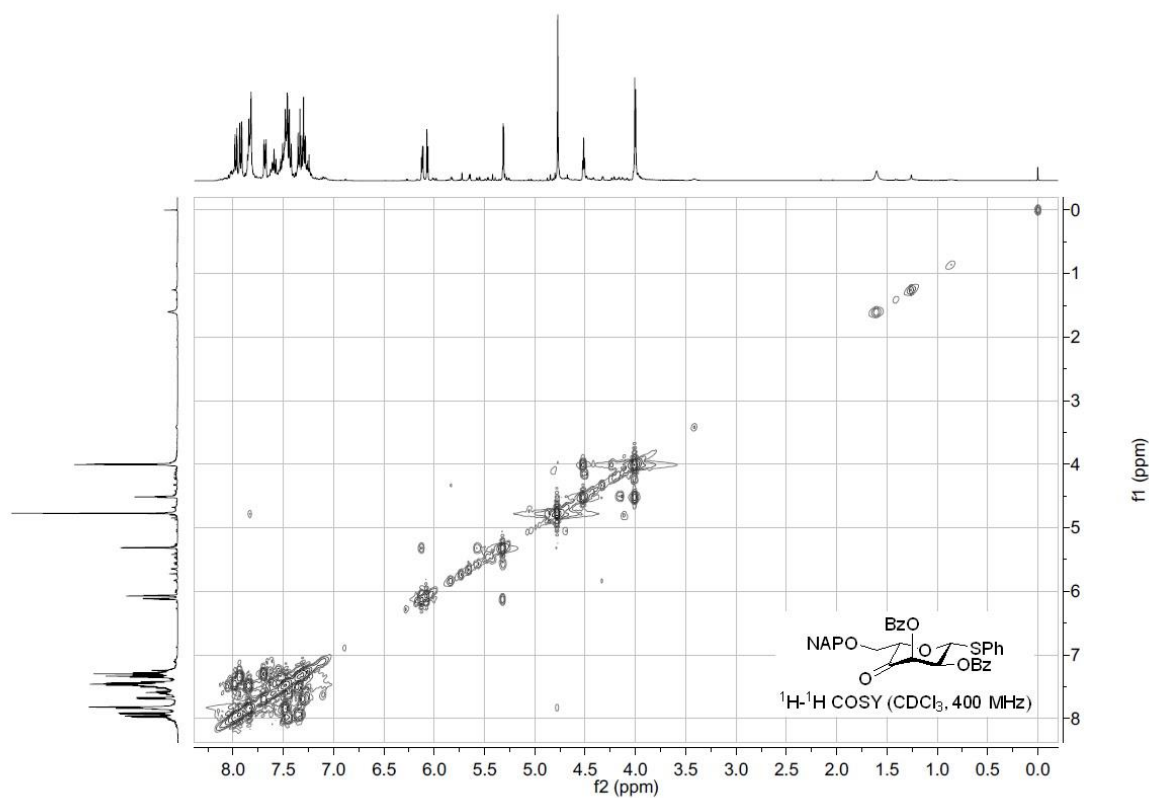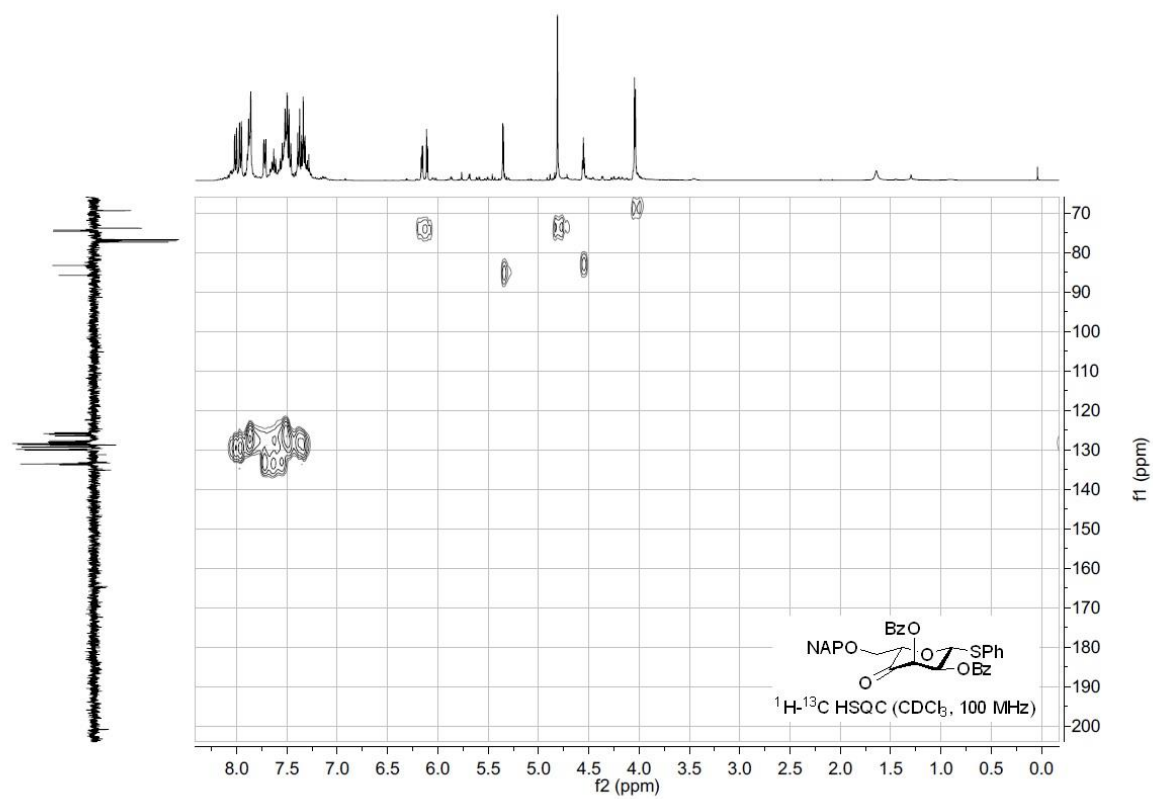

$^1\text{H}$  and  $^{13}\text{C}$  NMR spectra of compound **62**

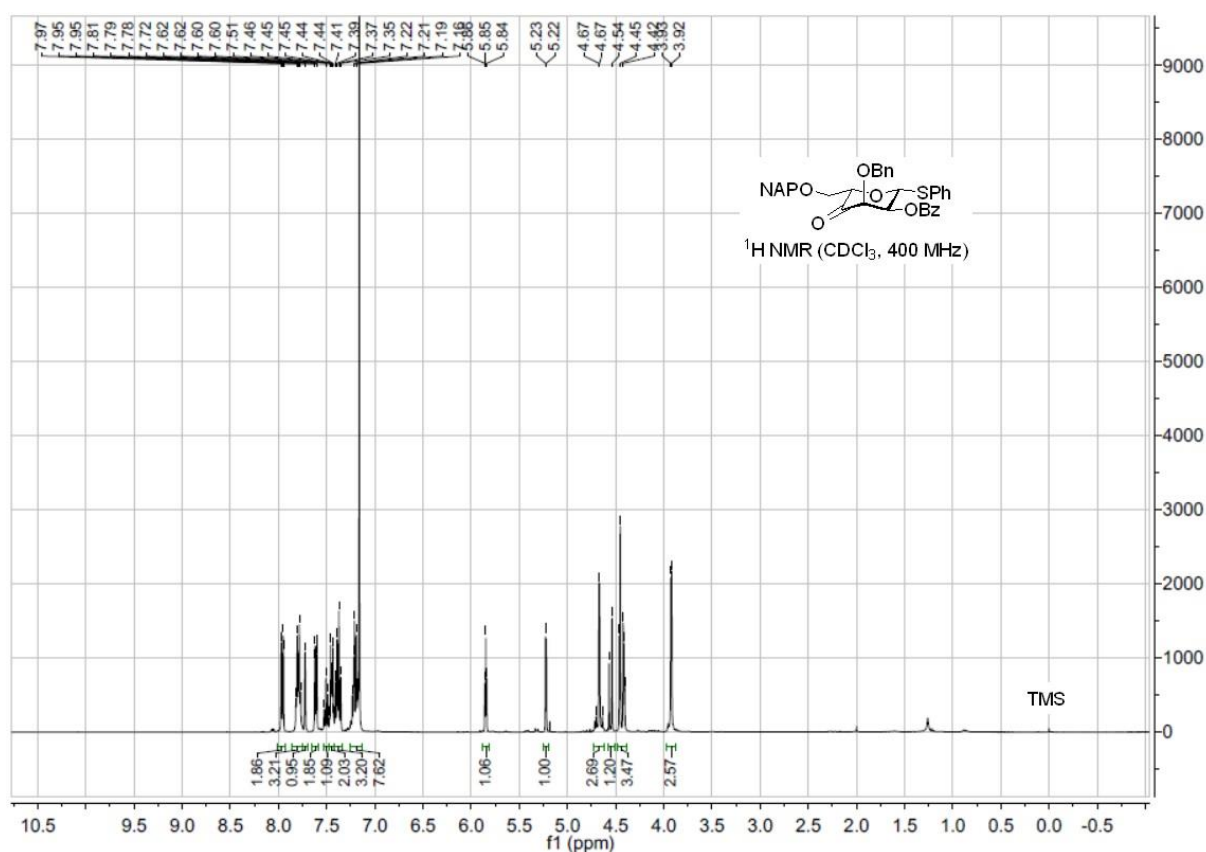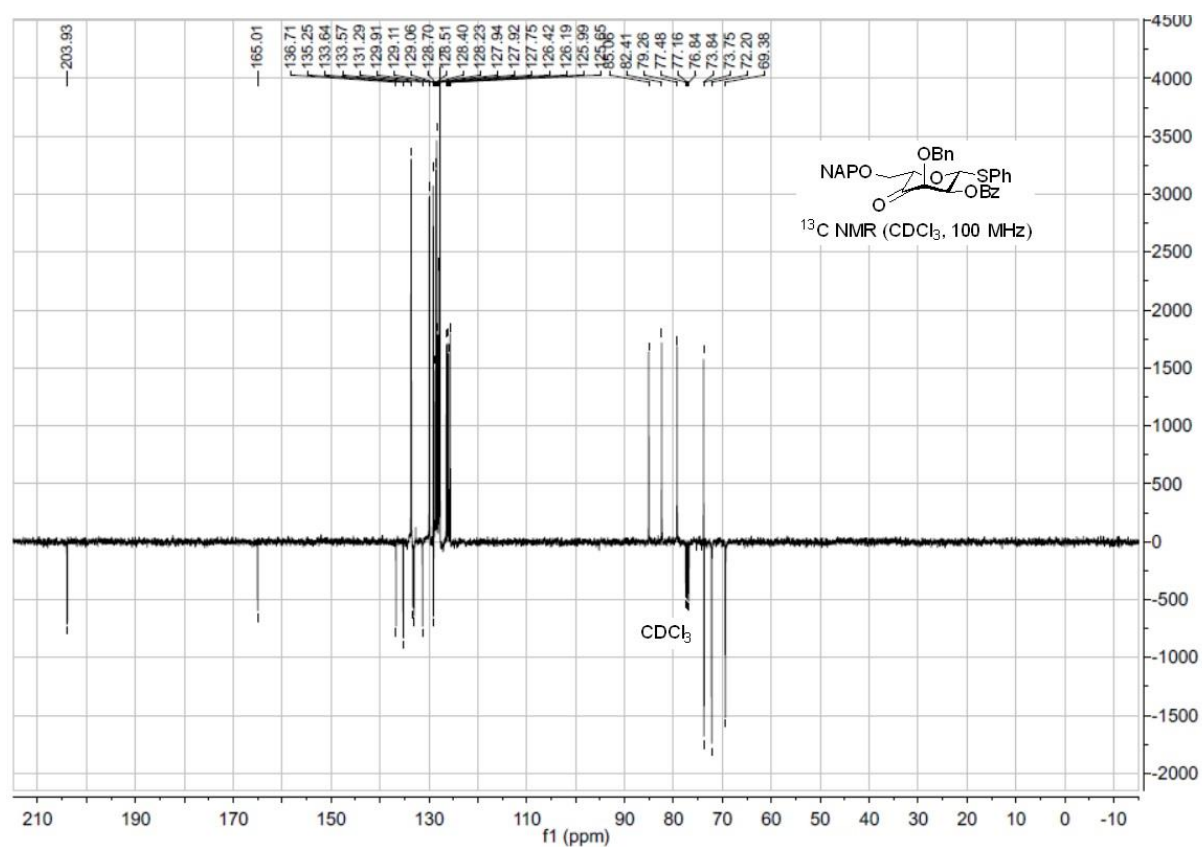

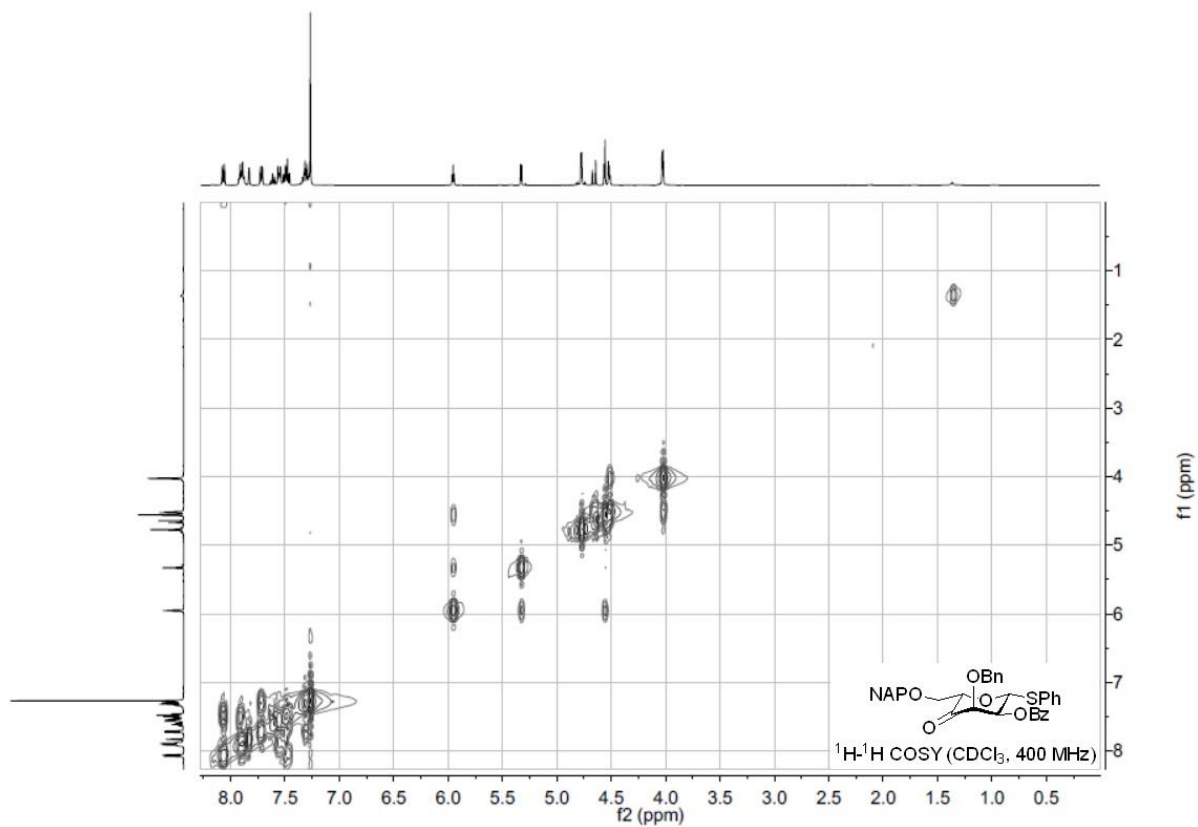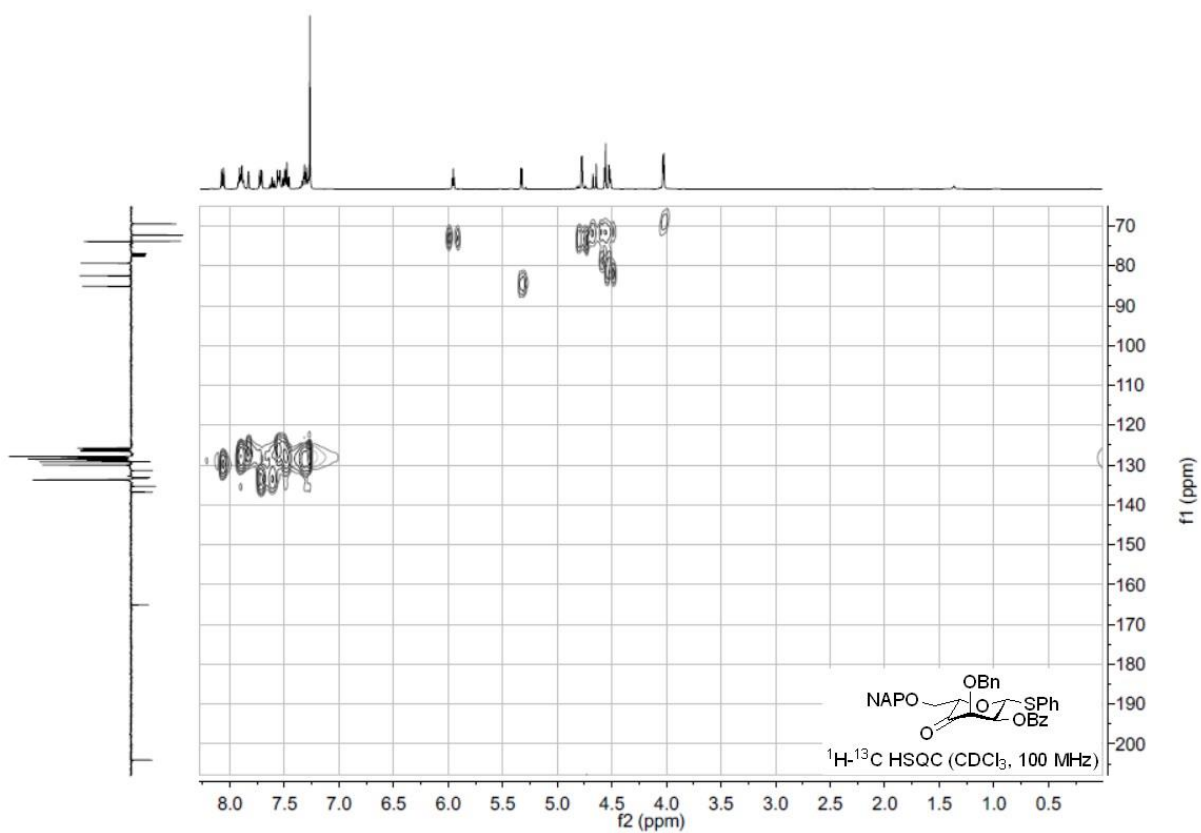

$^1\text{H}$  and  $^{13}\text{C}$  NMR spectra of compound **63**

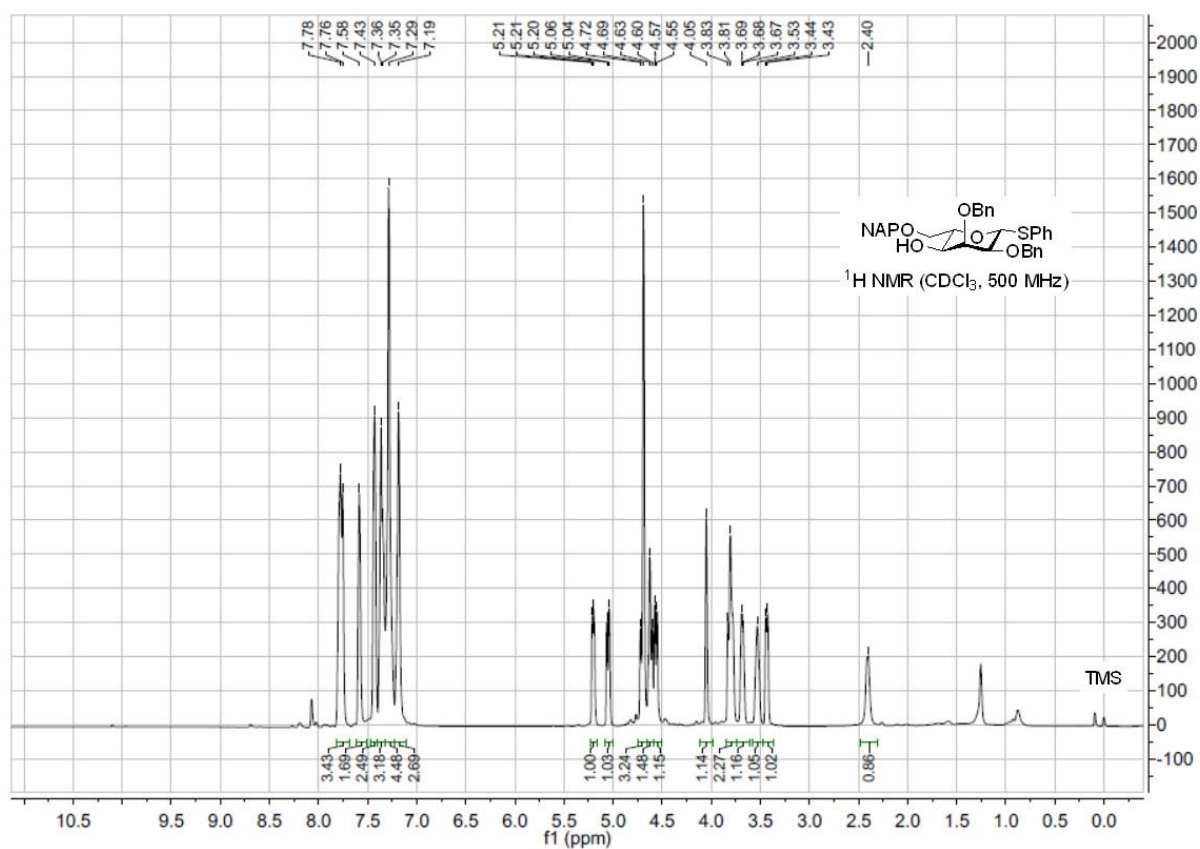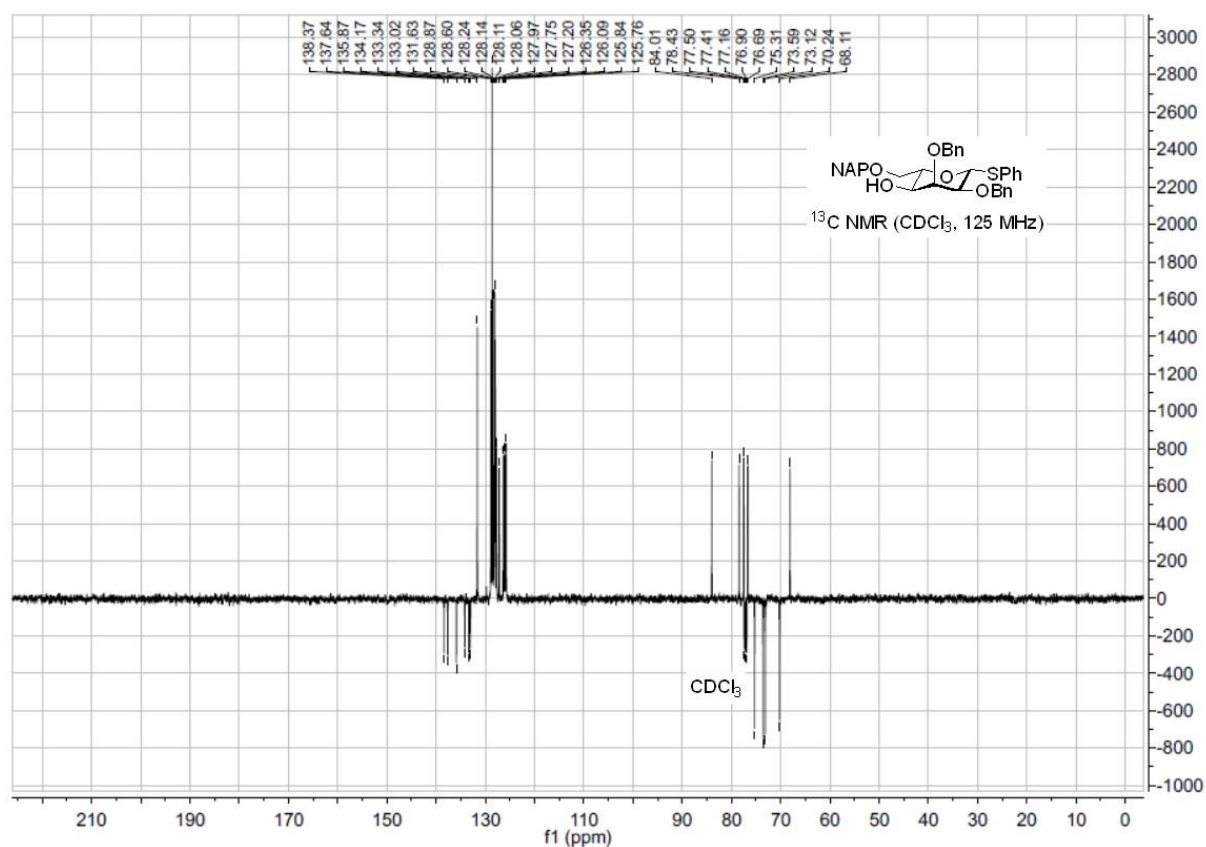

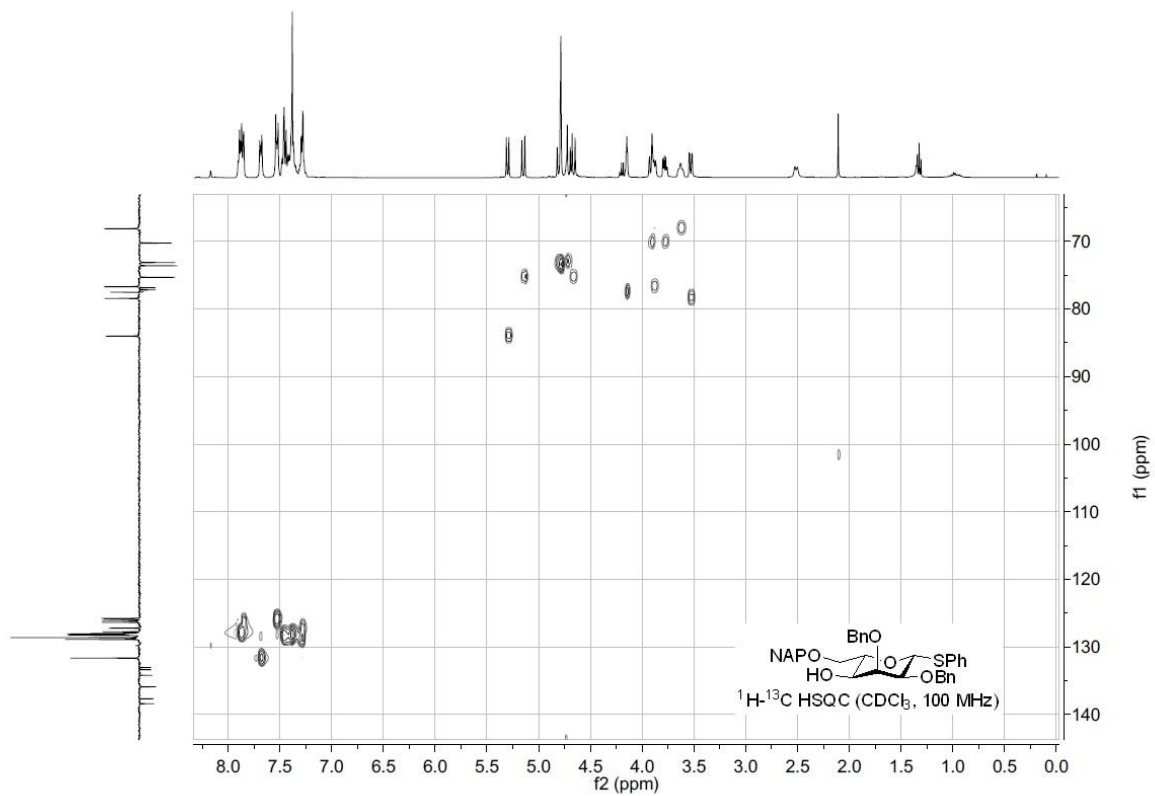

$^1\text{H}$  and  $^{13}\text{C}$  NMR spectra of the mixture of compound **64** and **58**

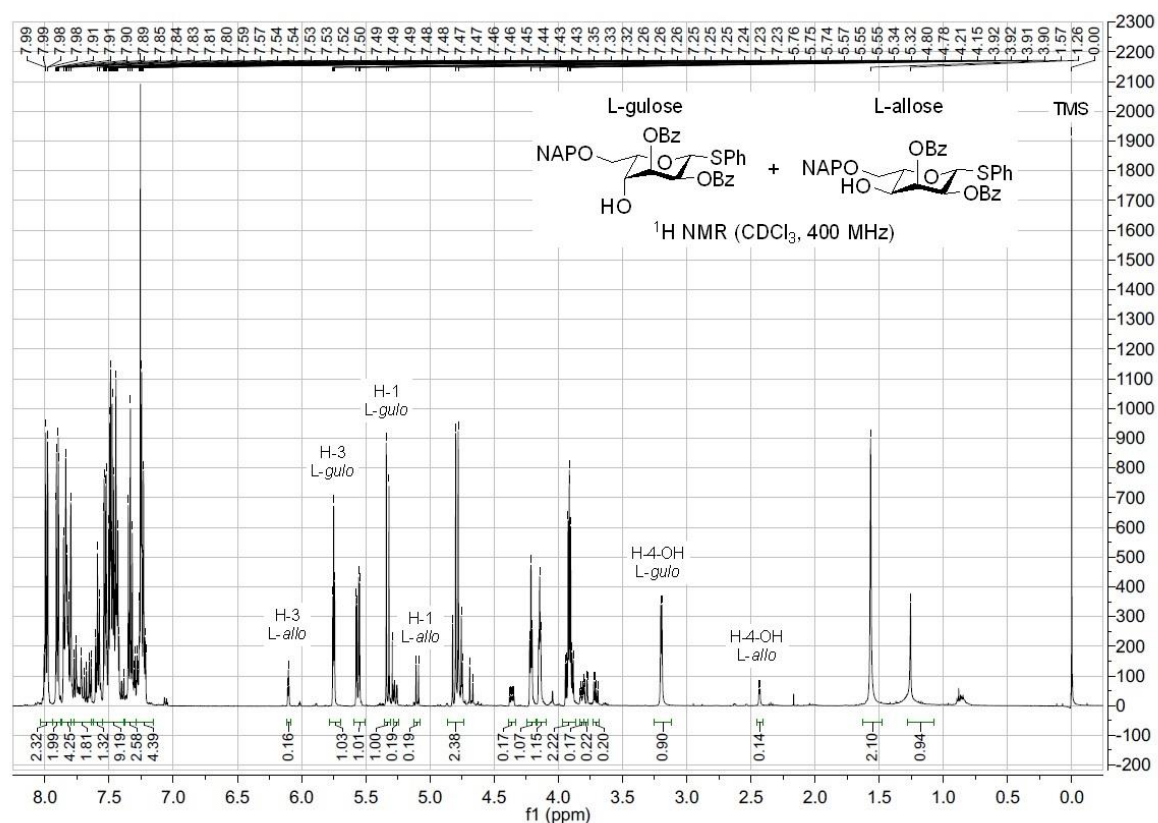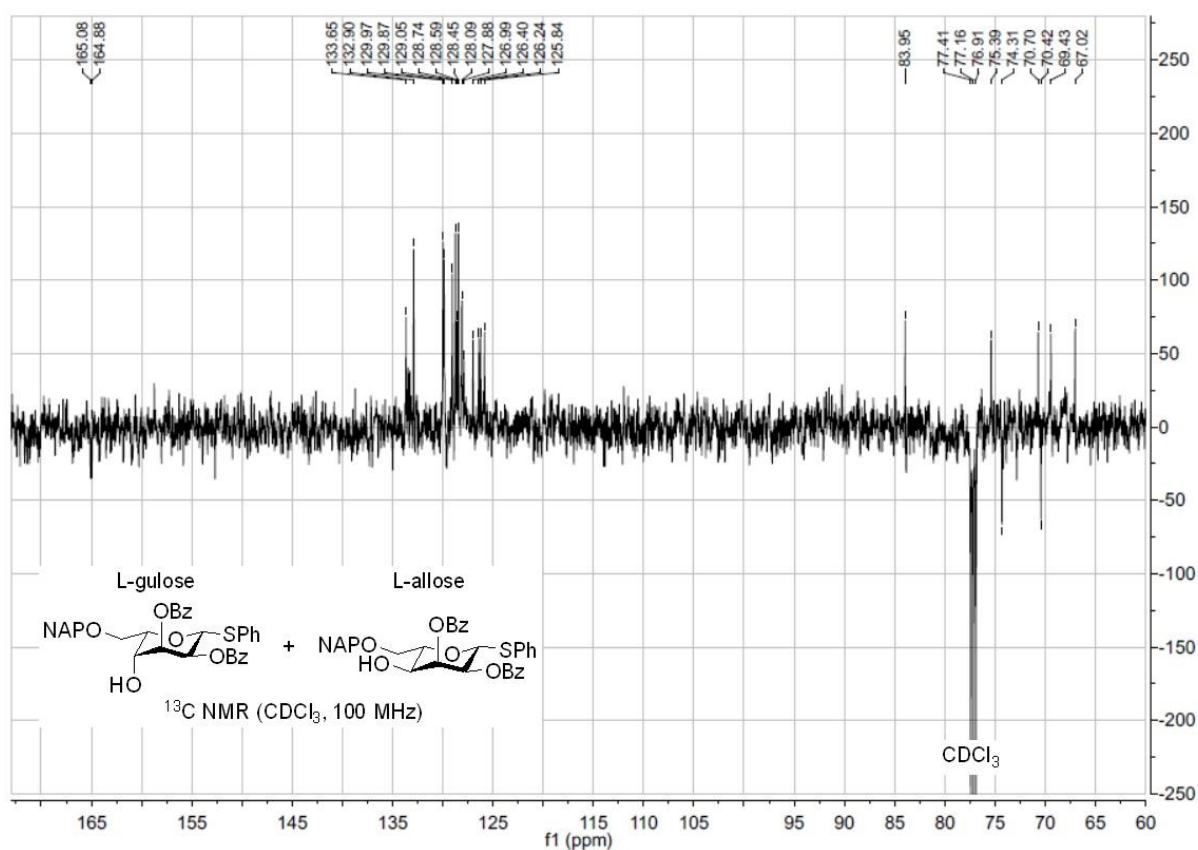

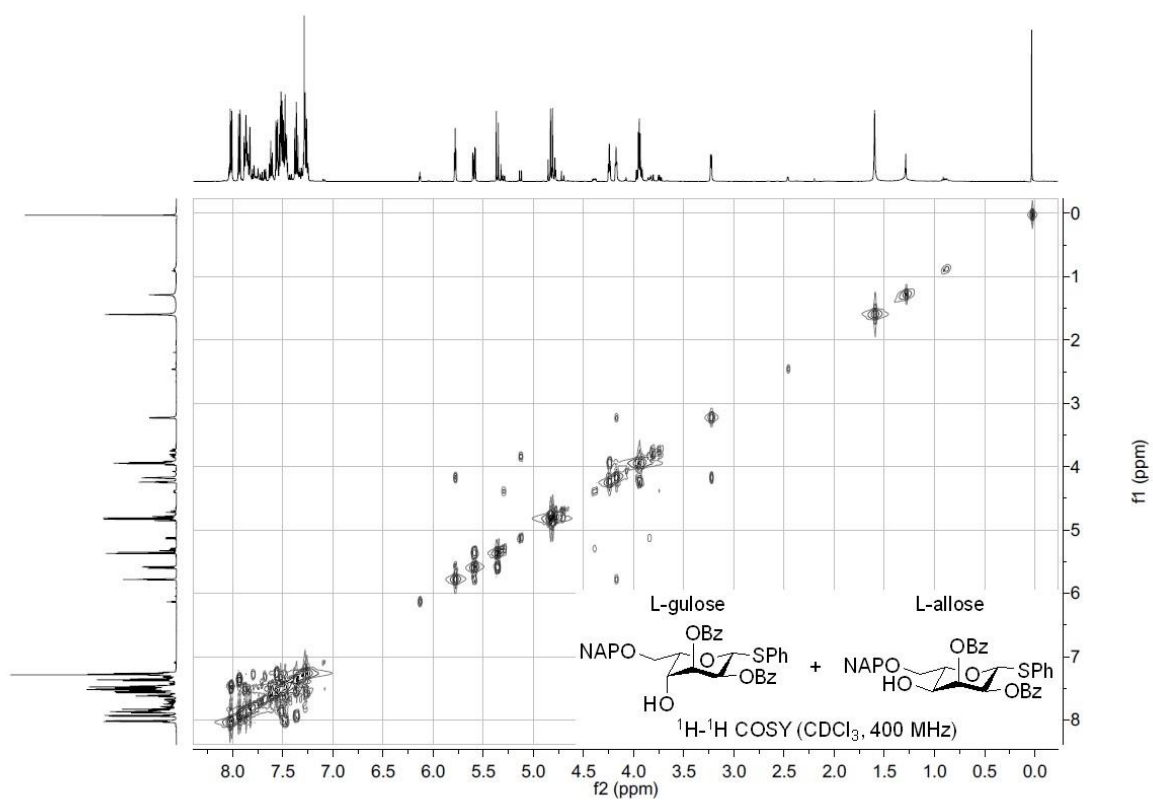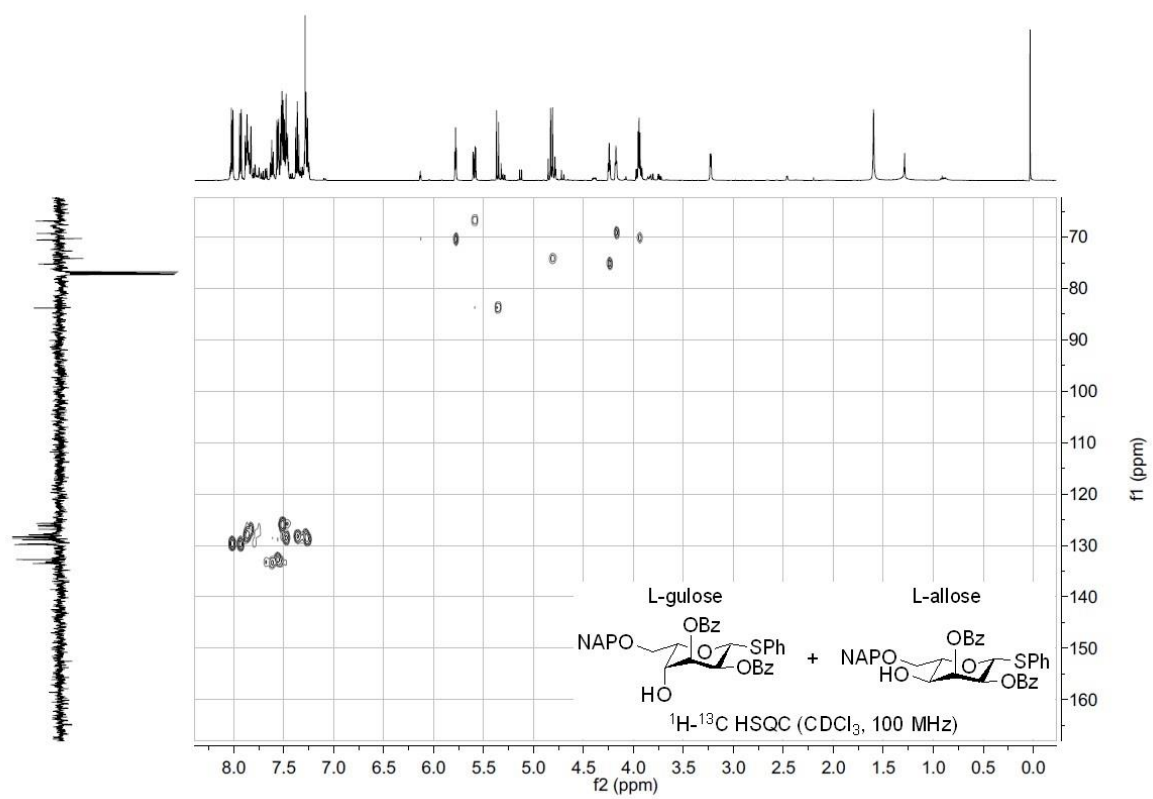



$^1\text{H}$  and  $^{13}\text{C}$  NMR spectra of compound 65

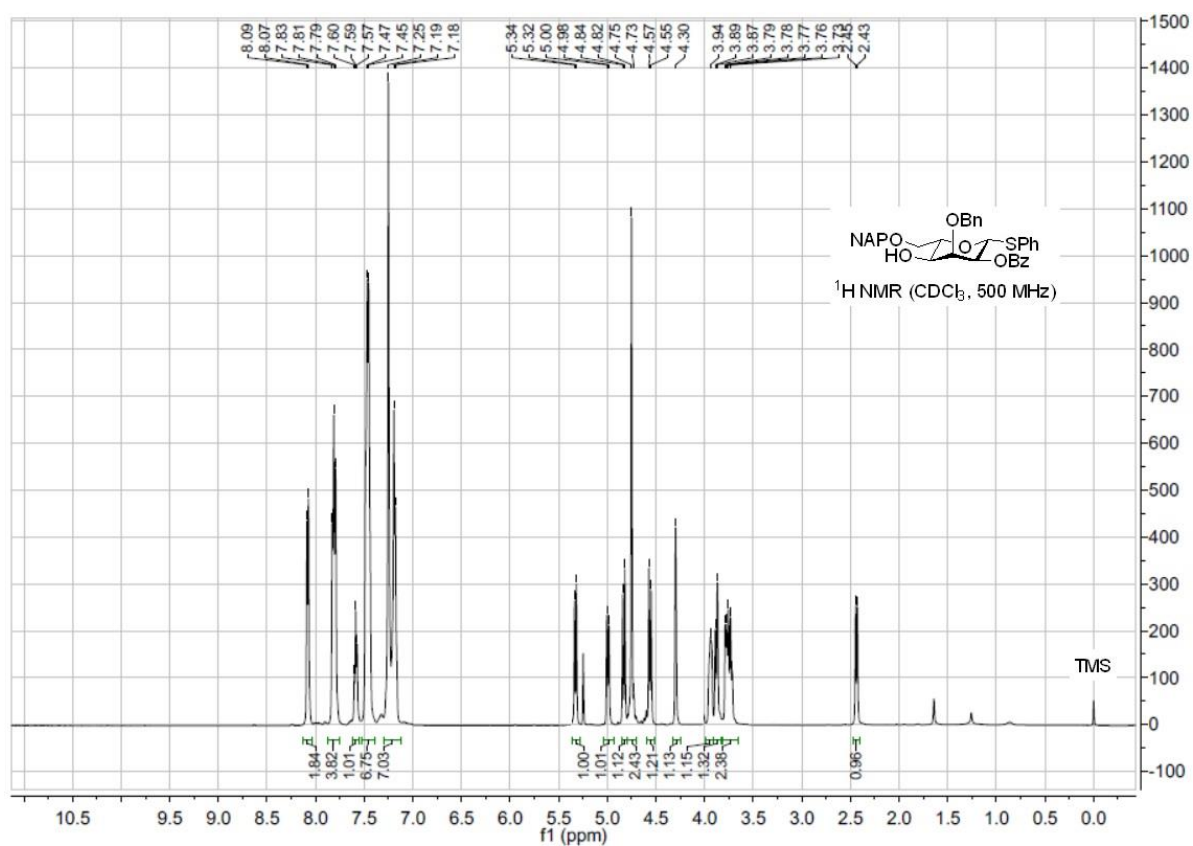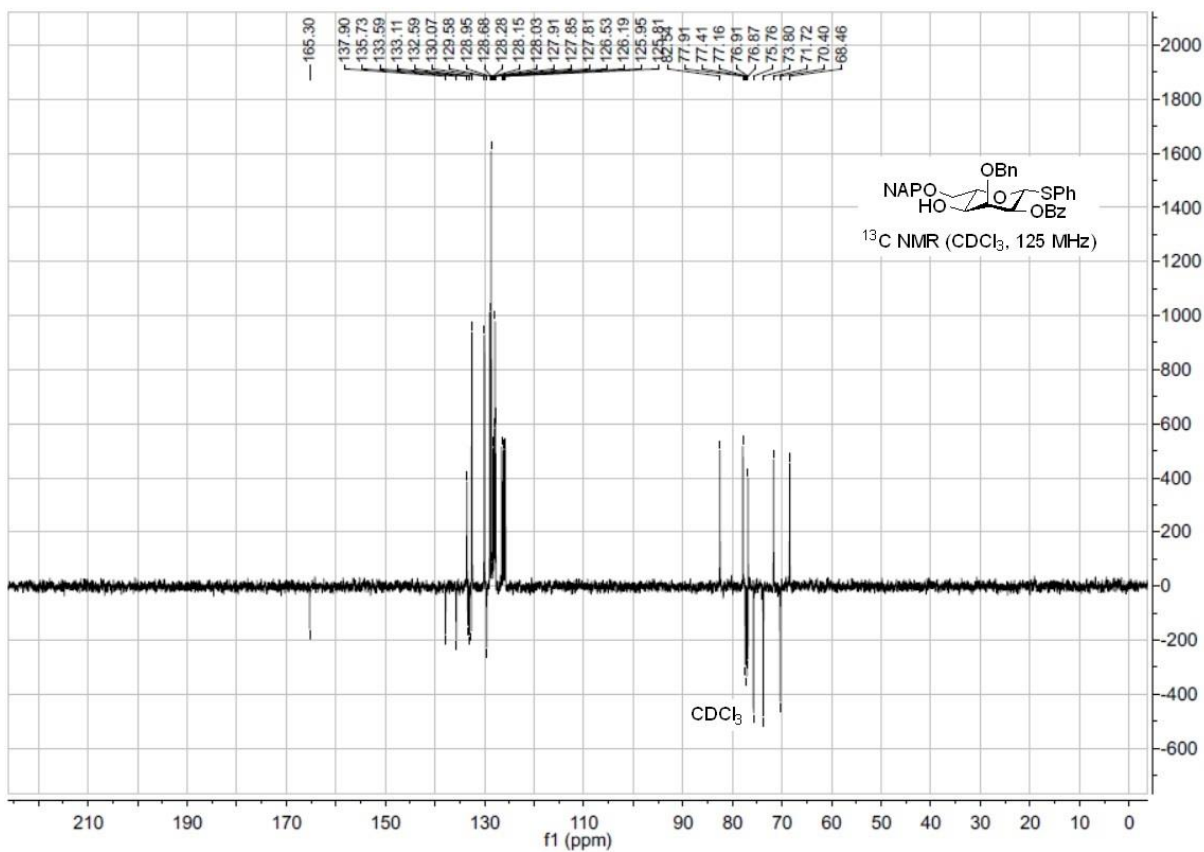

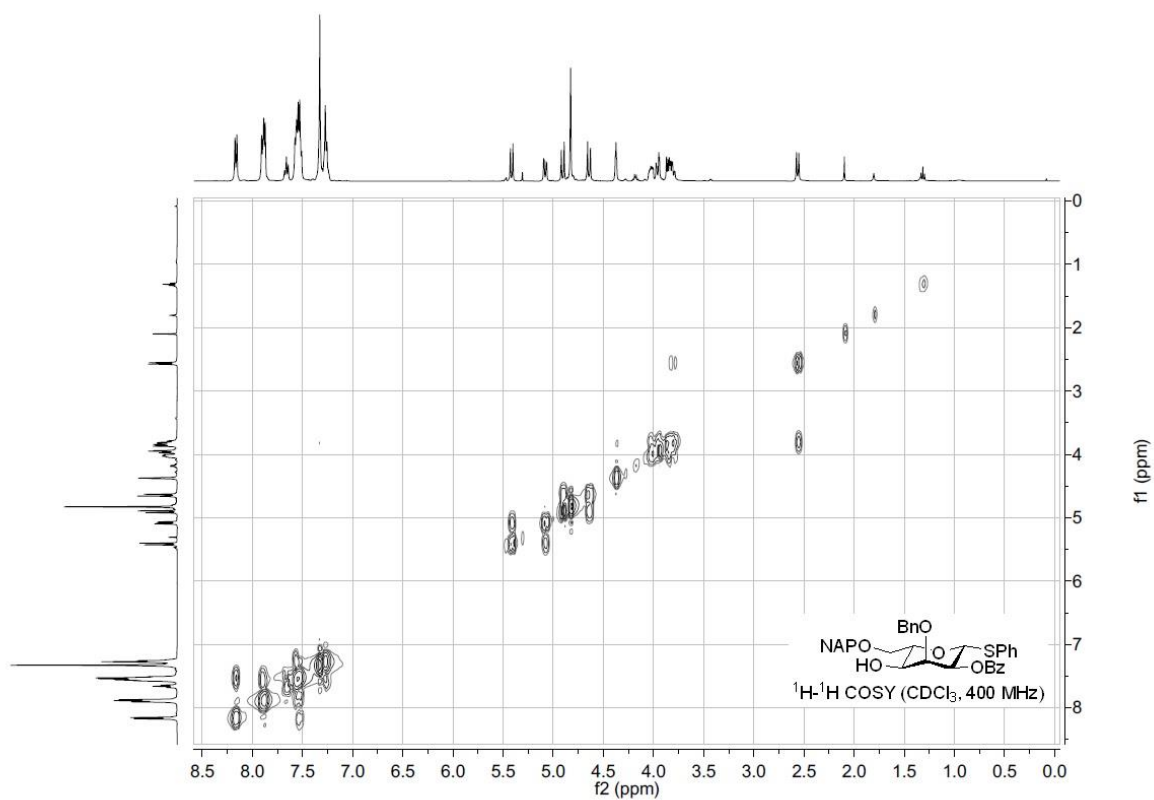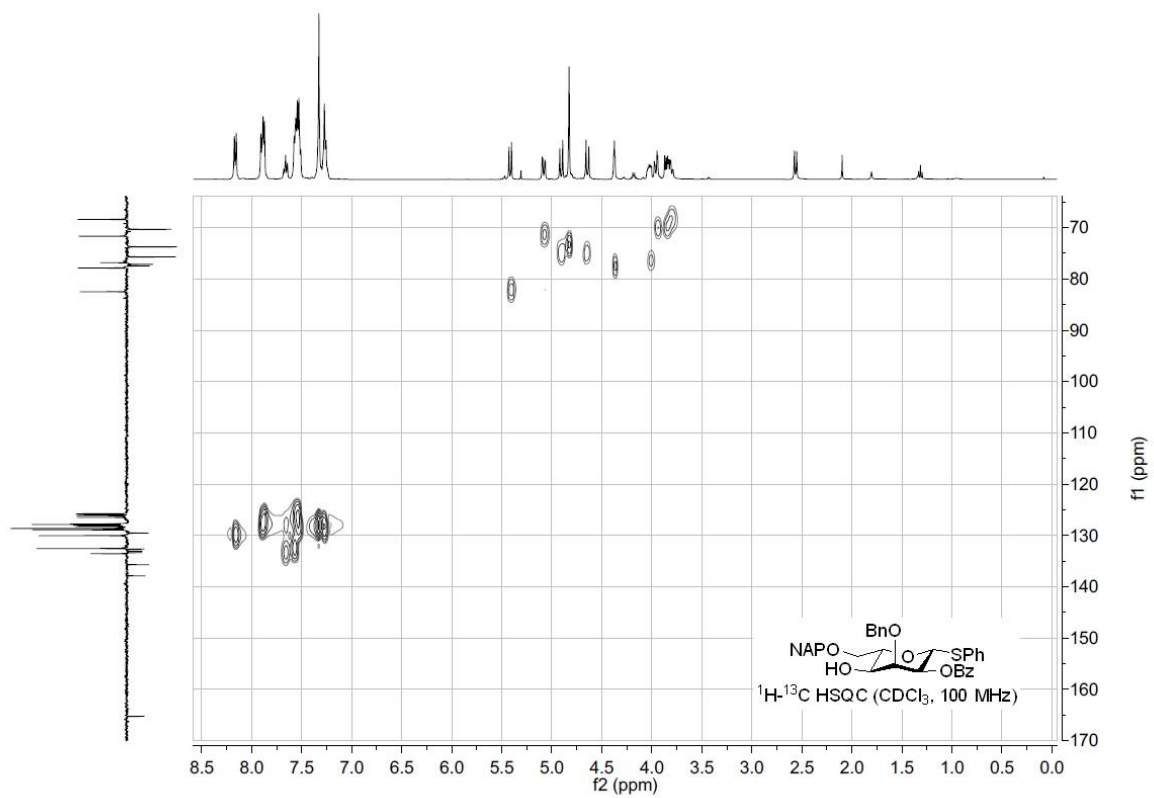

$^1\text{H}$  and  $^{13}\text{C}$  NMR spectra of compound 66

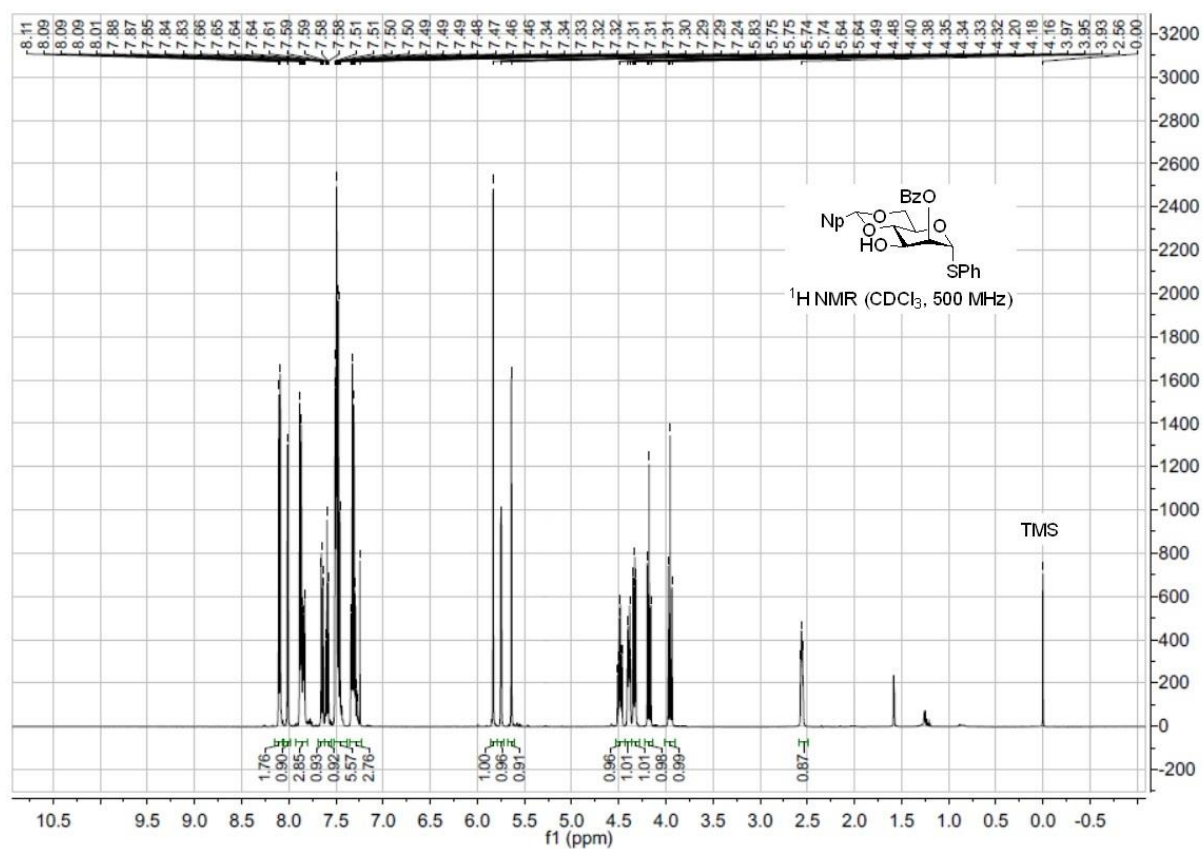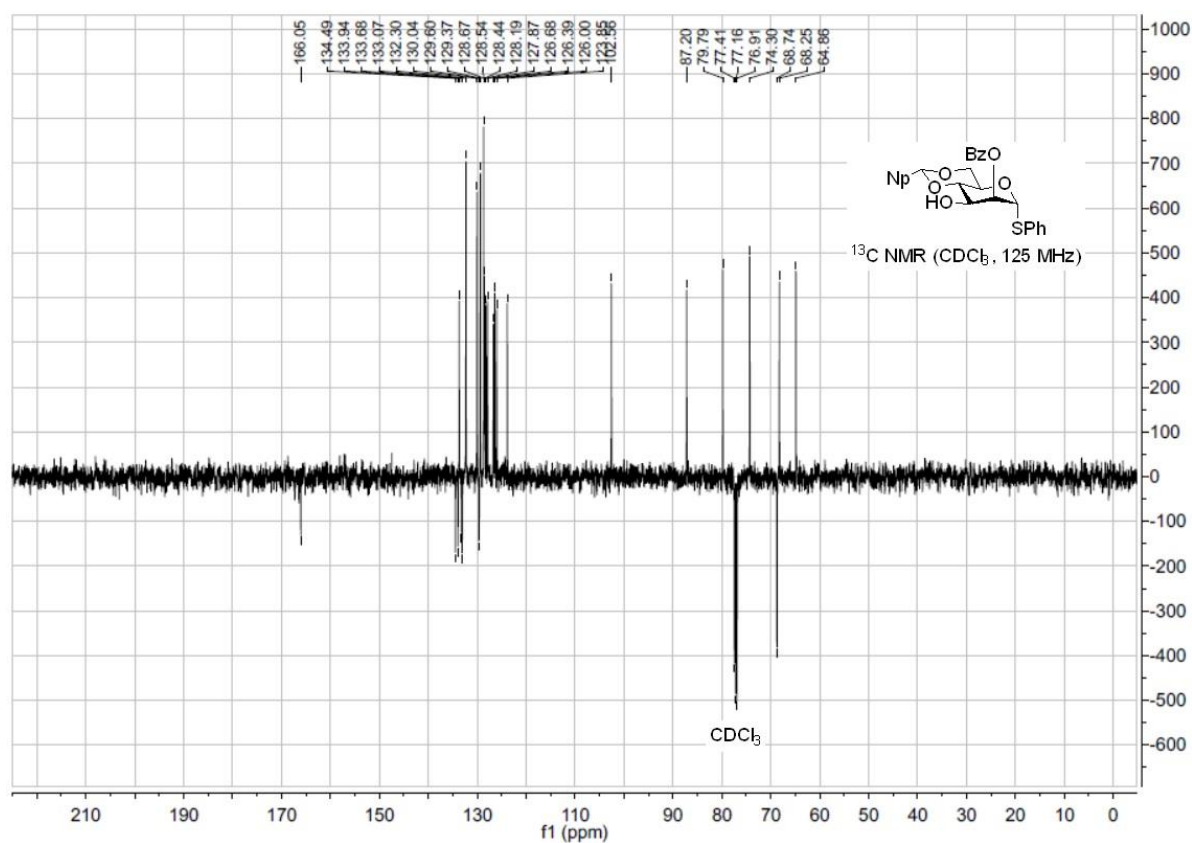

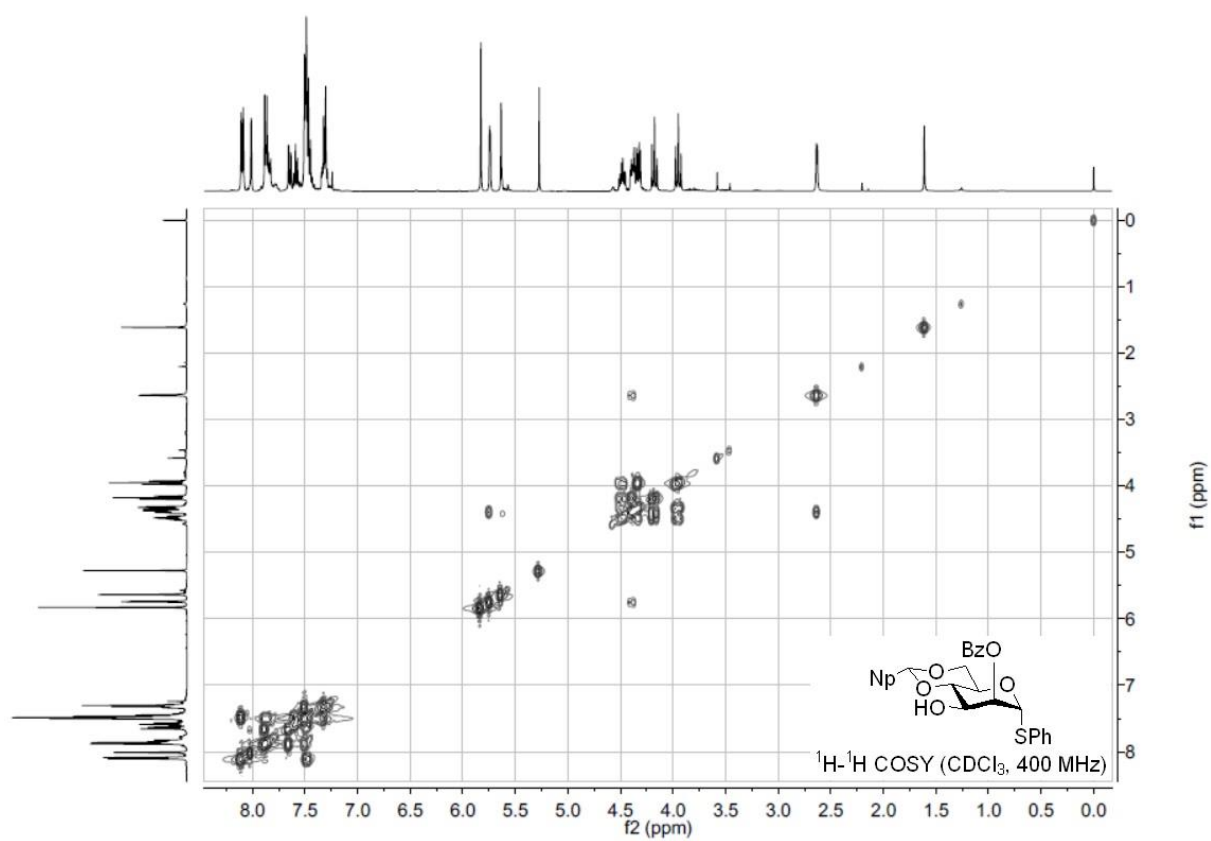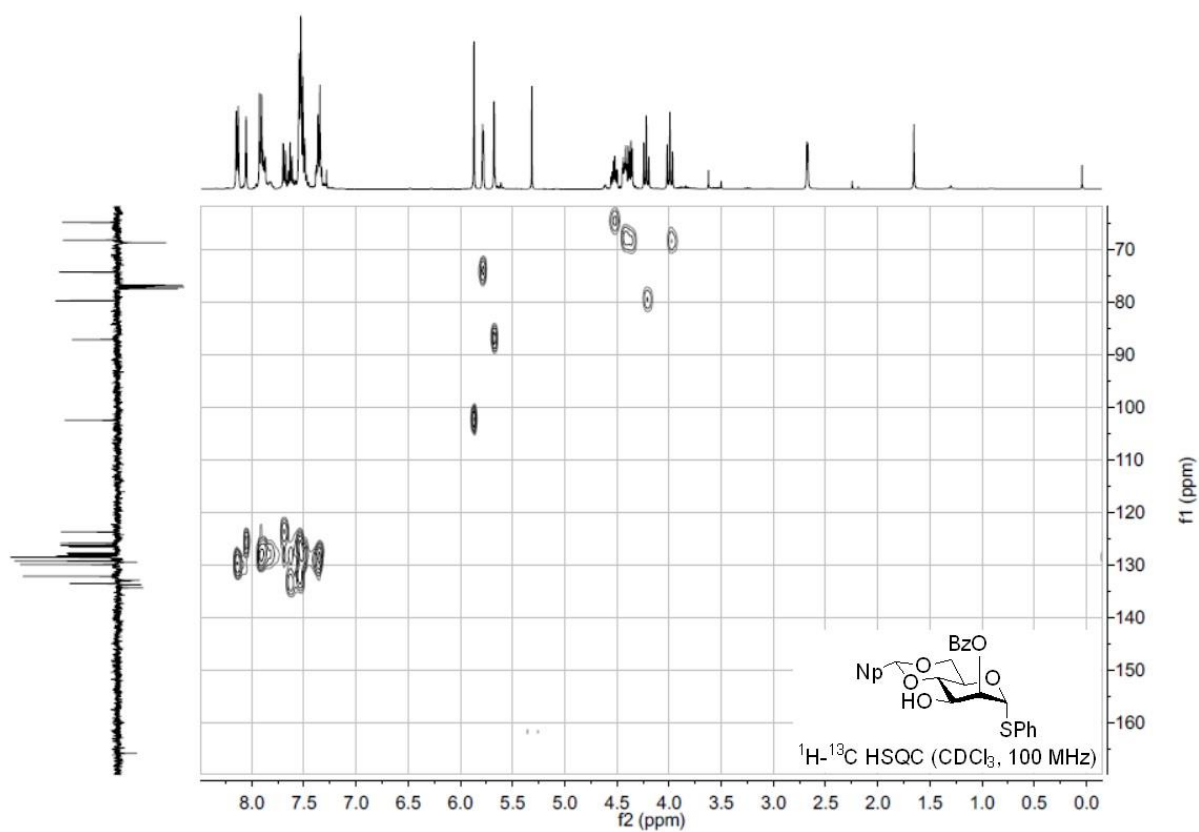

# <sup>1</sup>H and <sup>13</sup>C NMR spectra of 3-ulose

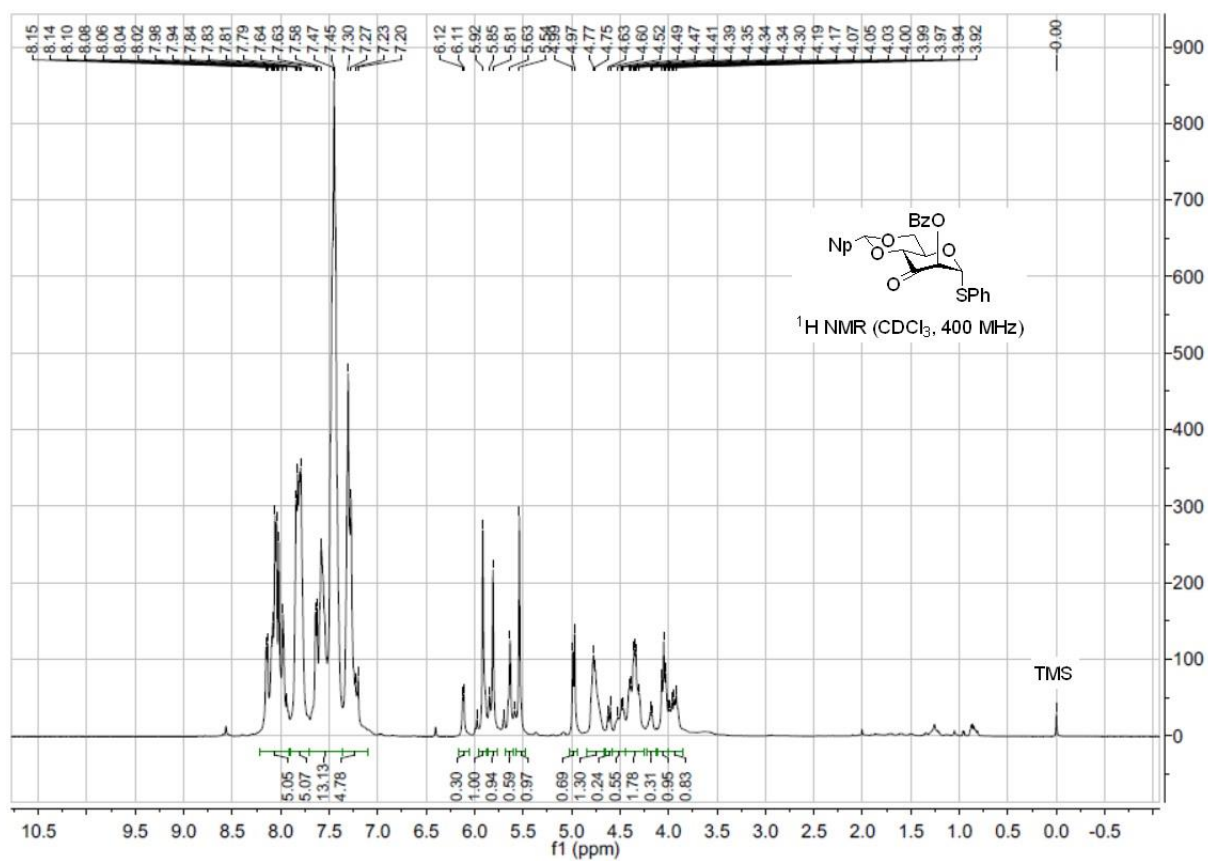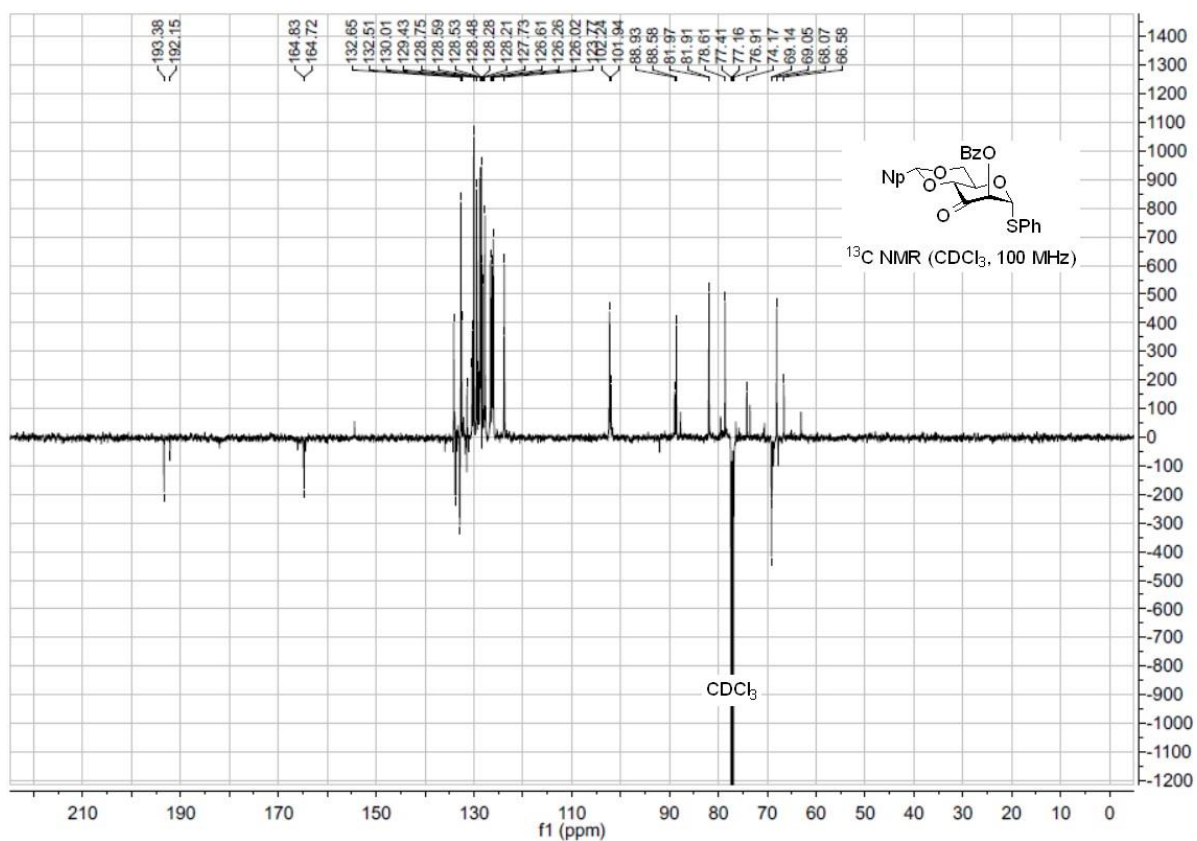

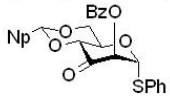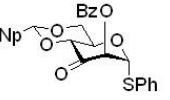



$^1\text{H}$  and  $^{13}\text{C}$  NMR spectra of compound **67**

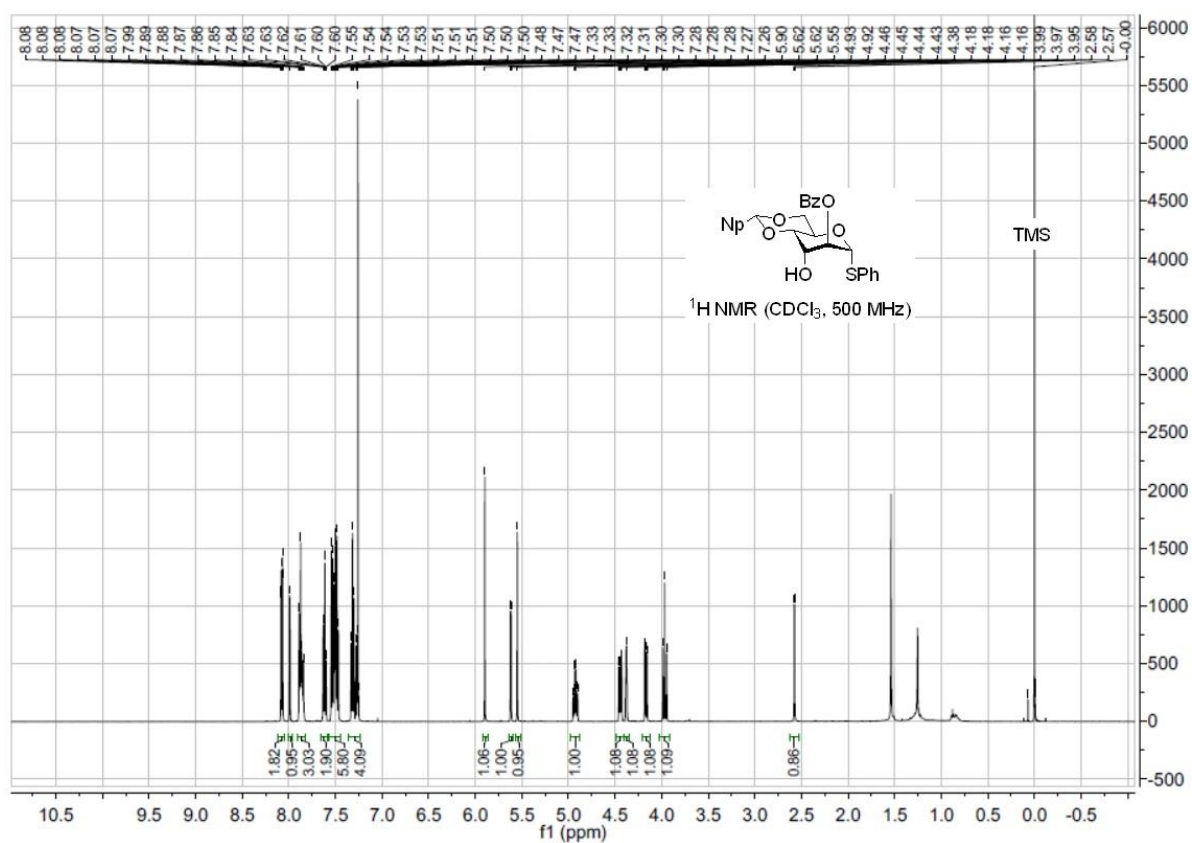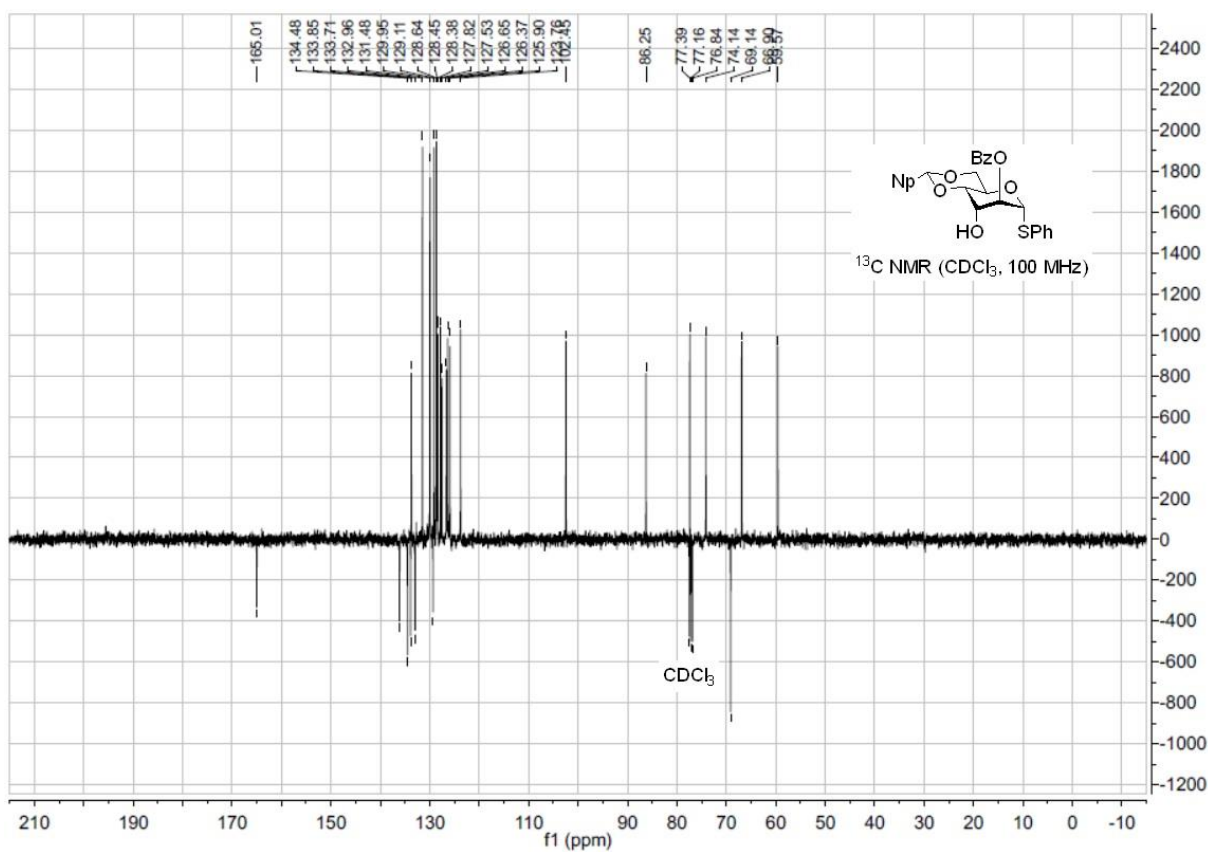



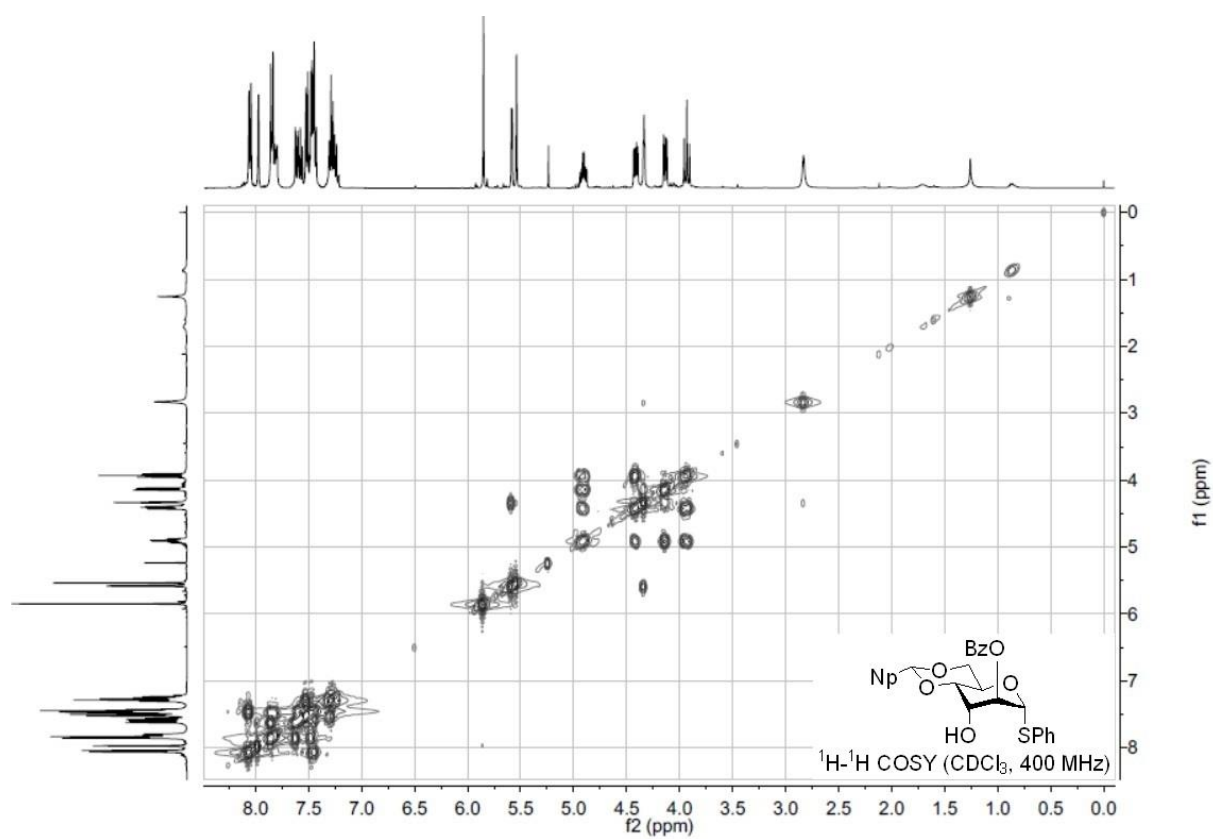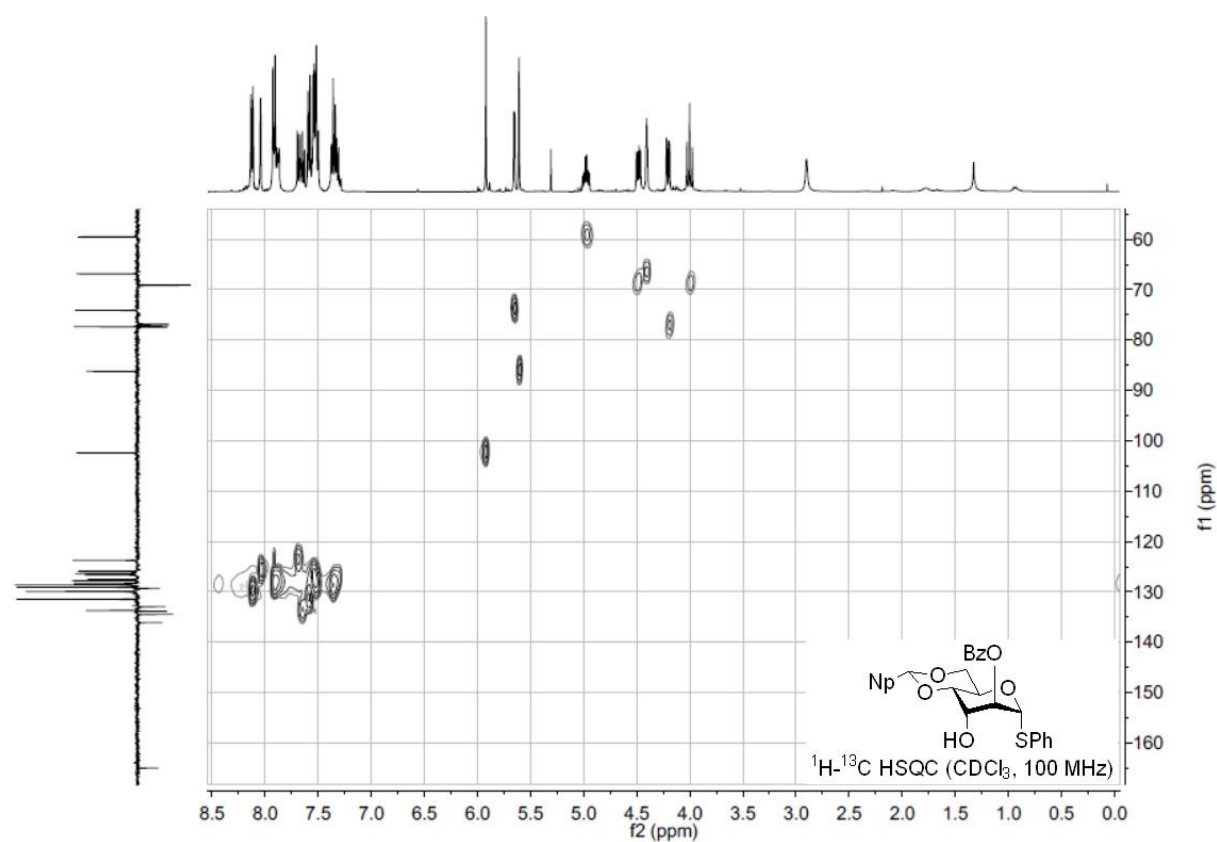

$^1\text{H}$  and  $^{13}\text{C}$  NMR spectra of compound **68**

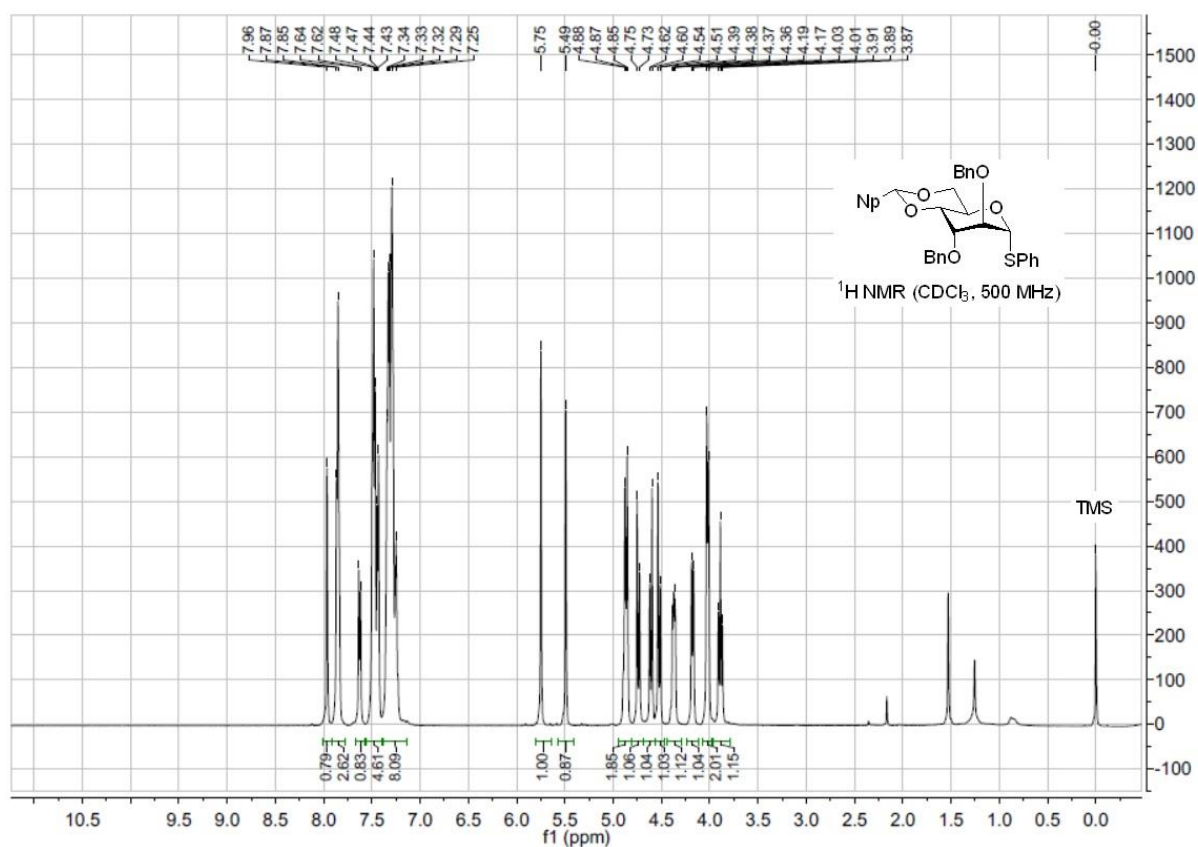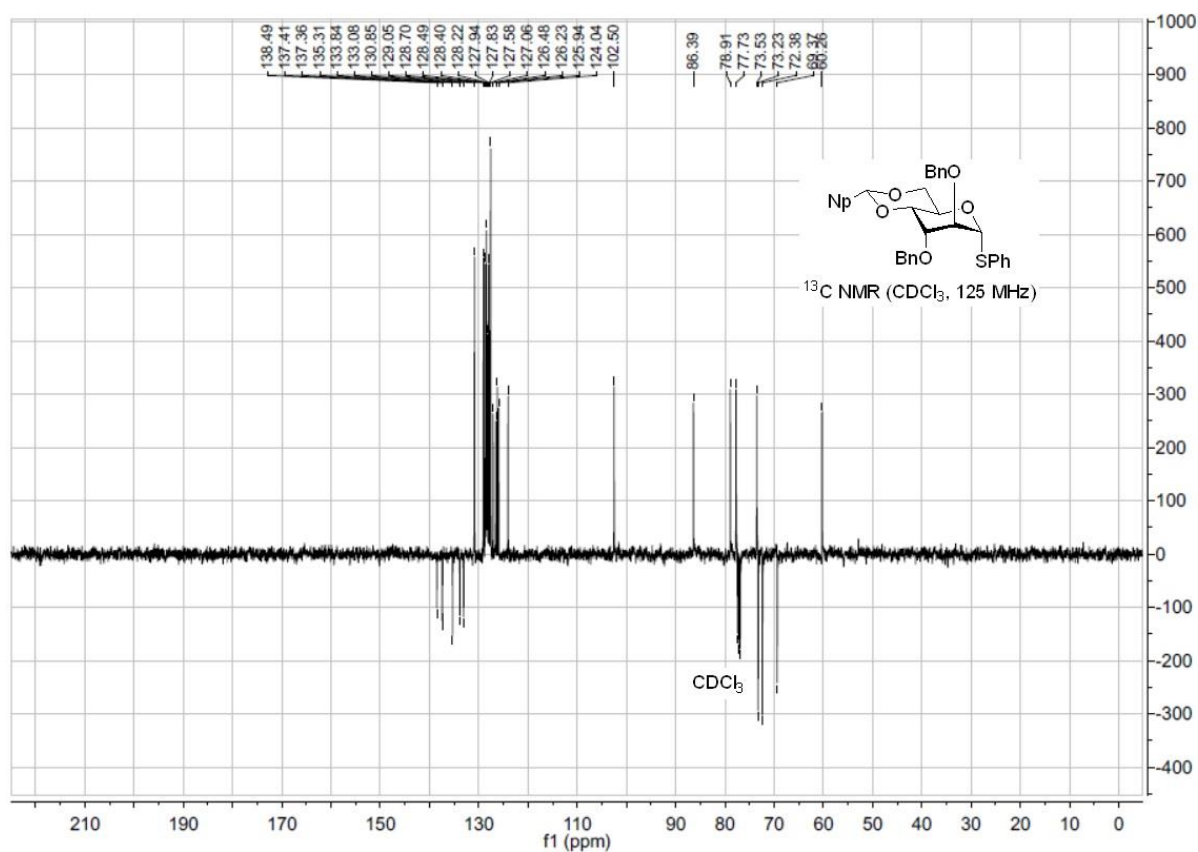

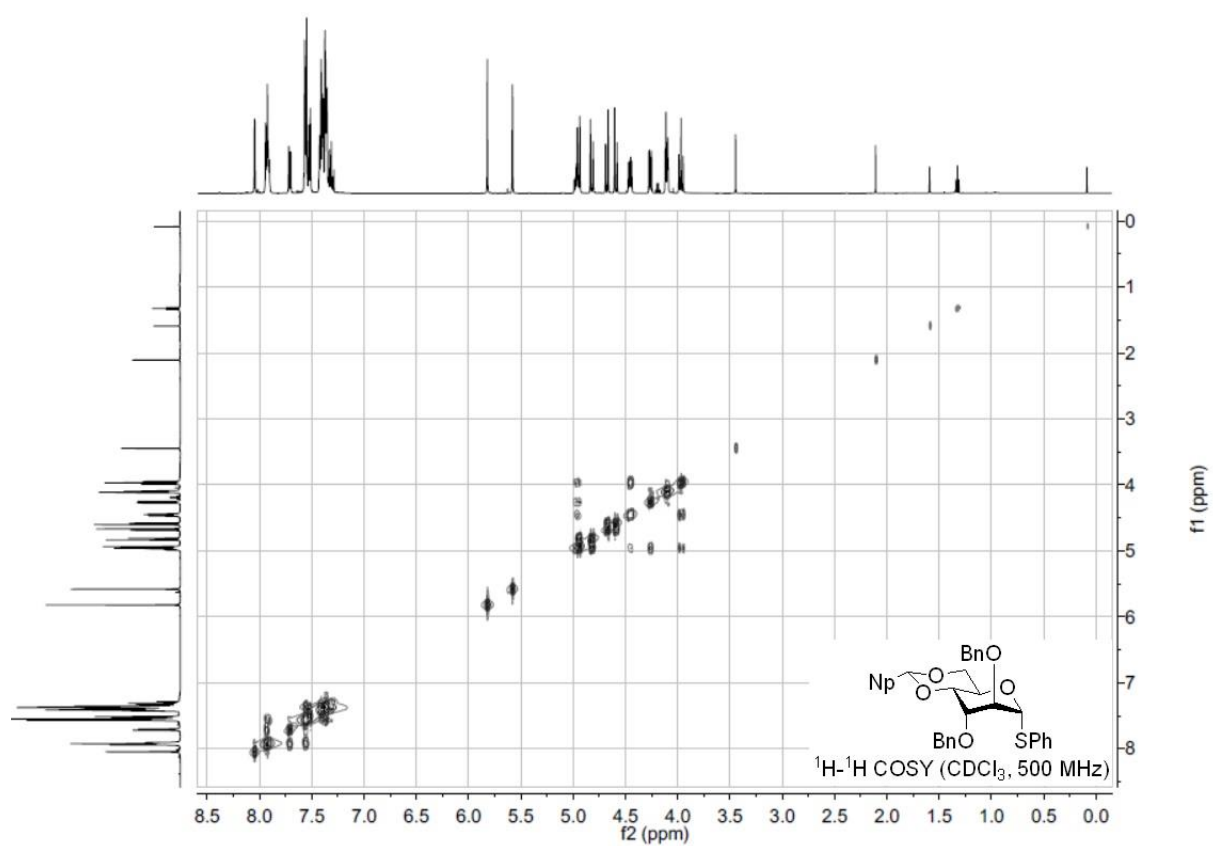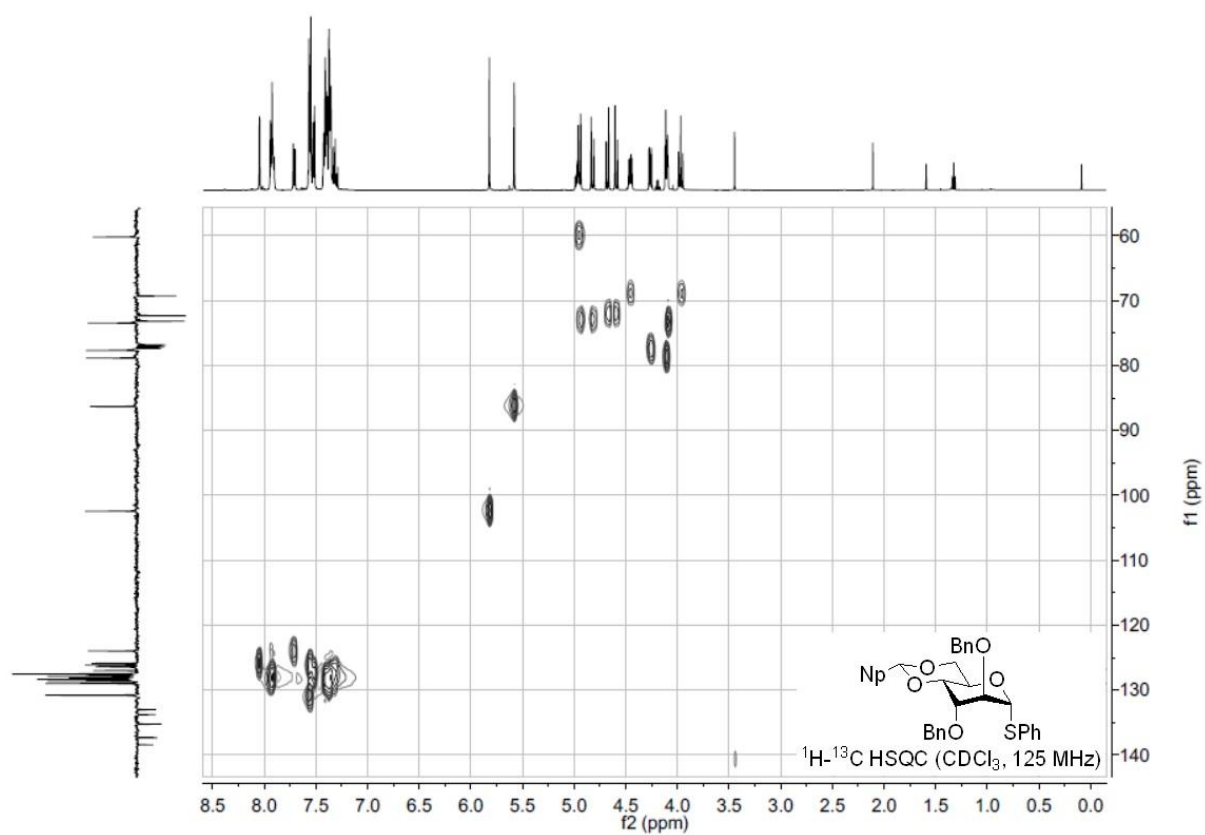

$^1\text{H}$  and  $^{13}\text{C}$  NMR spectra of compound **69**

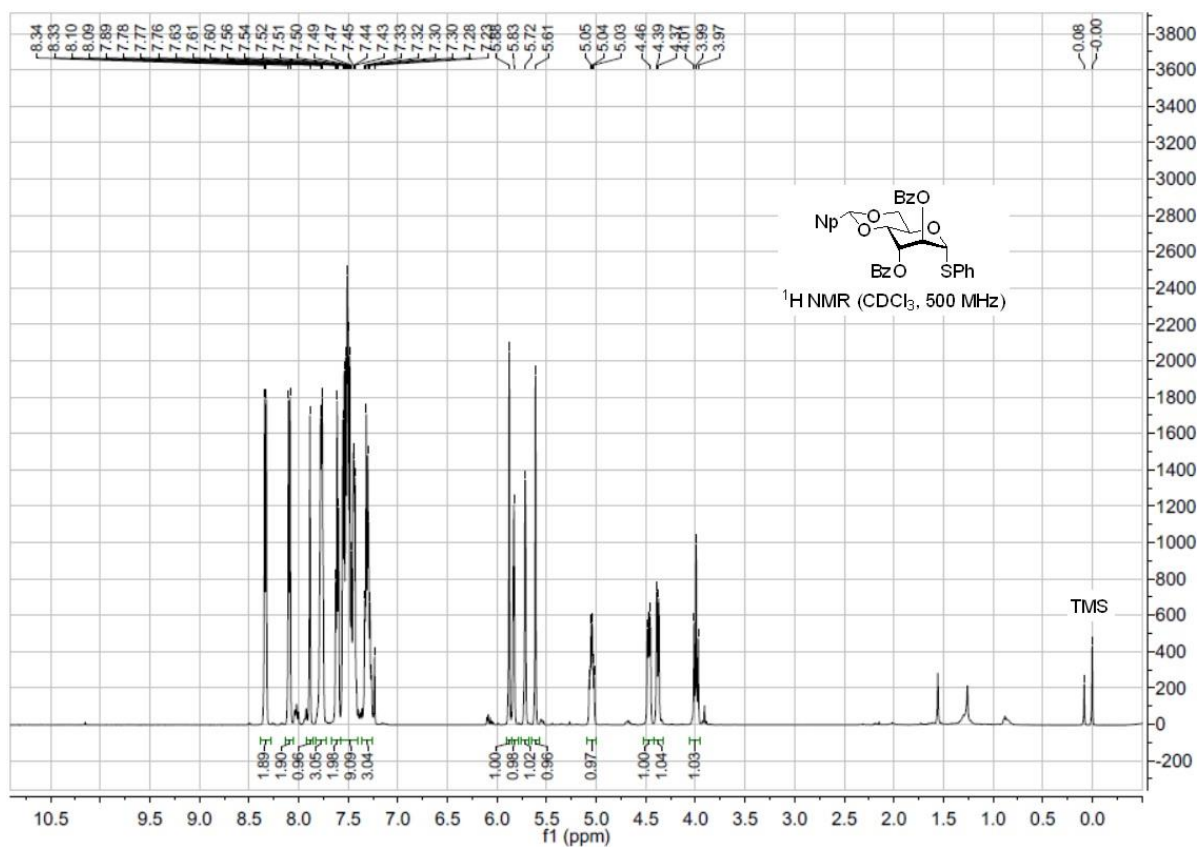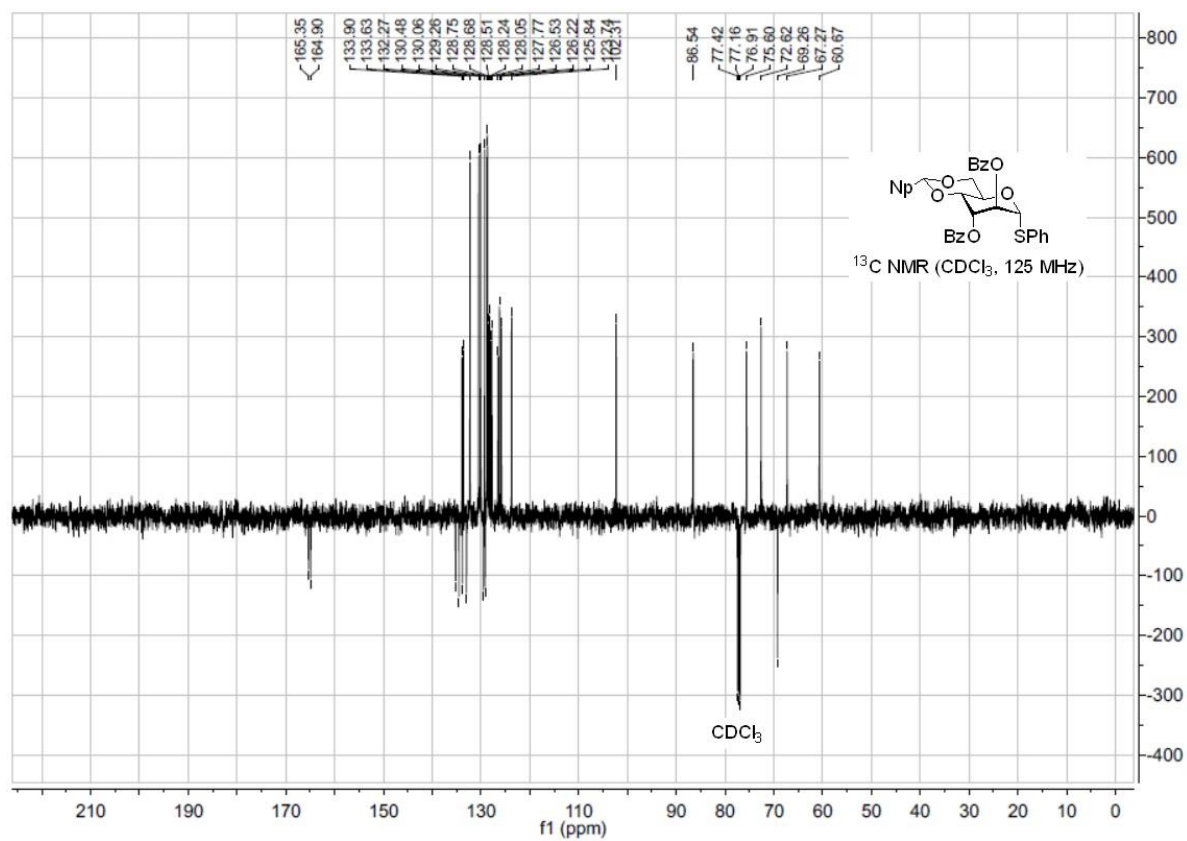

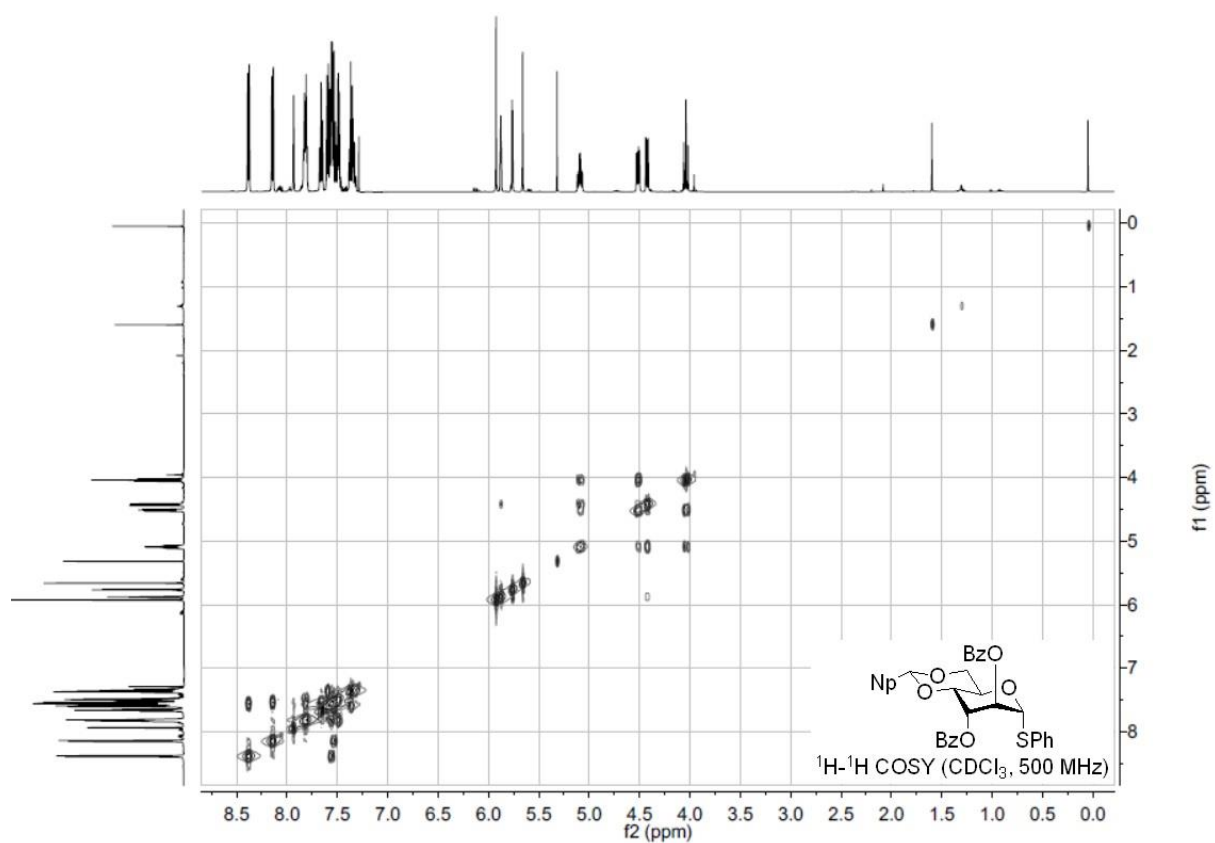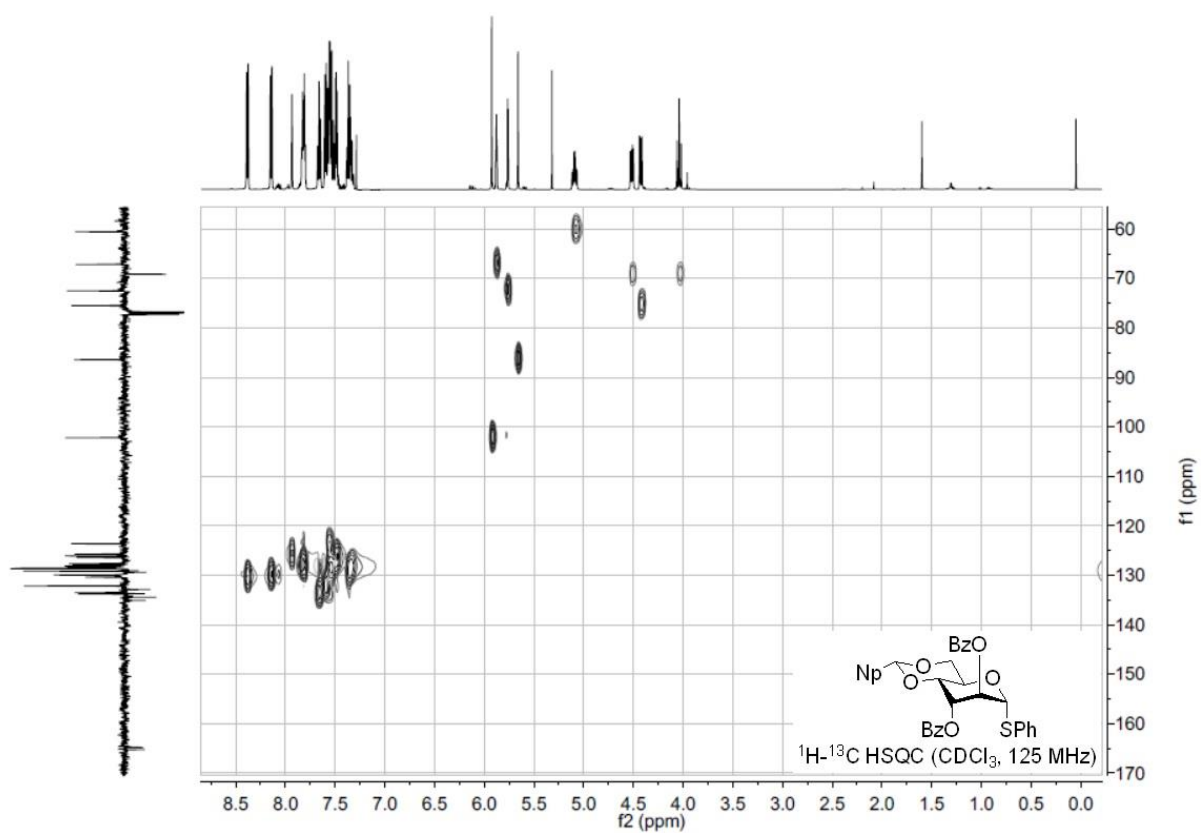

$^1\text{H}$  and  $^{13}\text{C}$  NMR spectra of compound **70**

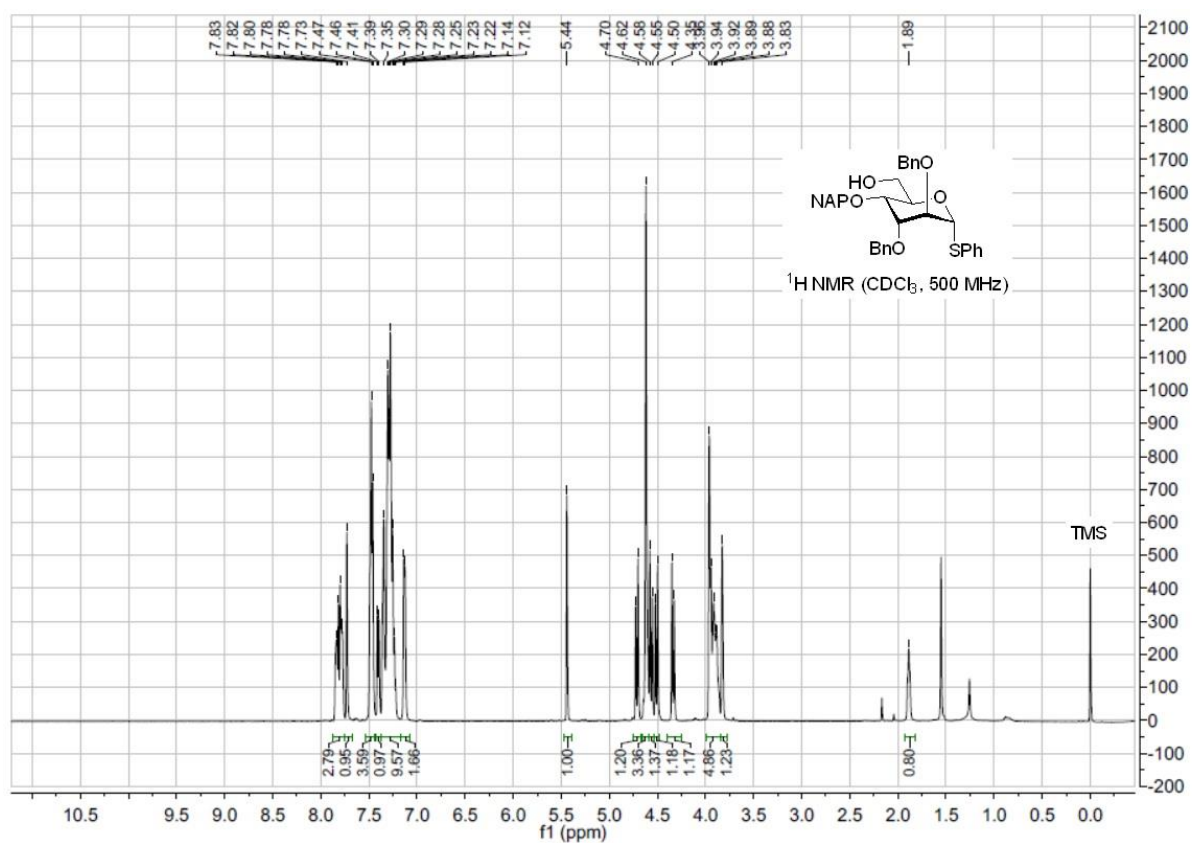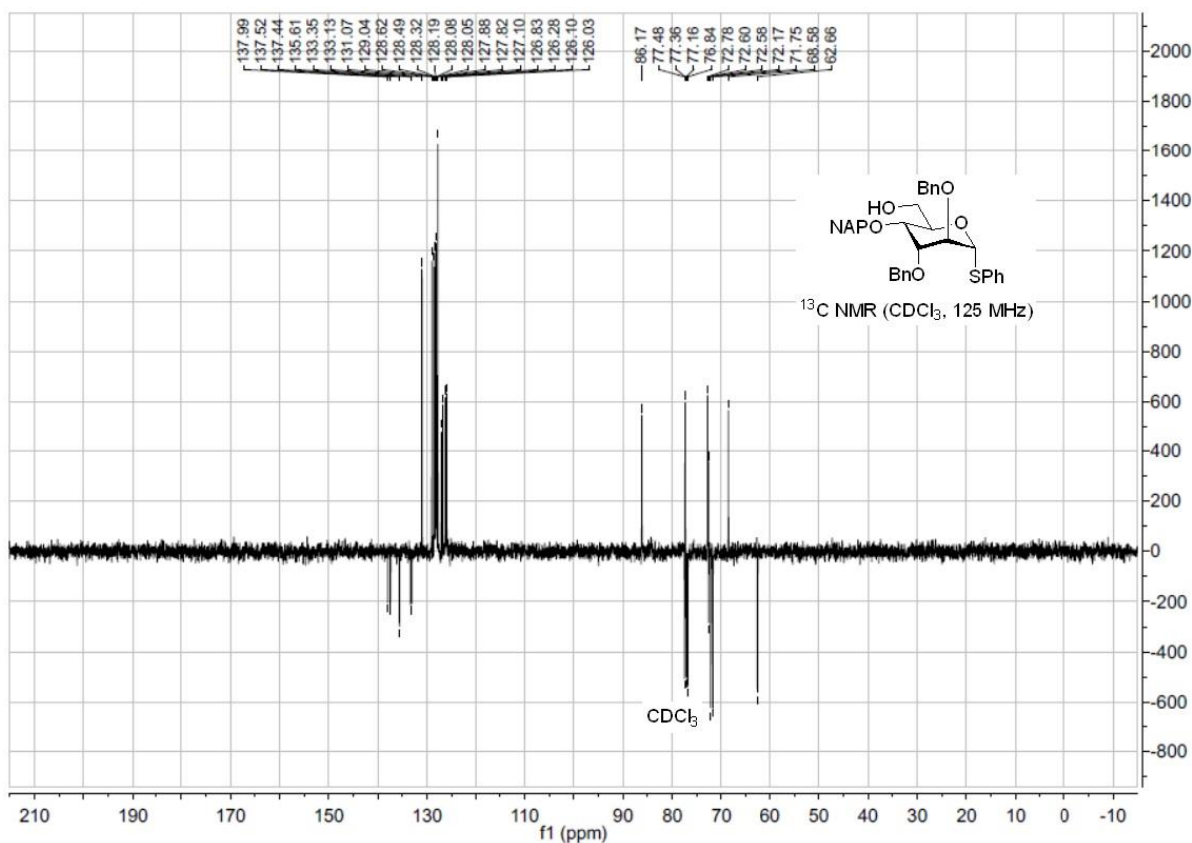

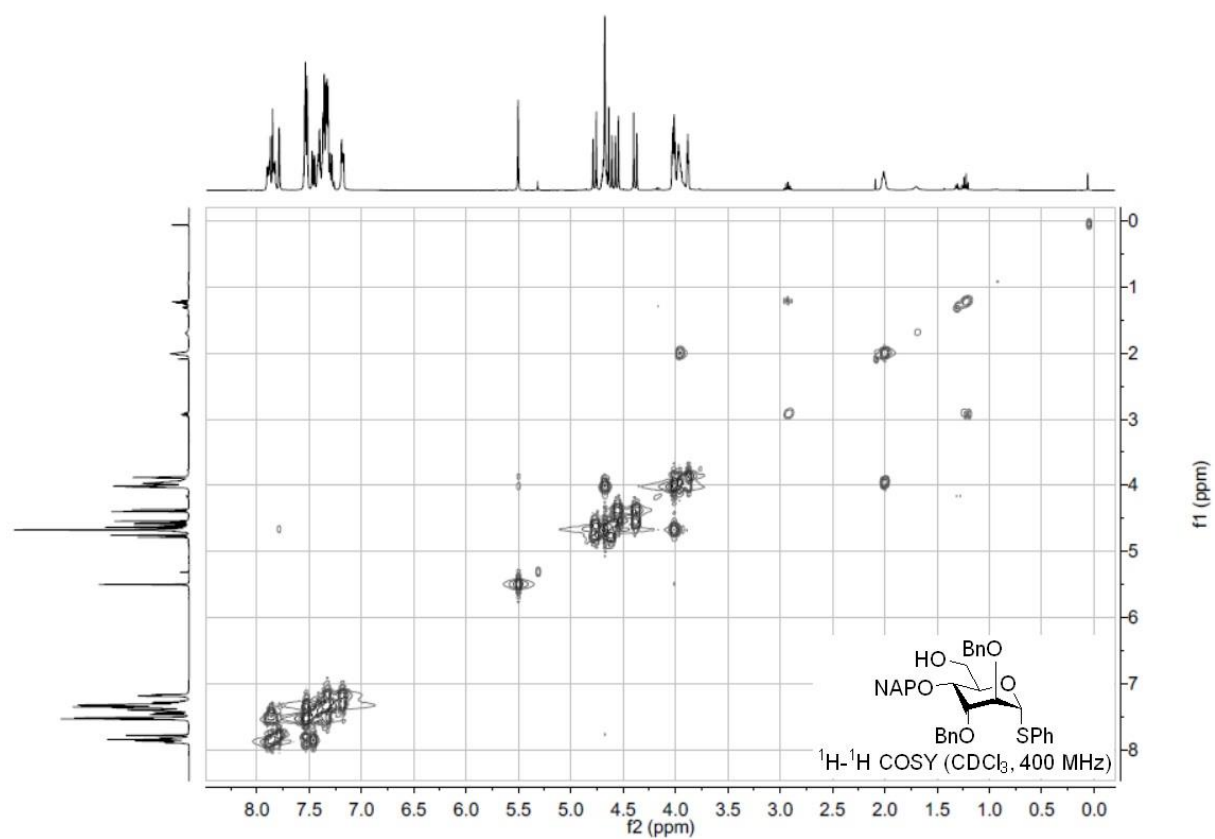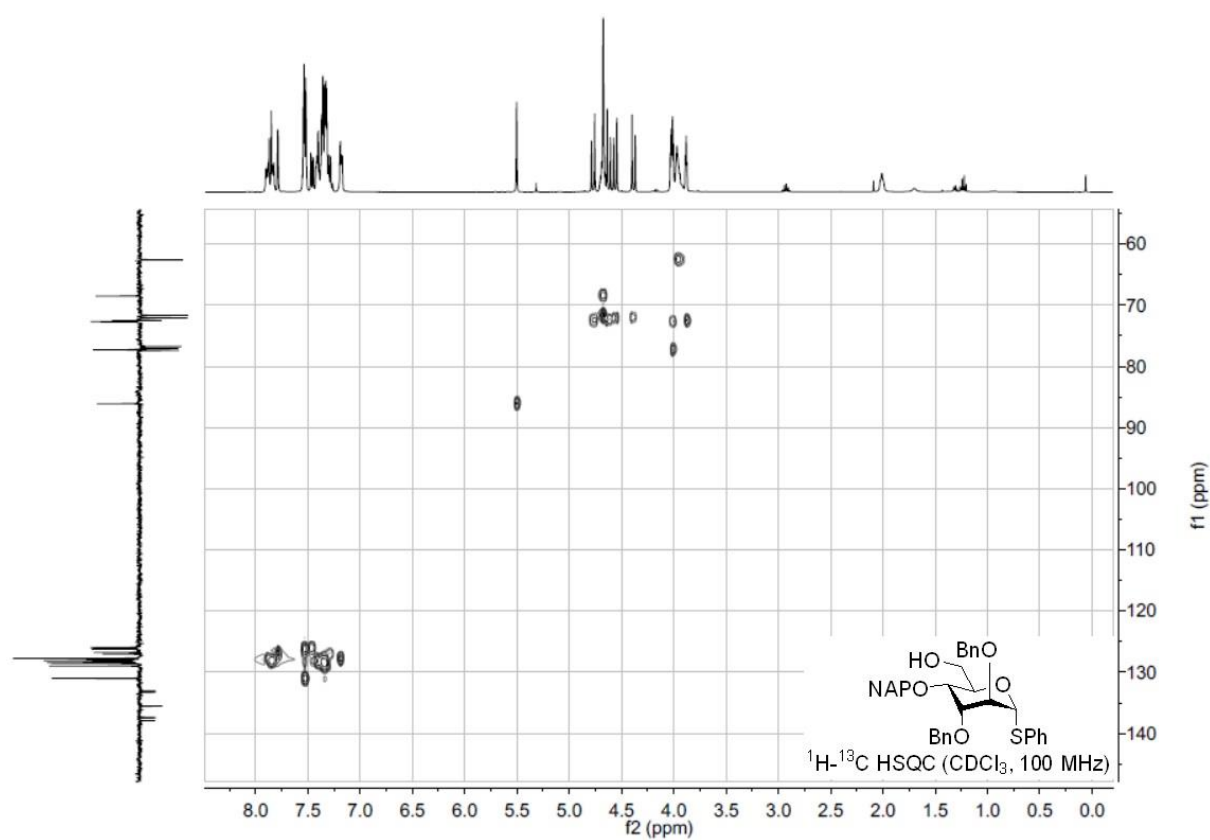



$^1\text{H}$  and  $^{13}\text{C}$  NMR spectra of compound **71**

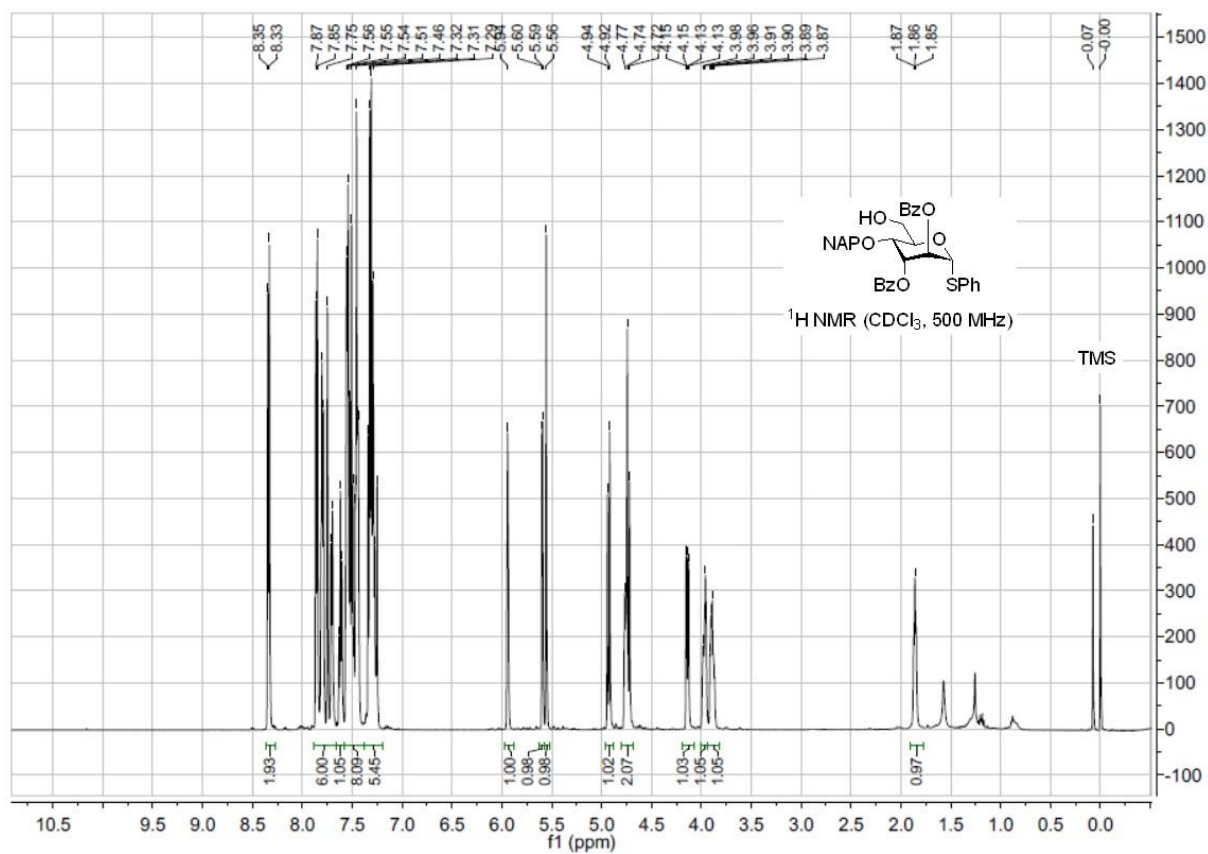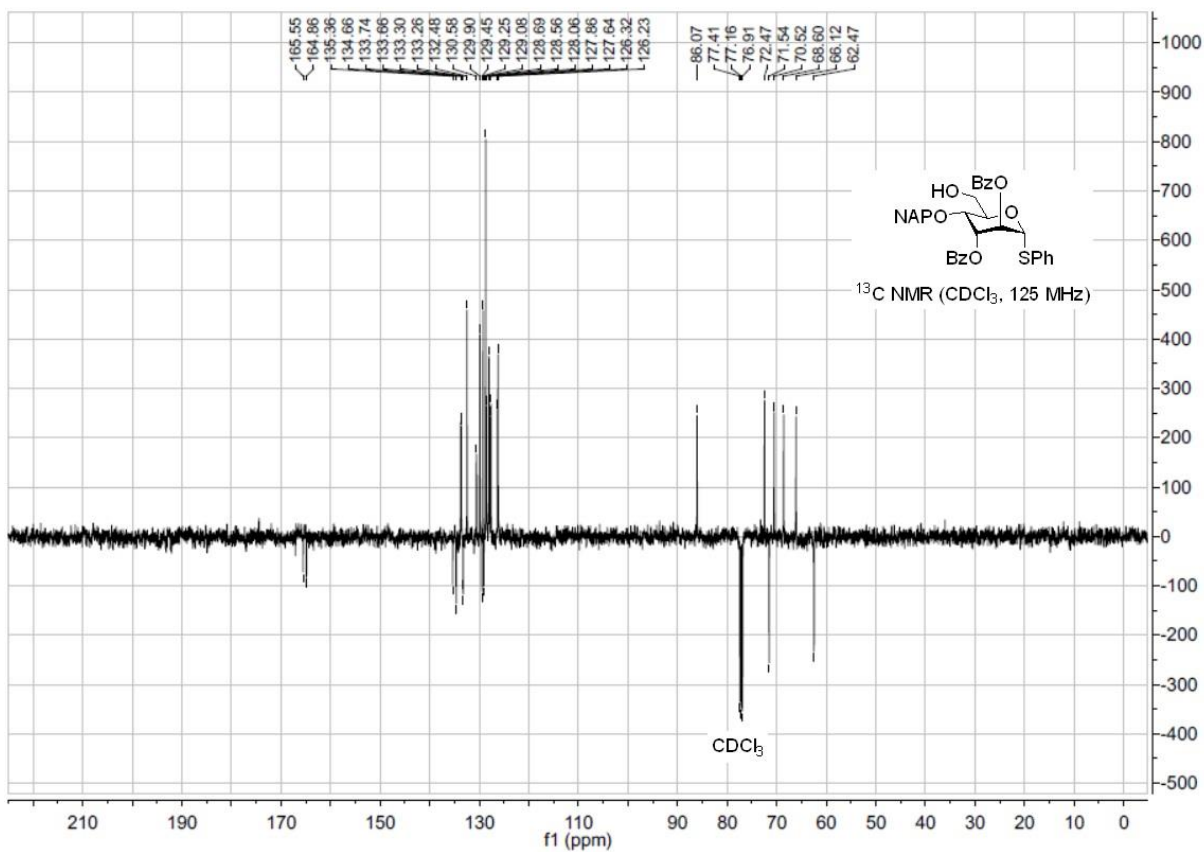

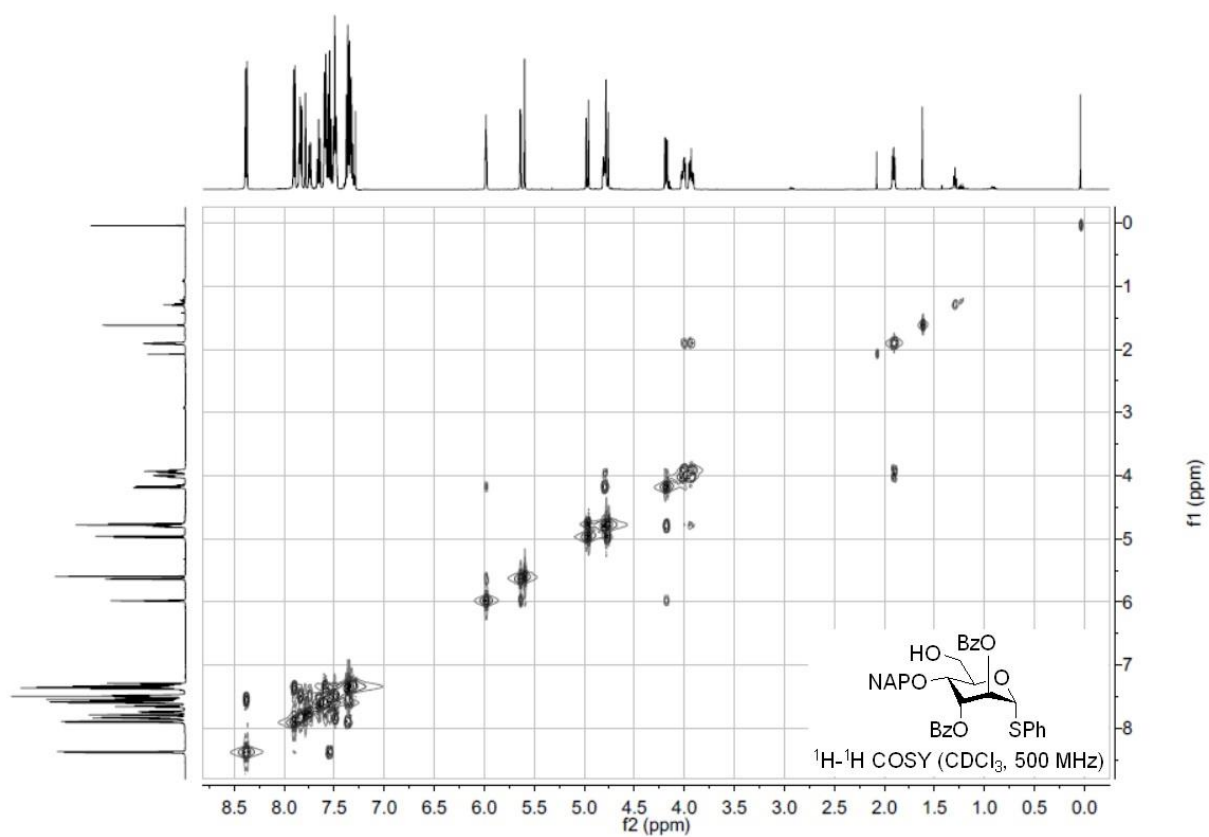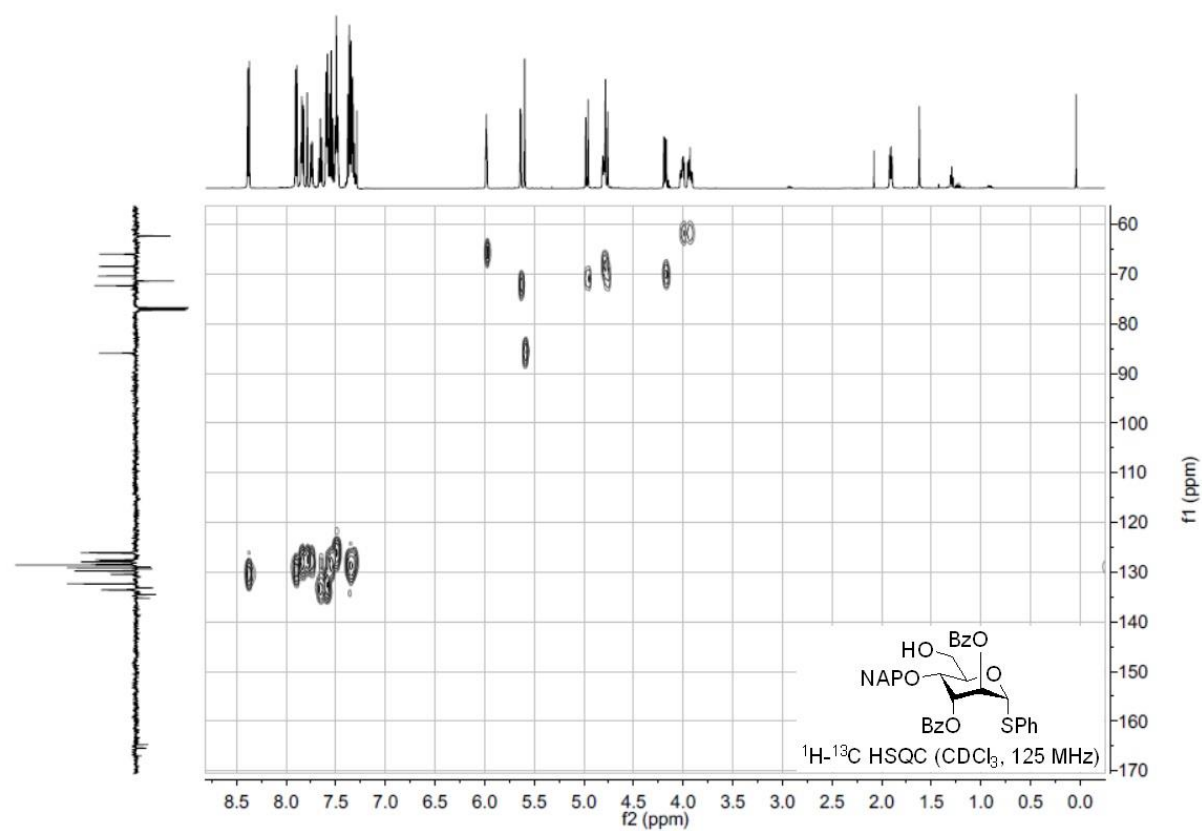

$^1\text{H}$  and  $^{13}\text{C}$  NMR spectra of compound 72

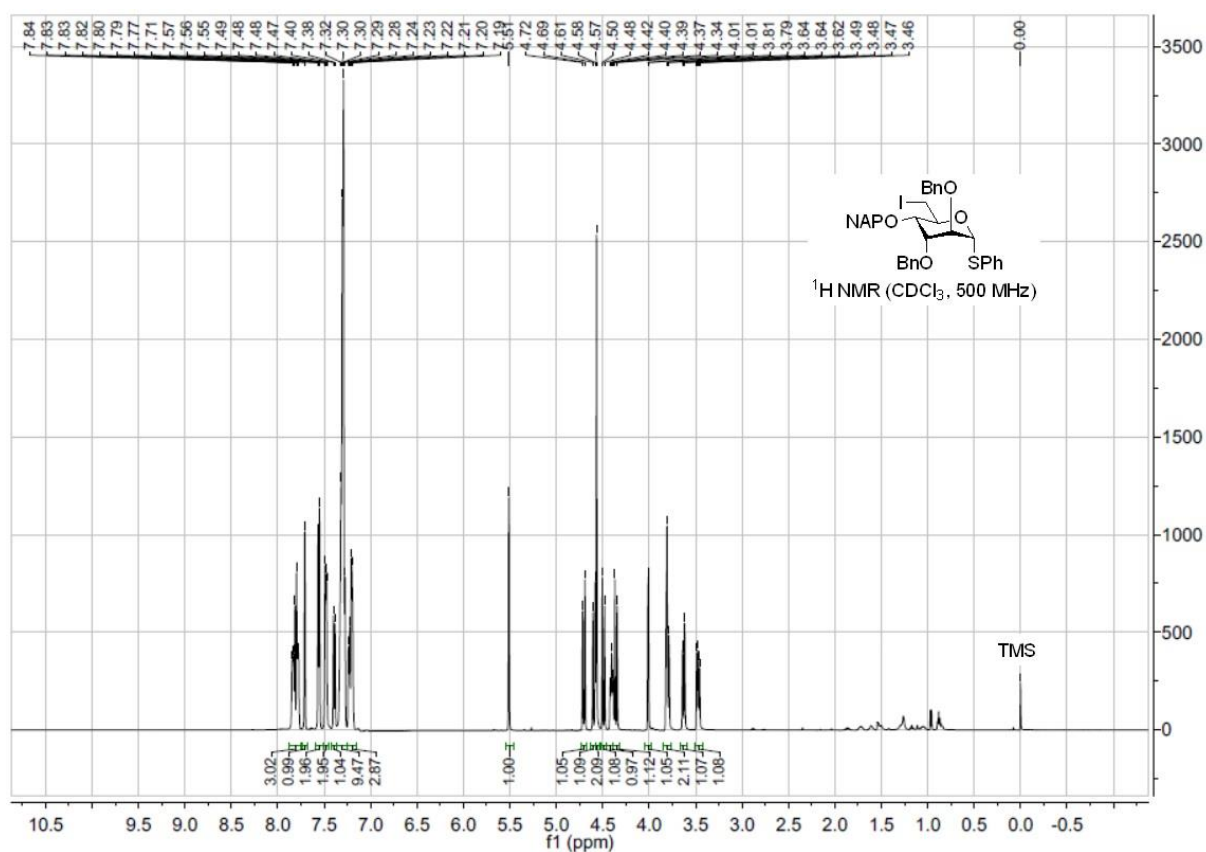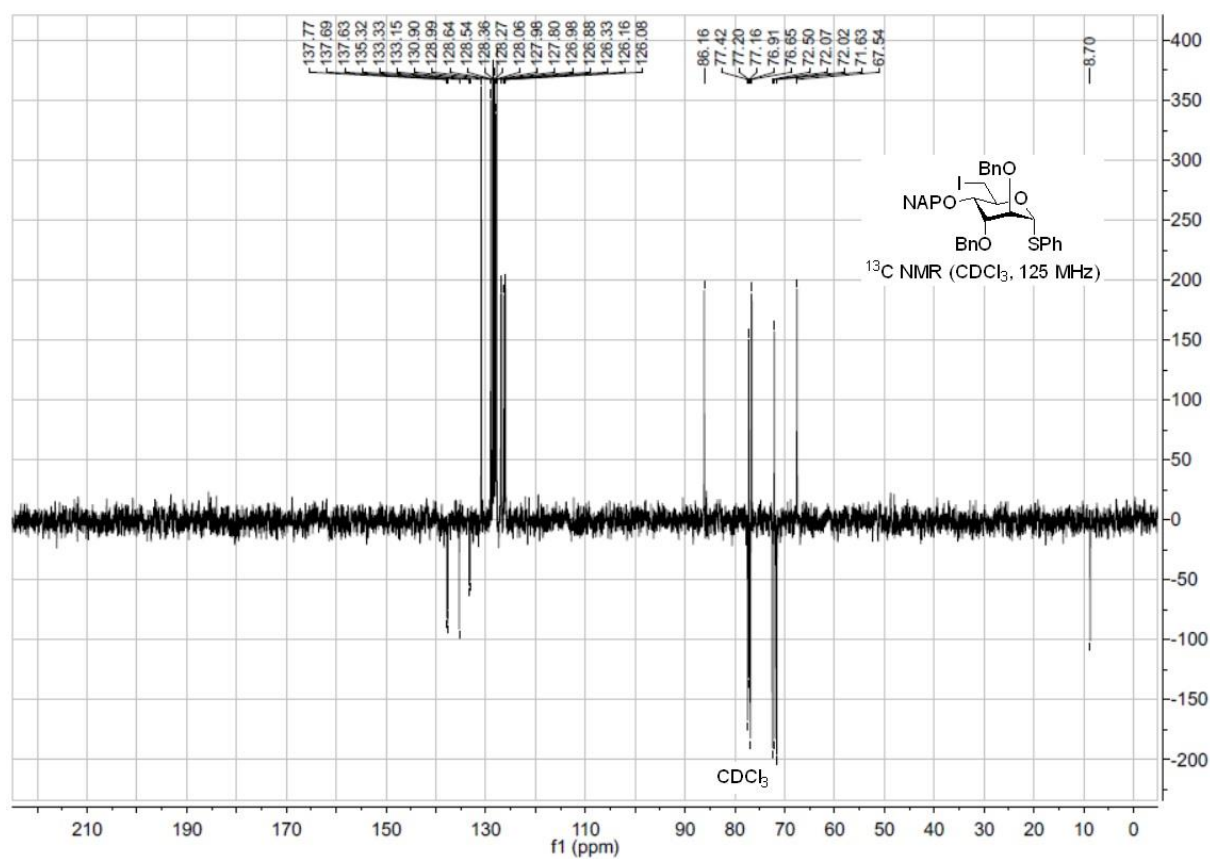

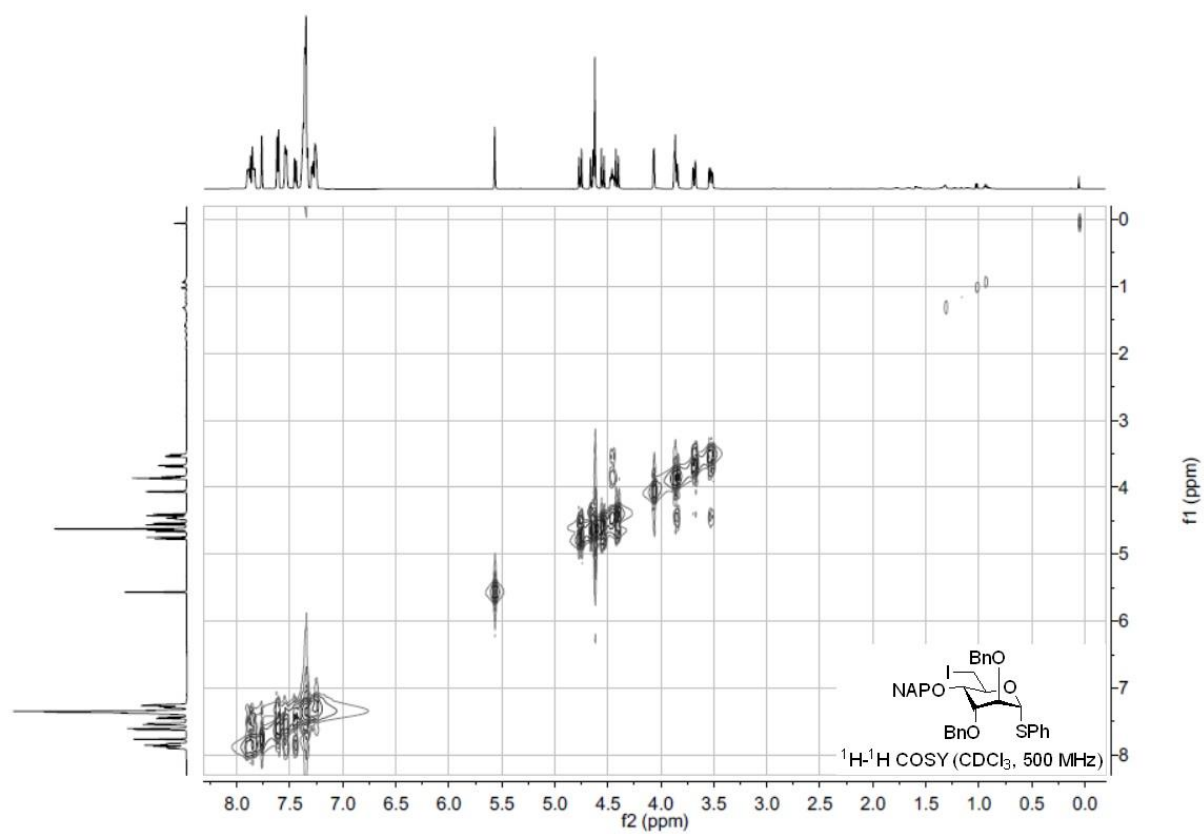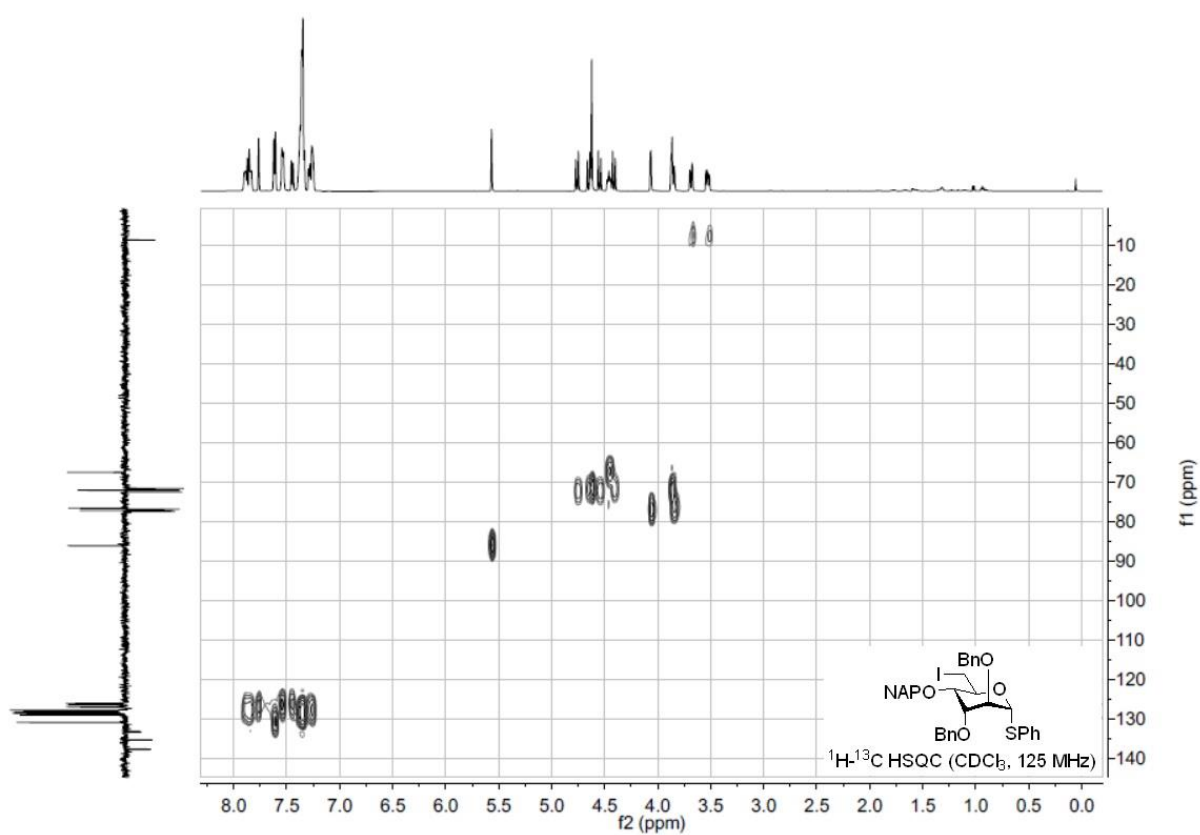

$^1\text{H}$  and  $^{13}\text{C}$  NMR spectra of compound **73**

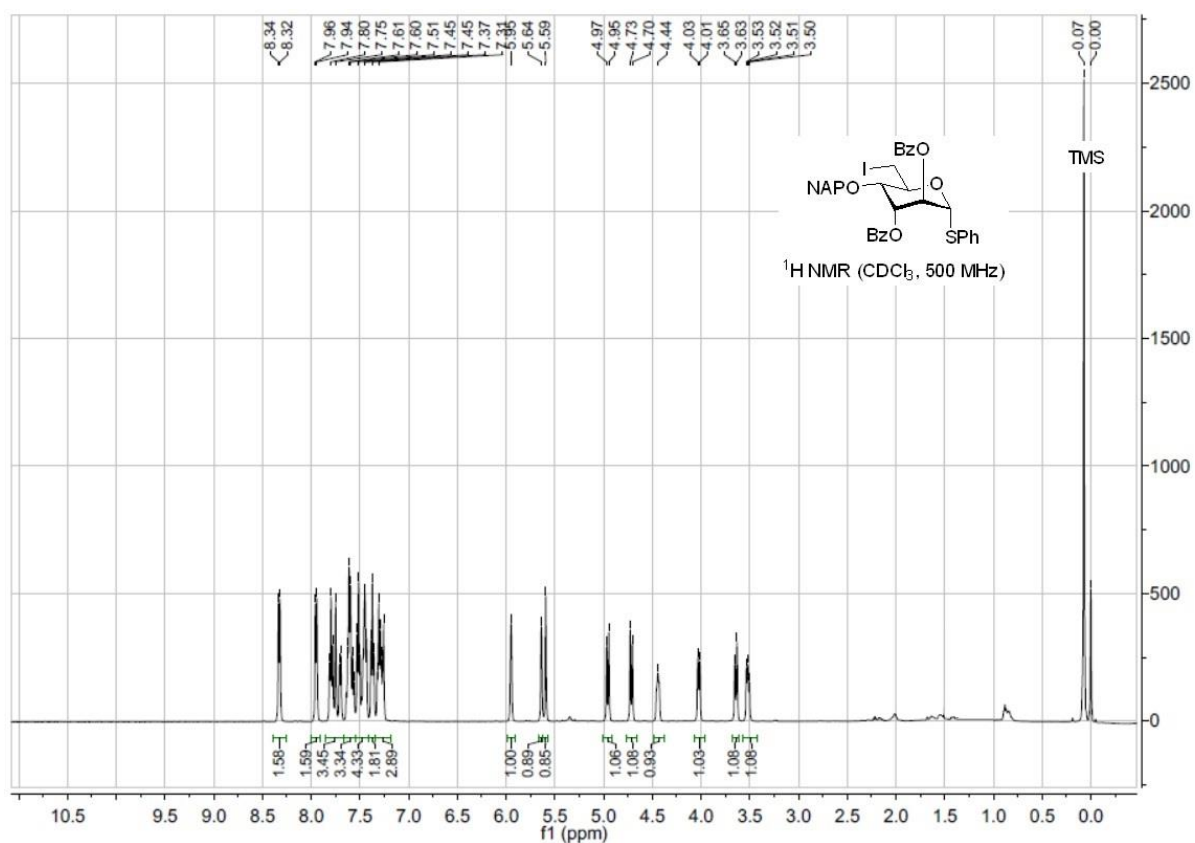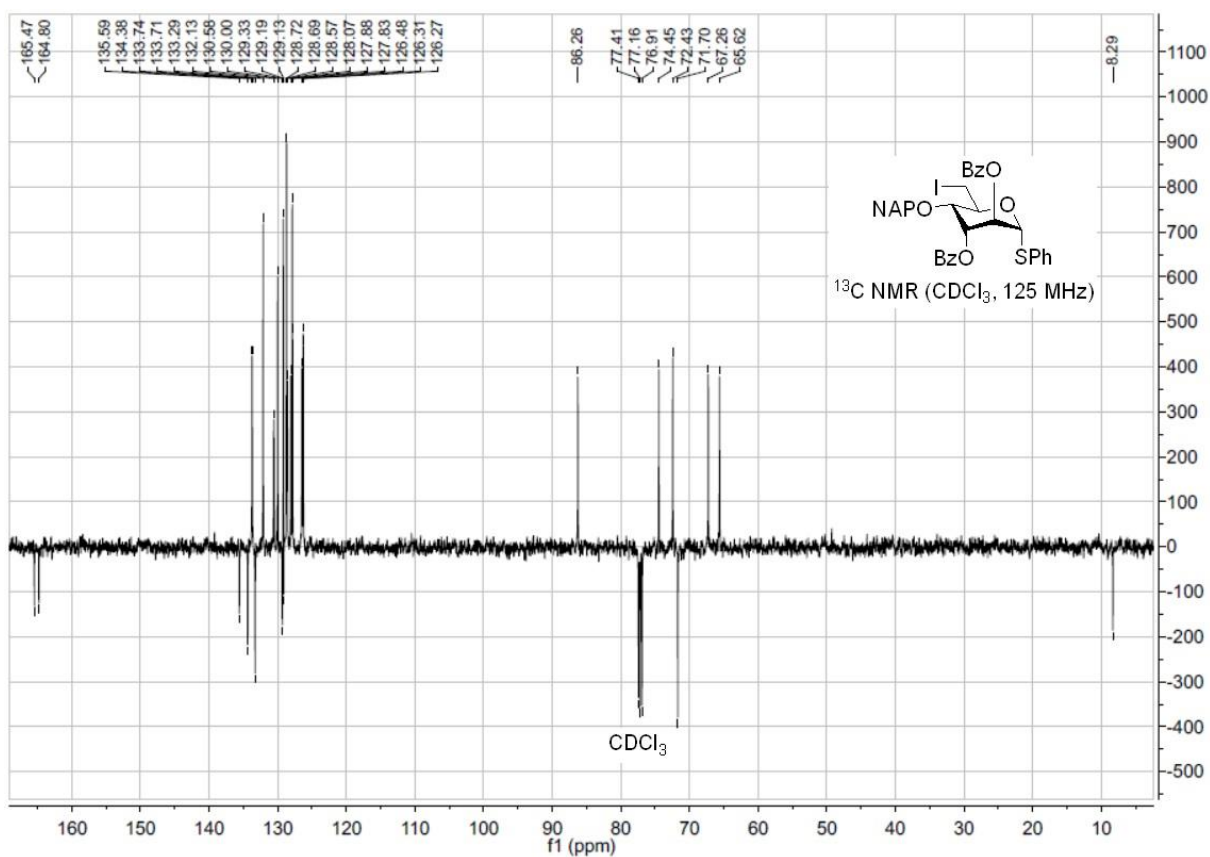

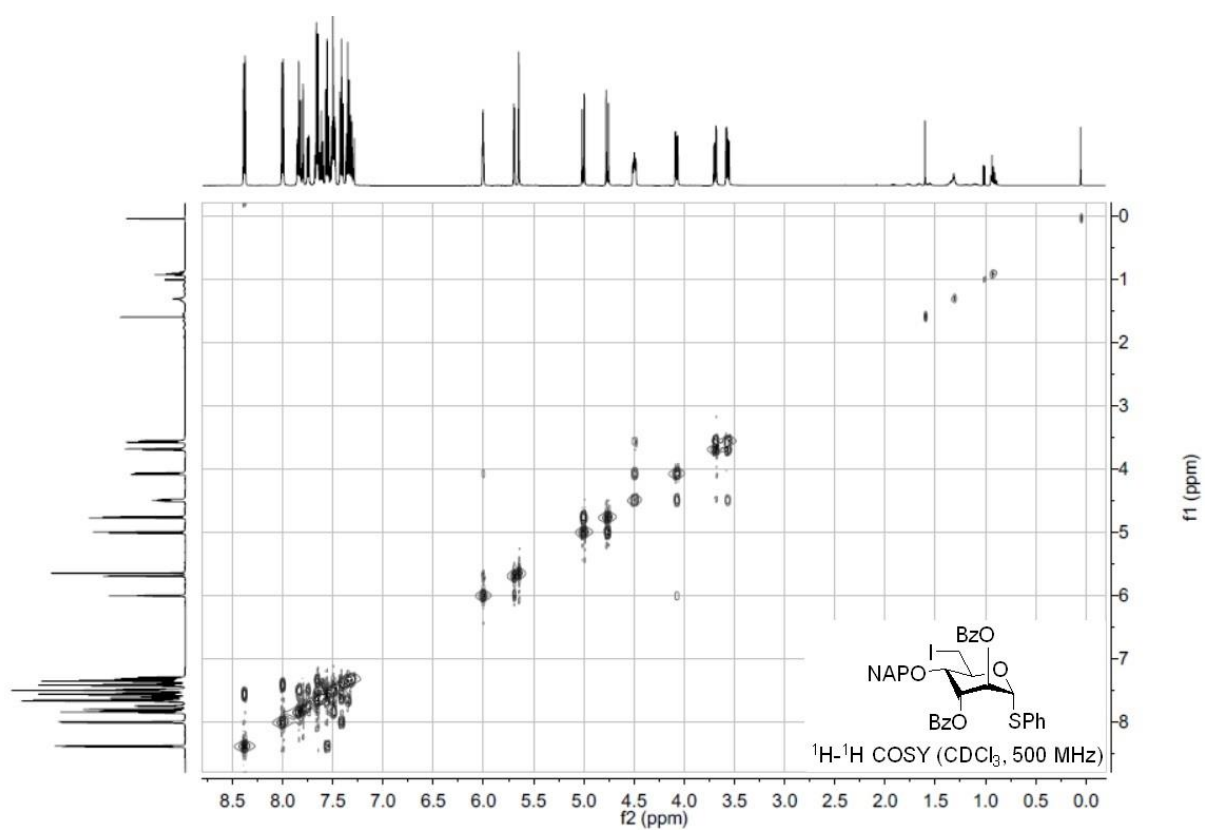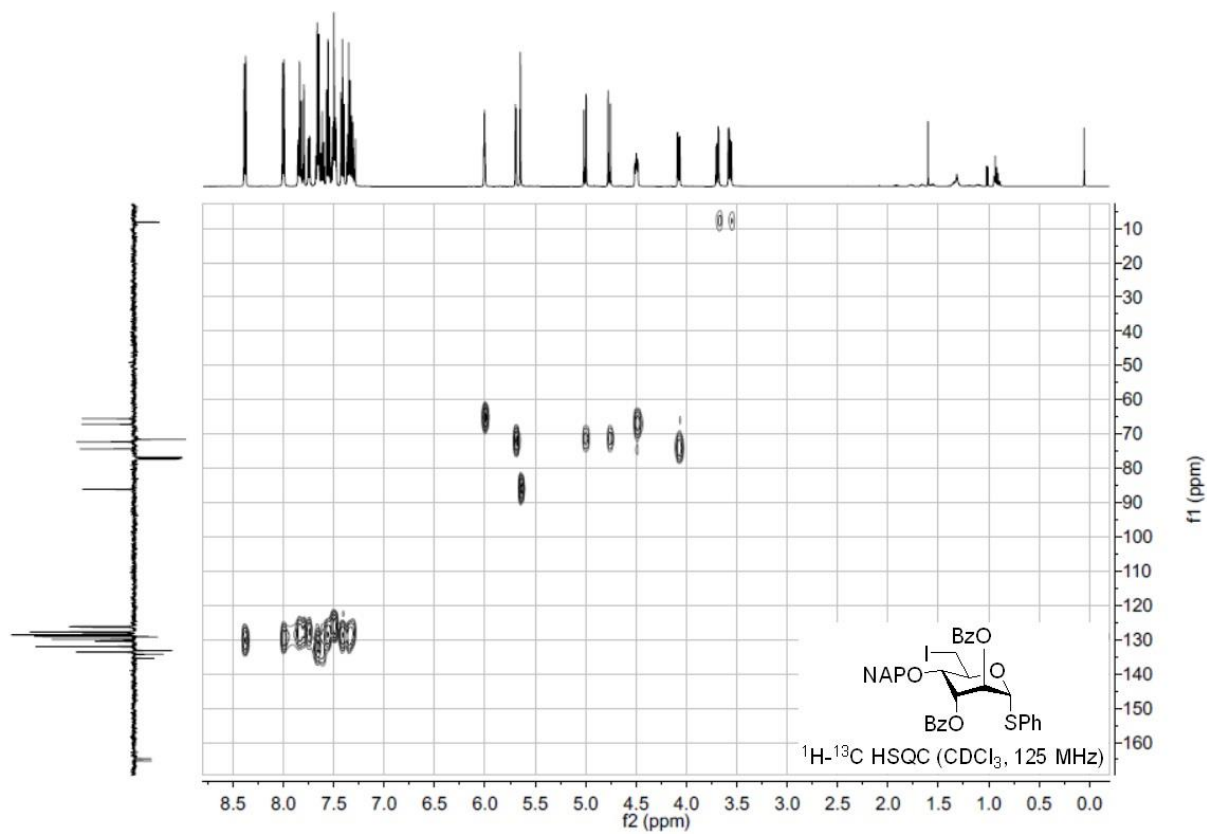

$^1\text{H}$  and  $^{13}\text{C}$  NMR spectra of compound 74

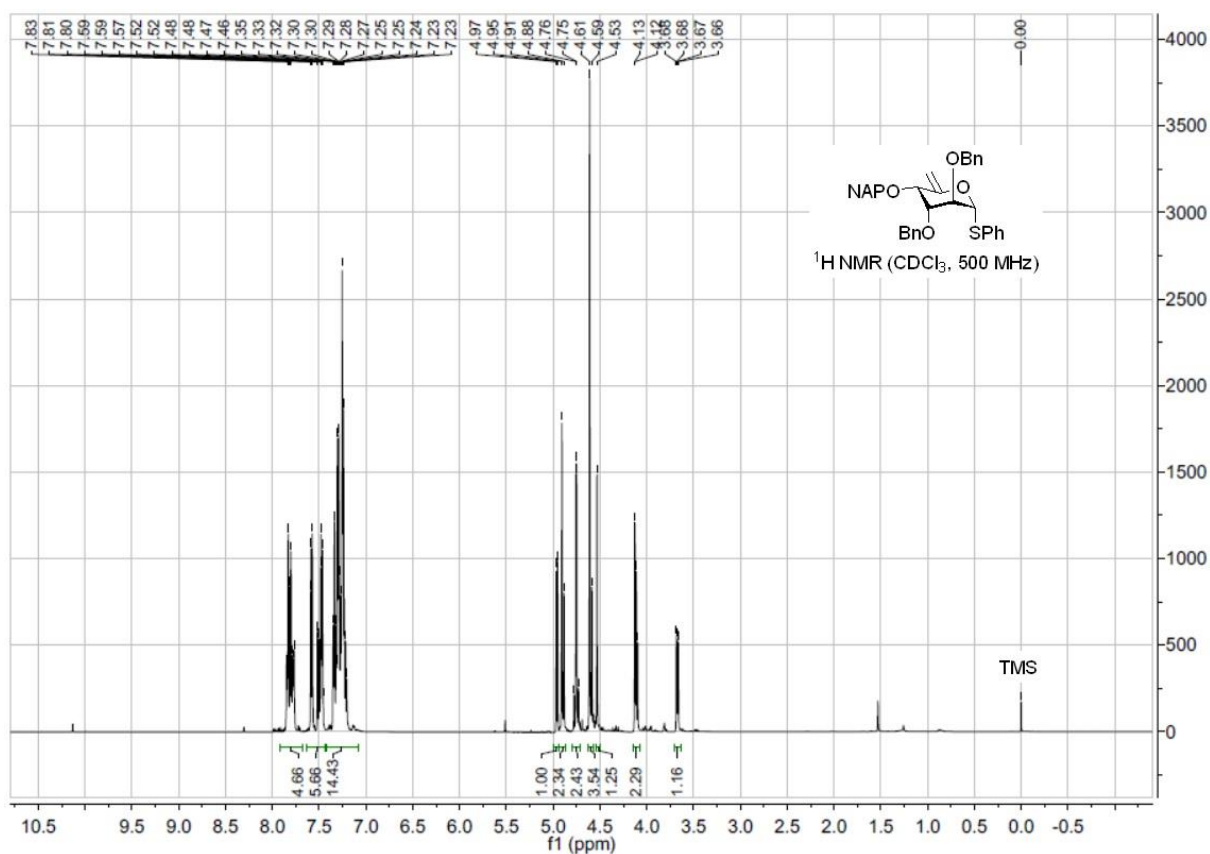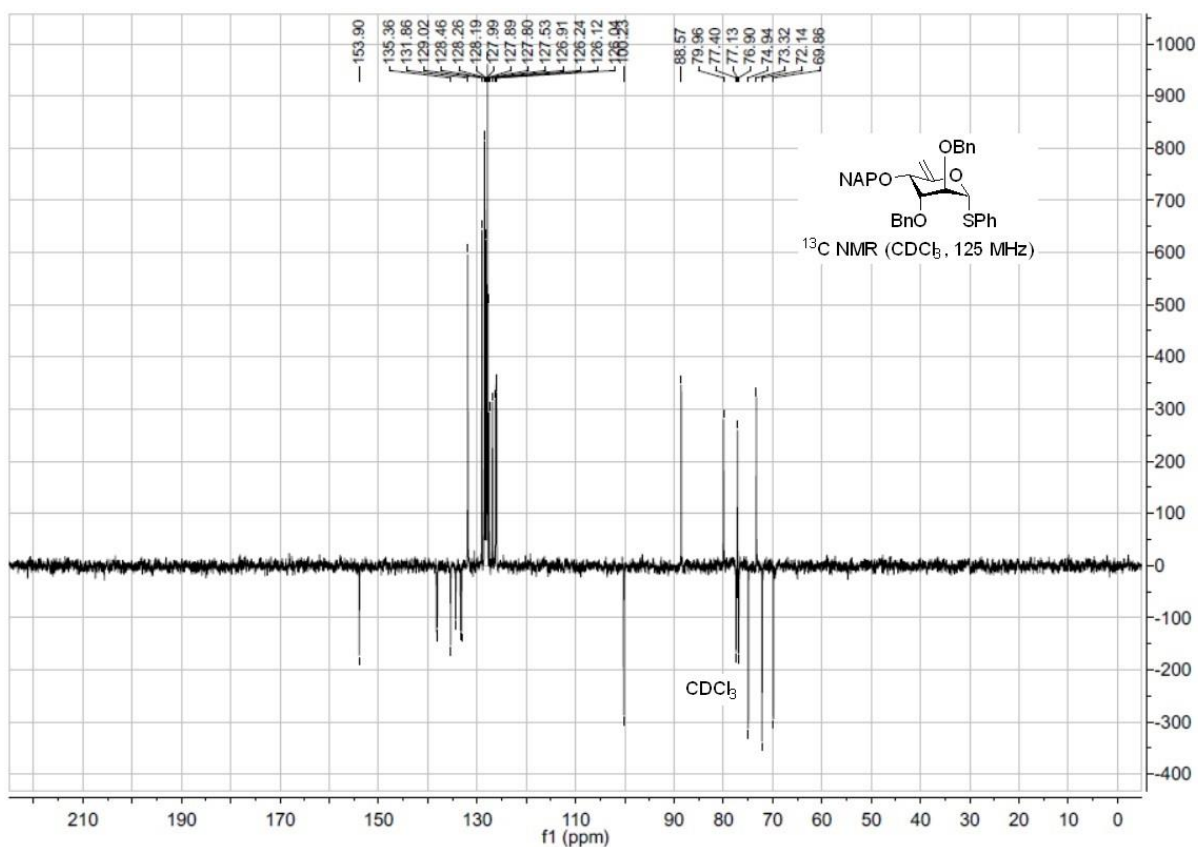



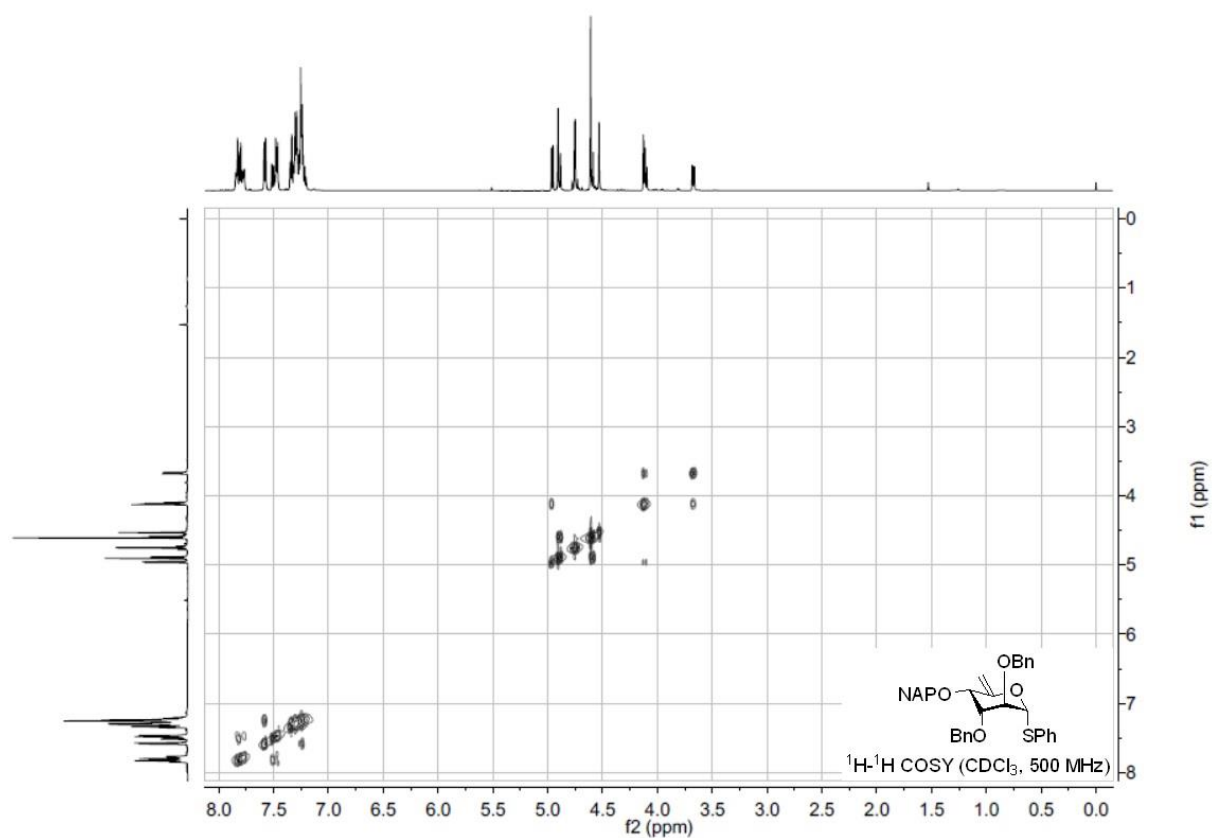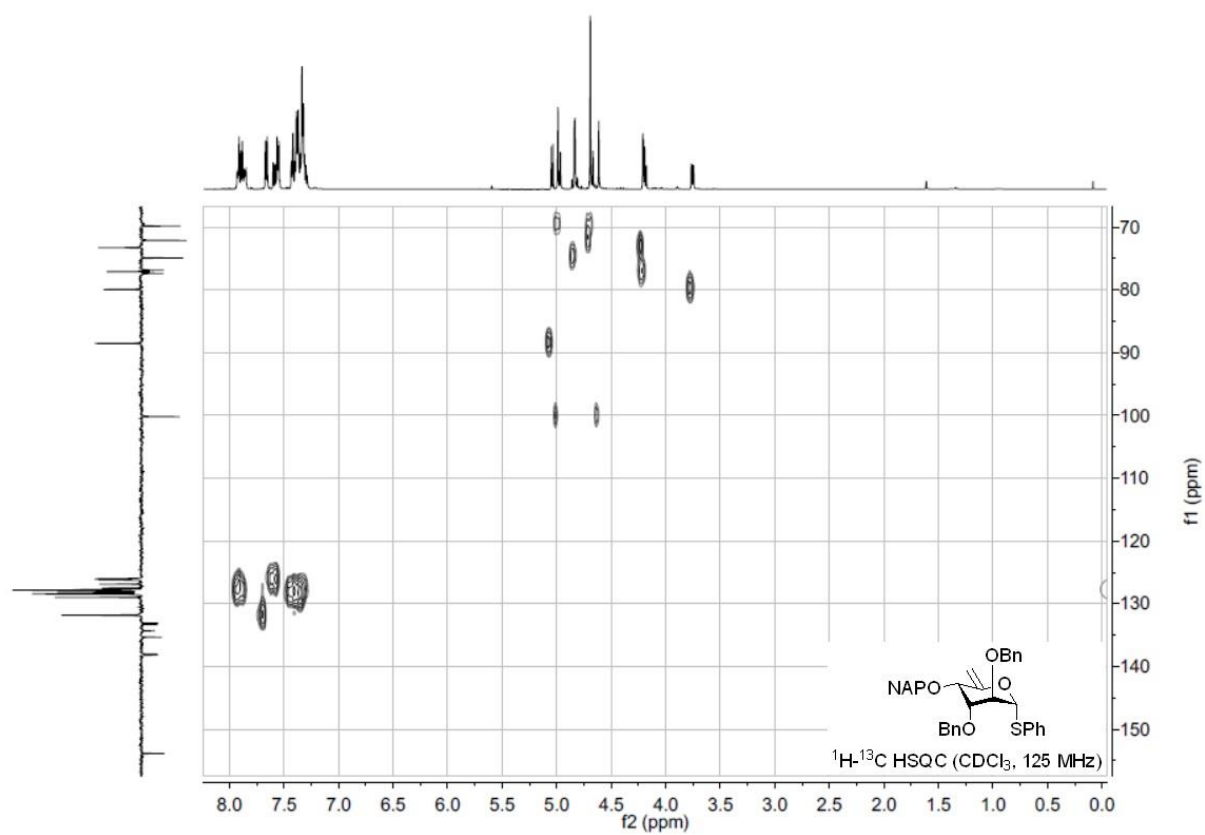

$^1\text{H}$  and  $^{13}\text{C}$  NMR spectra of compound 75

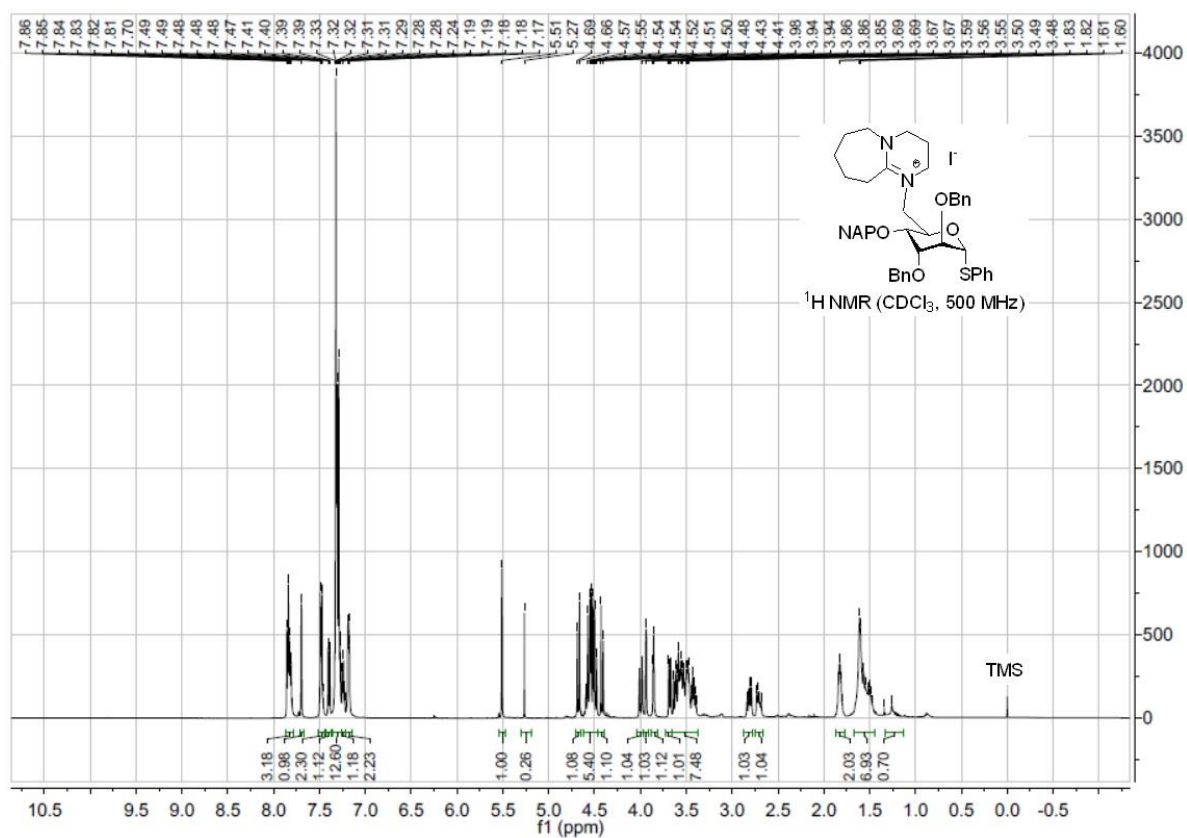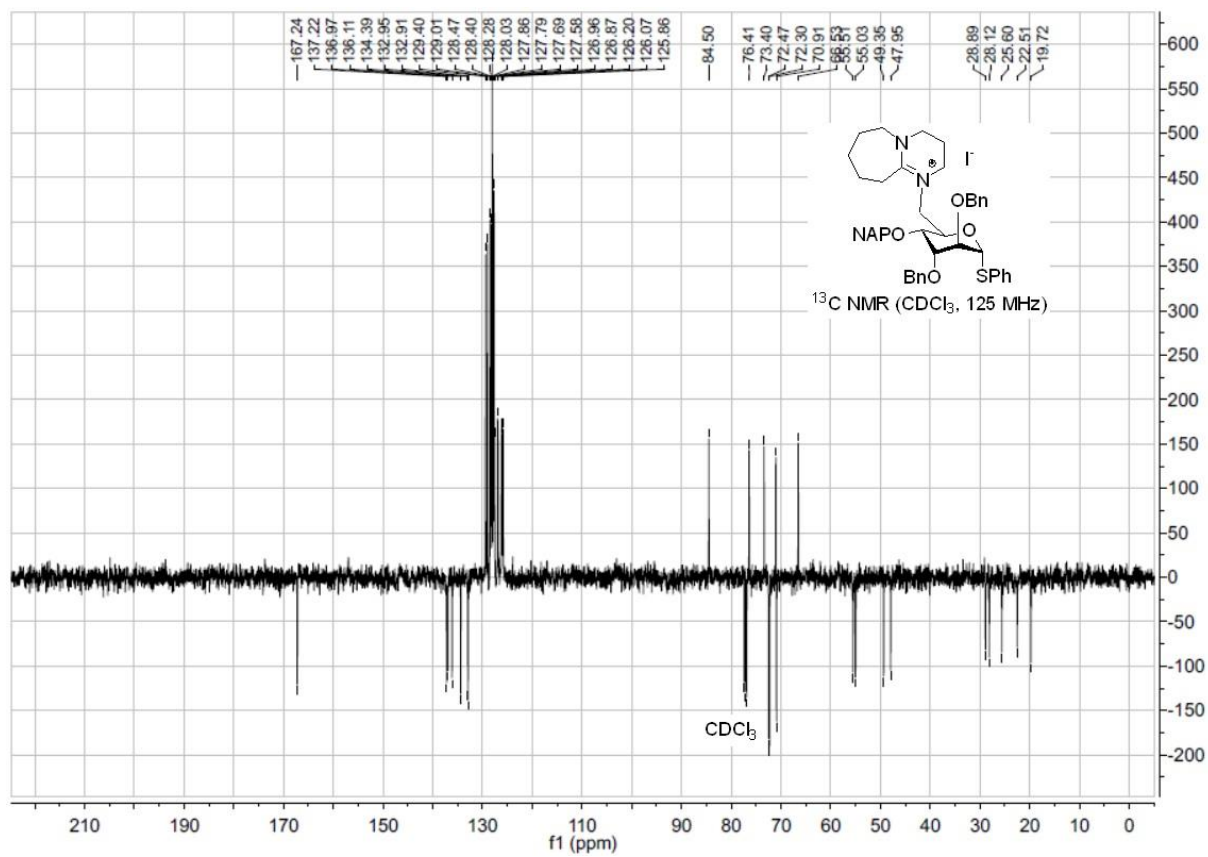

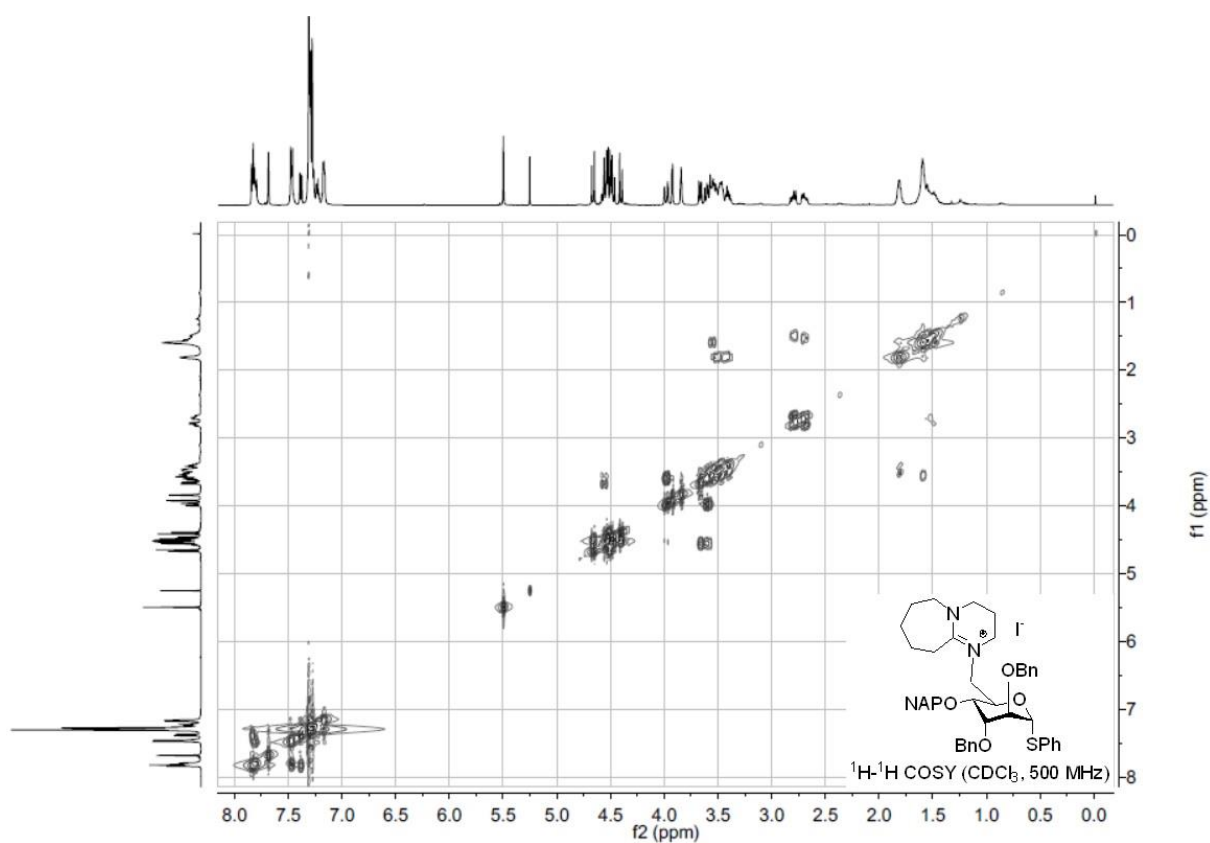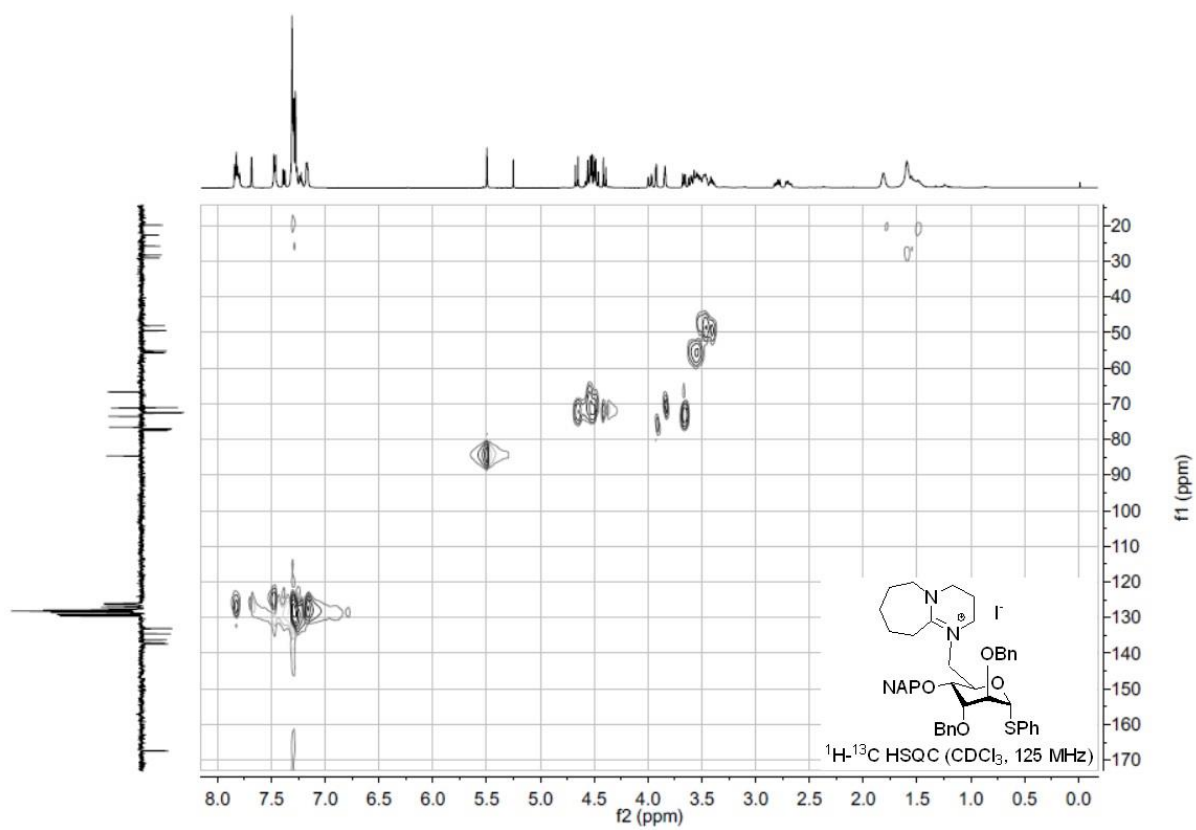

$^1\text{H}$  and  $^{13}\text{C}$  NMR spectra of compound 76

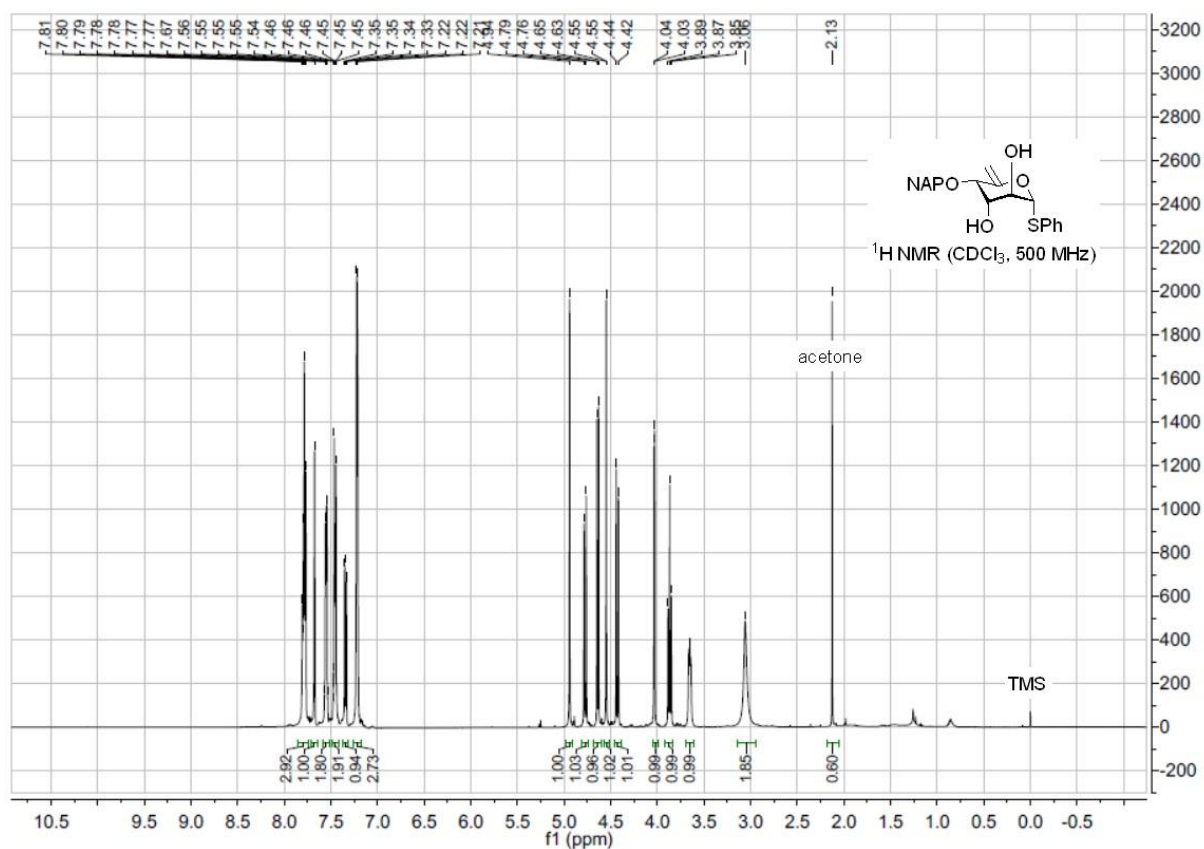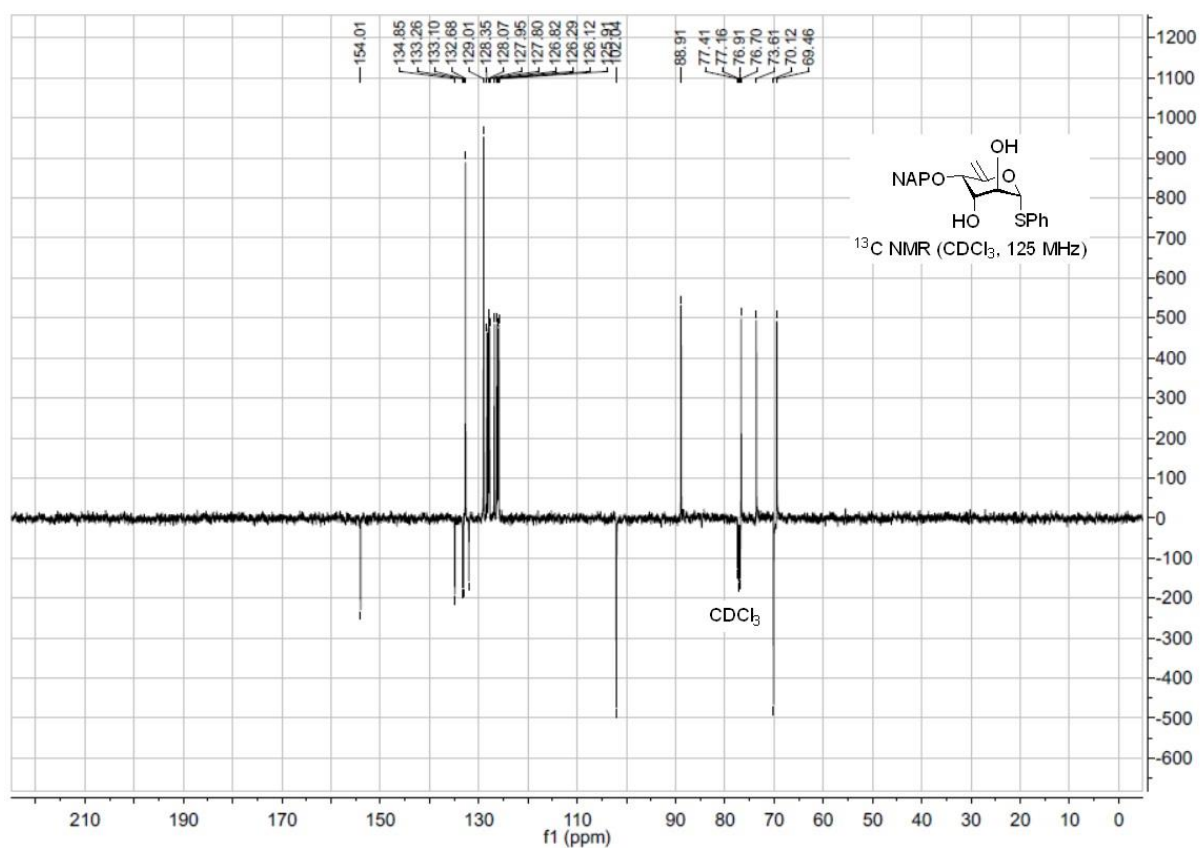

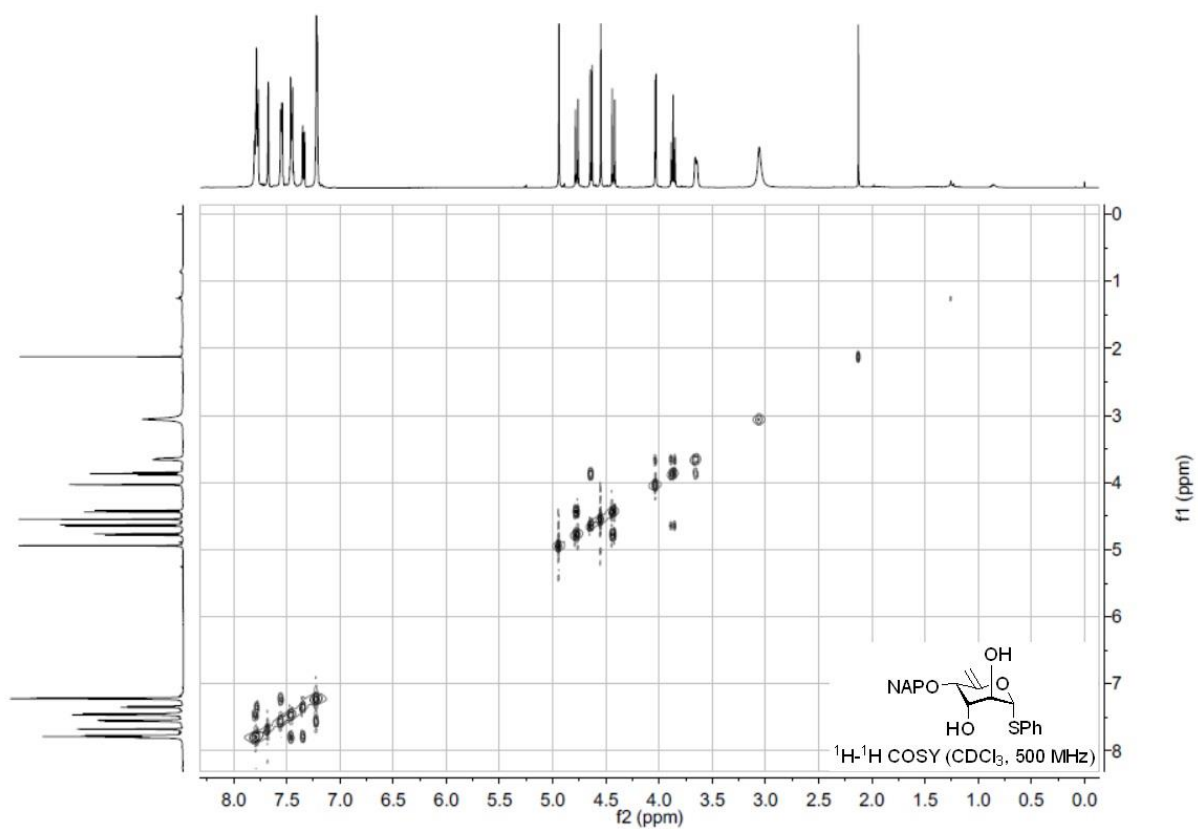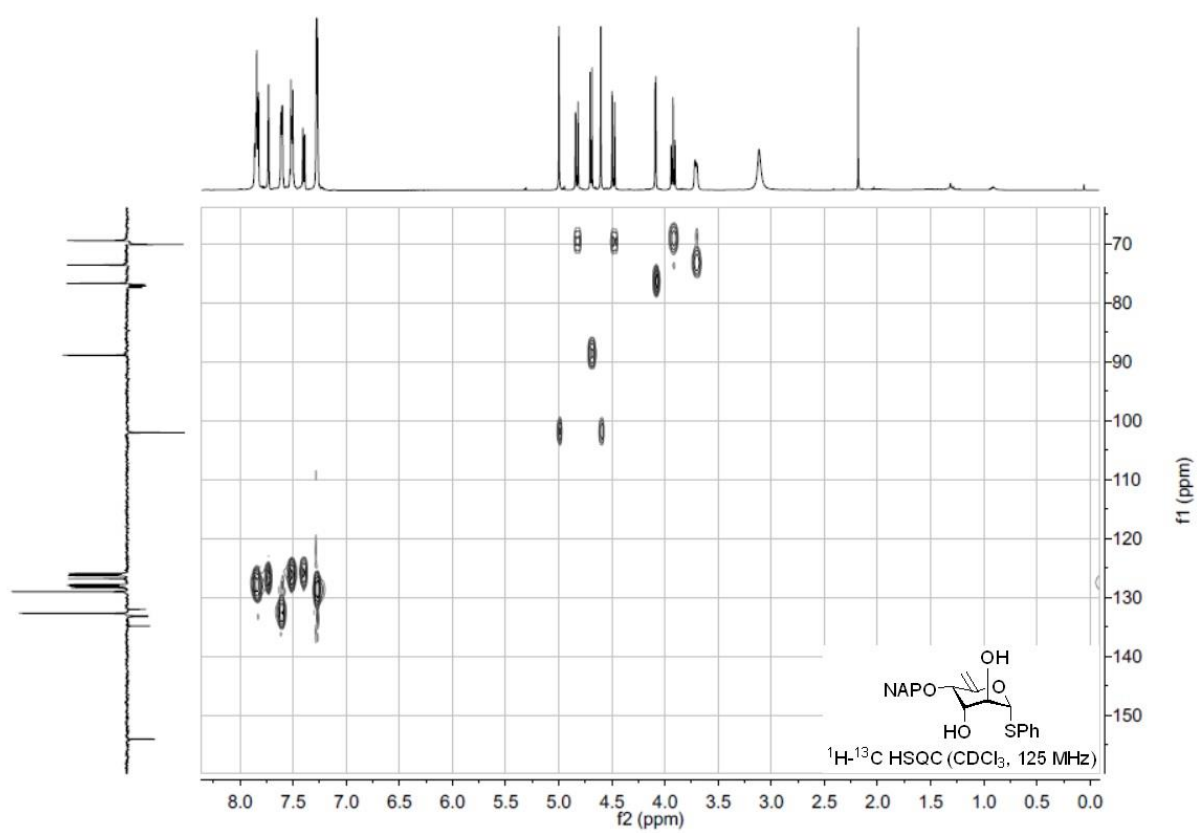

$^1\text{H}$  and  $^{13}\text{C}$  NMR spectra of compound 77

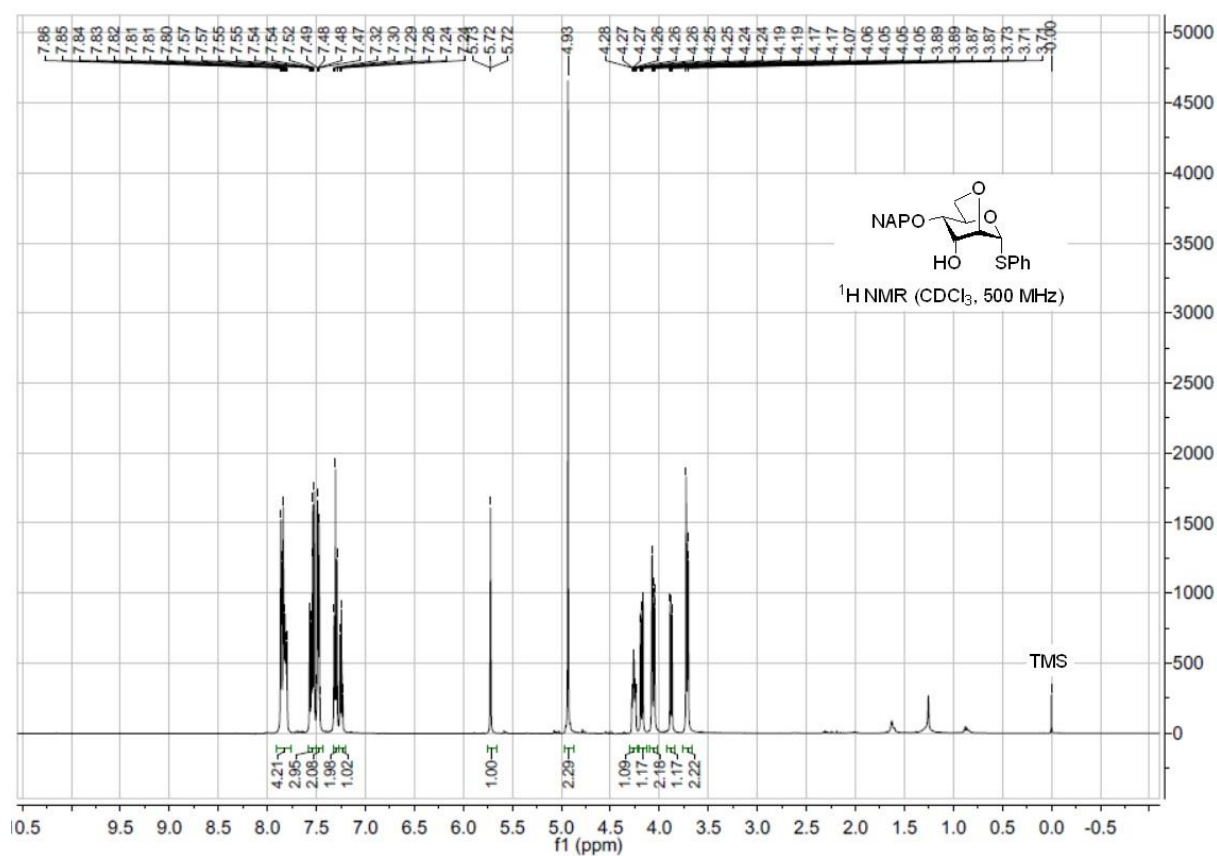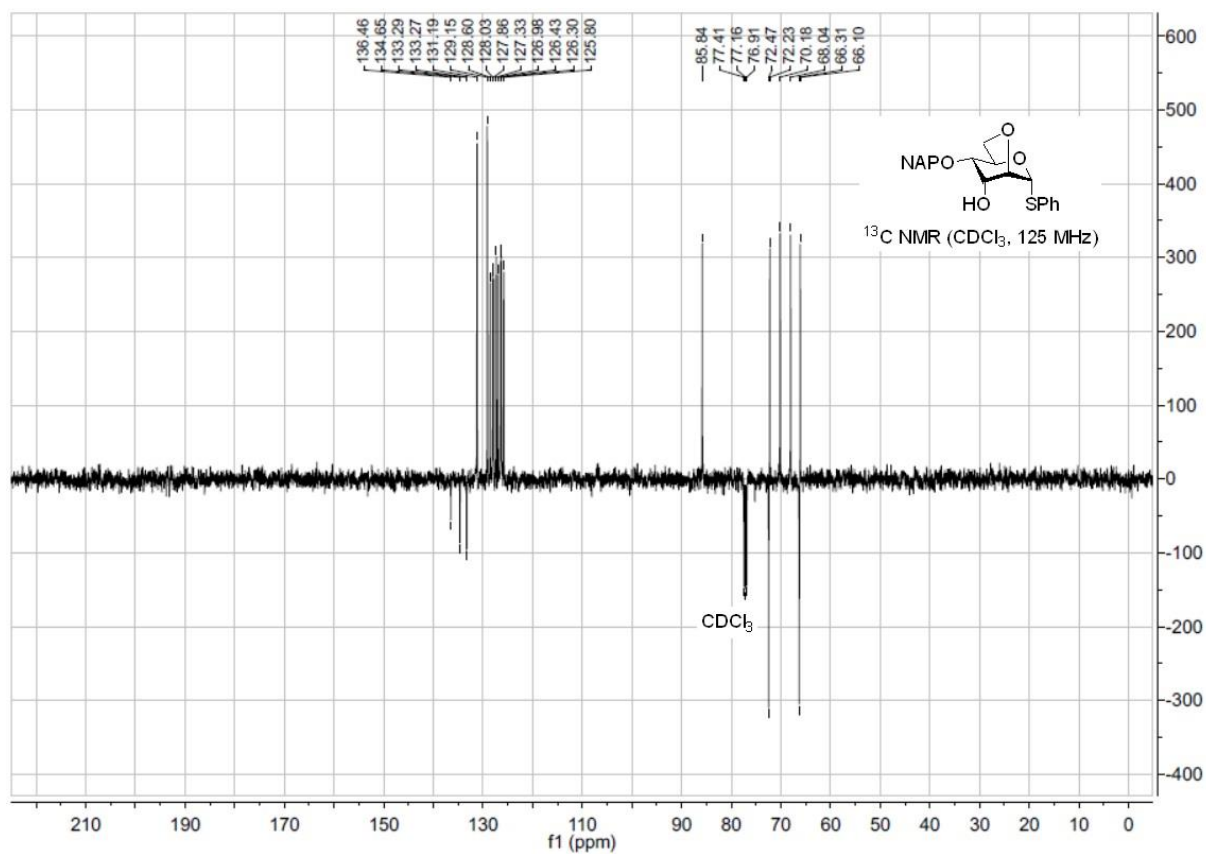

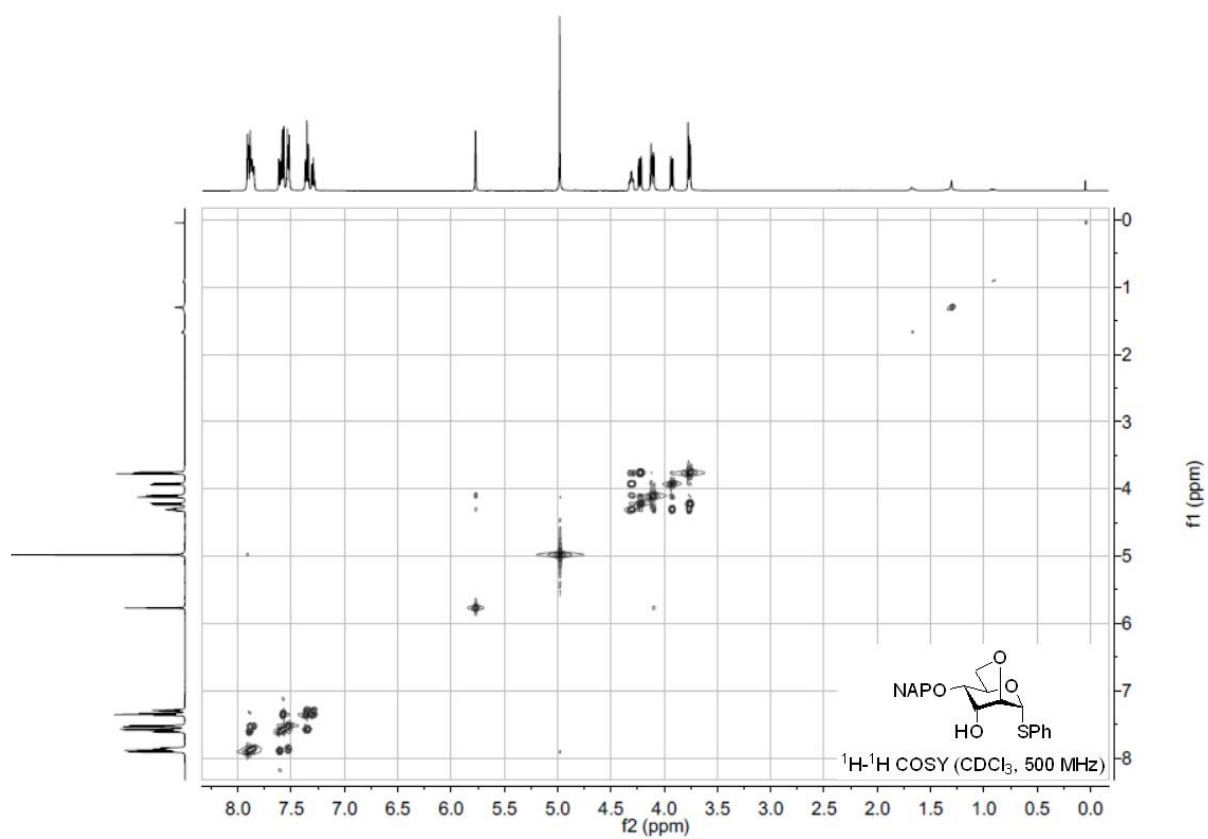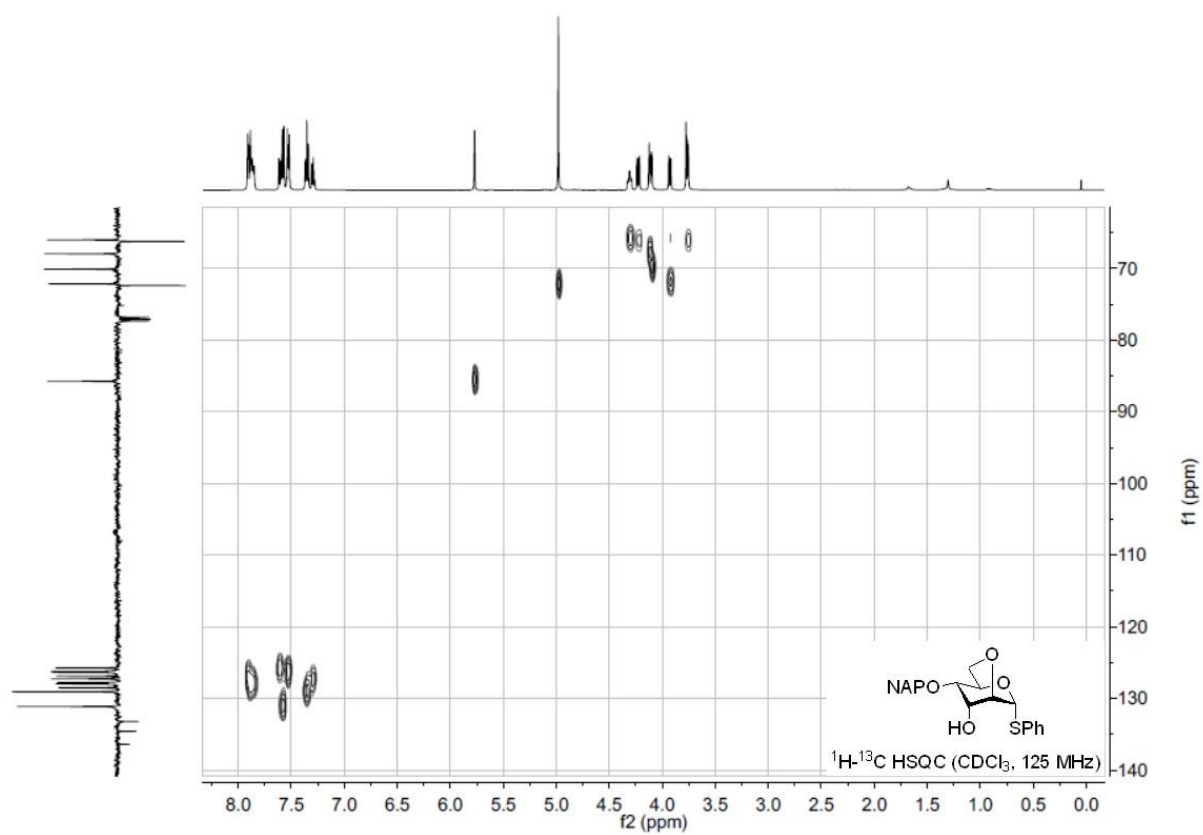



$^1\text{H}$  and  $^{13}\text{C}$  NMR spectra of compound 78

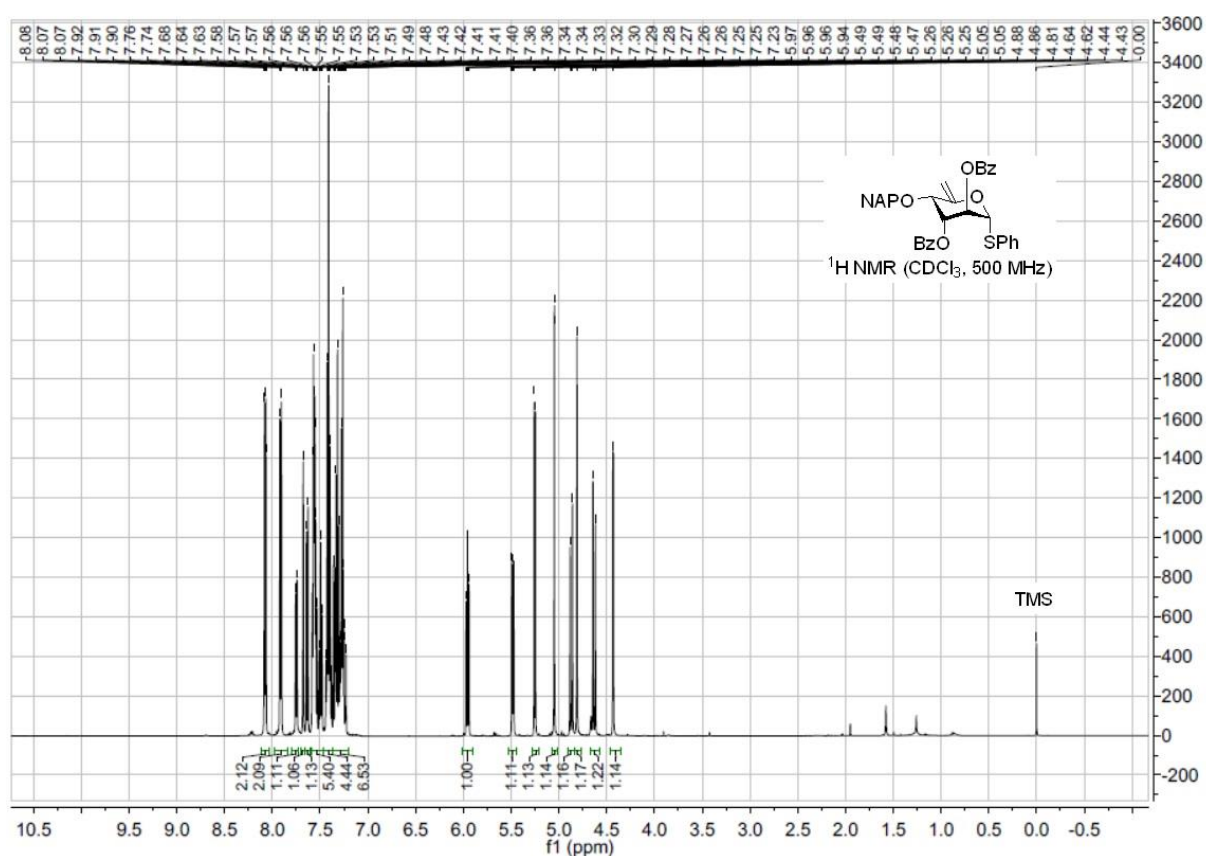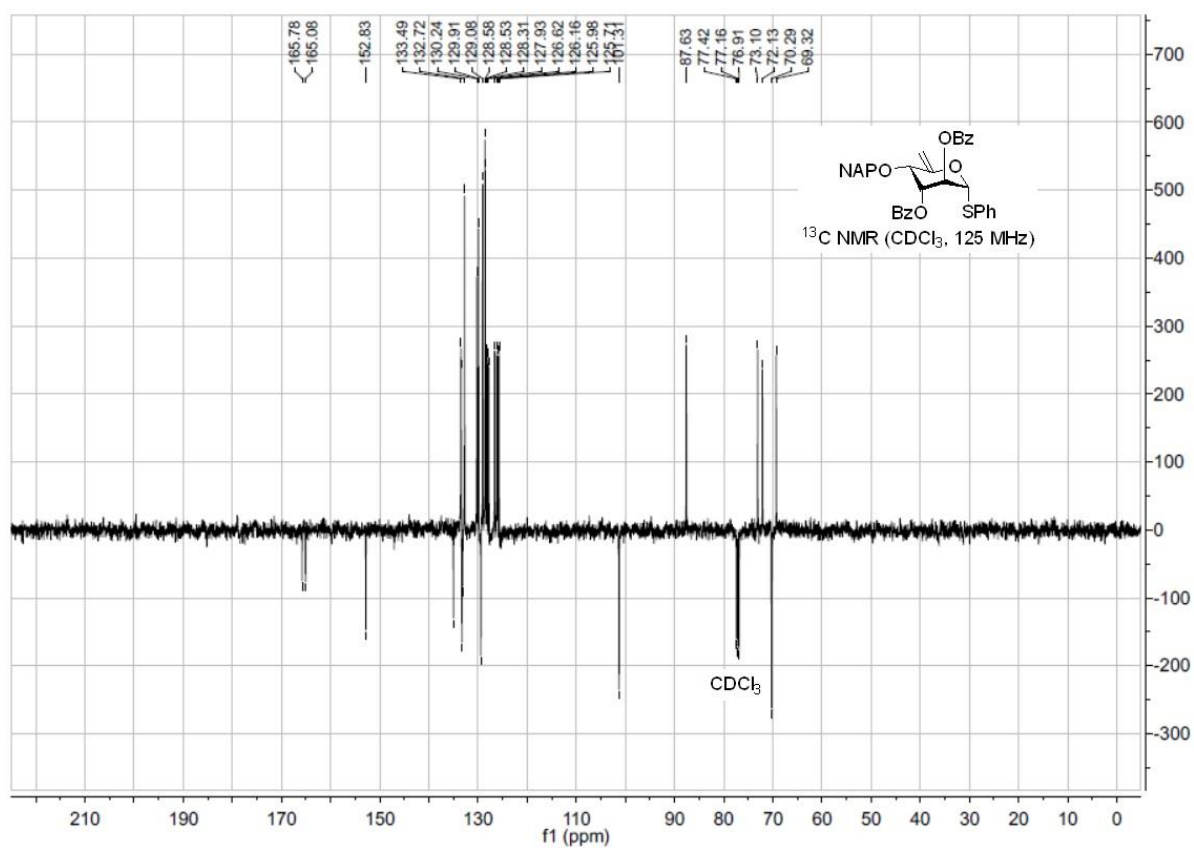

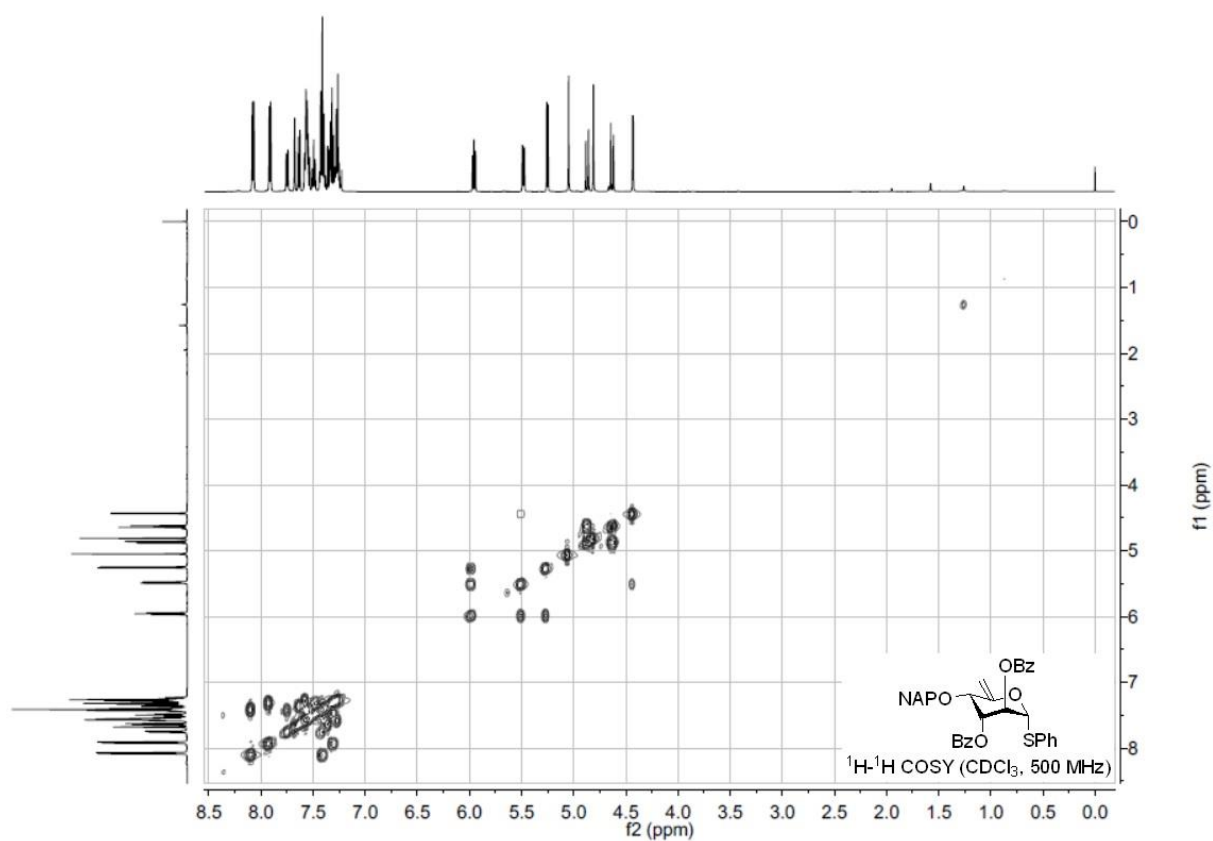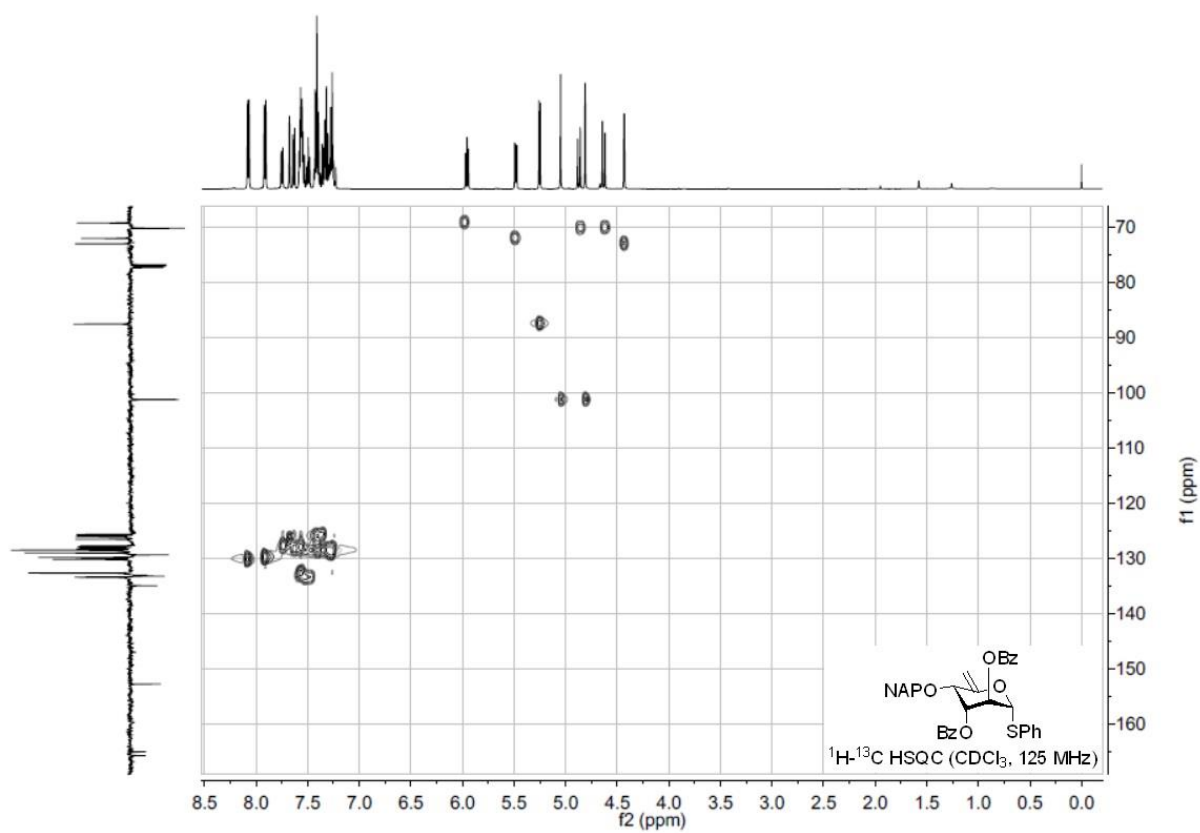

$^1\text{H}$  and  $^{13}\text{C}$  NMR spectra of compound **79**

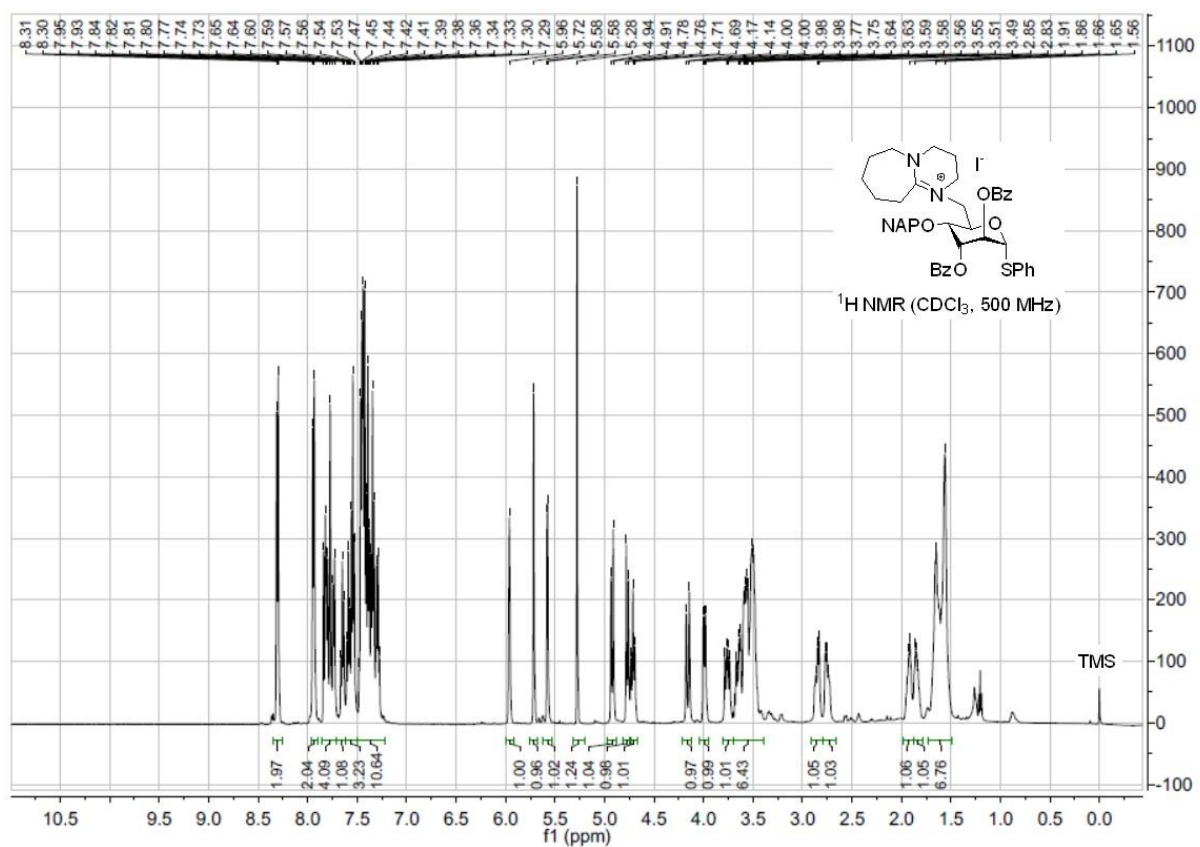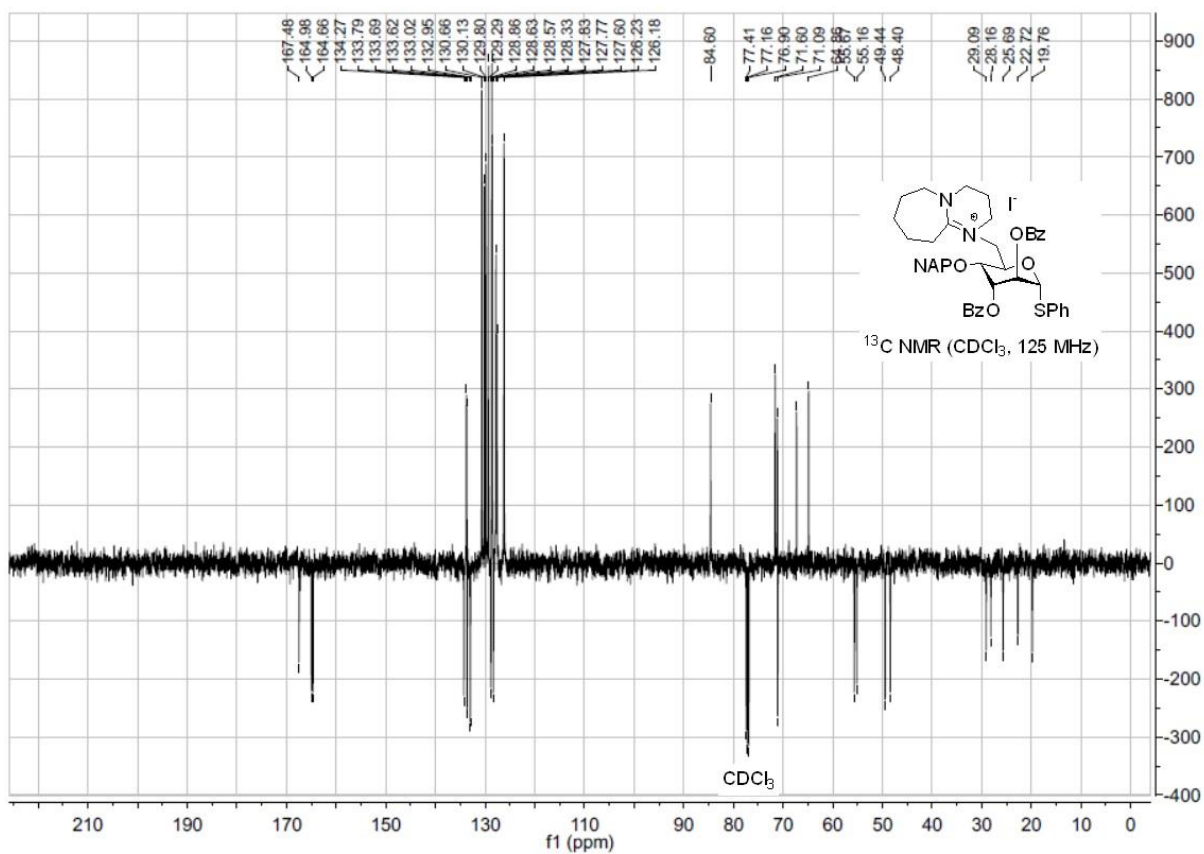

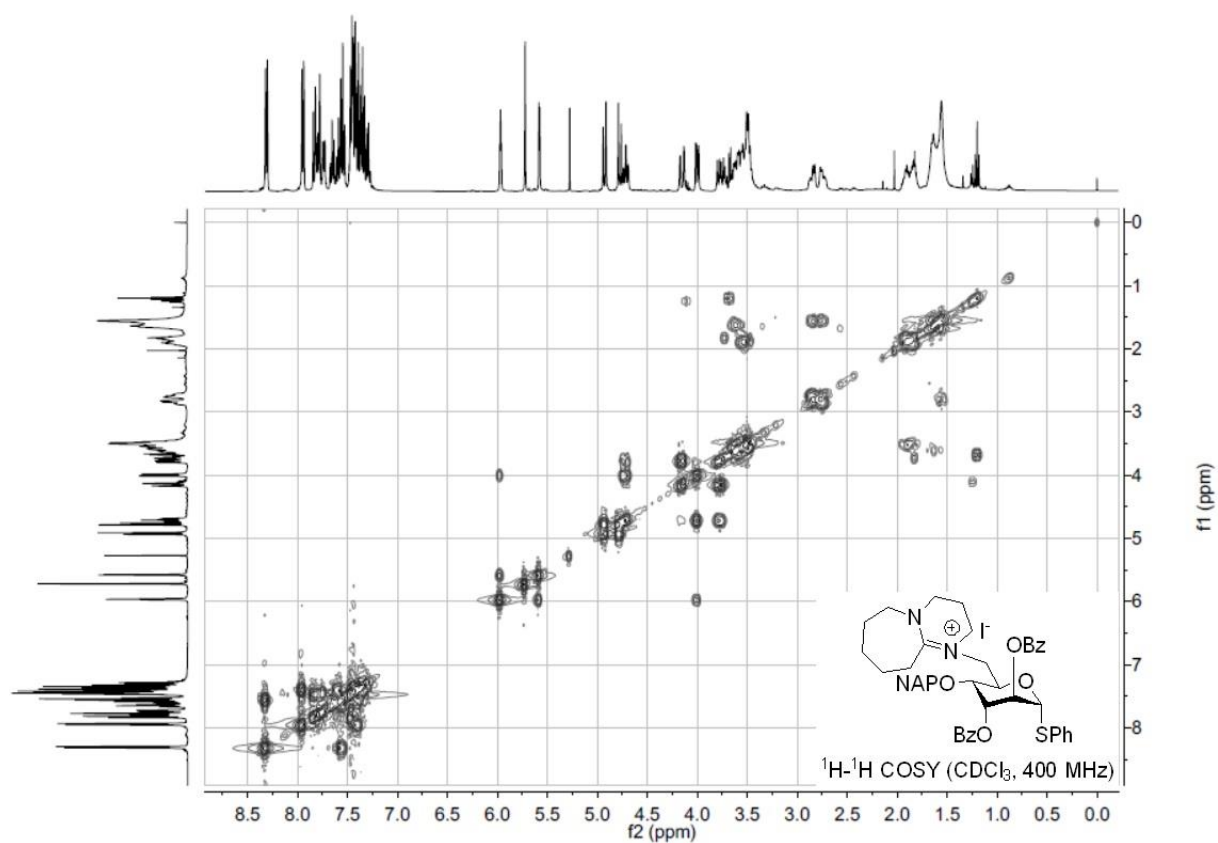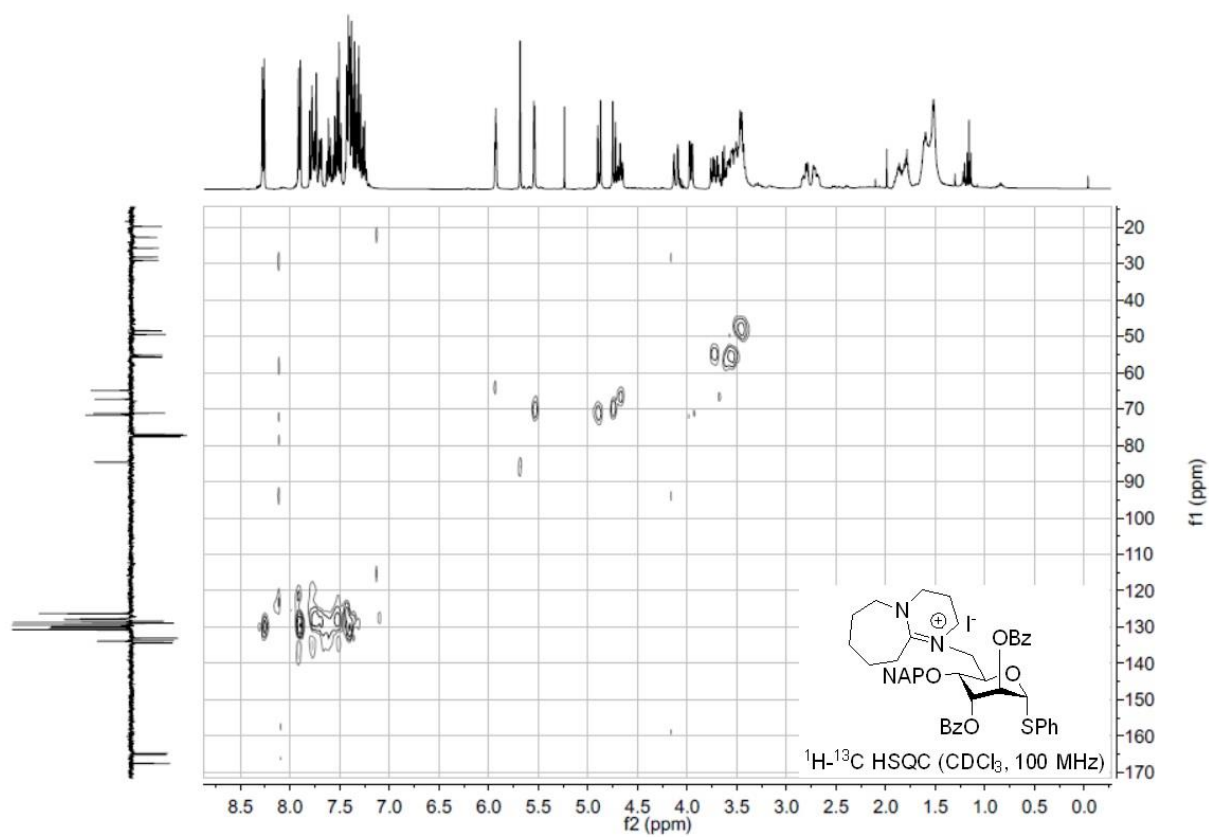

$^1\text{H}$  and  $^{13}\text{C}$  NMR spectra of compound **80**

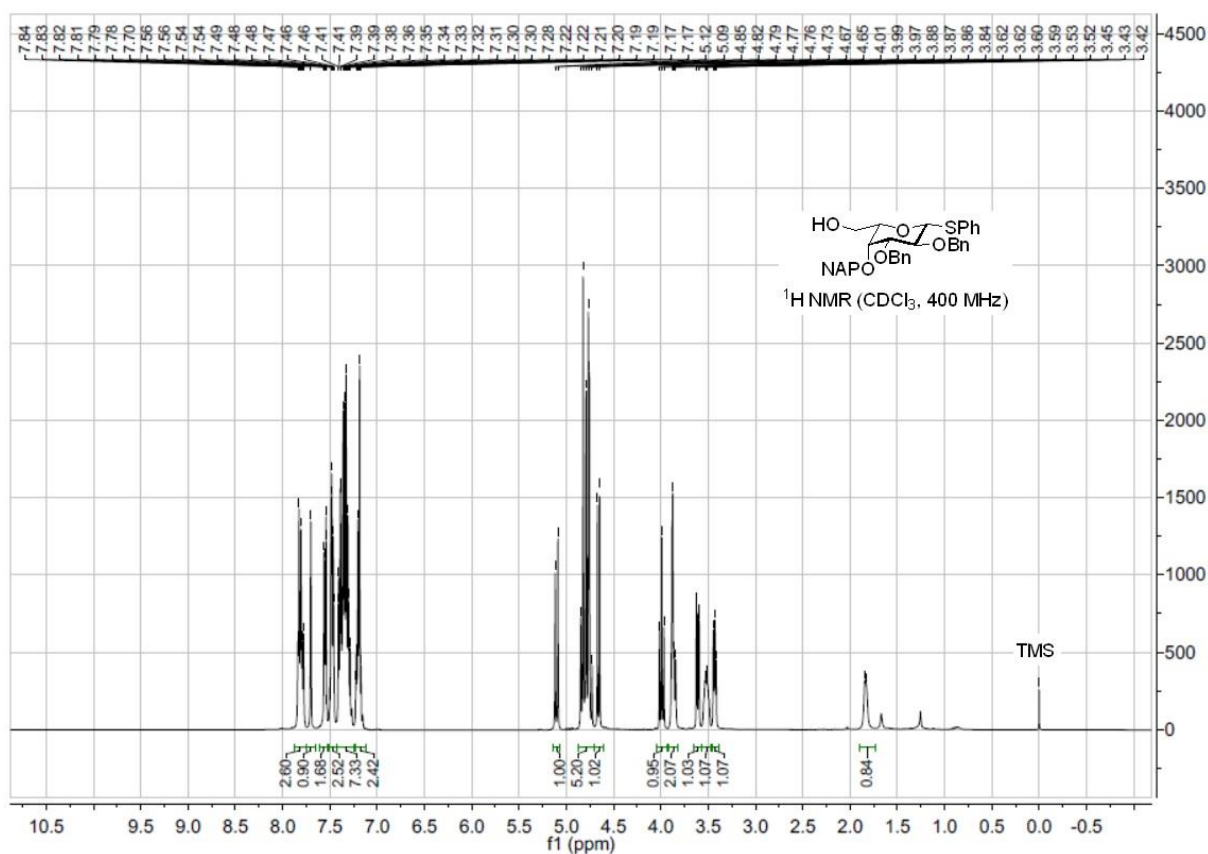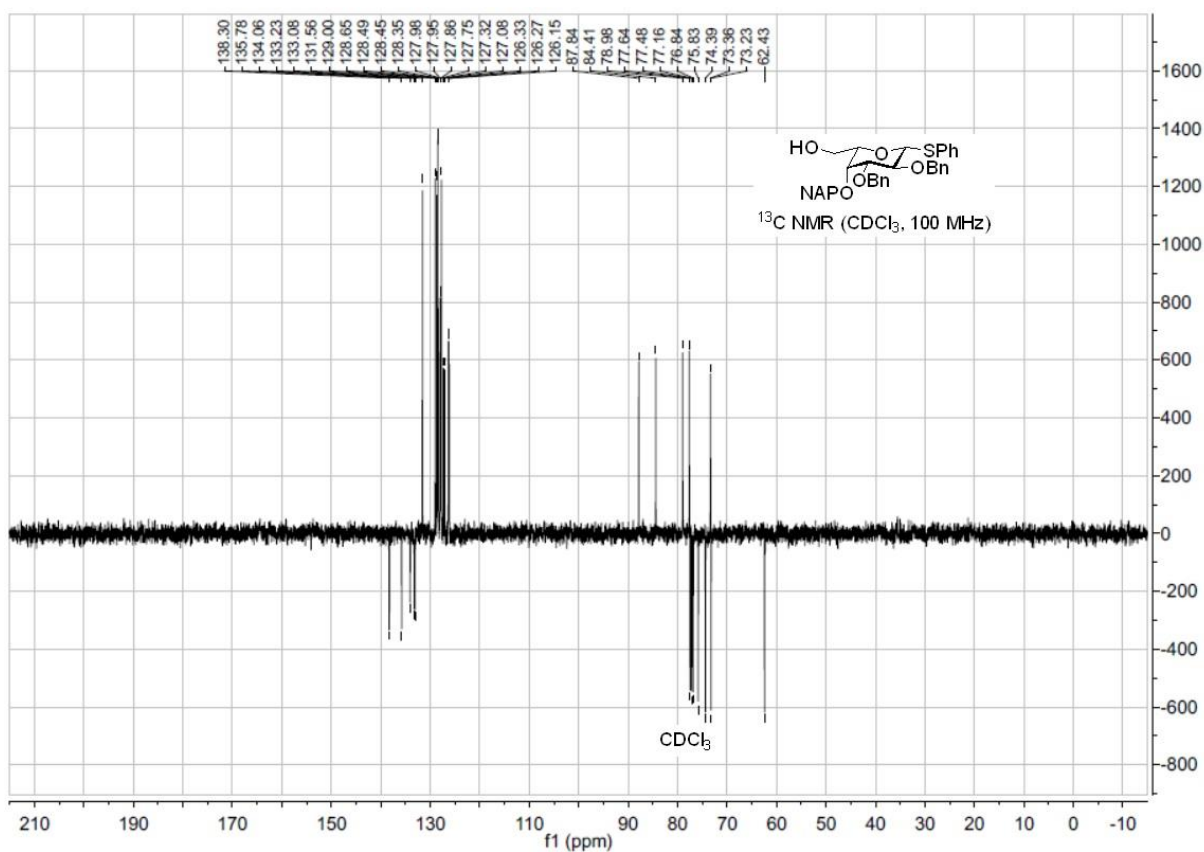

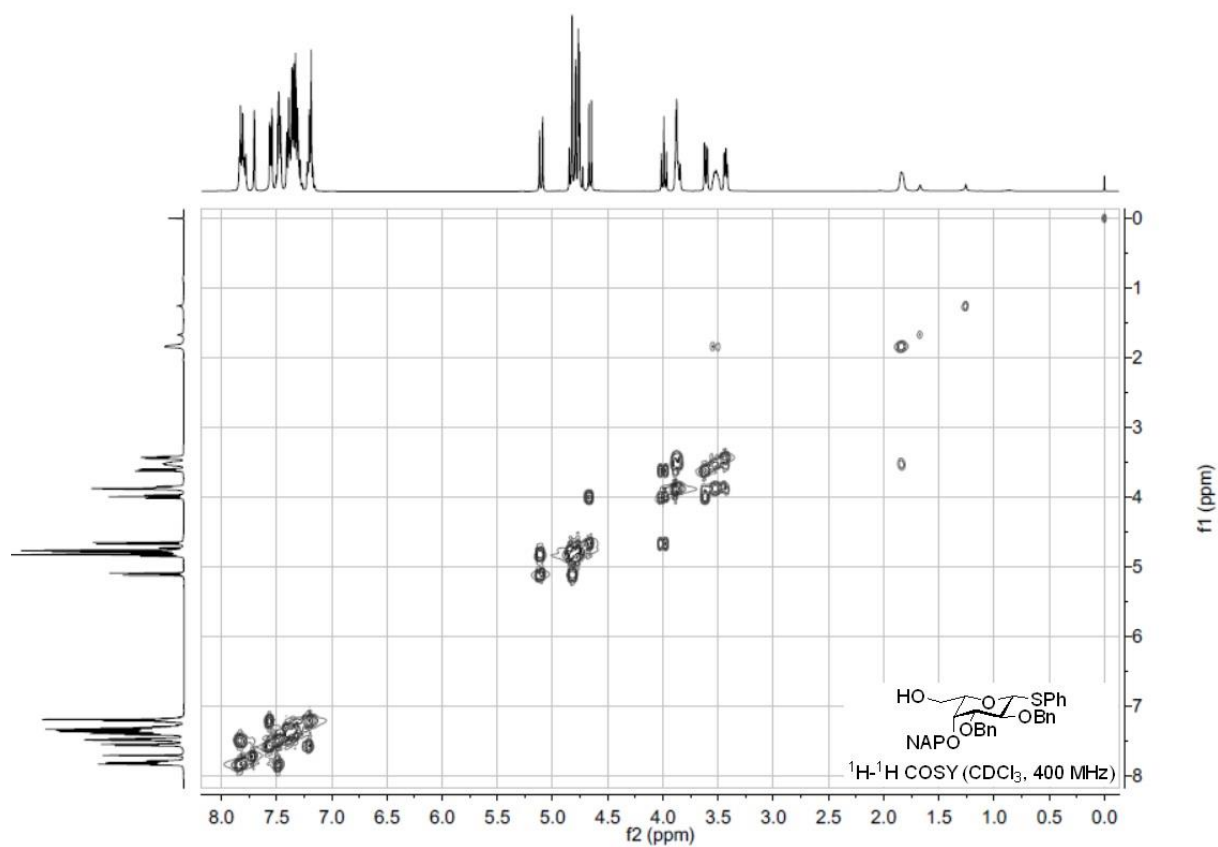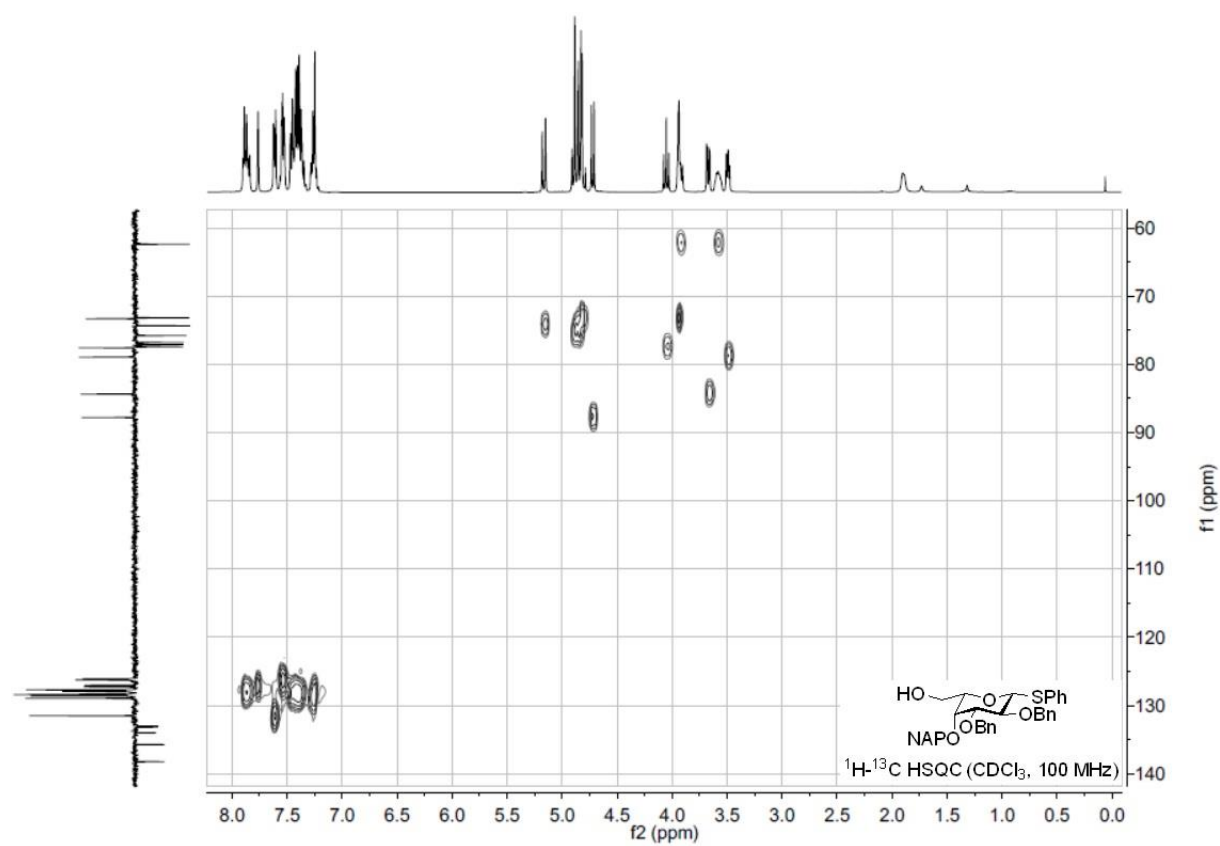



$^1\text{H}$  and  $^{13}\text{C}$  NMR spectra of compound **81**

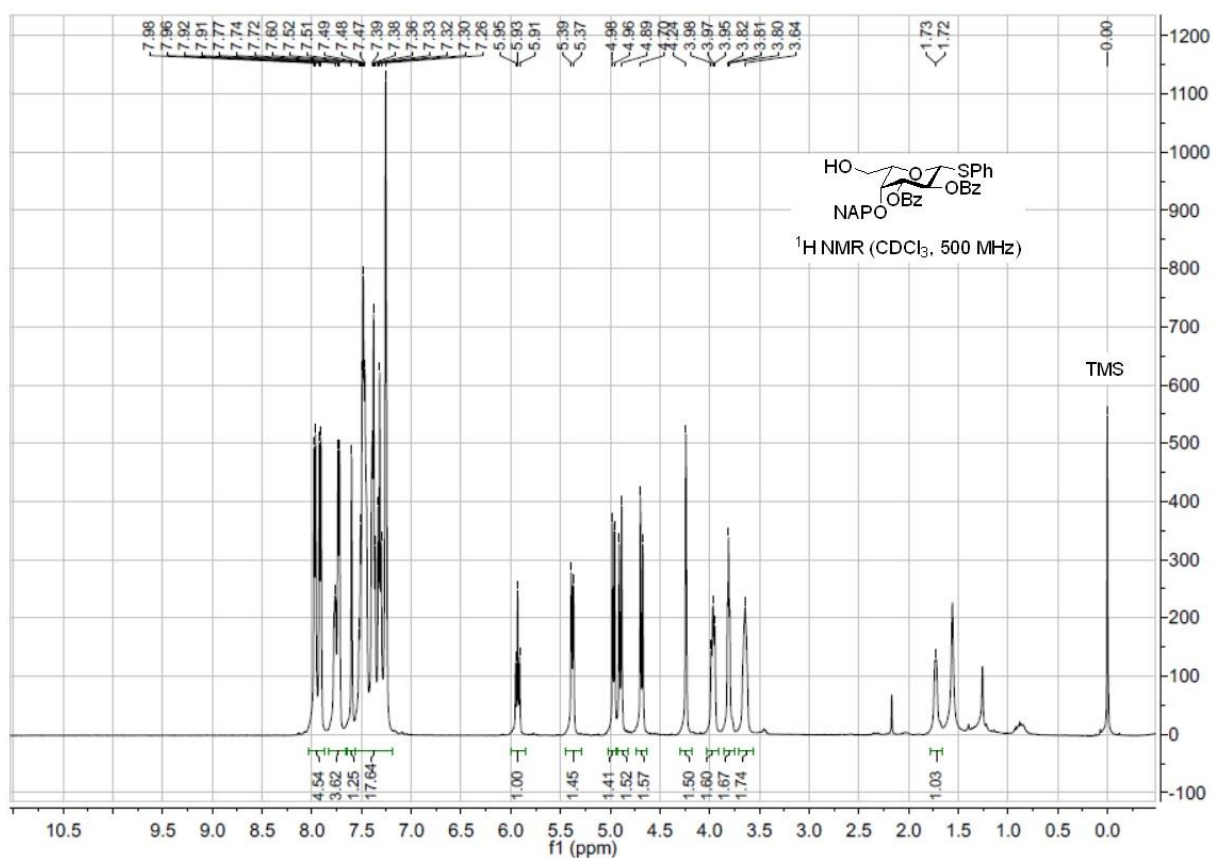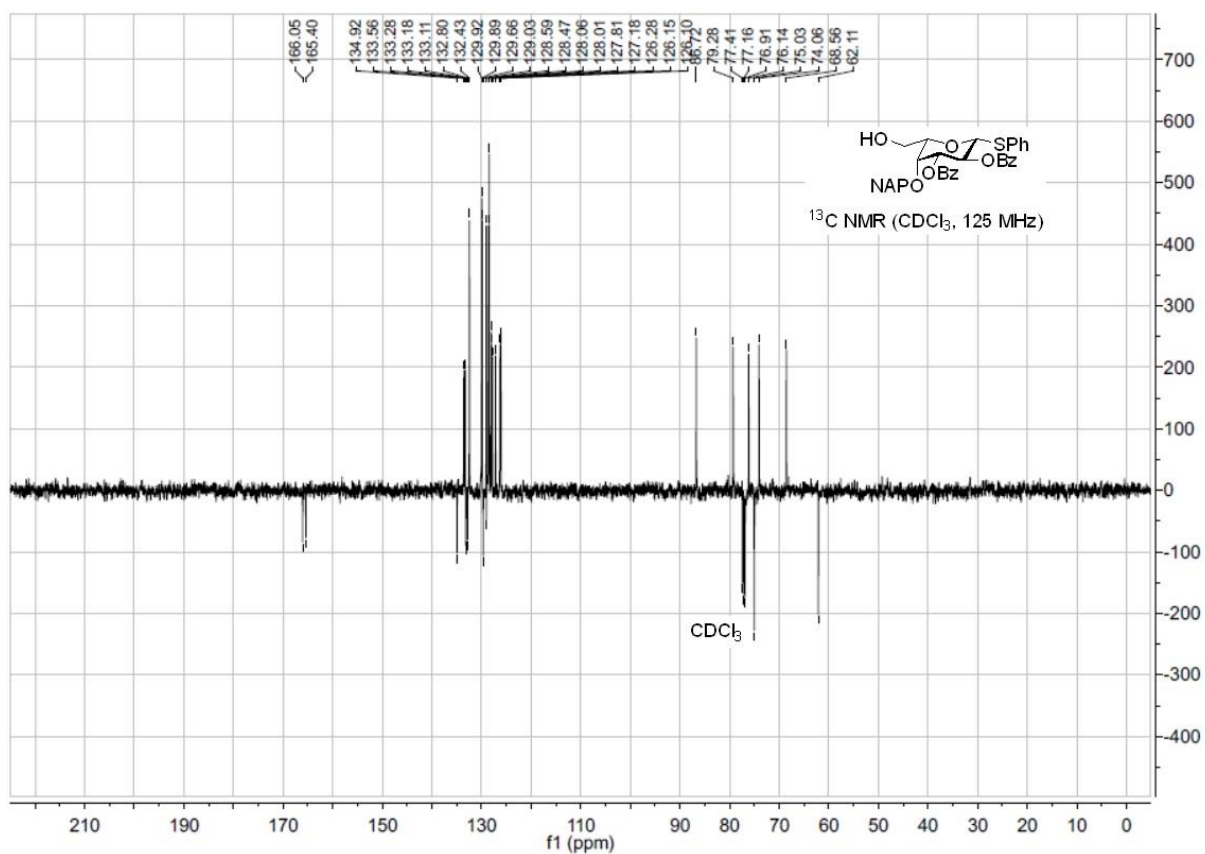



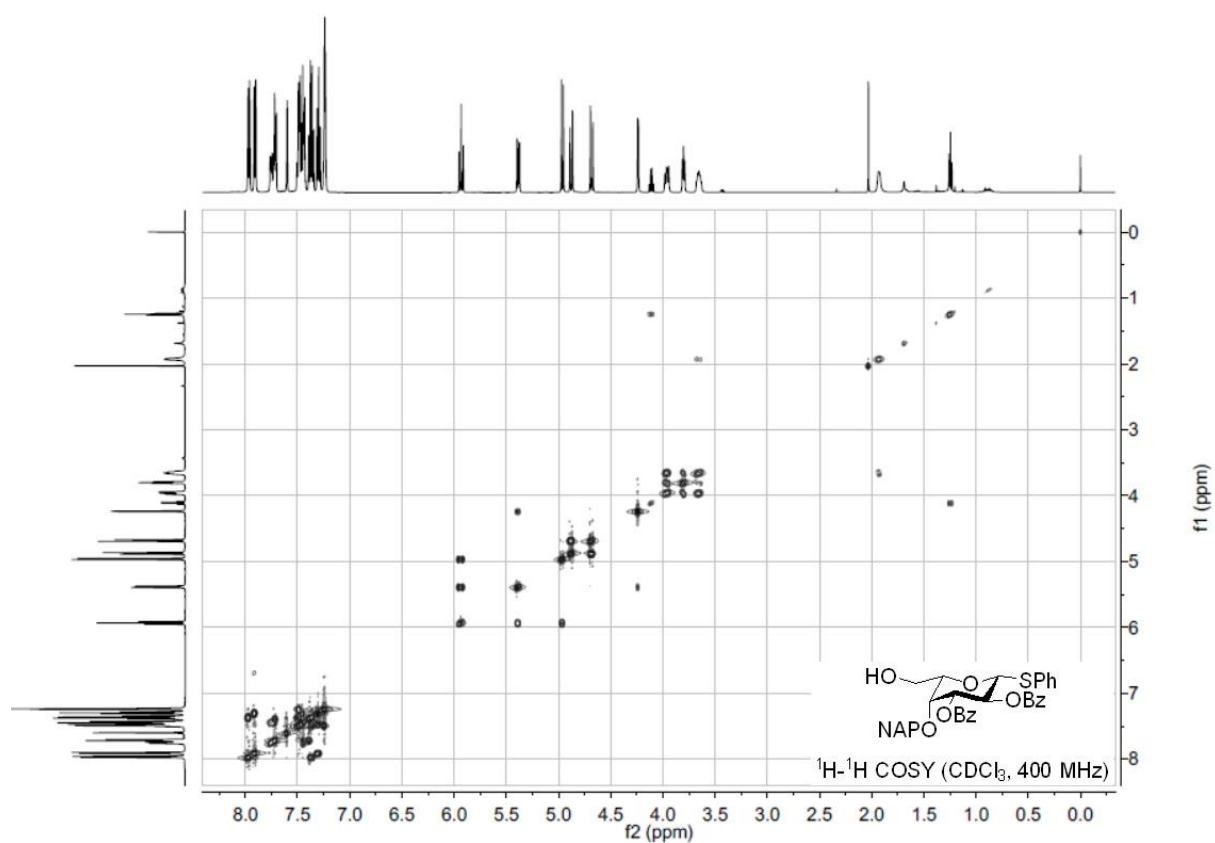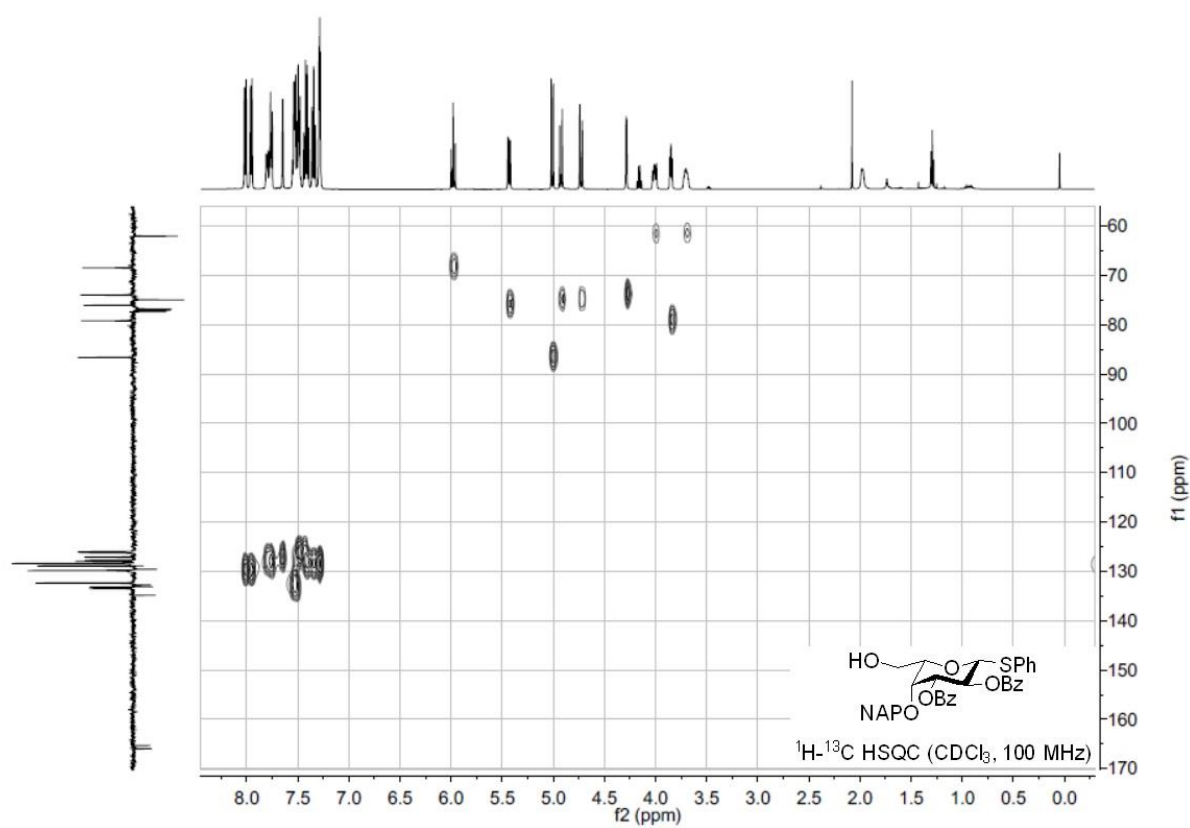

$^1\text{H}$  and  $^{13}\text{C}$  NMR spectra of compound **82**

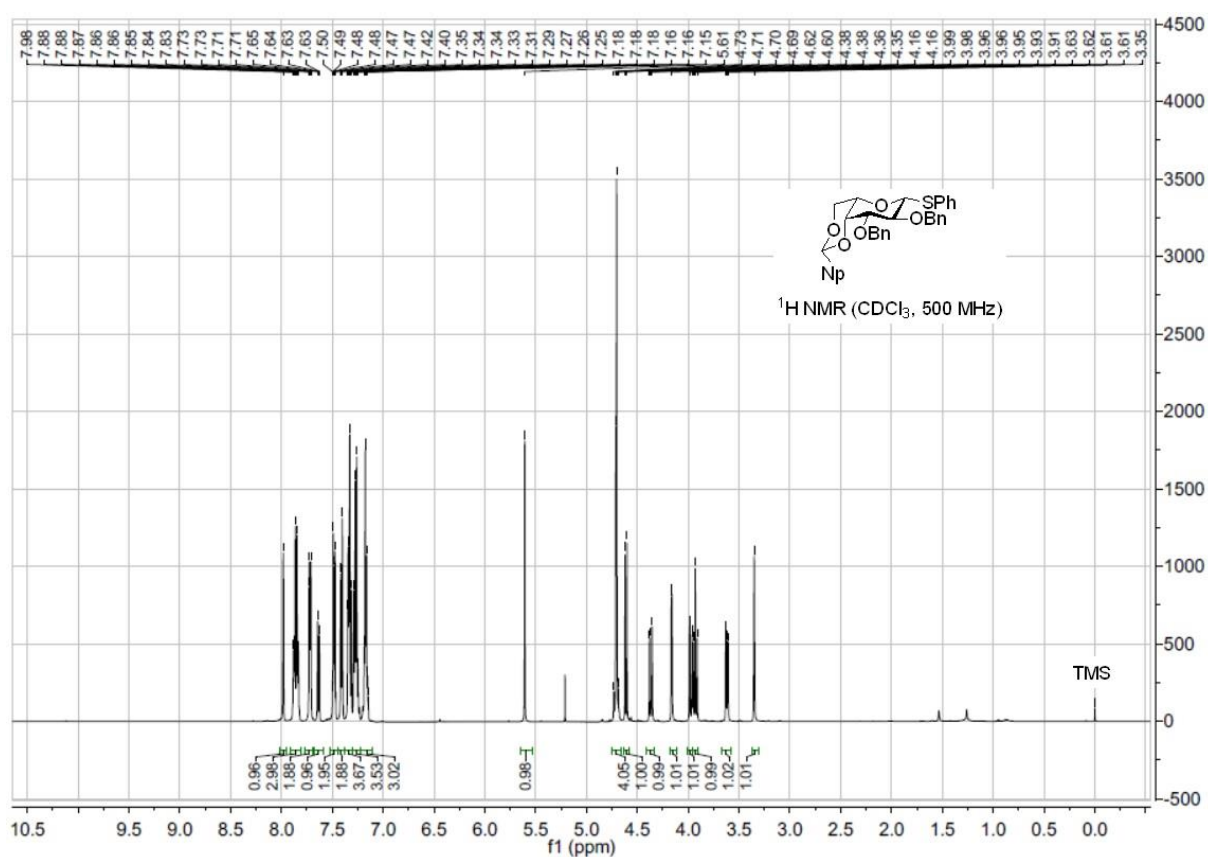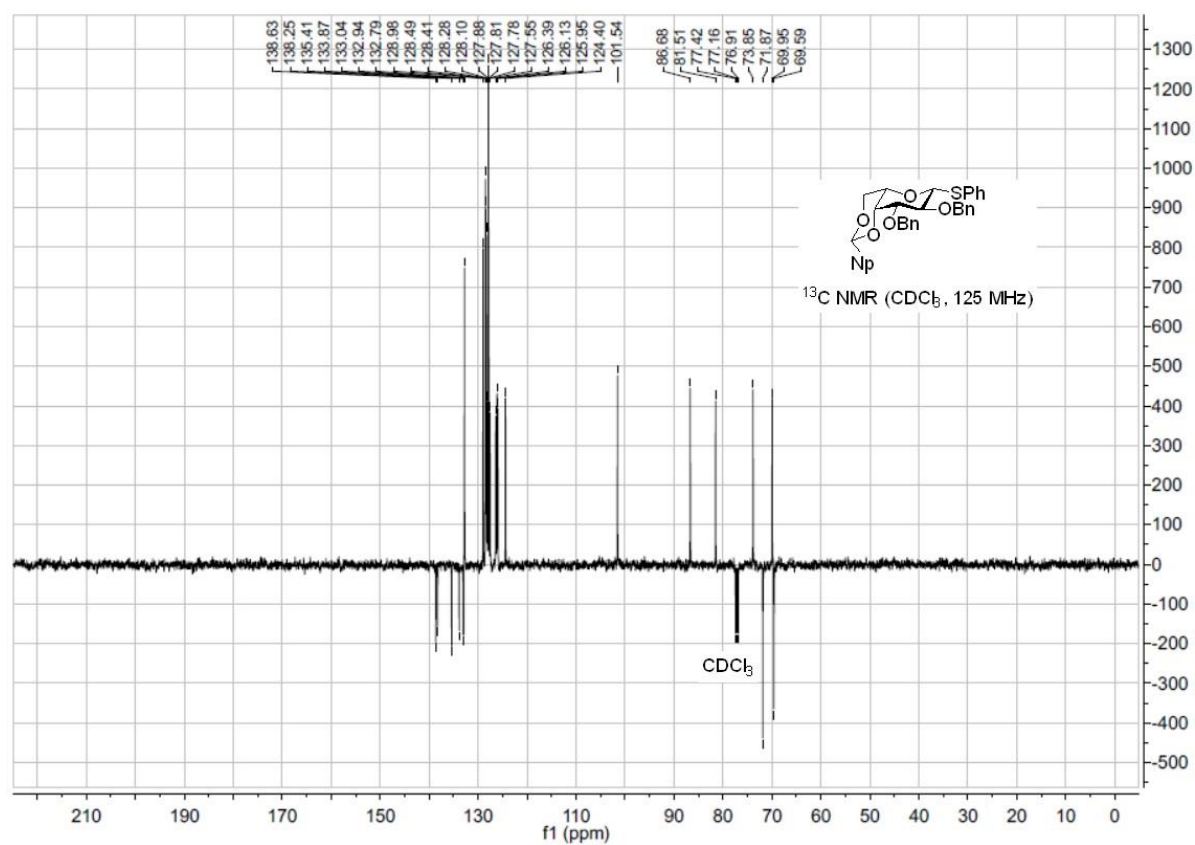

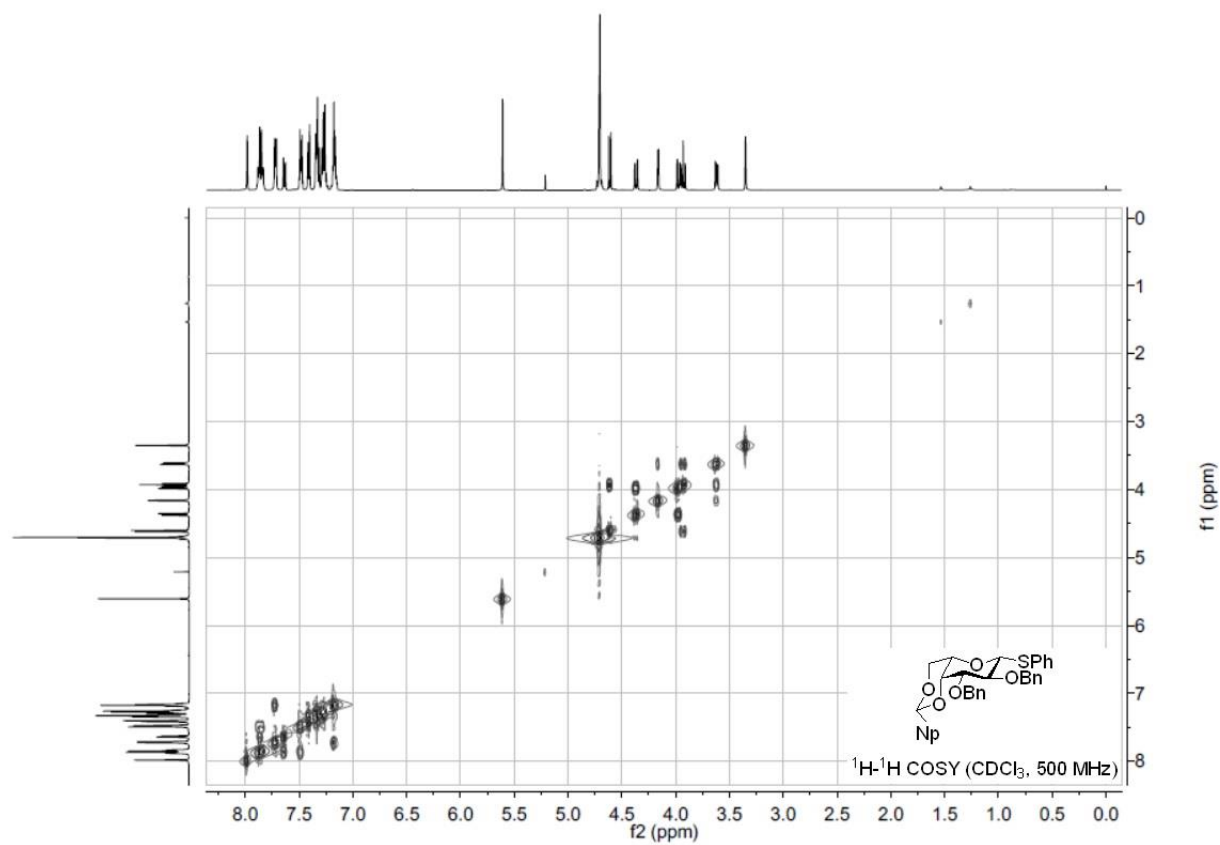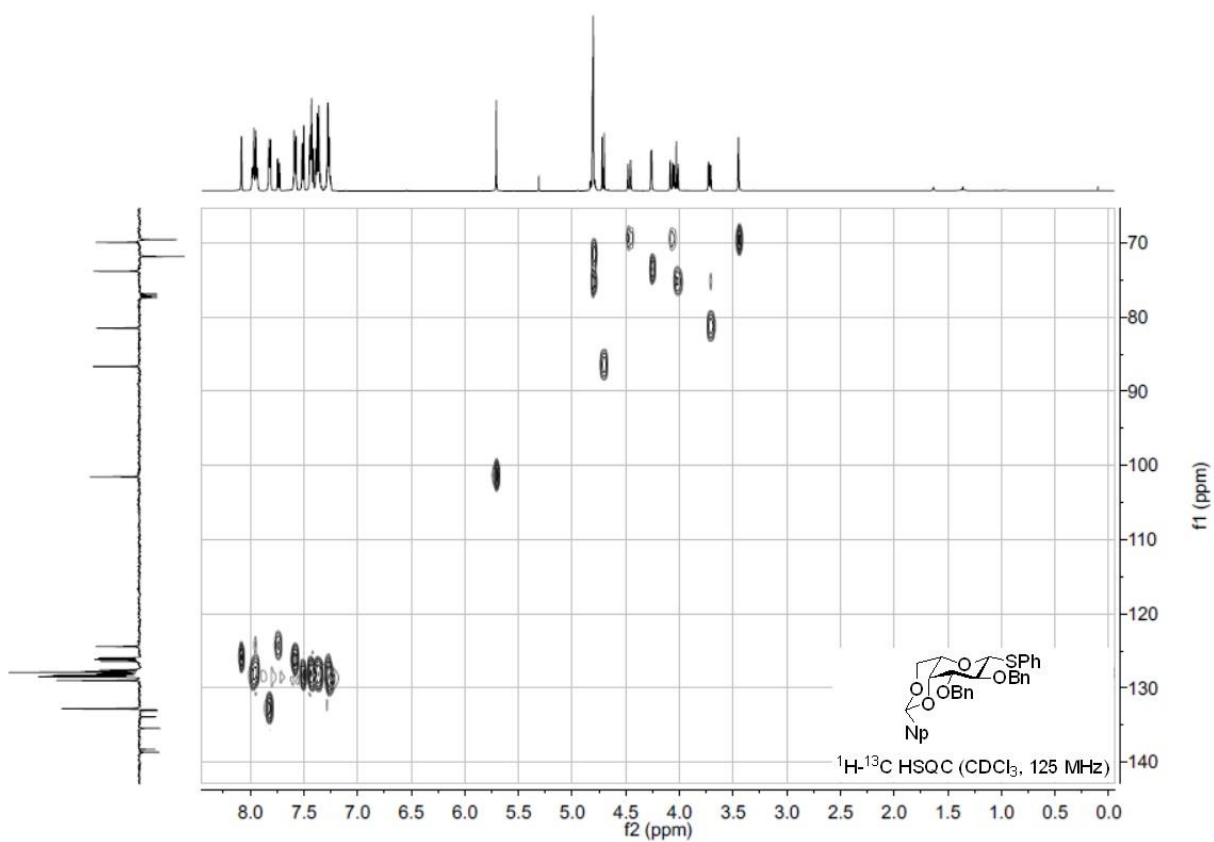

$^1\text{H}$  and  $^{13}\text{C}$  NMR spectra of compound **83**

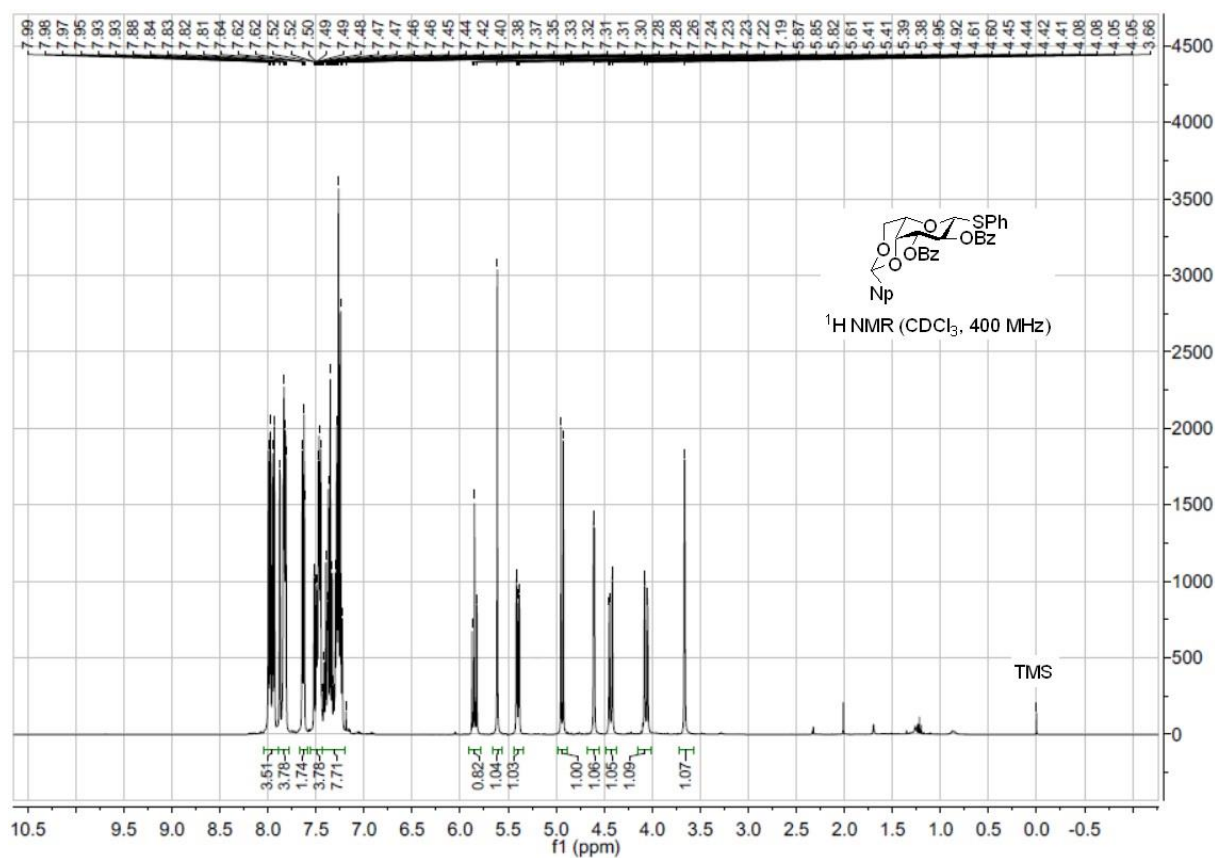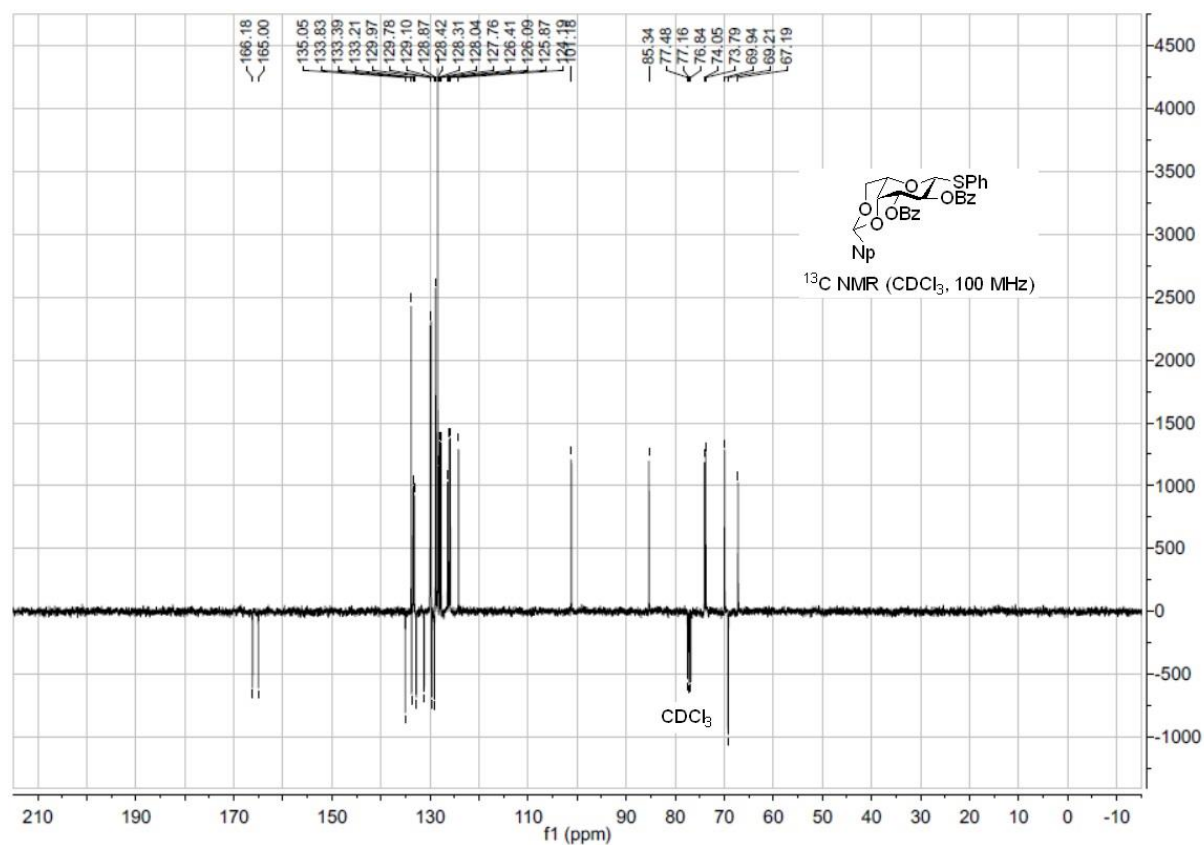

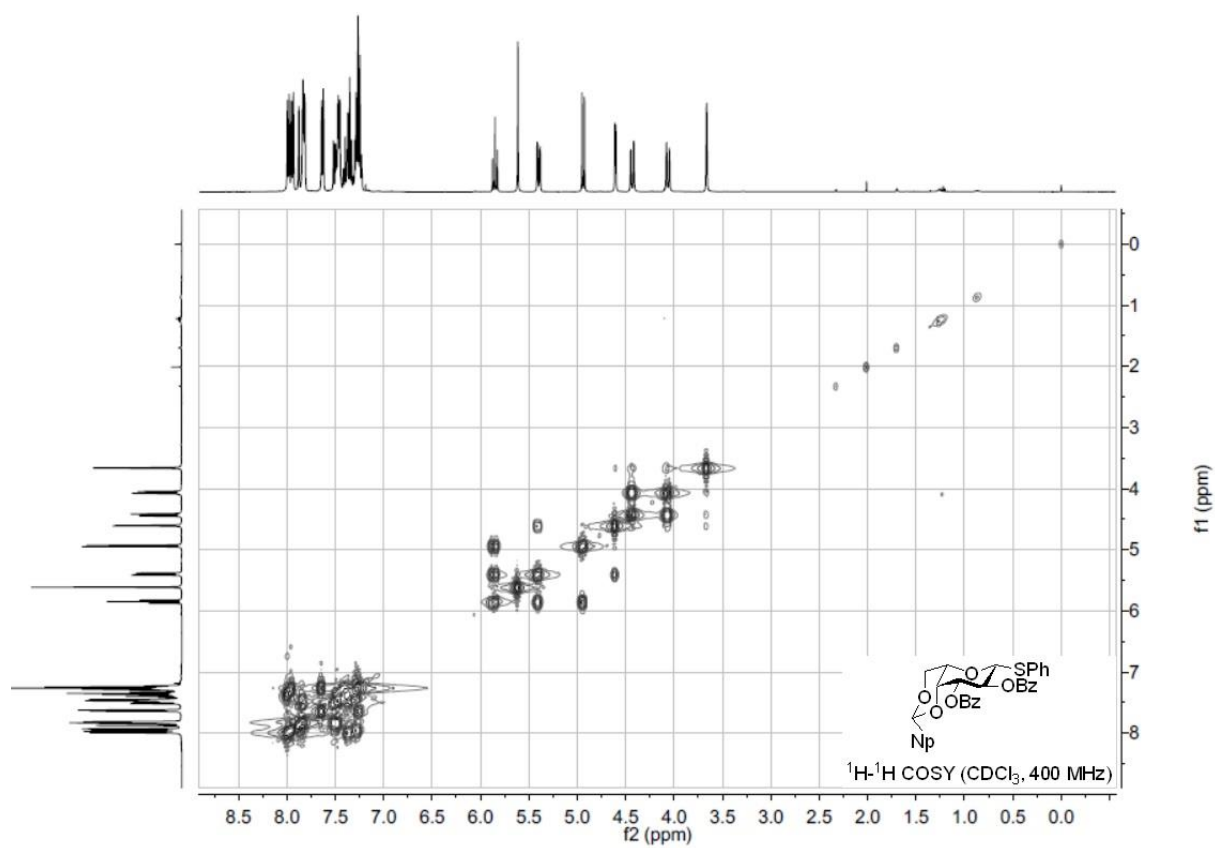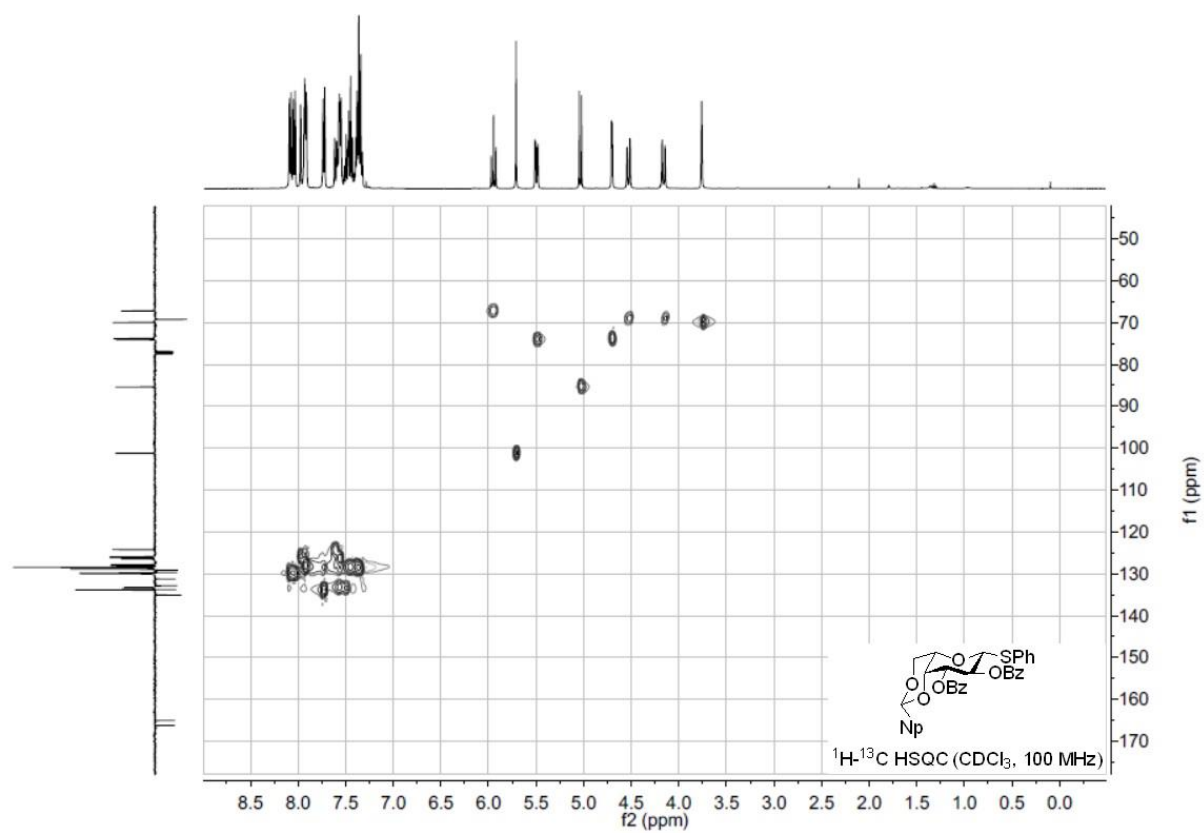

$^1\text{H}$  and  $^{13}\text{C}$  NMR spectra of compound 84

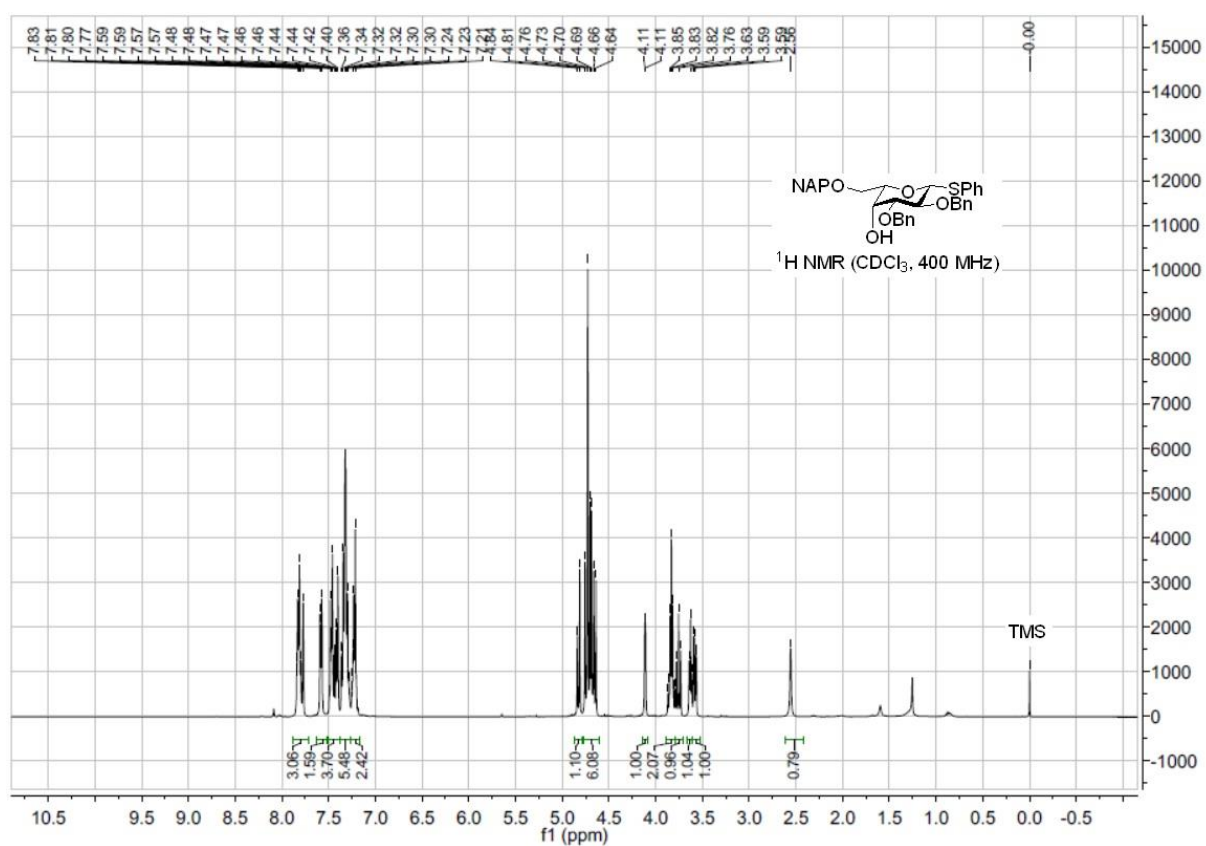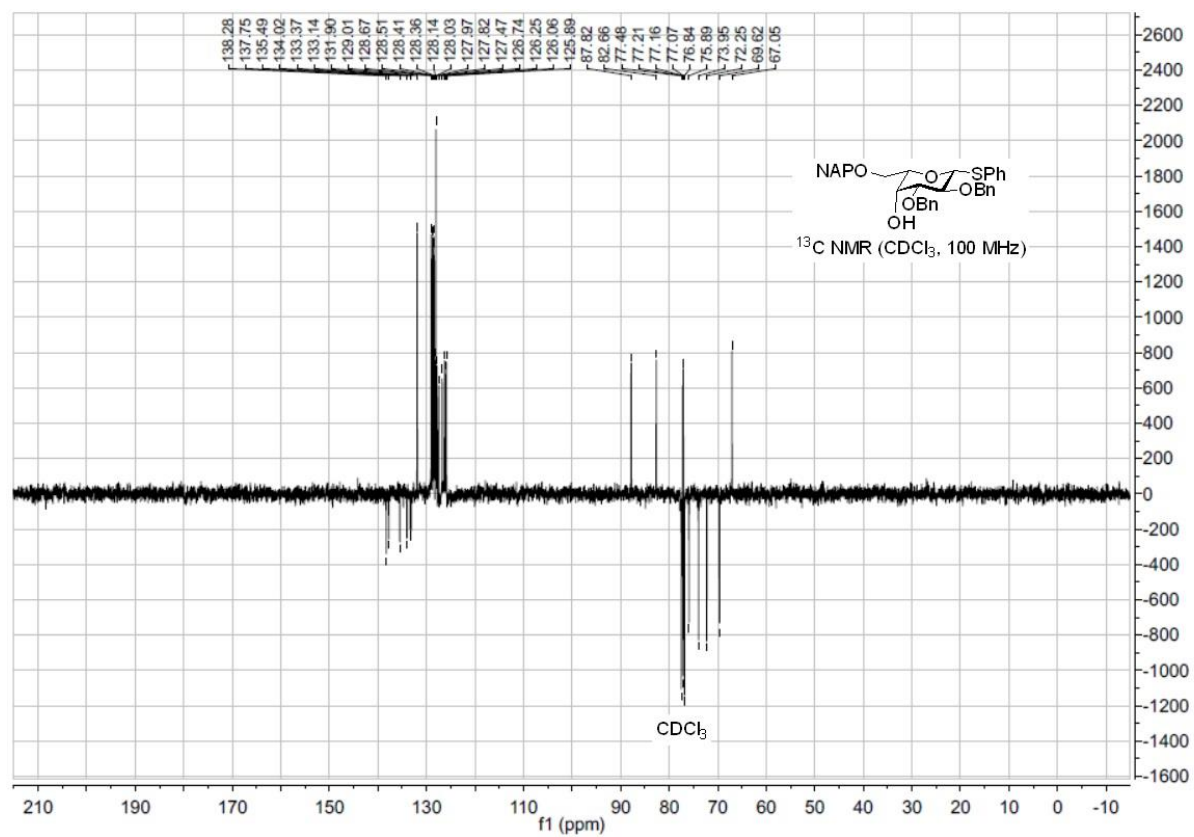

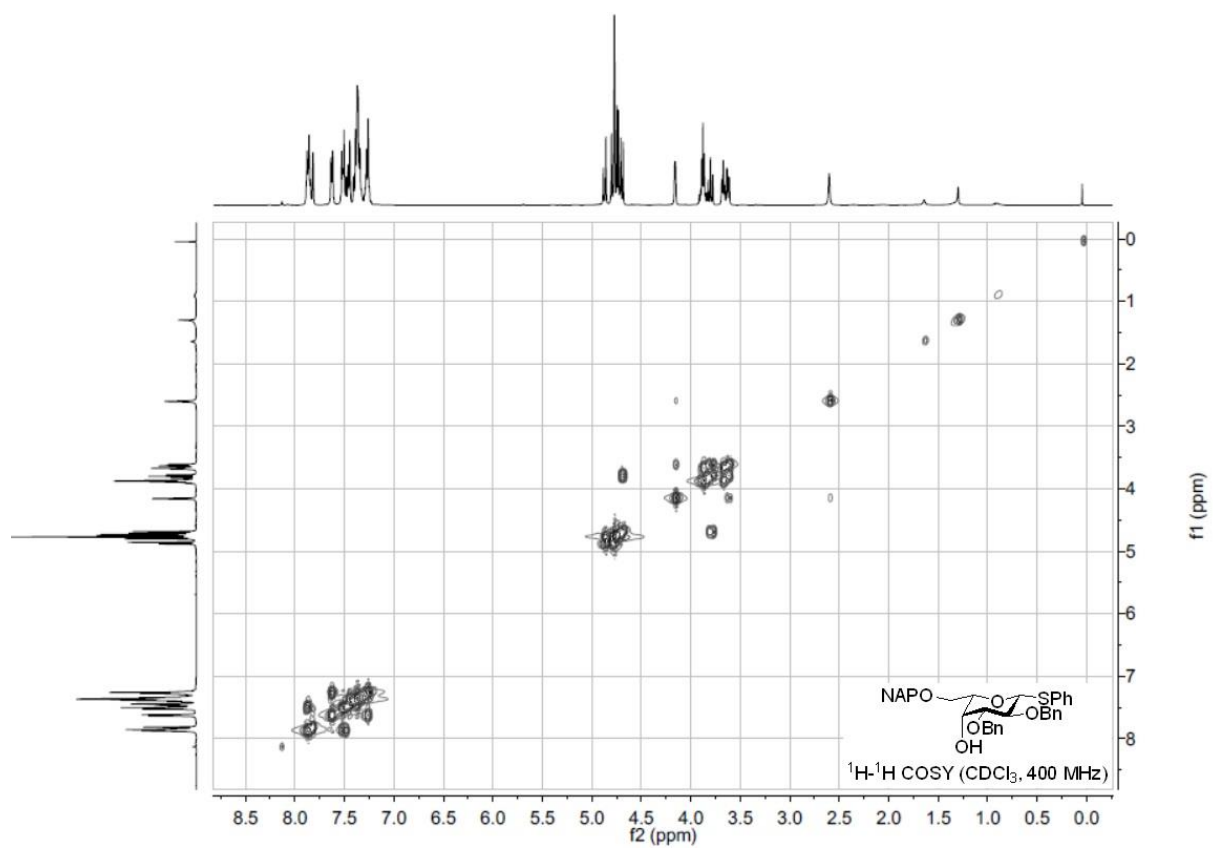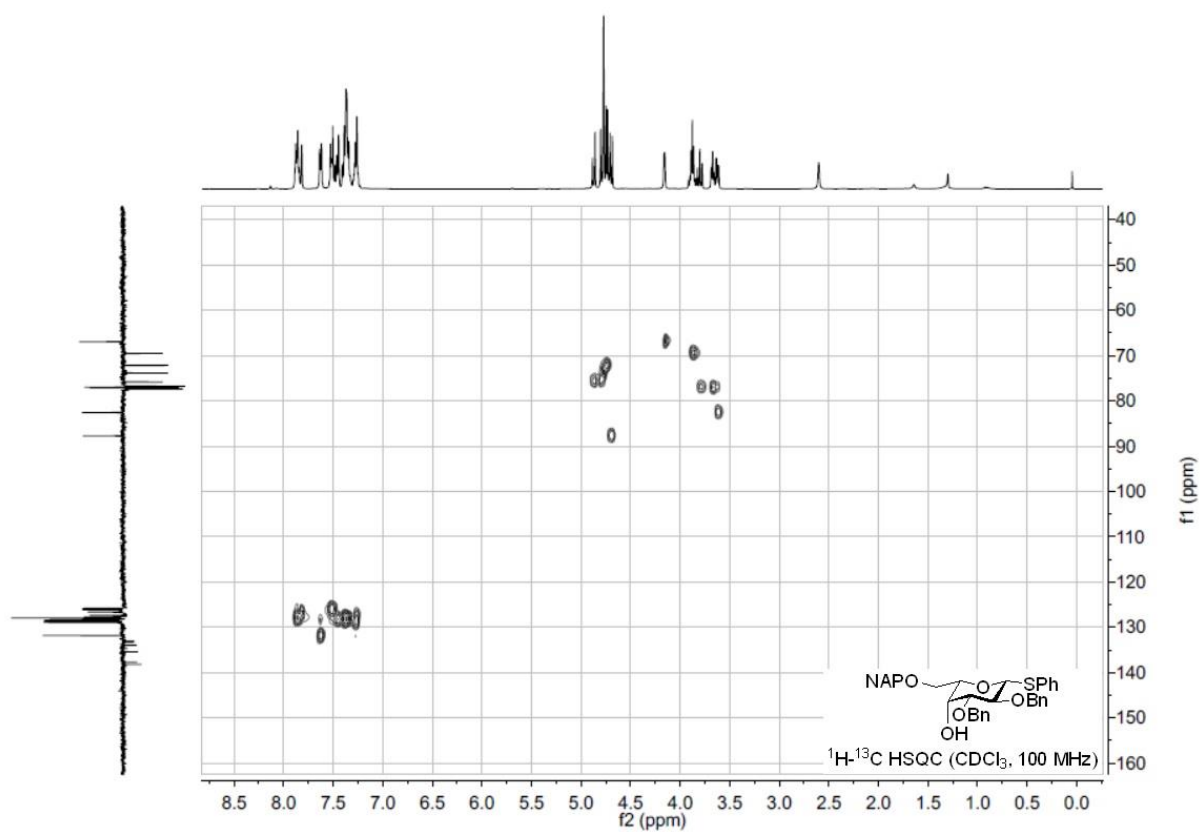



$^1\text{H}$  and  $^{13}\text{C}$  NMR spectra of compound 85

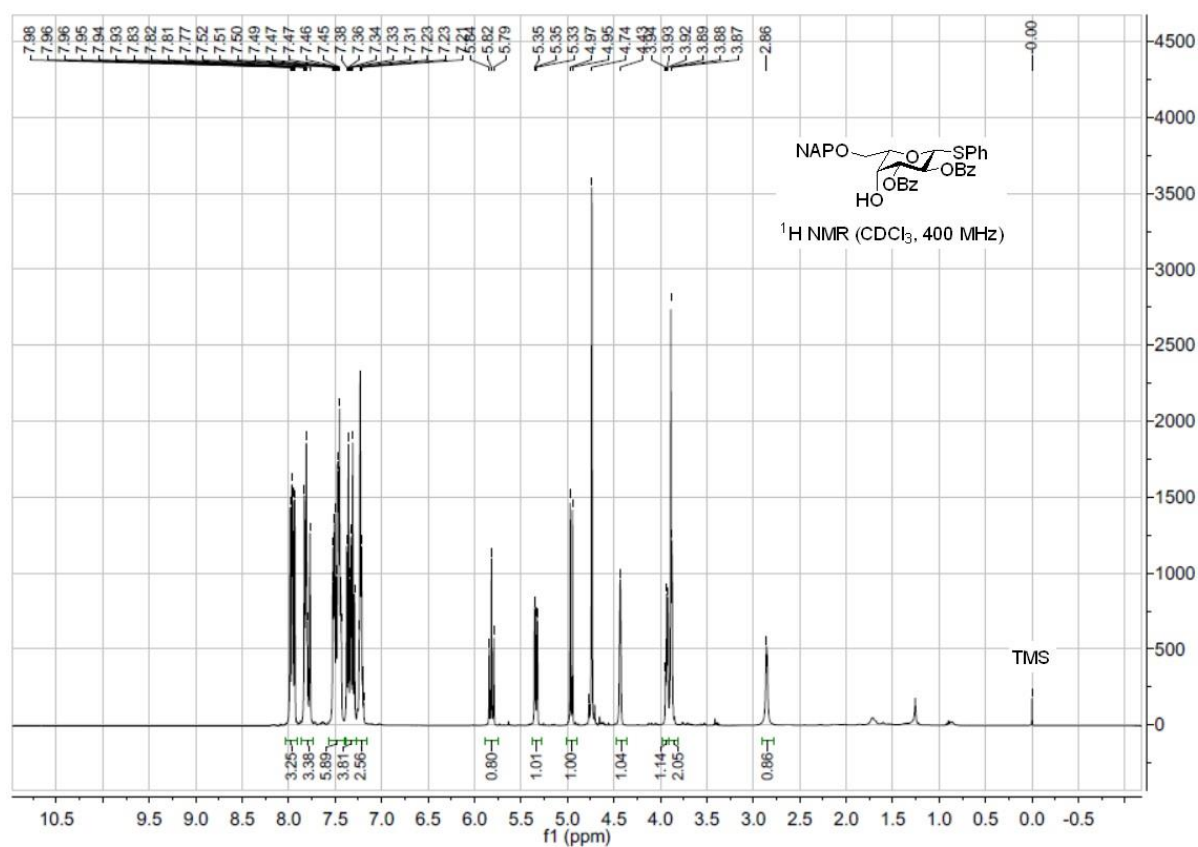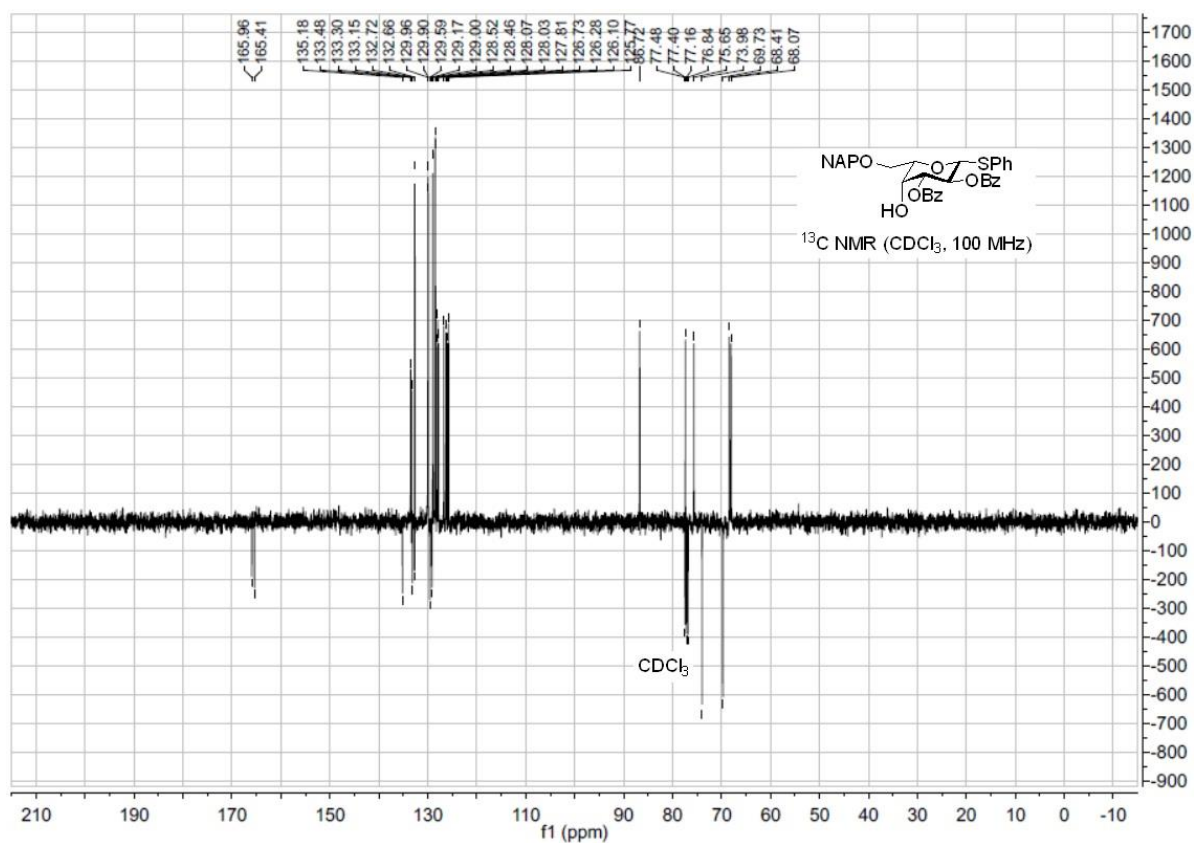

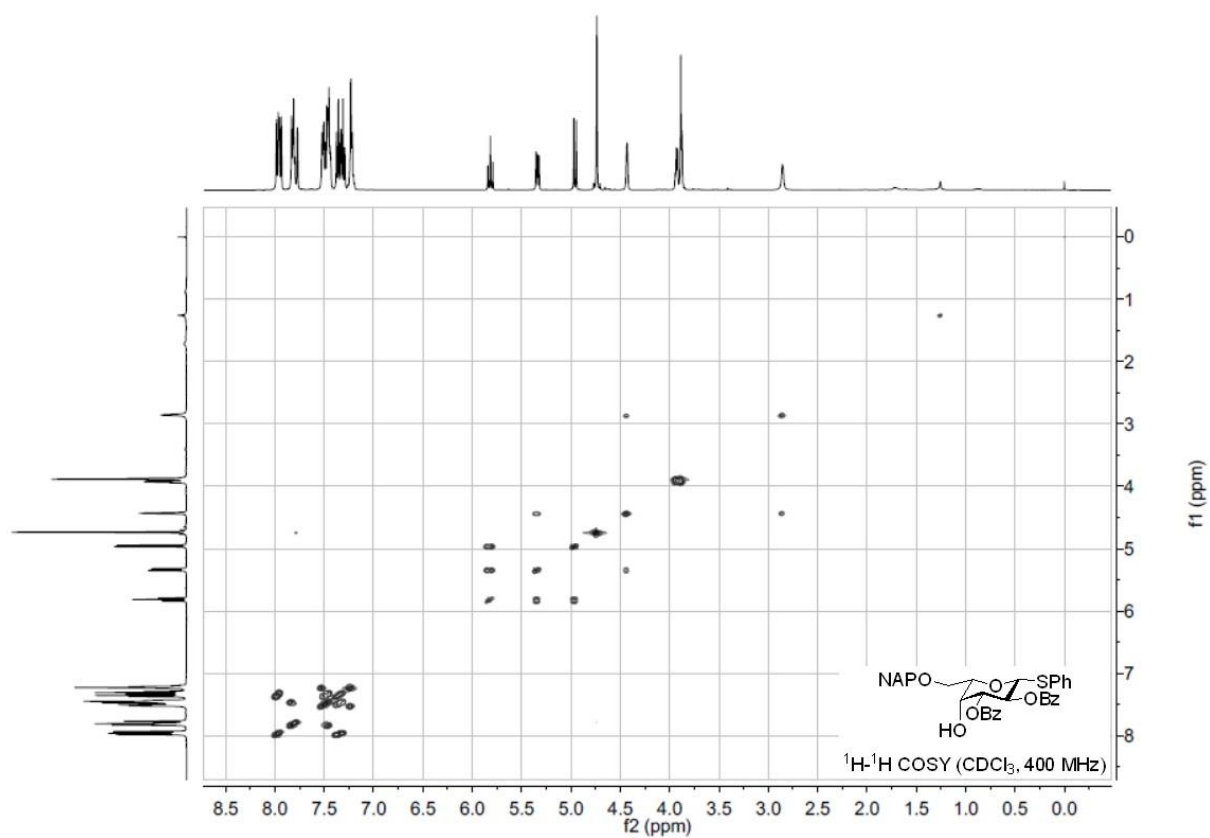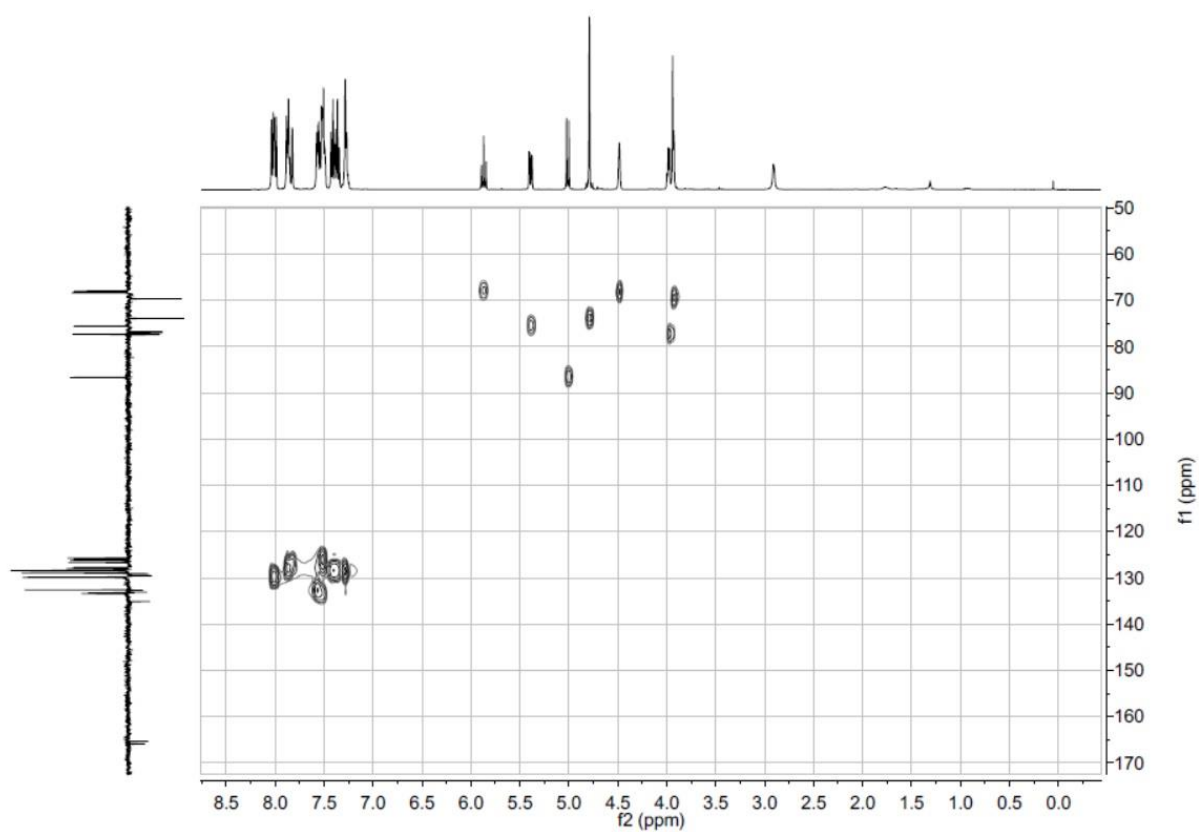

$^1\text{H}$  and  $^{13}\text{C}$  NMR spectra of compound **86**

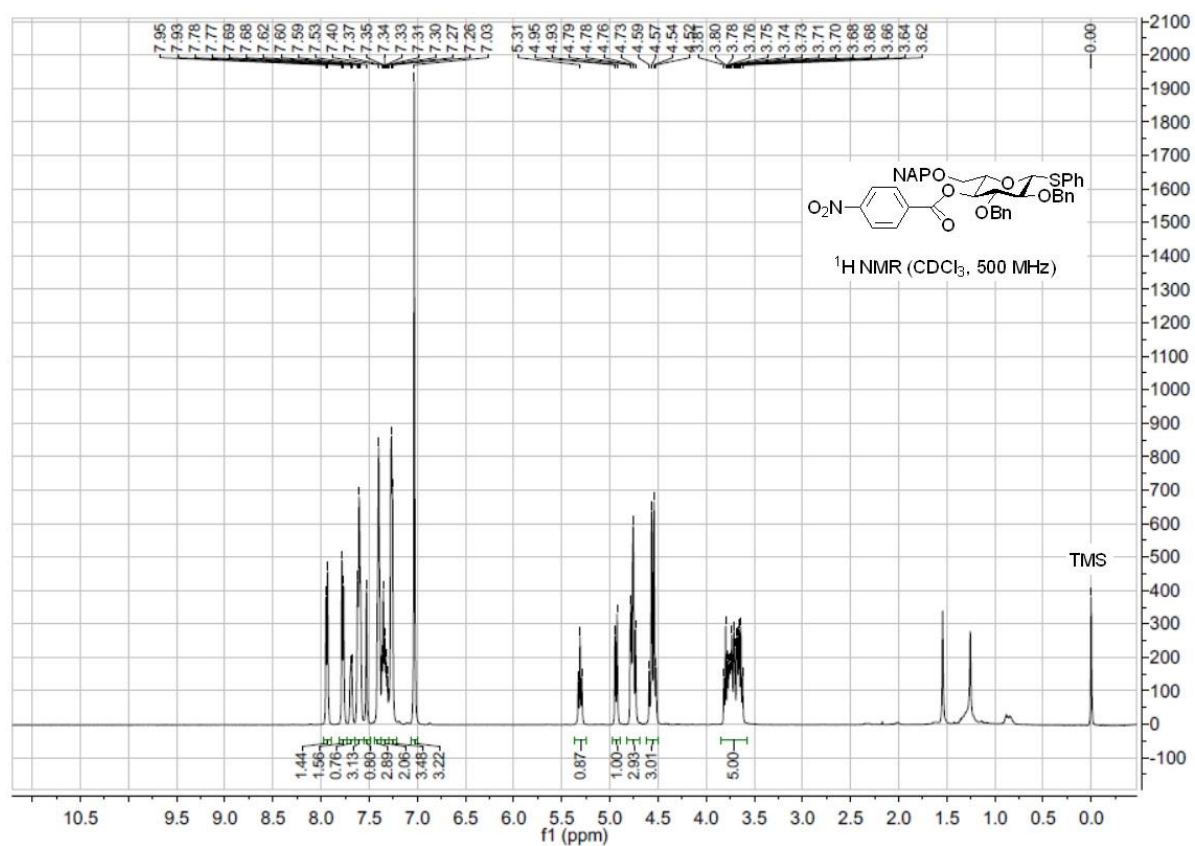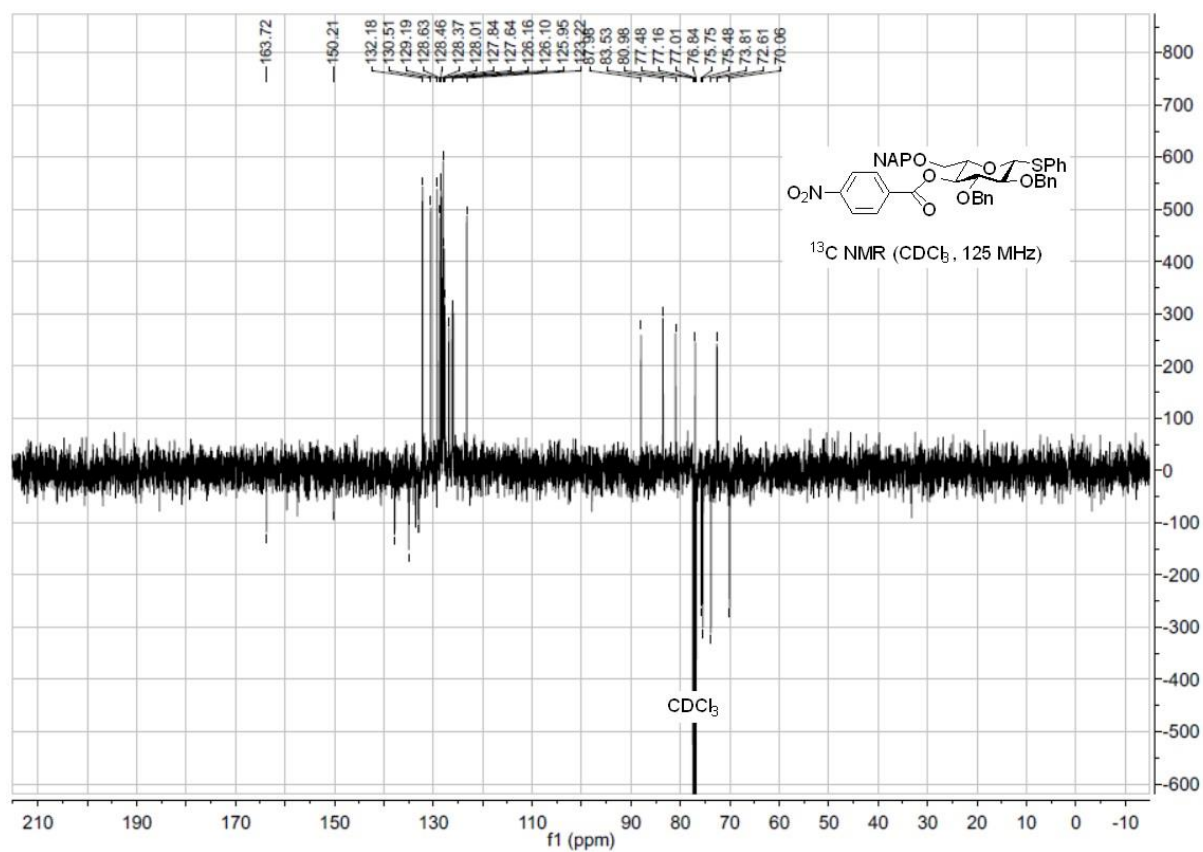

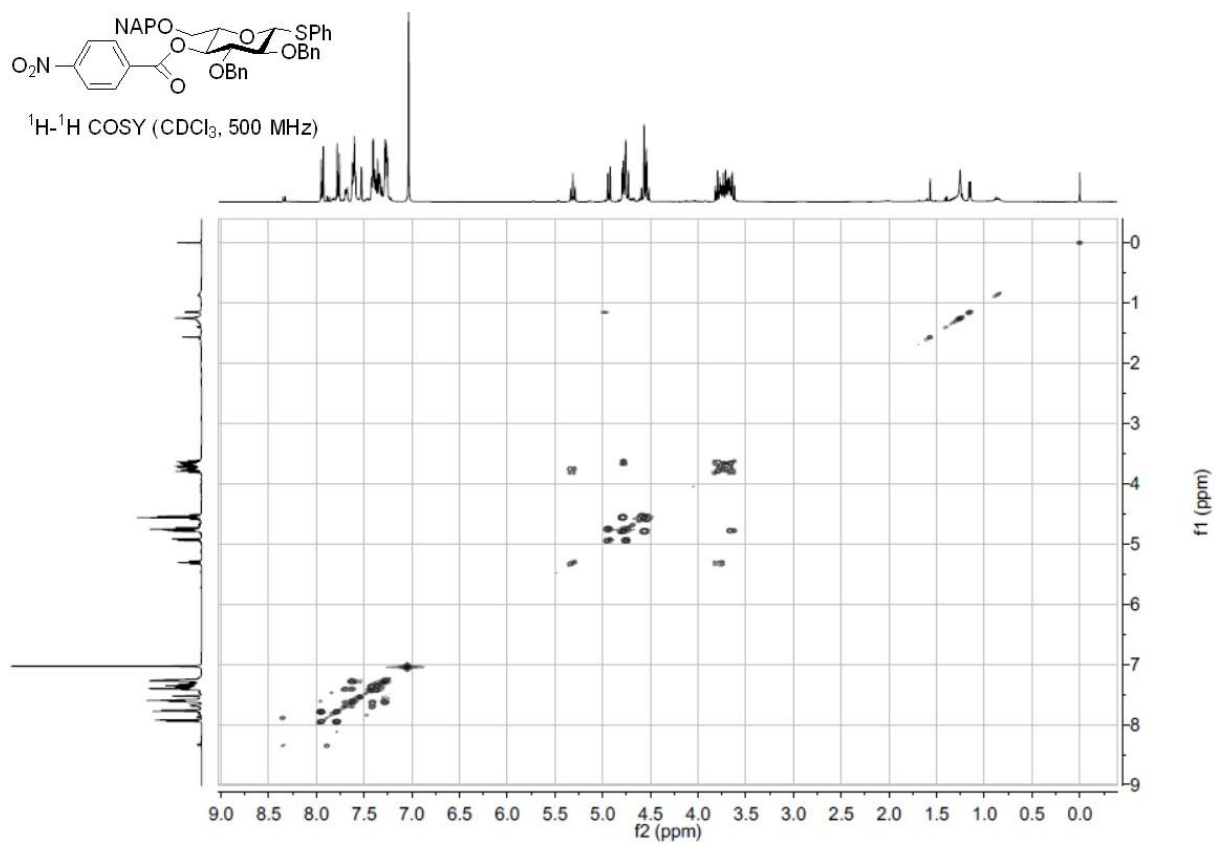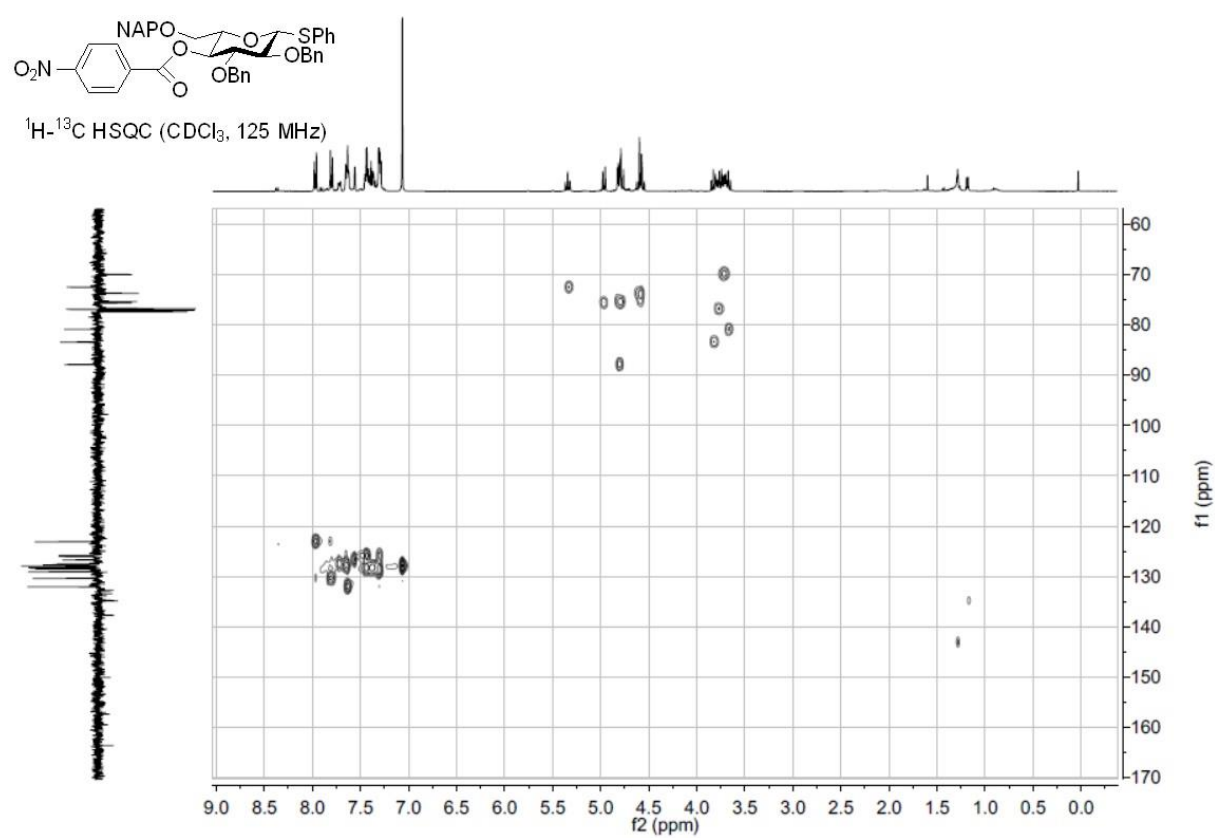

$^1\text{H}$  and  $^{13}\text{C}$  NMR spectra of compound **87**

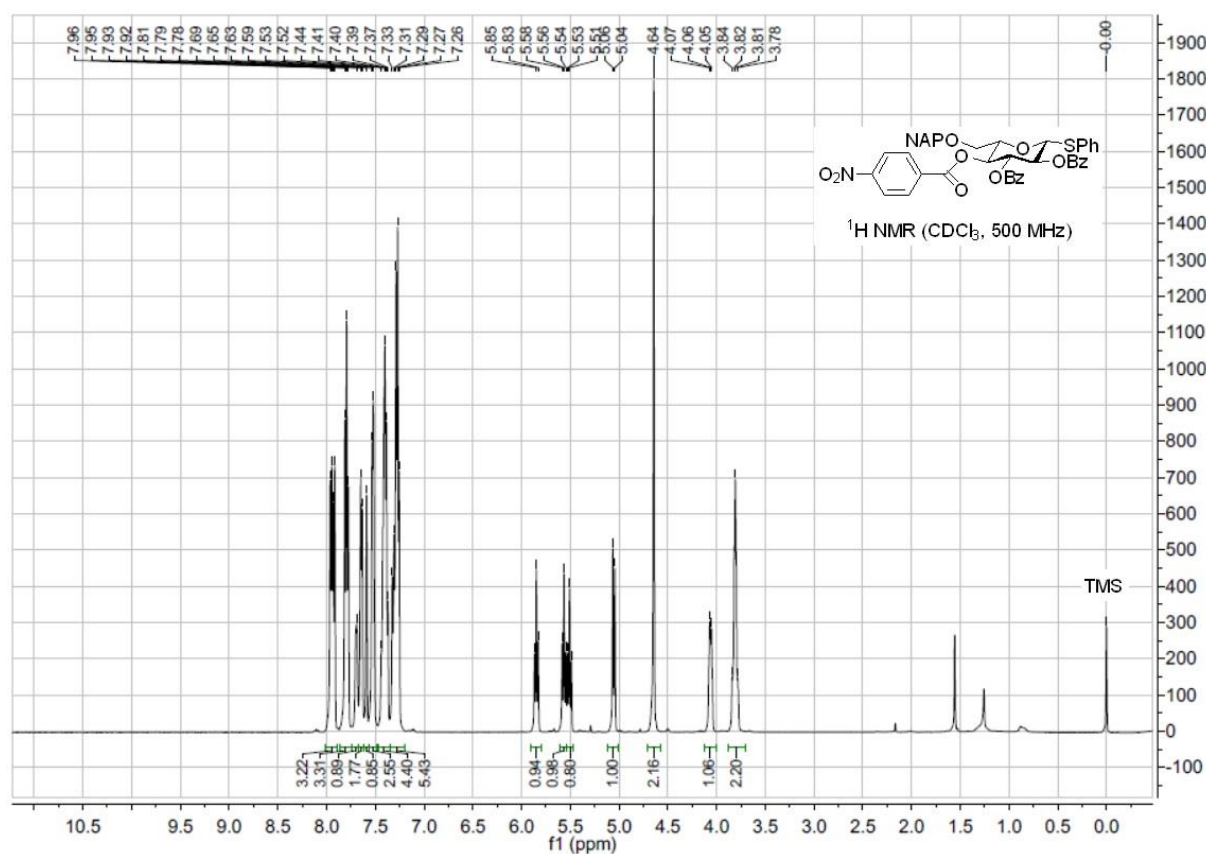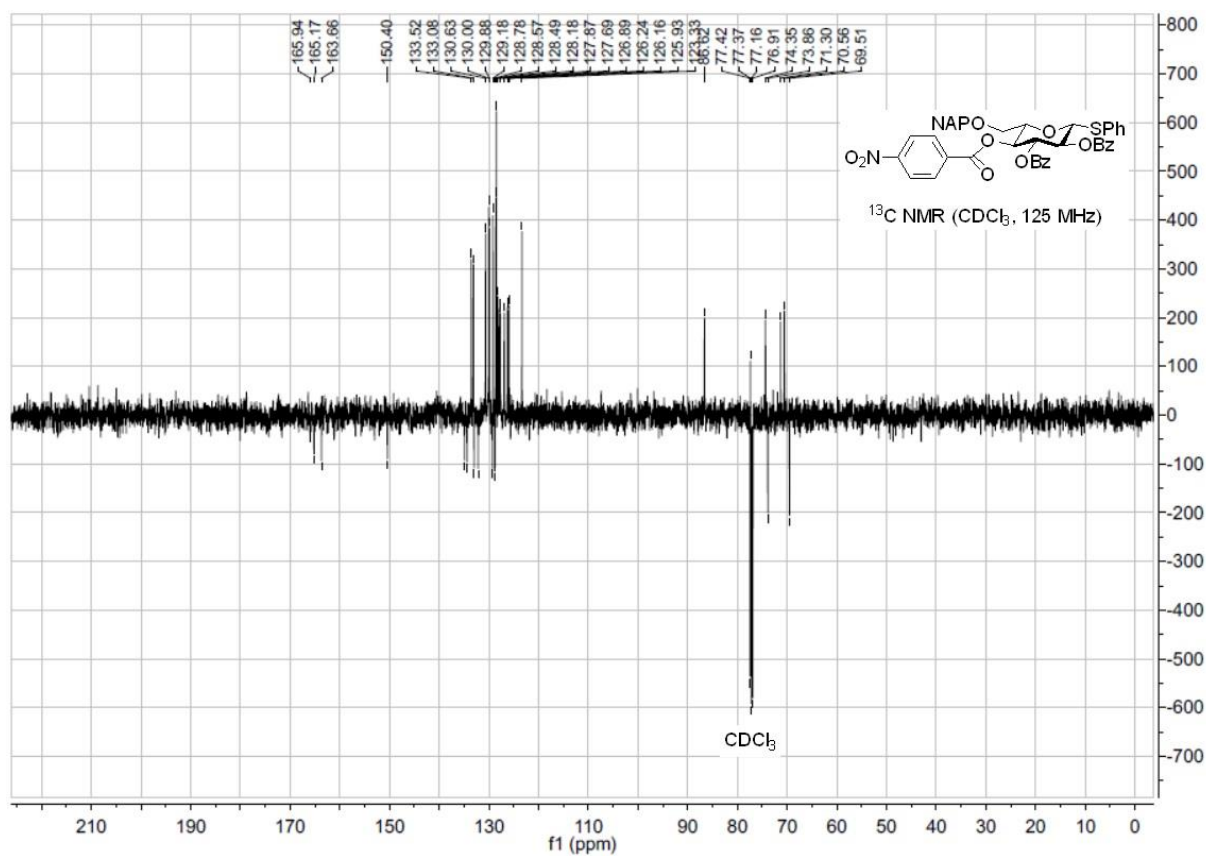

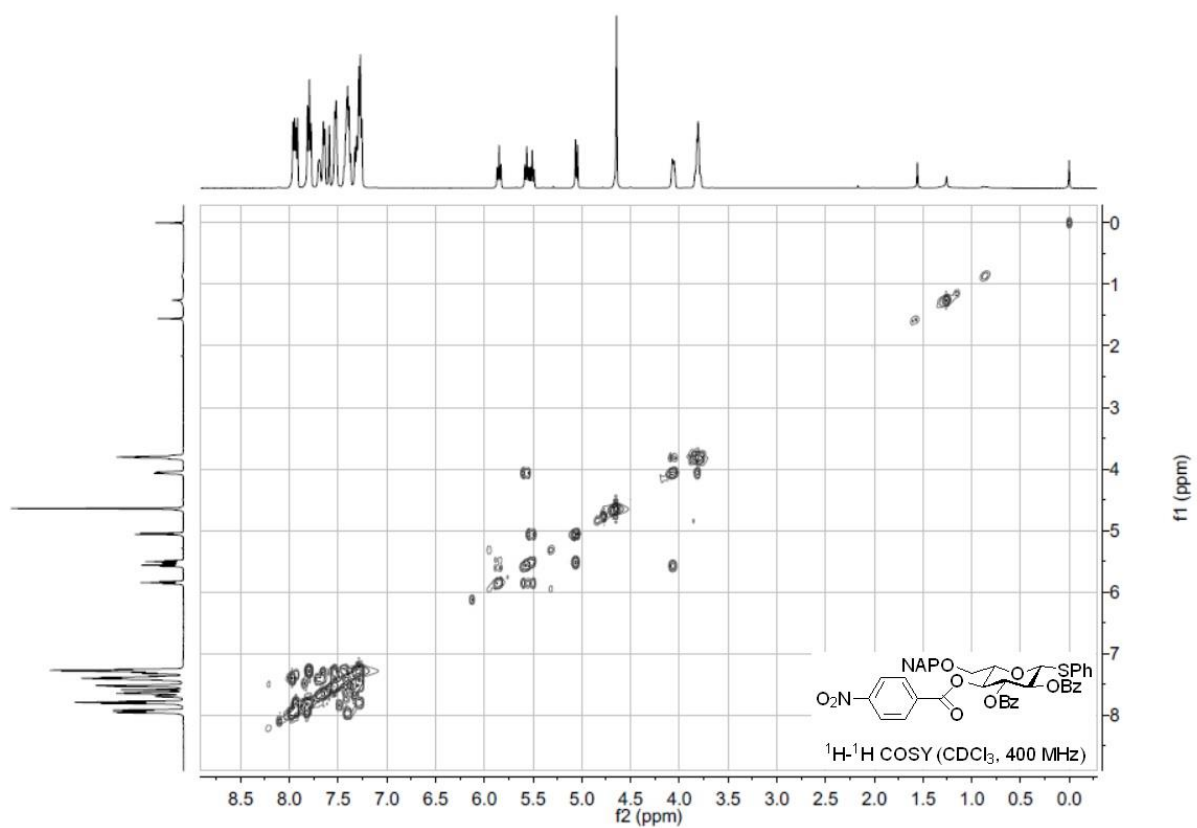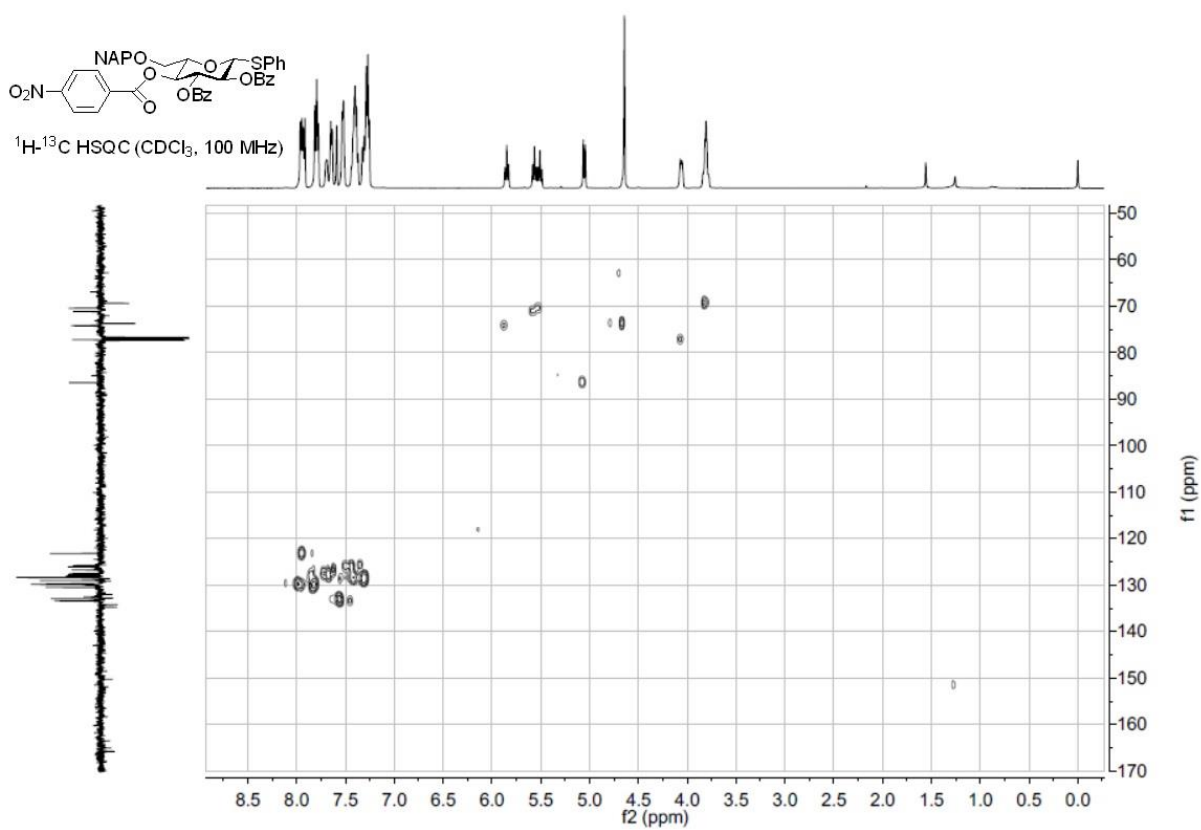



$^1\text{H}$  and  $^{13}\text{C}$  NMR spectra of compound 88

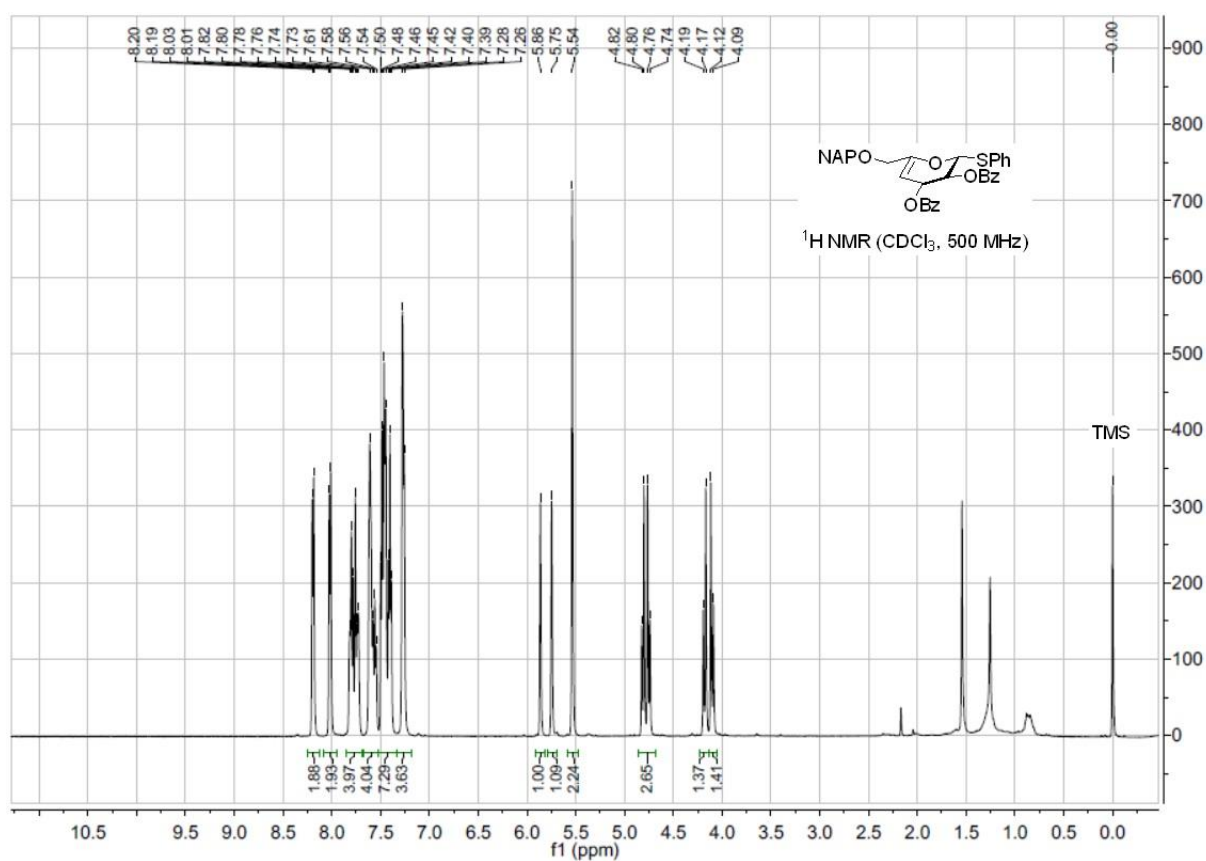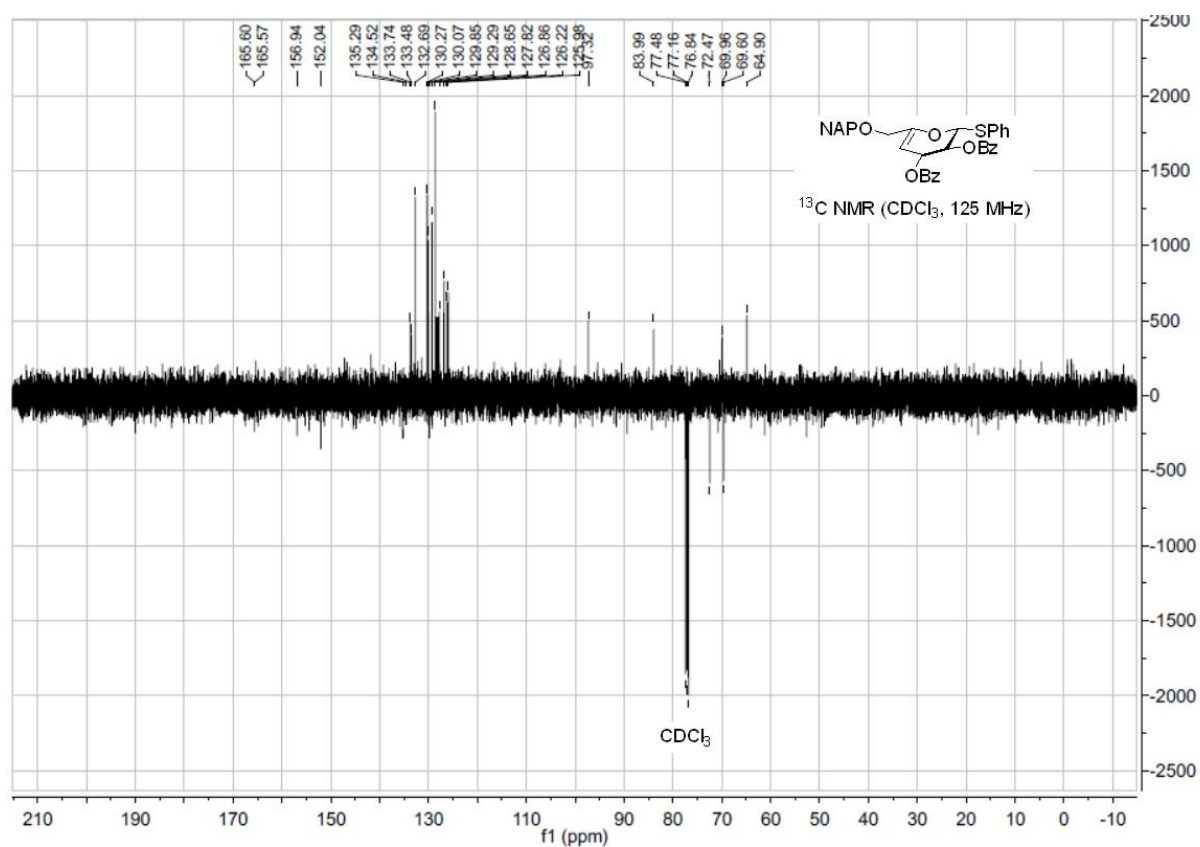



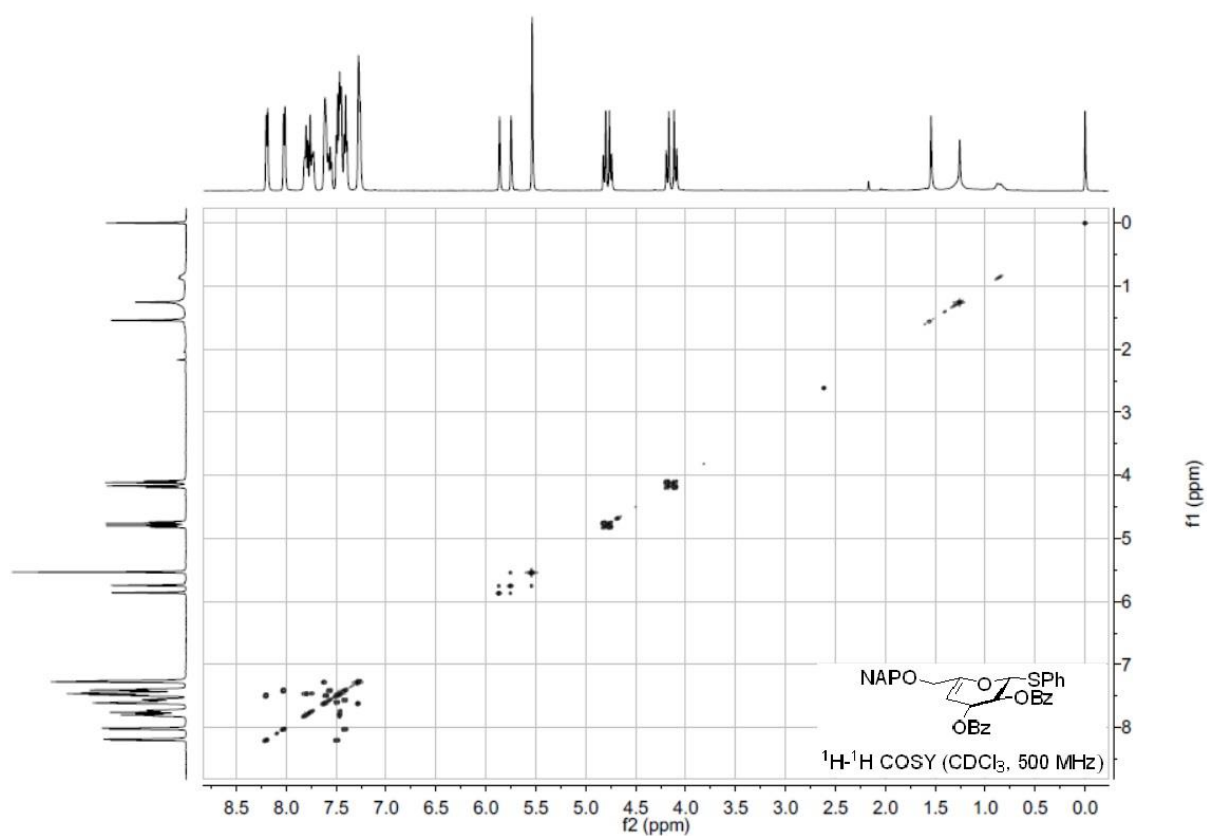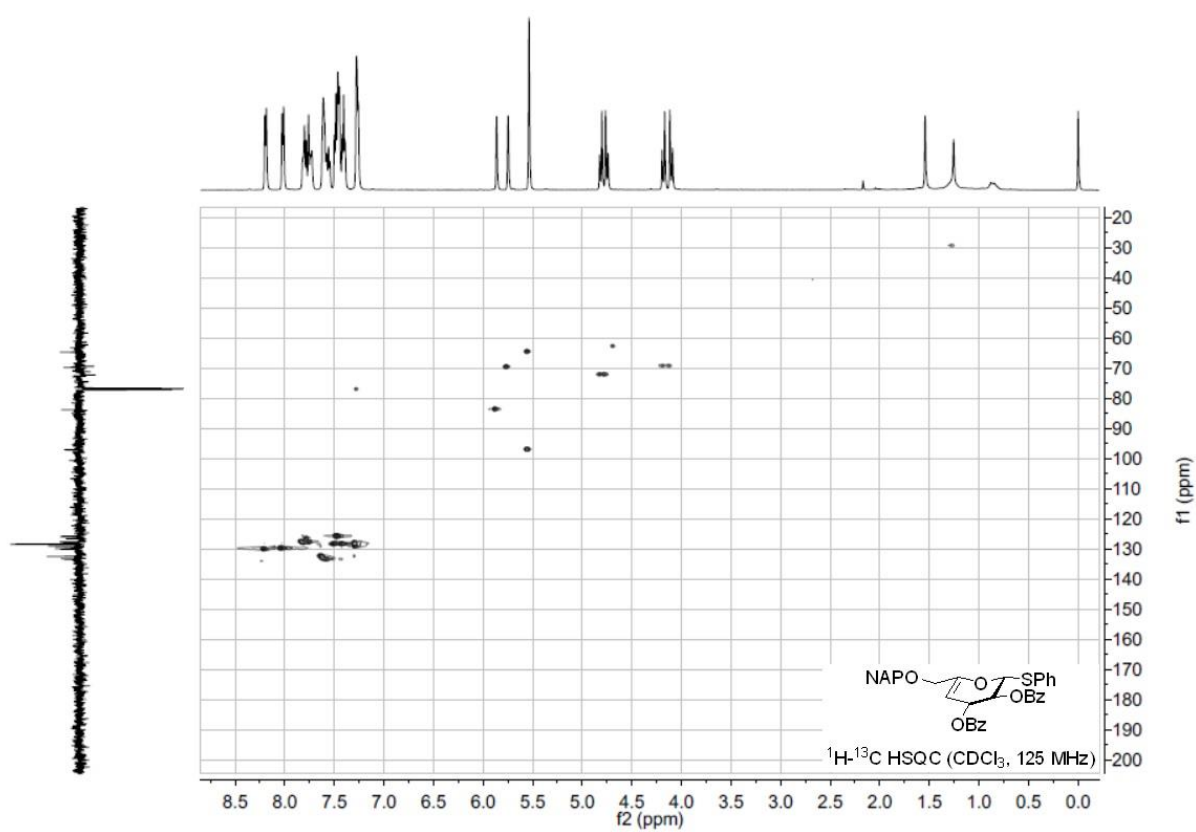

## X-ray structure analysis of compound 83

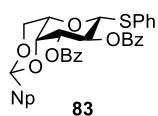

CCDC 2163274

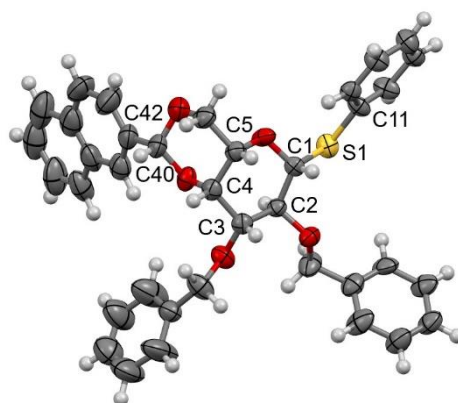

### Experimental details

| Crystal data                       |                                                  |
|------------------------------------|--------------------------------------------------|
| Chemical formula                   | C <sub>37</sub> H <sub>34</sub> O <sub>5</sub> S |
| <i>M</i> <sub>r</sub>              | 590.70                                           |
| Crystal system, space group        | Monoclinic, <i>C</i> 2                           |
| Temperature (K)                    | 199                                              |
| <i>a</i> , <i>b</i> , <i>c</i> (Å) | 21.29 (2), 5.411 (4), 26.79 (2)                  |
| <i>b</i> (°)                       | 95.97 (4)                                        |
| <i>V</i> (Å <sup>3</sup> )         | 3069 (5)                                         |
| <i>Z</i>                           | 4                                                |
| Radiation type                     | Mo <i>K</i> α                                    |
| <i>m</i> (mm <sup>-1</sup> )       | 0.15                                             |
| Crystal size (mm)                  | 0.35 × 0.08 × 0.05                               |
|                                    |                                                  |

|                                                                       |                                                                                                                                     |
|-----------------------------------------------------------------------|-------------------------------------------------------------------------------------------------------------------------------------|
| Data collection                                                       |                                                                                                                                     |
| Diffractometer                                                        | Bruker D8 VENTURE                                                                                                                   |
| Absorption correction                                                 | Multi-scan<br><i>SAINT</i> V8.38A (Bruker AXS Inc., 2017)                                                                           |
| $T_{\min}, T_{\max}$                                                  | 0.63, 0.99                                                                                                                          |
| No. of measured, independent and observed [ $I > 2s(I)$ ] reflections | 12038, 3399, 1822                                                                                                                   |
| $R_{\text{int}}$                                                      | 0.164                                                                                                                               |
| $q_{\max}$ (°)                                                        | 21.5                                                                                                                                |
| $(\sin \theta/\lambda)_{\max}$ (Å <sup>-1</sup> )                     | 0.516                                                                                                                               |
| Refinement                                                            |                                                                                                                                     |
| $R[F^2 > 2s(F^2)], wR(F^2), S$                                        | 0.098, 0.290, 1.05                                                                                                                  |
| No. of reflections                                                    | 3399                                                                                                                                |
| No. of parameters                                                     | 389                                                                                                                                 |
| No. of restraints                                                     | 343                                                                                                                                 |
| H-atom treatment                                                      | H-atom parameters constrained                                                                                                       |
| $DQ_{\max}, DQ_{\min}$ (e Å <sup>-3</sup> )                           | 0.32, -0.26                                                                                                                         |
| Absolute structure                                                    | Flack $x$ determined using 466 quotients $[(I^+)-(I^-)]/[(I^+)+(I^-)]$ (Parsons, Flack and Wagner, Acta Cryst. B69 (2013) 249-259). |
| Absolute structure parameter                                          | 0.1 (2)                                                                                                                             |

Computer programs: Bruker Instrument Service vV6.2.6, *APEX3* v2017.3-0 (Bruker AXS), *SAINT* V8.38A (Bruker AXS Inc., 2017), *SHELXT* 2014/5 (Sheldrick, 2014), *SHELXL*2018/3 (Sheldrick, 2018), *Mercury*, *WinGX*, *publCIF*.

## References

Document origin: *publCIF* [Westrip, S. P. (2010). *J. Apply. Cryst.*, **43**, 920-925].

## Computing details

Data collection: Bruker Instrument Service vV6.2.6; cell refinement: *APEX3* v2017.3-0 (Bruker AXS); data reduction: *SAINT* V8.38A (Bruker AXS Inc., 2017); program(s) used to solve structure: *SHELXT* 2014/5 (Sheldrick, 2014); program(s) used to refine structure: *SHELXL*2018/3 (Sheldrick, 2018); molecular graphics: *Mercury*; software used to prepare material for publication: *WinGX*, *publCIF*.

### Crystal data

|                              |                                                         |
|------------------------------|---------------------------------------------------------|
| $C_{37}H_{34}O_5S$           | $F(000) = 1248$                                         |
| $M_r = 590.70$               | $D_x = 1.278 \text{ Mg m}^{-3}$                         |
| Monoclinic, $C2$             | Mo $K\alpha$ radiation, $\lambda = 0.71073 \text{ \AA}$ |
| $a = 21.29 (2) \text{ \AA}$  | Cell parameters from 1699 reflections                   |
| $b = 5.411 (4) \text{ \AA}$  | $q = 2.6\text{--}20.8^\circ$                            |
| $c = 26.79 (2) \text{ \AA}$  | $m = 0.15 \text{ mm}^{-1}$                              |
| $\beta = 95.97 (4)^\circ$    | $T = 199 \text{ K}$                                     |
| $V = 3069 (5) \text{ \AA}^3$ | Needle, colourless                                      |
| $Z = 4$                      | $0.35 \times 0.08 \times 0.05 \text{ mm}$               |

### Data collection

|                                                            |                                                              |
|------------------------------------------------------------|--------------------------------------------------------------|
| Bruker D8 VENTURE diffractometer                           | 3399 independent reflections                                 |
| Radiation source: microfocus sealed tube, INCOATEC ImS 3.0 | 1822 reflections with $I > 2s(I)$                            |
| Multilayer mirror INCOATEC monochromator                   | $R_{\text{int}} = 0.164$                                     |
| Detector resolution: $7.3910 \text{ pixels mm}^{-1}$       | $q_{\text{max}} = 21.5^\circ$ , $q_{\text{min}} = 2.6^\circ$ |

|                                                                                  |                            |
|----------------------------------------------------------------------------------|----------------------------|
| w and p scan                                                                     | $h = -21 \textcircled{21}$ |
| Absorption correction: multi-scan<br><i>SAINT</i> V8.38A (Bruker AXS Inc., 2017) | $k = -5 \textcircled{5}$   |
| $T_{\min} = 0.63$ , $T_{\max} = 0.99$                                            | $l = -27 \textcircled{27}$ |
| 12038 measured reflections                                                       |                            |

### Refinement

|                                                                |                                                                                                                                                               |
|----------------------------------------------------------------|---------------------------------------------------------------------------------------------------------------------------------------------------------------|
| Refinement on $F^2$                                            | Hydrogen site location: inferred from neighbouring sites                                                                                                      |
| Least-squares matrix: full                                     | H-atom parameters constrained                                                                                                                                 |
| $R[F^2 > 2s(F^2)] = 0.098$                                     | $w = 1/[s^2(F_o^2) + (0.1335P)^2 + 3.4846P]$<br>where $P = (F_o^2 + 2F_c^2)/3$                                                                                |
| $wR(F^2) = 0.290$                                              | $(D/s)_{\max} = 0.019$                                                                                                                                        |
| $S = 1.05$                                                     | $DQ_{\max} = 0.32 \text{ e } \text{\AA}^{-3}$                                                                                                                 |
| 3399 reflections                                               | $DQ_{\min} = -0.26 \text{ e } \text{\AA}^{-3}$                                                                                                                |
| 389 parameters                                                 | Extinction correction: <i>SHELXL2018/3</i> (Sheldrick 2018)                                                                                                   |
| 343 restraints                                                 | Extinction coefficient: 0.009 (2)                                                                                                                             |
| Primary atom site location: structure-invariant direct methods | Absolute structure: Flack x determined using 466 quotients $[(I^+)-(I^-)]/[(I^+)+(I^-)]$ (Parsons, Flack and Wagner, <i>Acta Cryst. B</i> 69 (2013) 249-259). |
| Secondary atom site location: difference Fourier map           | Absolute structure parameter: 0.1 (2)                                                                                                                         |

### Special details

*Geometry.* All esds (except the esd in the dihedral angle between two l.s. planes) are estimated using the full covariance matrix. The cell esds are taken into account individually in the estimation of esds in distances, angles and torsion angles; correlations between esds in cell parameters are only used when they are defined by crystal symmetry. An approximate (isotropic) treatment of cell esds is used for estimating esds involving l.s. planes.

*Fractional atomic coordinates and isotropic or equivalent isotropic displacement parameters ( $\text{\AA}^2$ ) for compound 83*

|      | <i>x</i>   | <i>y</i>   | <i>z</i>   | $U_{\text{iso}}^*/U_{\text{eq}}$ |
|------|------------|------------|------------|----------------------------------|
| C1   | 0.2589 (7) | 0.221 (3)  | 0.3468 (5) | 0.048 (4)                        |
| H1   | 0.25576    | 0.365859   | 0.369712   | 0.057*                           |
| C2   | 0.2057 (7) | 0.237 (3)  | 0.3056 (6) | 0.050 (4)                        |
| H2   | 0.202681   | 0.073935   | 0.287767   | 0.06*                            |
| C3   | 0.2152 (7) | 0.434 (3)  | 0.2676 (6) | 0.057 (3)                        |
| H3   | 0.205917   | 0.597341   | 0.282828   | 0.069*                           |
| C4   | 0.2823 (8) | 0.443 (4)  | 0.2535 (6) | 0.060 (4)                        |
| H4   | 0.288064   | 0.59771    | 0.234074   | 0.072*                           |
| C5   | 0.3292 (7) | 0.442 (4)  | 0.3005 (6) | 0.063 (4)                        |
| H5   | 0.32614    | 0.5963     | 0.320592   | 0.075*                           |
| C6   | 0.3931 (8) | 0.412 (4)  | 0.2837 (7) | 0.077 (5)                        |
| H6A  | 0.404054   | 0.565941   | 0.266488   | 0.092*                           |
| H6AB | 0.423985   | 0.39189    | 0.31364    | 0.092*                           |
| C11  | 0.2984 (8) | -0.024 (3) | 0.4396 (6) | 0.060 (4)                        |
| C12  | 0.2962 (8) | -0.208 (3) | 0.4715 (7) | 0.067 (5)                        |
| H12  | 0.269851   | -0.346396  | 0.462764   | 0.08*                            |
| C13  | 0.3332 (8) | -0.200 (3) | 0.5192 (7) | 0.064 (5)                        |



|      |              |            |             |            |
|------|--------------|------------|-------------|------------|
| H13  | 0.328763     | -0.324591  | 0.543622    | 0.077*     |
| C14  | 0.3754 (9)   | -0.010 (4) | 0.5289 (7)  | 0.076 (5)  |
| H14  | 0.402213     | -0.006632  | 0.55953     | 0.091*     |
| C15  | 0.3791 (8)   | 0.180 (3)  | 0.4939 (7)  | 0.068 (5)  |
| H15  | 0.406652     | 0.315251   | 0.501867    | 0.082*     |
| C16  | 0.3429 (8)   | 0.173 (3)  | 0.4476 (6)  | 0.056 (4)  |
| H16  | 0.347532     | 0.293586   | 0.42255     | 0.068*     |
| C20  | 0.0950 (8)   | 0.142 (4)  | 0.3066 (7)  | 0.087 (6)  |
| H20A | 0.10582      | -0.033659  | 0.301803    | 0.105*     |
| H20B | 0.078869     | 0.212315   | 0.273572    | 0.105*     |
| C21  | 0.0459 (9)   | 0.164 (4)  | 0.3429 (7)  | 0.074 (5)  |
| C22  | 0.0435 (8)   | -0.007 (4) | 0.3816 (7)  | 0.080 (6)  |
| H22  | 0.073017     | -0.138598  | 0.385408    | 0.096*     |
| C23  | -0.0023 (8)  | 0.017 (4)  | 0.4144 (8)  | 0.084 (6)  |
| H23  | -0.003728    | -0.0974    | 0.441152    | 0.101*     |
| C24  | -0.0447 (9)  | 0.201 (4)  | 0.4086 (8)  | 0.085 (6)  |
| H24  | -0.076431    | 0.213606   | 0.430939    | 0.102*     |
| C25  | -0.0428 (10) | 0.367 (4)  | 0.3716 (8)  | 0.094 (7)  |
| H25  | -0.072777    | 0.497068   | 0.368126    | 0.113*     |
| C26  | 0.0022 (10)  | 0.348 (4)  | 0.3387 (10) | 0.096 (7)  |
| H26  | 0.002881     | 0.466663   | 0.312575    | 0.115*     |
| C30  | 0.1549 (11)  | 0.611 (3)  | 0.1950 (7)  | 0.087 (6)  |
| H30A | 0.19406      | 0.704277   | 0.191137    | 0.105*     |
| H30B | 0.125839     | 0.71992    | 0.211282    | 0.105*     |
| C31  | 0.1248 (9)   | 0.534 (4)  | 0.1447 (8)  | 0.077 (6)  |
| C32  | 0.0822 (13)  | 0.672 (6)  | 0.1176 (11) | 0.157 (13) |
| H32  | 0.067284     | 0.822886   | 0.130294    | 0.188*     |

|      |             |            |             |            |
|------|-------------|------------|-------------|------------|
| C33  | 0.0595 (15) | 0.585 (7)  | 0.0681 (11) | 0.160 (14) |
| H33  | 0.027039    | 0.674729   | 0.049055    | 0.192*     |
| C34  | 0.0810 (15) | 0.395 (6)  | 0.0493 (11) | 0.130 (10) |
| H34  | 0.06718     | 0.346965   | 0.015876    | 0.156*     |
| C35  | 0.1201 (16) | 0.274 (7)  | 0.0753 (11) | 0.152 (12) |
| H35  | 0.135178    | 0.126575   | 0.061371    | 0.182*     |
| C36  | 0.1442 (16) | 0.337 (6)  | 0.1238 (11) | 0.155 (13) |
| H36  | 0.175116    | 0.235194   | 0.14175     | 0.186*     |
| C40  | 0.3556 (9)  | 0.235 (4)  | 0.2085 (7)  | 0.079 (5)  |
| H40  | 0.36324     | 0.395726   | 0.19176     | 0.095*     |
| C41  | 0.3148 (11) | -0.064 (4) | 0.1431 (7)  | 0.087 (5)  |
| H41  | 0.27354     | -0.001411  | 0.145647    | 0.104*     |
| C42  | 0.3644 (12) | 0.027 (4)  | 0.1722 (8)  | 0.088 (6)  |
| C43  | 0.4214 (12) | -0.058 (6) | 0.1671 (9)  | 0.124 (7)  |
| H43  | 0.455301    | 0.0129     | 0.188229    | 0.149*     |
| C44  | 0.4367 (13) | -0.234 (6) | 0.1353 (10) | 0.132 (9)  |
| H44  | 0.478872    | -0.289074  | 0.134098    | 0.159*     |
| C45  | 0.3954 (18) | -0.537 (6) | 0.0676 (12) | 0.143 (9)  |
| H45  | 0.437036    | -0.596416  | 0.065121    | 0.172*     |
| C44A | 0.3828 (16) | -0.336 (5) | 0.1023 (10) | 0.116 (7)  |
| C46  | 0.3442 (19) | -0.635 (5) | 0.0390 (12) | 0.139 (11) |
| H46  | 0.34864     | -0.763565  | 0.015636    | 0.167*     |
| C47  | 0.2878 (17) | -0.540 (5) | 0.0456 (9)  | 0.132 (9)  |
| H47  | 0.2523      | -0.608883  | 0.02592     | 0.158*     |
| C48  | 0.2766 (14) | -0.362 (4) | 0.0764 (8)  | 0.112 (7)  |
| H48  | 0.234617    | -0.303568  | 0.077428    | 0.134*     |
| C48A | 0.3250 (13) | -0.259 (5) | 0.1074 (8)  | 0.100 (6)  |

|     |            |             |              |             |
|-----|------------|-------------|--------------|-------------|
| O2  | 0.1490 (5) | 0.274 (2)   | 0.3271 (4)   | 0.060 (3)   |
| O3  | 0.1699 (6) | 0.3946 (19) | 0.2263 (4)   | 0.070 (3)   |
| O4  | 0.2916 (5) | 0.2325 (19) | 0.2223 (4)   | 0.065 (3)   |
| O6  | 0.3182 (5) | 0.225 (2)   | 0.3294 (4)   | 0.064 (3)   |
| O60 | 0.3992 (6) | 0.210 (3)   | 0.2510 (5)   | 0.086 (4)   |
| S1  | 0.2496 (2) | -0.0558 (8) | 0.38186 (16) | 0.0641 (15) |

*Atomic displacement parameters ( $\text{\AA}^2$ ) for compound 83*

|     | $U^{11}$   | $U^{22}$   | $U^{33}$   | $U^{12}$       | $U^{13}$       | $U^{23}$       |
|-----|------------|------------|------------|----------------|----------------|----------------|
| C1  | 0.056 (7)  | 0.033 (8)  | 0.053 (9)  | -0.003 (7)     | 0.003 (6)      | 0.000 (7)      |
| C2  | 0.047 (7)  | 0.051 (10) | 0.054 (9)  | -0.001 (8)     | 0.008 (6)      | 0.001 (7)      |
| C3  | 0.065 (8)  | 0.045 (8)  | 0.062 (9)  | 0.002 (8)      | 0.008 (6)      | -0.001 (8)     |
| C4  | 0.071 (8)  | 0.046 (8)  | 0.065 (9)  | 0.003 (9)      | 0.014 (6)      | 0.008 (8)      |
| C5  | 0.056 (8)  | 0.061 (9)  | 0.072 (9)  | 0.002 (9)      | 0.012 (6)      | 0.012 (9)      |
| C6  | 0.059 (9)  | 0.080 (12) | 0.092 (12) | -0.001<br>(10) | 0.019 (8)      | 0.017 (9)      |
| C11 | 0.076 (11) | 0.041 (9)  | 0.058 (9)  | 0.003 (7)      | -0.009 (8)     | 0.004 (7)      |
| C12 | 0.073 (12) | 0.040 (9)  | 0.083 (11) | -0.013 (9)     | -0.012 (9)     | 0.011 (8)      |
| C13 | 0.075 (12) | 0.051 (9)  | 0.066 (10) | 0.008 (8)      | 0.002 (8)      | 0.005 (9)      |
| C14 | 0.085 (13) | 0.075 (12) | 0.066 (11) | -0.008 (9)     | -0.001<br>(10) | 0.003 (8)      |
| C15 | 0.079 (12) | 0.051 (9)  | 0.073 (10) | -0.008 (9)     | -0.004 (8)     | -0.007 (8)     |
| C16 | 0.063 (10) | 0.042 (8)  | 0.065 (9)  | 0.006 (7)      | 0.011 (7)      | 0.002 (8)      |
| C20 | 0.055 (9)  | 0.132 (17) | 0.075 (12) | -0.025<br>(10) | 0.007 (8)      | -0.026<br>(12) |
| C21 | 0.060 (10) | 0.078 (11) | 0.085 (12) | -0.010 (8)     | 0.014 (9)      | -0.007 (9)     |
| C22 | 0.038 (10) | 0.096 (14) | 0.104 (14) | 0.010 (10)     | 0.003 (8)      | 0.017 (10)     |
| C23 | 0.058 (12) | 0.075 (13) | 0.123 (16) | -0.007 (8)     | 0.023 (10)     | 0.023 (11)     |

|      |            |            |            |                |                |                |
|------|------------|------------|------------|----------------|----------------|----------------|
| C24  | 0.065 (12) | 0.087 (13) | 0.107 (15) | 0.002 (9)      | 0.032 (11)     | 0.007 (11)     |
| C25  | 0.084 (14) | 0.076 (14) | 0.128 (18) | 0.011 (10)     | 0.038 (12)     | 0.019 (11)     |
| C26  | 0.074 (13) | 0.071 (13) | 0.150 (19) | -0.007 (9)     | 0.042 (12)     | 0.027 (12)     |
| C30  | 0.122 (17) | 0.058 (11) | 0.077 (11) | 0.000 (11)     | -0.015<br>(11) | 0.005 (8)      |
| C31  | 0.073 (13) | 0.084 (13) | 0.074 (11) | 0.004 (9)      | 0.000 (9)      | 0.010 (8)      |
| C32  | 0.16 (3)   | 0.17 (3)   | 0.124 (18) | 0.09 (2)       | -0.056<br>(17) | -0.028<br>(17) |
| C33  | 0.15 (3)   | 0.22 (3)   | 0.106 (19) | 0.07 (2)       | -0.046<br>(18) | -0.014<br>(18) |
| C34  | 0.13 (2)   | 0.15 (3)   | 0.099 (19) | -0.003<br>(17) | -0.008<br>(15) | -0.003<br>(16) |
| C35  | 0.19 (3)   | 0.16 (3)   | 0.091 (17) | 0.05 (2)       | -0.021<br>(17) | -0.026<br>(16) |
| C36  | 0.20 (3)   | 0.127 (19) | 0.122 (18) | 0.07 (2)       | -0.050<br>(19) | -0.041<br>(16) |
| C40  | 0.072 (10) | 0.099 (14) | 0.071 (10) | 0.008 (10)     | 0.029 (7)      | 0.013 (9)      |
| C41  | 0.110 (14) | 0.075 (12) | 0.078 (13) | 0.008 (12)     | 0.027 (10)     | 0.020 (10)     |
| C42  | 0.095 (13) | 0.105 (15) | 0.070 (12) | 0.017 (11)     | 0.032 (10)     | 0.013 (9)      |
| C43  | 0.104 (13) | 0.137 (19) | 0.139 (19) | 0.025 (14)     | 0.053 (14)     | 0.011 (15)     |
| C44  | 0.111 (16) | 0.15 (2)   | 0.14 (2)   | 0.059 (15)     | 0.051 (13)     | 0.018 (14)     |
| C45  | 0.20 (3)   | 0.106 (18) | 0.14 (2)   | 0.020 (18)     | 0.096 (18)     | 0.023 (14)     |
| C44A | 0.159 (16) | 0.096 (16) | 0.101 (16) | 0.031 (14)     | 0.051 (13)     | 0.035 (11)     |
| C46  | 0.23 (3)   | 0.079 (18) | 0.12 (2)   | 0.019 (16)     | 0.087 (19)     | 0.017 (14)     |
| C47  | 0.21 (3)   | 0.097 (16) | 0.095 (16) | 0.003 (17)     | 0.053 (17)     | -0.020<br>(13) |
| C48  | 0.183 (19) | 0.088 (15) | 0.064 (14) | 0.030 (14)     | 0.007 (12)     | -0.003<br>(10) |

|      |            |            |            |            |            |            |
|------|------------|------------|------------|------------|------------|------------|
| C48A | 0.143 (16) | 0.096 (15) | 0.062 (13) | 0.025 (12) | 0.018 (11) | 0.017 (9)  |
| O2   | 0.051 (6)  | 0.066 (7)  | 0.064 (7)  | -0.002 (5) | 0.006 (5)  | -0.015 (6) |
| O3   | 0.084 (8)  | 0.058 (8)  | 0.065 (7)  | -0.002 (6) | -0.007 (6) | -0.004 (6) |
| O4   | 0.076 (7)  | 0.054 (7)  | 0.069 (7)  | -0.003 (6) | 0.026 (6)  | 0.001 (5)  |
| O6   | 0.045 (6)  | 0.058 (7)  | 0.090 (8)  | 0.007 (6)  | 0.007 (5)  | 0.014 (6)  |
| O60  | 0.083 (8)  | 0.102 (9)  | 0.074 (8)  | 0.008 (8)  | 0.020 (6)  | 0.010 (7)  |
| S1   | 0.078 (3)  | 0.052 (3)  | 0.063 (3)  | -0.006 (3) | 0.007 (2)  | -0.003 (3) |

*Geometric parameters (Å, °) for compound 83*

|        |            |          |          |
|--------|------------|----------|----------|
| C1—O6  | 1.391 (17) | C24—H24  | 0.95     |
| C1—C2  | 1.500 (19) | C25—C26  | 1.37 (3) |
| C1—S1  | 1.791 (15) | C25—H25  | 0.95     |
| C1—H1  | 1.0        | C26—H26  | 0.95     |
| C2—O2  | 1.404 (17) | C30—O3   | 1.45 (2) |
| C2—C3  | 1.50 (2)   | C30—C31  | 1.49 (3) |
| C2—H2  | 1.0        | C30—H30A | 0.99     |
| C3—O3  | 1.409 (17) | C30—H30B | 0.99     |
| C3—C4  | 1.51 (2)   | C31—C36  | 1.29 (3) |
| C3—H3  | 1.0        | C31—C32  | 1.33 (3) |
| C4—O4  | 1.44 (2)   | C32—C33  | 1.44 (4) |
| C4—C5  | 1.52 (2)   | C32—H32  | 0.95     |
| C4—H4  | 1.0        | C33—C34  | 1.25 (4) |
| C5—O6  | 1.44 (2)   | C33—H33  | 0.95     |
| C5—C6  | 1.48 (2)   | C34—C35  | 1.22 (4) |
| C5—H5  | 1.0        | C34—H34  | 0.95     |
| C6—O60 | 1.42 (2)   | C35—C36  | 1.39 (3) |
| C6—H6A | 0.99       | C35—H35  | 0.95     |

|          |            |             |            |
|----------|------------|-------------|------------|
| C6—H6AB  | 0.99       | C36—H36     | 0.95       |
| C11—C12  | 1.32 (2)   | C40—O60     | 1.40 (2)   |
| C11—C16  | 1.43 (2)   | C40—O4      | 1.449 (19) |
| C11—S1   | 1.779 (16) | C40—C42     | 1.51 (3)   |
| C12—C13  | 1.43 (2)   | C40—H40     | 1.0        |
| C12—H12  | 0.95       | C41—C42     | 1.34 (3)   |
| C13—C14  | 1.38 (2)   | C41—C48A    | 1.46 (3)   |
| C13—H13  | 0.95       | C41—H41     | 0.95       |
| C14—C15  | 1.40 (2)   | C42—C43     | 1.32 (3)   |
| C14—H14  | 0.95       | C43—C44     | 1.34 (4)   |
| C15—C16  | 1.39 (2)   | C43—H43     | 0.95       |
| C15—H15  | 0.95       | C44—C44A    | 1.48 (4)   |
| C16—H16  | 0.95       | C44—H44     | 0.95       |
| C20—O2   | 1.416 (19) | C45—C46     | 1.37 (4)   |
| C20—C21  | 1.51 (2)   | C45—C44A    | 1.47 (4)   |
| C20—H20A | 0.99       | C45—H45     | 0.95       |
| C20—H20B | 0.99       | C44A—C48A   | 1.32 (3)   |
| C21—C26  | 1.36 (3)   | C46—C47     | 1.33 (4)   |
| C21—C22  | 1.40 (3)   | C46—H46     | 0.95       |
| C22—C23  | 1.39 (3)   | C47—C48     | 1.31 (3)   |
| C22—H22  | 0.95       | C47—H47     | 0.95       |
| C23—C24  | 1.34 (2)   | C48—C48A    | 1.37 (3)   |
| C23—H23  | 0.95       | C48—H48     | 0.95       |
| C24—C25  | 1.34 (3)   |             |            |
|          |            |             |            |
| O6—C1—C2 | 113.2 (12) | C24—C25—C26 | 120.3 (19) |
| O6—C1—S1 | 110.0 (10) | C24—C25—H25 | 119.9      |

|          |            |               |            |
|----------|------------|---------------|------------|
| C2—C1—S1 | 108.4 (10) | C26—C25—H25   | 119.8      |
| O6—C1—H1 | 108.4      | C21—C26—C25   | 121 (2)    |
| C2—C1—H1 | 108.4      | C21—C26—H26   | 119.4      |
| S1—C1—H1 | 108.4      | C25—C26—H26   | 119.4      |
| O2—C2—C3 | 110.8 (12) | O3—C30—C31    | 110.3 (15) |
| O2—C2—C1 | 108.7 (12) | O3—C30—H30A   | 109.6      |
| C3—C2—C1 | 113.1 (13) | C31—C30—H30A  | 109.6      |
| O2—C2—H2 | 108.0      | O3—C30—H30B   | 109.6      |
| C3—C2—H2 | 108.0      | C31—C30—H30B  | 109.6      |
| C1—C2—H2 | 108.0      | H30A—C30—H30B | 108.1      |
| O3—C3—C2 | 107.1 (14) | C36—C31—C32   | 117 (2)    |
| O3—C3—C4 | 113.2 (12) | C36—C31—C30   | 120 (2)    |
| C2—C3—C4 | 112.9 (13) | C32—C31—C30   | 123 (2)    |
| O3—C3—H3 | 107.8      | C31—C32—C33   | 117 (3)    |
| C2—C3—H3 | 107.8      | C31—C32—H32   | 121.3      |
| C4—C3—H3 | 107.8      | C33—C32—H32   | 121.3      |
| O4—C4—C3 | 108.1 (14) | C34—C33—C32   | 123 (3)    |
| O4—C4—C5 | 111.0 (14) | C34—C33—H33   | 118.7      |
| C3—C4—C5 | 110.4 (12) | C32—C33—H33   | 118.7      |
| O4—C4—H4 | 109.1      | C35—C34—C33   | 118 (4)    |
| C3—C4—H4 | 109.1      | C35—C34—H34   | 121.0      |
| C5—C4—H4 | 109.1      | C33—C34—H34   | 121.0      |
| O6—C5—C6 | 106.4 (15) | C34—C35—C36   | 124 (3)    |
| O6—C5—C4 | 108.5 (14) | C34—C35—H35   | 117.8      |
| C6—C5—C4 | 107.0 (14) | C36—C35—H35   | 117.8      |
| O6—C5—H5 | 111.6      | C31—C36—C35   | 120 (3)    |
| C6—C5—H5 | 111.6      | C31—C36—H36   | 119.8      |



|             |            |               |            |
|-------------|------------|---------------|------------|
| C4—C5—H5    | 111.6      | C35—C36—H36   | 119.8      |
| O60—C6—C5   | 114.7 (16) | O60—C40—O4    | 110.7 (14) |
| O60—C6—H6A  | 108.6      | O60—C40—C42   | 109.7 (17) |
| C5—C6—H6A   | 108.6      | O4—C40—C42    | 109.9 (17) |
| O60—C6—H6AB | 108.6      | O60—C40—H40   | 108.8      |
| C5—C6—H6AB  | 108.6      | O4—C40—H40    | 108.8      |
| H6A—C6—H6AB | 107.6      | C42—C40—H40   | 108.8      |
| C12—C11—C16 | 122.3 (15) | C42—C41—C48A  | 119 (2)    |
| C12—C11—S1  | 115.7 (13) | C42—C41—H41   | 120.4      |
| C16—C11—S1  | 121.5 (13) | C48A—C41—H41  | 120.4      |
| C11—C12—C13 | 120.3 (16) | C43—C42—C41   | 119 (2)    |
| C11—C12—H12 | 119.8      | C43—C42—C40   | 120 (2)    |
| C13—C12—H12 | 119.8      | C41—C42—C40   | 120 (2)    |
| C14—C13—C12 | 118.6 (17) | C42—C43—C44   | 127 (3)    |
| C14—C13—H13 | 120.7      | C42—C43—H43   | 116.5      |
| C12—C13—H13 | 120.7      | C44—C43—H43   | 116.5      |
| C13—C14—C15 | 120.3 (18) | C43—C44—C44A  | 115 (3)    |
| C13—C14—H14 | 119.8      | C43—C44—H44   | 122.5      |
| C15—C14—H14 | 119.8      | C44A—C44—H44  | 122.5      |
| C16—C15—C14 | 121.0 (17) | C46—C45—C44A  | 117 (3)    |
| C16—C15—H15 | 119.5      | C46—C45—H45   | 121.7      |
| C14—C15—H15 | 119.5      | C44A—C45—H45  | 121.7      |
| C15—C16—C11 | 116.9 (15) | C48A—C44A—C45 | 122 (3)    |
| C15—C16—H16 | 121.5      | C48A—C44A—C44 | 119 (3)    |
| C11—C16—H16 | 121.5      | C45—C44A—C44  | 118 (3)    |
| O2—C20—C21  | 107.4 (14) | C47—C46—C45   | 117 (3)    |
| O2—C20—H20A | 110.2      | C47—C46—H46   | 121.5      |

|               |             |                   |            |
|---------------|-------------|-------------------|------------|
| C21—C20—H20A  | 110.2       | C45—C46—H46       | 121.4      |
| O2—C20—H20B   | 110.2       | C48—C47—C46       | 126 (4)    |
| C21—C20—H20B  | 110.2       | C48—C47—H47       | 116.9      |
| H20A—C20—H20B | 108.5       | C46—C47—H47       | 116.9      |
| C26—C21—C22   | 117.9 (19)  | C47—C48—C48A      | 120 (3)    |
| C26—C21—C20   | 121 (2)     | C47—C48—H48       | 119.8      |
| C22—C21—C20   | 120.6 (19)  | C48A—C48—H48      | 119.8      |
| C23—C22—C21   | 119.6 (19)  | C44A—C48A—C48     | 117 (3)    |
| C23—C22—H22   | 120.2       | C44A—C48A—C41     | 120 (3)    |
| C21—C22—H22   | 120.2       | C48—C48A—C41      | 123 (3)    |
| C24—C23—C22   | 120 (2)     | C2—O2—C20         | 117.6 (12) |
| C24—C23—H23   | 119.8       | C3—O3—C30         | 115.0 (13) |
| C22—C23—H23   | 119.8       | C4—O4—C40         | 109.3 (13) |
| C23—C24—C25   | 121 (2)     | C1—O6—C5          | 113.5 (11) |
| C23—C24—H24   | 119.7       | C40—O60—C6        | 109.5 (15) |
| C25—C24—H24   | 119.7       | C11—S1—C1         | 106.7 (8)  |
|               |             |                   |            |
| O6—C1—C2—O2   | -169.9 (11) | C48A—C41—C42—C43  | 2 (3)      |
| S1—C1—C2—O2   | 67.8 (13)   | C48A—C41—C42—C40  | 178.2 (17) |
| O6—C1—C2—C3   | -46.4 (18)  | O60—C40—C42—C43   | -36 (3)    |
| S1—C1—C2—C3   | -168.7 (11) | O4—C40—C42—C43    | -158 (2)   |
| O2—C2—C3—O3   | -69.9 (15)  | O60—C40—C42—C41   | 147.5 (19) |
| C1—C2—C3—O3   | 167.8 (13)  | O4—C40—C42—C41    | 26 (3)     |
| O2—C2—C3—C4   | 164.8 (13)  | C41—C42—C43—C44   | -1 (4)     |
| C1—C2—C3—C4   | 42.5 (19)   | C40—C42—C43—C44   | -177 (2)   |
| O3—C3—C4—O4   | -48.7 (19)  | C42—C43—C44—C44A  | 1 (4)      |
| C2—C3—C4—O4   | 73.1 (16)   | C46—C45—C44A—C48A | 3 (4)      |

|                 |             |                   |             |
|-----------------|-------------|-------------------|-------------|
| O3—C3—C4—C5     | -170.3 (15) | C46—C45—C44A—C44  | 177 (3)     |
| C2—C3—C4—C5     | -48 (2)     | C43—C44—C44A—C48A | -3 (4)      |
| O4—C4—C5—O6     | -62.7 (16)  | C43—C44—C44A—C45  | -178 (2)    |
| C3—C4—C5—O6     | 57.2 (19)   | C44A—C45—C46—C47  | -1 (4)      |
| O4—C4—C5—C6     | 52 (2)      | C45—C46—C47—C48   | 0 (4)       |
| C3—C4—C5—C6     | 171.6 (15)  | C46—C47—C48—C48A  | -2 (4)      |
| O6—C5—C6—O60    | 63.9 (18)   | C45—C44A—C48A—C48 | -4 (3)      |
| C4—C5—C6—O60    | -52 (2)     | C44—C44A—C48A—C48 | -179 (2)    |
| C16—C11—C12—C13 | 8 (3)       | C45—C44A—C48A—C41 | 178.5 (19)  |
| S1—C11—C12—C13  | -179.5 (14) | C44—C44A—C48A—C41 | 4 (4)       |
| C11—C12—C13—C14 | -6 (3)      | C47—C48—C48A—C44A | 4 (4)       |
| C12—C13—C14—C15 | 4 (3)       | C47—C48—C48A—C41  | -179 (2)    |
| C13—C14—C15—C16 | -4 (3)      | C42—C41—C48A—C44A | -3 (3)      |
| C14—C15—C16—C11 | 5 (2)       | C42—C41—C48A—C48  | 180 (2)     |
| C12—C11—C16—C15 | -8 (2)      | C3—C2—O2—C20      | 96.5 (17)   |
| S1—C11—C16—C15  | -179.5 (13) | C1—C2—O2—C20      | -138.7 (15) |
| O2—C20—C21—C26  | 92 (2)      | C21—C20—O2—C2     | 166.5 (15)  |
| O2—C20—C21—C22  | -89 (2)     | C2—C3—O3—C30      | 157.5 (14)  |
| C26—C21—C22—C23 | -1 (3)      | C4—C3—O3—C30      | -77.5 (19)  |
| C20—C21—C22—C23 | -179.7 (17) | C31—C30—O3—C3     | 160.8 (15)  |
| C21—C22—C23—C24 | 1 (3)       | C3—C4—O4—C40      | -179.5 (13) |
| C22—C23—C24—C25 | -1 (3)      | C5—C4—O4—C40      | -58.3 (17)  |
| C23—C24—C25—C26 | 1 (3)       | O60—C40—O4—C4     | 63.4 (19)   |
| C22—C21—C26—C25 | 0 (3)       | C42—C40—O4—C4     | -175.3 (14) |
| C20—C21—C26—C25 | 179.4 (19)  | C2—C1—O6—C5       | 58.2 (16)   |
| C24—C25—C26—C21 | 0 (3)       | S1—C1—O6—C5       | 179.6 (10)  |
| O3—C30—C31—C36  | -38 (3)     | C6—C5—O6—C1       | -178.3 (13) |

|                 |          |                |             |
|-----------------|----------|----------------|-------------|
| O3—C30—C31—C32  | 149 (2)  | C4—C5—O6—C1    | -63.4 (17)  |
| C36—C31—C32—C33 | 3 (5)    | O4—C40—O60—C6  | -62 (2)     |
| C30—C31—C32—C33 | 176 (3)  | C42—C40—O60—C6 | 176.9 (14)  |
| C31—C32—C33—C34 | -4 (6)   | C5—C6—O60—C40  | 58 (2)      |
| C32—C33—C34—C35 | 4 (6)    | C12—C11—S1—C1  | 177.7 (14)  |
| C33—C34—C35—C36 | -2 (6)   | C16—C11—S1—C1  | -10.1 (15)  |
| C32—C31—C36—C35 | -1 (5)   | O6—C1—S1—C11   | 72.2 (12)   |
| C30—C31—C36—C35 | -175 (3) | C2—C1—S1—C11   | -163.6 (11) |
| C34—C35—C36—C31 | 1 (6)    |                |             |
